# Supplementary material for: Comparative analysis of tissue-specific transcriptomes in the funnel-web spider Macrothele calpeiana (Araneae, Hexathelidae)
Source: PeerJ. 2015 Jun 30;3:e1064. doi: 10.7717/peerj.1064 (PMC4493671; doi:10.7717/peerj.1064)
Supplement: Table S1 — (A) List of the 5,752 Drosophila melanogaster and 3,786 human housekeeping genes used this study. (B) List of the Interpro domain associated with the chemosensory function. [file peerj-03-1064-s001.xlsx]

## Sheet: Table S1A. HouseKeeping genes
Table S1A.	List of Housekeeping (HK) genes
Drosophila melanogaster		Human
FlyBase identifier		Ensembl identifier
FBpp0070026		ENSG00000000419|ENST00000371588		Shaded in yellow: D. melanogaster HK genes with homologous in the human HK database
FBpp0070057		ENSG00000000457|ENST00000367771		Shaded in orange: Human HK genes with homologous in the D. melanogaster database
FBpp0070058		ENSG00000003056|ENST00000000412
FBpp0070059		ENSG00000003393|ENST00000264276
FBpp0070060		ENSG00000003756|ENST00000347869		Total human HK	3786
FBpp0070061		ENSG00000004059|ENST00000000233		Human HK shared	3036		0.801902
FBpp0070062		ENSG00000004142|ENST00000540200		Total Dm HK	5752
FBpp0070064		ENSG00000004534|ENST00000266022		Dm HK shared	5390		0.937065
FBpp0070078		ENSG00000004866|ENST00000393451
FBpp0070089		ENSG00000004897|ENST00000066544		This information was obtained through a blastp between the proteins of both databases.
FBpp0070117		ENSG00000005022|ENST00000317881			Blast parameters: Evalue cut-off = 1e-3; maximum target sequences = 1.
FBpp0070118		ENSG00000005075|ENST00000292614
FBpp0070119		ENSG00000005100|ENST00000225296		Genes (Identifiers from Drosophila and human) in the same raw, does not imply homology
FBpp0070120		ENSG00000005156|ENST00000262327
FBpp0070121		ENSG00000005175|ENST00000005386
FBpp0070122		ENSG00000005302|ENST00000380693
FBpp0070123		ENSG00000005700|ENST00000306270
FBpp0070124		ENSG00000005801|ENST00000354599
FBpp0070130		ENSG00000005812|ENST00000355619
FBpp0070131		ENSG00000005893|ENST00000434600
FBpp0070132		ENSG00000005955|ENST00000304718
FBpp0070143		ENSG00000006007|ENST00000353258
FBpp0070146		ENSG00000006451|ENST00000005257
FBpp0070154		ENSG00000006625|ENST00000005374
FBpp0070156		ENSG00000006712|ENST00000221265
FBpp0070160		ENSG00000006744|ENST00000338034
FBpp0070168		ENSG00000006831|ENST00000357103
FBpp0070175		ENSG00000007047|ENST00000300843
FBpp0070181		ENSG00000007168|ENST00000397195
FBpp0070202		ENSG00000007923|ENST00000377577
FBpp0070221		ENSG00000008018|ENST00000262193
FBpp0070224		ENSG00000008294|ENST00000357122
FBpp0070243		ENSG00000008382|ENST00000262966
FBpp0070249		ENSG00000008838|ENST00000394128
FBpp0070250		ENSG00000008952|ENST00000337002
FBpp0070259		ENSG00000009335|ENST00000348165
FBpp0070269		ENSG00000009954|ENST00000339594
FBpp0070277		ENSG00000010165|ENST00000362019
FBpp0070278		ENSG00000010244|ENST00000321233
FBpp0070304		ENSG00000010256|ENST00000203407
FBpp0070308		ENSG00000010322|ENST00000488380
FBpp0070320		ENSG00000011007|ENST00000418390
FBpp0070321		ENSG00000011275|ENST00000425013
FBpp0070322		ENSG00000011295|ENST00000261647
FBpp0070323		ENSG00000011376|ENST00000265537
FBpp0070336		ENSG00000011485|ENST00000012443
FBpp0070360		ENSG00000012061|ENST00000300853
FBpp0070361		ENSG00000012174|ENST00000379484
FBpp0070362		ENSG00000012232|ENST00000220562
FBpp0070363		ENSG00000012963|ENST00000013070
FBpp0070364		ENSG00000013275|ENST00000157812
FBpp0070370		ENSG00000013288|ENST00000285599
FBpp0070374		ENSG00000013306|ENST00000225308
FBpp0070389		ENSG00000013374|ENST00000566856
FBpp0070395		ENSG00000013583|ENST00000014930
FBpp0070402		ENSG00000014123|ENST00000369278
FBpp0070403		ENSG00000014216|ENST00000279247
FBpp0070409		ENSG00000014824|ENST00000264451
FBpp0070415		ENSG00000014919|ENST00000370483
FBpp0070418		ENSG00000015153|ENST00000534854
FBpp0070419		ENSG00000015171|ENST00000309776
FBpp0070423		ENSG00000015532|ENST00000017003
FBpp0070424		ENSG00000017260|ENST00000428331
FBpp0070426		ENSG00000017797|ENST00000383432
FBpp0070429		ENSG00000018610|ENST00000320339
FBpp0070449		ENSG00000019995|ENST00000359653
FBpp0070450		ENSG00000020426|ENST00000261245
FBpp0070451		ENSG00000023191|ENST00000397615
FBpp0070452		ENSG00000023287|ENST00000025008
FBpp0070453		ENSG00000023318|ENST00000262455
FBpp0070454		ENSG00000023572|ENST00000367440
FBpp0070459		ENSG00000023734|ENST00000419869
FBpp0070460		ENSG00000023909|ENST00000370238
FBpp0070465		ENSG00000024048|ENST00000372899
FBpp0070466		ENSG00000025770|ENST00000395698
FBpp0070472		ENSG00000025796|ENST00000369002
FBpp0070473		ENSG00000027697|ENST00000367739
FBpp0070475		ENSG00000027847|ENST00000029410
FBpp0070476		ENSG00000028116|ENST00000340157
FBpp0070518		ENSG00000028310|ENST00000467963
FBpp0070553		ENSG00000029363|ENST00000531224
FBpp0070554		ENSG00000029639|ENST00000367166
FBpp0070561		ENSG00000029725|ENST00000262477
FBpp0070562		ENSG00000031698|ENST00000234677
FBpp0070595		ENSG00000032444|ENST00000221249
FBpp0070597		ENSG00000033050|ENST00000222388
FBpp0070606		ENSG00000033800|ENST00000249636
FBpp0070607		ENSG00000035141|ENST00000037869
FBpp0070608		ENSG00000035928|ENST00000381897
FBpp0070609		ENSG00000036549|ENST00000370801
FBpp0070616		ENSG00000037474|ENST00000264670
FBpp0070620		ENSG00000037637|ENST00000375592
FBpp0070623		ENSG00000037749|ENST00000436816
FBpp0070636		ENSG00000037757|ENST00000319545
FBpp0070638		ENSG00000038274|ENST00000321757
FBpp0070639		ENSG00000038358|ENST00000358933
FBpp0070646		ENSG00000039123|ENST00000230640
FBpp0070650		ENSG00000040341|ENST00000355780
FBpp0070658		ENSG00000040487|ENST00000375155
FBpp0070666		ENSG00000040633|ENST00000320316
FBpp0070667		ENSG00000041357|ENST00000044462
FBpp0070716		ENSG00000041802|ENST00000265245
FBpp0070719		ENSG00000041988|ENST00000307896
FBpp0070720		ENSG00000042753|ENST00000263270
FBpp0070723		ENSG00000044574|ENST00000324460
FBpp0070749		ENSG00000046647|ENST00000380523
FBpp0070760		ENSG00000047249|ENST00000359530
FBpp0070761		ENSG00000047932|ENST00000368498
FBpp0070764		ENSG00000048140|ENST00000310032
FBpp0070765		ENSG00000048162|ENST00000510123
FBpp0070766		ENSG00000048544|ENST00000053468
FBpp0070767		ENSG00000048828|ENST00000277165
FBpp0070790		ENSG00000049245|ENST00000054666
FBpp0070791		ENSG00000049541|ENST00000352131
FBpp0070792		ENSG00000049656|ENST00000320895
FBpp0070795		ENSG00000050130|ENST00000261247
FBpp0070805		ENSG00000050393|ENST00000379170
FBpp0070808		ENSG00000050426|ENST00000262055
FBpp0070811		ENSG00000050748|ENST00000393360
FBpp0070812		ENSG00000051108|ENST00000439977
FBpp0070814		ENSG00000051382|ENST00000289153
FBpp0070815		ENSG00000052723|ENST00000369528
FBpp0070816		ENSG00000052841|ENST00000039989
FBpp0070817		ENSG00000053371|ENST00000235835
FBpp0070832		ENSG00000053501|ENST00000263897
FBpp0070842		ENSG00000054282|ENST00000366541
FBpp0070854		ENSG00000054611|ENST00000337137
FBpp0070859		ENSG00000055044|ENST00000264279
FBpp0070860		ENSG00000055070|ENST00000401088
FBpp0070861		ENSG00000055130|ENST00000325222
FBpp0070862		ENSG00000055208|ENST00000538427
FBpp0070863		ENSG00000055211|ENST00000367419
FBpp0070864		ENSG00000055917|ENST00000338086
FBpp0070870		ENSG00000055950|ENST00000318364
FBpp0070877		ENSG00000056097|ENST00000265069
FBpp0070878		ENSG00000056586|ENST00000423239
FBpp0070883		ENSG00000057663|ENST00000369076
FBpp0070886		ENSG00000057757|ENST00000246151
FBpp0070891		ENSG00000058600|ENST00000299853
FBpp0070906		ENSG00000058673|ENST00000367212
FBpp0070911		ENSG00000058673|ENST00000545588
FBpp0070913		ENSG00000058729|ENST00000283109
FBpp0070931		ENSG00000058799|ENST00000072644
FBpp0070951		ENSG00000060339|ENST00000265872
FBpp0070976		ENSG00000060491|ENST00000290291
FBpp0070977		ENSG00000060688|ENST00000263694
FBpp0070979		ENSG00000061794|ENST00000081029
FBpp0070992		ENSG00000061936|ENST00000261674
FBpp0070997		ENSG00000061987|ENST00000393632
FBpp0070998		ENSG00000062194|ENST00000424459
FBpp0071023		ENSG00000062582|ENST00000317534
FBpp0071024		ENSG00000062650|ENST00000298767
FBpp0071028		ENSG00000063241|ENST00000085068
FBpp0071033		ENSG00000063244|ENST00000450554
FBpp0071034		ENSG00000063245|ENST00000085079
FBpp0071052		ENSG00000063322|ENST00000315588
FBpp0071067		ENSG00000063601|ENST00000370390
FBpp0071068		ENSG00000063854|ENST00000397356
FBpp0071069		ENSG00000063978|ENST00000314289
FBpp0071077		ENSG00000064419|ENST00000393245
FBpp0071078		ENSG00000064490|ENST00000303088
FBpp0071083		ENSG00000064601|ENST00000372484
FBpp0071087		ENSG00000064933|ENST00000447232
FBpp0071088		ENSG00000064961|ENST00000333651
FBpp0071103		ENSG00000064995|ENST00000361288
FBpp0071108		ENSG00000065000|ENST00000345016
FBpp0071109		ENSG00000065029|ENST00000373953
FBpp0071115		ENSG00000065154|ENST00000368845
FBpp0071116		ENSG00000065183|ENST00000349139
FBpp0071117		ENSG00000065427|ENST00000302445
FBpp0071119		ENSG00000065518|ENST00000184266
FBpp0071123		ENSG00000065526|ENST00000375759
FBpp0071128		ENSG00000065802|ENST00000264607
FBpp0071129		ENSG00000065882|ENST00000261439
FBpp0071131		ENSG00000065883|ENST00000181839
FBpp0071140		ENSG00000066027|ENST00000261461
FBpp0071142		ENSG00000066044|ENST00000407627
FBpp0071164		ENSG00000066135|ENST00000372396
FBpp0071166		ENSG00000066136|ENST00000447388
FBpp0071168		ENSG00000066379|ENST00000359374
FBpp0071178		ENSG00000066422|ENST00000312938
FBpp0071189		ENSG00000066455|ENST00000163416
FBpp0071193		ENSG00000066557|ENST00000370952
FBpp0071218		ENSG00000066697|ENST00000395067
FBpp0071223		ENSG00000066739|ENST00000359933
FBpp0071240		ENSG00000066855|ENST00000262146
FBpp0071259		ENSG00000066926|ENST00000262093
FBpp0071261		ENSG00000067064|ENST00000381344
FBpp0071269		ENSG00000067221|ENST00000316900
FBpp0071277		ENSG00000067248|ENST00000251636
FBpp0071285		ENSG00000067334|ENST00000436063
FBpp0071293		ENSG00000067560|ENST00000418115
FBpp0071295		ENSG00000067596|ENST00000262415
FBpp0071298		ENSG00000067704|ENST00000302637
FBpp0071301		ENSG00000067829|ENST00000217901
FBpp0071302		ENSG00000068120|ENST00000393818
FBpp0071306		ENSG00000068305|ENST00000354410
FBpp0071381		ENSG00000068308|ENST00000156084
FBpp0071382		ENSG00000068323|ENST00000315869
FBpp0071385		ENSG00000068383|ENST00000368594
FBpp0071399		ENSG00000068394|ENST00000156109
FBpp0071416		ENSG00000068400|ENST00000376441
FBpp0071418		ENSG00000068438|ENST00000348411
FBpp0071420		ENSG00000068745|ENST00000431721
FBpp0071449		ENSG00000068793|ENST00000313077
FBpp0071451		ENSG00000068903|ENST00000249396
FBpp0071453		ENSG00000068912|ENST00000185150
FBpp0071455		ENSG00000068971|ENST00000164133
FBpp0071459		ENSG00000069248|ENST00000261396
FBpp0071462		ENSG00000069345|ENST00000317089
FBpp0071476		ENSG00000069956|ENST00000261845
FBpp0071477		ENSG00000069998|ENST00000155674
FBpp0071478		ENSG00000070010|ENST00000263202
FBpp0071491		ENSG00000070047|ENST00000264555
FBpp0071497		ENSG00000070423|ENST00000292363
FBpp0071502		ENSG00000070495|ENST00000397625
FBpp0071518		ENSG00000070614|ENST00000261797
FBpp0071519		ENSG00000070785|ENST00000360403
FBpp0071528		ENSG00000070831|ENST00000400259
FBpp0071529		ENSG00000071054|ENST00000413150
FBpp0071530		ENSG00000071082|ENST00000264258
FBpp0071542		ENSG00000071127|ENST00000382451
FBpp0071544		ENSG00000071189|ENST00000428135
FBpp0071555		ENSG00000071462|ENST00000265758
FBpp0071556		ENSG00000071537|ENST00000336735
FBpp0071560		ENSG00000071626|ENST00000233078
FBpp0071561		ENSG00000071994|ENST00000541970
FBpp0071575		ENSG00000072062|ENST00000308677
FBpp0071583		ENSG00000072210|ENST00000579855
FBpp0071587		ENSG00000072501|ENST00000322213
FBpp0071593		ENSG00000072506|ENST00000168216
FBpp0071594		ENSG00000072778|ENST00000356839
FBpp0071596		ENSG00000072803|ENST00000265094
FBpp0071600		ENSG00000072849|ENST00000158771
FBpp0071603		ENSG00000072958|ENST00000291439
FBpp0071616		ENSG00000073169|ENST00000380903
FBpp0071617		ENSG00000073584|ENST00000348513
FBpp0071623		ENSG00000073921|ENST00000526033
FBpp0071624		ENSG00000074071|ENST00000397375
FBpp0071628		ENSG00000074201|ENST00000525428
FBpp0071629		ENSG00000074266|ENST00000263360
FBpp0071630		ENSG00000074319|ENST00000251968
FBpp0071642		ENSG00000074582|ENST00000392109
FBpp0071681		ENSG00000074695|ENST00000251047
FBpp0071700		ENSG00000074964|ENST00000361221
FBpp0071713		ENSG00000075151|ENST00000264211
FBpp0071738		ENSG00000075240|ENST00000361034
FBpp0071744		ENSG00000075292|ENST00000264447
FBpp0071745		ENSG00000075336|ENST00000169551
FBpp0071749		ENSG00000075407|ENST00000361085
FBpp0071753		ENSG00000075413|ENST00000303622
FBpp0071771		ENSG00000075415|ENST00000188376
FBpp0071794		ENSG00000075711|ENST00000346964
FBpp0071808		ENSG00000075785|ENST00000265062
FBpp0071815		ENSG00000075790|ENST00000005259
FBpp0071816		ENSG00000075856|ENST00000228284
FBpp0071821		ENSG00000075914|ENST00000265564
FBpp0071822		ENSG00000075975|ENST00000170447
FBpp0071824		ENSG00000076053|ENST00000375490
FBpp0071825		ENSG00000076201|ENST00000265562
FBpp0071848		ENSG00000076242|ENST00000231790
FBpp0071849		ENSG00000076248|ENST00000336865
FBpp0071894		ENSG00000076321|ENST00000209884
FBpp0071905		ENSG00000077147|ENST00000371142
FBpp0071919		ENSG00000077232|ENST00000264065
FBpp0071922		ENSG00000077254|ENST00000370793
FBpp0071923		ENSG00000077312|ENST00000243563
FBpp0071924		ENSG00000077463|ENST00000305232
FBpp0071937		ENSG00000077721|ENST00000371558
FBpp0071938		ENSG00000078061|ENST00000377039
FBpp0071939		ENSG00000078070|ENST00000265594
FBpp0071940		ENSG00000078140|ENST00000261427
FBpp0071942		ENSG00000078142|ENST00000262039
FBpp0071943		ENSG00000078237|ENST00000179259
FBpp0071945		ENSG00000078304|ENST00000334743
FBpp0071946		ENSG00000078369|ENST00000378609
FBpp0071947		ENSG00000078403|ENST00000377100
FBpp0071969		ENSG00000078668|ENST00000392935
FBpp0071973		ENSG00000078674|ENST00000325083
FBpp0071975		ENSG00000078747|ENST00000374864
FBpp0071976		ENSG00000078808|ENST00000263741
FBpp0071977		ENSG00000078902|ENST00000317204
FBpp0071978		ENSG00000078967|ENST00000222402
FBpp0071979		ENSG00000079246|ENST00000392132
FBpp0071992		ENSG00000079277|ENST00000371946
FBpp0071993		ENSG00000079313|ENST00000170168
FBpp0071994		ENSG00000079332|ENST00000373241
FBpp0072000		ENSG00000079432|ENST00000575354
FBpp0072005		ENSG00000079459|ENST00000220584
FBpp0072006		ENSG00000079785|ENST00000233084
FBpp0072007		ENSG00000079805|ENST00000359692
FBpp0072020		ENSG00000080371|ENST00000261263
FBpp0072021		ENSG00000080503|ENST00000349721
FBpp0072022		ENSG00000080802|ENST00000423368
FBpp0072023		ENSG00000080815|ENST00000324501
FBpp0072029		ENSG00000080845|ENST00000340491
FBpp0072037		ENSG00000081087|ENST00000193322
FBpp0072041		ENSG00000081177|ENST00000409675
FBpp0072050		ENSG00000081307|ENST00000356232
FBpp0072051		ENSG00000081692|ENST00000366758
FBpp0072052		ENSG00000082153|ENST00000409600
FBpp0072053		ENSG00000082212|ENST00000321341
FBpp0072056		ENSG00000082515|ENST00000523037
FBpp0072060		ENSG00000082701|ENST00000264235
FBpp0072074		ENSG00000082898|ENST00000401558
FBpp0072077		ENSG00000082996|ENST00000344229
FBpp0072088		ENSG00000083312|ENST00000337273
FBpp0072097		ENSG00000083444|ENST00000196061
FBpp0072098		ENSG00000083520|ENST00000377767
FBpp0072099		ENSG00000083544|ENST00000196169
FBpp0072100		ENSG00000083838|ENST00000594369
FBpp0072101		ENSG00000083845|ENST00000196551
FBpp0072111		ENSG00000083896|ENST00000355665
FBpp0072112		ENSG00000083937|ENST00000263780
FBpp0072116		ENSG00000084072|ENST00000324379
FBpp0072117		ENSG00000084073|ENST00000372759
FBpp0072119		ENSG00000084090|ENST00000337288
FBpp0072128		ENSG00000084092|ENST00000264230
FBpp0072129		ENSG00000084093|ENST00000309042
FBpp0072132		ENSG00000084463|ENST00000261167
FBpp0072134		ENSG00000084623|ENST00000373586
FBpp0072136		ENSG00000084652|ENST00000373610
FBpp0072158		ENSG00000084676|ENST00000348332
FBpp0072162		ENSG00000084733|ENST00000264710
FBpp0072164		ENSG00000084754|ENST00000380649
FBpp0072166		ENSG00000085117|ENST00000227155
FBpp0072167		ENSG00000085231|ENST00000217893
FBpp0072168		ENSG00000085274|ENST00000349841
FBpp0072169		ENSG00000085377|ENST00000369110
FBpp0072178		ENSG00000085415|ENST00000262124
FBpp0072184		ENSG00000085721|ENST00000198767
FBpp0072188		ENSG00000085733|ENST00000301843
FBpp0072189		ENSG00000085872|ENST00000546361
FBpp0072192		ENSG00000085978|ENST00000392020
FBpp0072210		ENSG00000085998|ENST00000371984
FBpp0072211		ENSG00000086065|ENST00000223500
FBpp0072216		ENSG00000086102|ENST00000379540
FBpp0072222		ENSG00000086189|ENST00000199320
FBpp0072230		ENSG00000086232|ENST00000199389
FBpp0072231		ENSG00000086475|ENST00000327347
FBpp0072232		ENSG00000086504|ENST00000199706
FBpp0072233		ENSG00000086544|ENST00000263370
FBpp0072234		ENSG00000086598|ENST00000262225
FBpp0072235		ENSG00000086666|ENST00000261749
FBpp0072239		ENSG00000086712|ENST00000380122
FBpp0072245		ENSG00000086758|ENST00000262854
FBpp0072246		ENSG00000086827|ENST00000200135
FBpp0072247		ENSG00000086848|ENST00000531154
FBpp0072250		ENSG00000087008|ENST00000356406
FBpp0072253		ENSG00000087111|ENST00000308360
FBpp0072281		ENSG00000087191|ENST00000310144
FBpp0072282		ENSG00000087263|ENST00000566157
FBpp0072304		ENSG00000087269|ENST00000314262
FBpp0072305		ENSG00000087302|ENST00000261700
FBpp0072306		ENSG00000087365|ENST00000322535
FBpp0072330		ENSG00000087470|ENST00000266481
FBpp0072333		ENSG00000087502|ENST00000360150
FBpp0072334		ENSG00000087995|ENST00000311506
FBpp0072342		ENSG00000088038|ENST00000221232
FBpp0072386		ENSG00000088205|ENST00000263239
FBpp0072404		ENSG00000088247|ENST00000398148
FBpp0072415		ENSG00000088448|ENST00000267339
FBpp0072416		ENSG00000088766|ENST00000378863
FBpp0072417		ENSG00000088812|ENST00000262919
FBpp0072420		ENSG00000088833|ENST00000216879
FBpp0072421		ENSG00000088876|ENST00000278772
FBpp0072422		ENSG00000089006|ENST00000377759
FBpp0072447		ENSG00000089009|ENST00000202773
FBpp0072448		ENSG00000089022|ENST00000550735
FBpp0072449		ENSG00000089063|ENST00000379299
FBpp0072453		ENSG00000089220|ENST00000261313
FBpp0072463		ENSG00000089486|ENST00000567695
FBpp0072468		ENSG00000089597|ENST00000356638
FBpp0072475		ENSG00000089682|ENST00000372479
FBpp0072476		ENSG00000089693|ENST00000435120
FBpp0072480		ENSG00000089737|ENST00000330836
FBpp0072481		ENSG00000089775|ENST00000608382
FBpp0072486		ENSG00000089818|ENST00000339754
FBpp0072493		ENSG00000089876|ENST00000284690
FBpp0072557		ENSG00000090060|ENST00000216277
FBpp0072563		ENSG00000090061|ENST00000389879
FBpp0072564		ENSG00000090263|ENST00000393008
FBpp0072605		ENSG00000090266|ENST00000247866
FBpp0072606		ENSG00000090273|ENST00000321265
FBpp0072613		ENSG00000090316|ENST00000264750
FBpp0072628		ENSG00000090432|ENST00000264198
FBpp0072629		ENSG00000090520|ENST00000265028
FBpp0072630		ENSG00000090581|ENST00000204679
FBpp0072640		ENSG00000090615|ENST00000204726
FBpp0072646		ENSG00000090674|ENST00000264079
FBpp0072650		ENSG00000090861|ENST00000261772
FBpp0072651		ENSG00000090863|ENST00000205061
FBpp0072652		ENSG00000091009|ENST00000265271
FBpp0072653		ENSG00000091140|ENST00000205402
FBpp0072654		ENSG00000091164|ENST00000217515
FBpp0072659		ENSG00000091542|ENST00000399138
FBpp0072662		ENSG00000091640|ENST00000206020
FBpp0072664		ENSG00000091947|ENST00000206380
FBpp0072671		ENSG00000092036|ENST00000541587
FBpp0072674		ENSG00000092094|ENST00000206542
FBpp0072680		ENSG00000092098|ENST00000324103
FBpp0072681		ENSG00000092108|ENST00000458591
FBpp0072695		ENSG00000092203|ENST00000262709
FBpp0072696		ENSG00000092531|ENST00000249647
FBpp0072705		ENSG00000092931|ENST00000336509
FBpp0072706		ENSG00000093010|ENST00000361682
FBpp0072707		ENSG00000093144|ENST00000454859
FBpp0072721		ENSG00000093167|ENST00000354379
FBpp0072735		ENSG00000093183|ENST00000273156
FBpp0072736		ENSG00000094631|ENST00000376619
FBpp0072746		ENSG00000094880|ENST00000394886
FBpp0072756		ENSG00000094916|ENST00000209875
FBpp0072767		ENSG00000095059|ENST00000210060
FBpp0072768		ENSG00000095139|ENST00000264028
FBpp0072777		ENSG00000095380|ENST00000210444
FBpp0072779		ENSG00000095574|ENST00000368886
FBpp0072781		ENSG00000095787|ENST00000354911
FBpp0072783		ENSG00000095906|ENST00000262302
FBpp0072784		ENSG00000095951|ENST00000379388
FBpp0072785		ENSG00000096070|ENST00000357641
FBpp0072786		ENSG00000096080|ENST00000372133
FBpp0072787		ENSG00000096401|ENST00000371477
FBpp0072788		ENSG00000097033|ENST00000370558
FBpp0072803		ENSG00000099203|ENST00000214869
FBpp0072804		ENSG00000099246|ENST00000356940
FBpp0072830		ENSG00000099326|ENST00000599369
FBpp0072840		ENSG00000099341|ENST00000215071
FBpp0072842		ENSG00000099785|ENST00000393944
FBpp0072843		ENSG00000099795|ENST00000215565
FBpp0072857		ENSG00000099797|ENST00000215567
FBpp0072858		ENSG00000099800|ENST00000215570
FBpp0072885		ENSG00000099817|ENST00000586746
FBpp0072886		ENSG00000099899|ENST00000252136
FBpp0072891		ENSG00000099904|ENST00000334554
FBpp0072892		ENSG00000099940|ENST00000215730
FBpp0072894		ENSG00000099942|ENST00000354336
FBpp0072895		ENSG00000099949|ENST00000215739
FBpp0072896		ENSG00000099956|ENST00000263121
FBpp0072899		ENSG00000099968|ENST00000317582
FBpp0072900		ENSG00000099995|ENST00000215793
FBpp0072908		ENSG00000100014|ENST00000314328
FBpp0072909		ENSG00000100028|ENST00000215829
FBpp0072910		ENSG00000100029|ENST00000354694
FBpp0072937		ENSG00000100030|ENST00000215832
FBpp0072940		ENSG00000100056|ENST00000252137
FBpp0072941		ENSG00000100101|ENST00000359114
FBpp0072944		ENSG00000100104|ENST00000215917
FBpp0072955		ENSG00000100105|ENST00000266269
FBpp0072956		ENSG00000100109|ENST00000407690
FBpp0072975		ENSG00000100129|ENST00000412331
FBpp0072977		ENSG00000100138|ENST00000401959
FBpp0072978		ENSG00000100139|ENST00000215957
FBpp0072979		ENSG00000100142|ENST00000442738
FBpp0072980		ENSG00000100151|ENST00000356976
FBpp0072981		ENSG00000100201|ENST00000396821
FBpp0072982		ENSG00000100207|ENST00000359486
FBpp0072990		ENSG00000100220|ENST00000216038
FBpp0072991		ENSG00000100225|ENST00000266087
FBpp0072992		ENSG00000100239|ENST00000359139
FBpp0072993		ENSG00000100242|ENST00000216064
FBpp0072994		ENSG00000100243|ENST00000352397
FBpp0073007		ENSG00000100258|ENST00000474879
FBpp0073008		ENSG00000100266|ENST00000403744
FBpp0073009		ENSG00000100280|ENST00000357586
FBpp0073010		ENSG00000100281|ENST00000216106
FBpp0073011		ENSG00000100288|ENST00000406938
FBpp0073016		ENSG00000100296|ENST00000490103
FBpp0073017		ENSG00000100319|ENST00000397781
FBpp0073036		ENSG00000100324|ENST00000216160
FBpp0073040		ENSG00000100330|ENST00000401950
FBpp0073049		ENSG00000100335|ENST00000325301
FBpp0073085		ENSG00000100348|ENST00000416967
FBpp0073090		ENSG00000100353|ENST00000216190
FBpp0073098		ENSG00000100359|ENST00000248929
FBpp0073100		ENSG00000100360|ENST00000340630
FBpp0073101		ENSG00000100387|ENST00000216225
FBpp0073102		ENSG00000100395|ENST00000216237
FBpp0073103		ENSG00000100401|ENST00000356244
FBpp0073112		ENSG00000100403|ENST00000352645
FBpp0073144		ENSG00000100410|ENST00000216252
FBpp0073149		ENSG00000100418|ENST00000263256
FBpp0073177		ENSG00000100426|ENST00000216268
FBpp0073191		ENSG00000100439|ENST00000428304
FBpp0073195		ENSG00000100441|ENST00000553935
FBpp0073204		ENSG00000100442|ENST00000396062
FBpp0073215		ENSG00000100445|ENST00000399395
FBpp0073236		ENSG00000100461|ENST00000399922
FBpp0073237		ENSG00000100462|ENST00000324366
FBpp0073259		ENSG00000100519|ENST00000606149
FBpp0073262		ENSG00000100528|ENST00000216416
FBpp0073266		ENSG00000100554|ENST00000216442
FBpp0073277		ENSG00000100568|ENST00000554659
FBpp0073278		ENSG00000100575|ENST00000395159
FBpp0073279		ENSG00000100591|ENST00000216479
FBpp0073280		ENSG00000100603|ENST00000261531
FBpp0073290		ENSG00000100605|ENST00000556603
FBpp0073291		ENSG00000100614|ENST00000395076
FBpp0073293		ENSG00000100632|ENST00000557016
FBpp0073304		ENSG00000100664|ENST00000216554
FBpp0073307		ENSG00000100731|ENST00000304743
FBpp0073308		ENSG00000100796|ENST00000337238
FBpp0073316		ENSG00000100804|ENST00000361611
FBpp0073327		ENSG00000100811|ENST00000262238
FBpp0073328		ENSG00000100813|ENST00000262710
FBpp0073369		ENSG00000100814|ENST00000358932
FBpp0073371		ENSG00000100836|ENST00000216727
FBpp0073372		ENSG00000100852|ENST00000432921
FBpp0073397		ENSG00000100865|ENST00000216756
FBpp0073398		ENSG00000100883|ENST00000216774
FBpp0073403		ENSG00000100888|ENST00000430710
FBpp0073405		ENSG00000100890|ENST00000250377
FBpp0073406		ENSG00000100897|ENST00000446197
FBpp0073411		ENSG00000100902|ENST00000261479
FBpp0073416		ENSG00000100926|ENST00000261789
FBpp0073437		ENSG00000100934|ENST00000307712
FBpp0073438		ENSG00000100941|ENST00000216832
FBpp0073441		ENSG00000100949|ENST00000399409
FBpp0073457		ENSG00000100982|ENST00000372409
FBpp0073458		ENSG00000100997|ENST00000376542
FBpp0073459		ENSG00000101084|ENST00000344795
FBpp0073474		ENSG00000101126|ENST00000396029
FBpp0073475		ENSG00000101132|ENST00000371419
FBpp0073491		ENSG00000101138|ENST00000217109
FBpp0073495		ENSG00000101152|ENST00000360864
FBpp0073508		ENSG00000101158|ENST00000602795
FBpp0073513		ENSG00000101161|ENST00000266079
FBpp0073515		ENSG00000101166|ENST00000355937
FBpp0073524		ENSG00000101181|ENST00000370823
FBpp0073526		ENSG00000101182|ENST00000370873
FBpp0073528		ENSG00000101191|ENST00000370371
FBpp0073529		ENSG00000101246|ENST00000440854
FBpp0073530		ENSG00000101290|ENST00000460006
FBpp0073551		ENSG00000101337|ENST00000398022
FBpp0073554		ENSG00000101343|ENST00000377340
FBpp0073572		ENSG00000101361|ENST00000329276
FBpp0073588		ENSG00000101365|ENST00000380843
FBpp0073594		ENSG00000101391|ENST00000473997
FBpp0073595		ENSG00000101407|ENST00000373448
FBpp0073597		ENSG00000101413|ENST00000373433
FBpp0073610		ENSG00000101421|ENST00000217402
FBpp0073620		ENSG00000101442|ENST00000243903
FBpp0073623		ENSG00000101444|ENST00000217426
FBpp0073624		ENSG00000101457|ENST00000372622
FBpp0073625		ENSG00000101464|ENST00000217446
FBpp0073626		ENSG00000101557|ENST00000261601
FBpp0073627		ENSG00000101558|ENST00000400000
FBpp0073637		ENSG00000101752|ENST00000261537
FBpp0073639		ENSG00000101782|ENST00000339486
FBpp0073649		ENSG00000101843|ENST00000217958
FBpp0073651		ENSG00000101882|ENST00000371410
FBpp0073664		ENSG00000101940|ENST00000218056
FBpp0073666		ENSG00000101966|ENST00000371199
FBpp0073672		ENSG00000101997|ENST00000376227
FBpp0073673		ENSG00000102030|ENST00000464845
FBpp0073675		ENSG00000102054|ENST00000404022
FBpp0073676		ENSG00000102069|ENST00000370494
FBpp0073716		ENSG00000102100|ENST00000247138
FBpp0073717		ENSG00000102103|ENST00000218224
FBpp0073718		ENSG00000102119|ENST00000369842
FBpp0073719		ENSG00000102144|ENST00000373316
FBpp0073747		ENSG00000102178|ENST00000369660
FBpp0073749		ENSG00000102181|ENST00000370377
FBpp0073762		ENSG00000102225|ENST00000357227
FBpp0073763		ENSG00000102531|ENST00000398316
FBpp0073764		ENSG00000102580|ENST00000602402
FBpp0073777		ENSG00000102738|ENST00000323563
FBpp0073781		ENSG00000102796|ENST00000218981
FBpp0073782		ENSG00000102858|ENST00000262370
FBpp0073783		ENSG00000102893|ENST00000323584
FBpp0073805		ENSG00000102897|ENST00000439021
FBpp0073818		ENSG00000102898|ENST00000219169
FBpp0073819		ENSG00000102901|ENST00000562787
FBpp0073822		ENSG00000102910|ENST00000285737
FBpp0073823		ENSG00000102921|ENST00000262384
FBpp0073828		ENSG00000102974|ENST00000264010
FBpp0073844		ENSG00000102978|ENST00000219252
FBpp0073847		ENSG00000103018|ENST00000307892
FBpp0073849		ENSG00000103024|ENST00000219302
FBpp0073850		ENSG00000103035|ENST00000219313
FBpp0073851		ENSG00000103037|ENST00000310682
FBpp0073853		ENSG00000103043|ENST00000261776
FBpp0073869		ENSG00000103047|ENST00000261778
FBpp0073872		ENSG00000103051|ENST00000323786
FBpp0073873		ENSG00000103091|ENST00000262144
FBpp0073874		ENSG00000103126|ENST00000262320
FBpp0073875		ENSG00000103194|ENST00000219473
FBpp0073891		ENSG00000103197|ENST00000219476
FBpp0073901		ENSG00000103245|ENST00000251588
FBpp0073903		ENSG00000103249|ENST00000382745
FBpp0073906		ENSG00000103254|ENST00000569529
FBpp0073910		ENSG00000103266|ENST00000219548
FBpp0073919		ENSG00000103274|ENST00000283027
FBpp0073920		ENSG00000103342|ENST00000434724
FBpp0073921		ENSG00000103353|ENST00000395878
FBpp0073928		ENSG00000103356|ENST00000449606
FBpp0073929		ENSG00000103363|ENST00000409906
FBpp0073937		ENSG00000103415|ENST00000570646
FBpp0073943		ENSG00000103423|ENST00000262375
FBpp0073945		ENSG00000103429|ENST00000261658
FBpp0073946		ENSG00000103496|ENST00000313843
FBpp0073975		ENSG00000103502|ENST00000219789
FBpp0073976		ENSG00000103507|ENST00000219794
FBpp0073979		ENSG00000103510|ENST00000219797
FBpp0073981		ENSG00000103544|ENST00000438132
FBpp0073988		ENSG00000103549|ENST00000324685
FBpp0073989		ENSG00000103591|ENST00000261880
FBpp0073990		ENSG00000103769|ENST00000261890
FBpp0073991		ENSG00000103978|ENST00000307216
FBpp0073993		ENSG00000104047|ENST00000251250
FBpp0073995		ENSG00000104064|ENST00000429662
FBpp0074009		ENSG00000104129|ENST00000220496
FBpp0074016		ENSG00000104133|ENST00000261866
FBpp0074017		ENSG00000104142|ENST00000220509
FBpp0074024		ENSG00000104164|ENST00000220531
FBpp0074025		ENSG00000104219|ENST00000262096
FBpp0074026		ENSG00000104221|ENST00000220659
FBpp0074052		ENSG00000104231|ENST00000220669
FBpp0074054		ENSG00000104343|ENST00000517608
FBpp0074059		ENSG00000104388|ENST00000262646
FBpp0074060		ENSG00000104408|ENST00000220849
FBpp0074061		ENSG00000104412|ENST00000220853
FBpp0074075		ENSG00000104472|ENST00000220913
FBpp0074077		ENSG00000104522|ENST00000425753
FBpp0074078		ENSG00000104613|ENST00000397977
FBpp0074089		ENSG00000104671|ENST00000221114
FBpp0074104		ENSG00000104679|ENST00000265806
FBpp0074129		ENSG00000104687|ENST00000221130
FBpp0074130		ENSG00000104695|ENST00000221138
FBpp0074150		ENSG00000104714|ENST00000262109
FBpp0074151		ENSG00000104805|ENST00000405315
FBpp0074162		ENSG00000104823|ENST00000221418
FBpp0074178		ENSG00000104852|ENST00000221448
FBpp0074180		ENSG00000104853|ENST00000337392
FBpp0074186		ENSG00000104866|ENST00000221462
FBpp0074189		ENSG00000104872|ENST00000262265
FBpp0074199		ENSG00000104886|ENST00000326631
FBpp0074201		ENSG00000104904|ENST00000602676
FBpp0074202		ENSG00000104907|ENST00000437766
FBpp0074213		ENSG00000104915|ENST00000587230
FBpp0074214		ENSG00000104957|ENST00000221554
FBpp0074221		ENSG00000104960|ENST00000391842
FBpp0074225		ENSG00000104964|ENST00000327141
FBpp0074237		ENSG00000104969|ENST00000221566
FBpp0074239		ENSG00000105053|ENST00000316763
FBpp0074241		ENSG00000105127|ENST00000269701
FBpp0074242		ENSG00000105135|ENST00000263383
FBpp0074243		ENSG00000105136|ENST00000424930
FBpp0074244		ENSG00000105171|ENST00000586420
FBpp0074245		ENSG00000105176|ENST00000392271
FBpp0074246		ENSG00000105185|ENST00000590247
FBpp0074247		ENSG00000105197|ENST00000314349
FBpp0074249		ENSG00000105223|ENST00000409735
FBpp0074250		ENSG00000105254|ENST00000221855
FBpp0074260		ENSG00000105258|ENST00000221859
FBpp0074284		ENSG00000105323|ENST00000392006
FBpp0074288		ENSG00000105325|ENST00000441788
FBpp0074348		ENSG00000105341|ENST00000221943
FBpp0074365		ENSG00000105364|ENST00000253099
FBpp0074373		ENSG00000105379|ENST00000309244
FBpp0074383		ENSG00000105393|ENST00000601043
FBpp0074384		ENSG00000105397|ENST00000525621
FBpp0074385		ENSG00000105401|ENST00000222005
FBpp0074387		ENSG00000105402|ENST00000263354
FBpp0074395		ENSG00000105447|ENST00000253237
FBpp0074396		ENSG00000105520|ENST00000251473
FBpp0074405		ENSG00000105552|ENST00000316273
FBpp0074410		ENSG00000105568|ENST00000322088
FBpp0074414		ENSG00000105583|ENST00000596731
FBpp0074418		ENSG00000105607|ENST00000222214
FBpp0074442		ENSG00000105612|ENST00000222219
FBpp0074448		ENSG00000105617|ENST00000222224
FBpp0074449		ENSG00000105618|ENST00000321030
FBpp0074455		ENSG00000105619|ENST00000391759
FBpp0074457		ENSG00000105671|ENST00000247003
FBpp0074458		ENSG00000105676|ENST00000392335
FBpp0074462		ENSG00000105677|ENST00000222284
FBpp0074465		ENSG00000105698|ENST00000222305
FBpp0074480		ENSG00000105700|ENST00000222307
FBpp0074481		ENSG00000105701|ENST00000597960
FBpp0074482		ENSG00000105705|ENST00000247001
FBpp0074483		ENSG00000105723|ENST00000222330
FBpp0074484		ENSG00000105732|ENST00000359044
FBpp0074485		ENSG00000105793|ENST00000222511
FBpp0074486		ENSG00000105819|ENST00000249269
FBpp0074487		ENSG00000105821|ENST00000379263
FBpp0074488		ENSG00000105856|ENST00000222574
FBpp0074489		ENSG00000105887|ENST00000393085
FBpp0074496		ENSG00000105968|ENST00000308153
FBpp0074497		ENSG00000106009|ENST00000340611
FBpp0074509		ENSG00000106049|ENST00000265395
FBpp0074512		ENSG00000106052|ENST00000396319
FBpp0074513		ENSG00000106105|ENST00000389266
FBpp0074514		ENSG00000106244|ENST00000350498
FBpp0074519		ENSG00000106246|ENST00000292478
FBpp0074520		ENSG00000106246|ENST00000555673
FBpp0074522		ENSG00000106261|ENST00000324306
FBpp0074525		ENSG00000106344|ENST00000223073
FBpp0074532		ENSG00000106355|ENST00000450169
FBpp0074544		ENSG00000106397|ENST00000223127
FBpp0074545		ENSG00000106399|ENST00000223129
FBpp0074546		ENSG00000106400|ENST00000305105
FBpp0074549		ENSG00000106460|ENST00000396667
FBpp0074552		ENSG00000106554|ENST00000262570
FBpp0074555		ENSG00000106588|ENST00000223321
FBpp0074567		ENSG00000106591|ENST00000223324
FBpp0074568		ENSG00000106603|ENST00000223336
FBpp0074583		ENSG00000106608|ENST00000426198
FBpp0074588		ENSG00000106628|ENST00000452185
FBpp0074608		ENSG00000106635|ENST00000223368
FBpp0074609		ENSG00000106636|ENST00000223369
FBpp0074616		ENSG00000106733|ENST00000361092
FBpp0074650		ENSG00000106803|ENST00000223641
FBpp0074651		ENSG00000107020|ENST00000223864
FBpp0074654		ENSG00000107185|ENST00000378078
FBpp0074655		ENSG00000107262|ENST00000472232
FBpp0074656		ENSG00000107263|ENST00000372189
FBpp0074657		ENSG00000107341|ENST00000263228
FBpp0074658		ENSG00000107362|ENST00000377041
FBpp0074660		ENSG00000107372|ENST00000237937
FBpp0074661		ENSG00000107521|ENST00000325103
FBpp0074663		ENSG00000107581|ENST00000369144
FBpp0074665		ENSG00000107643|ENST00000374182
FBpp0074669		ENSG00000107651|ENST00000369075
FBpp0074670		ENSG00000107679|ENST00000433307
FBpp0074671		ENSG00000107745|ENST00000361114
FBpp0074673		ENSG00000107815|ENST00000311916
FBpp0074684		ENSG00000107829|ENST00000331272
FBpp0074685		ENSG00000107854|ENST00000371627
FBpp0074686		ENSG00000107862|ENST00000369983
FBpp0074688		ENSG00000107872|ENST00000224862
FBpp0074689		ENSG00000107874|ENST00000369937
FBpp0074690		ENSG00000107937|ENST00000360803
FBpp0074691		ENSG00000107949|ENST00000368759
FBpp0074707		ENSG00000107951|ENST00000263063
FBpp0074708		ENSG00000107959|ENST00000380989
FBpp0074709		ENSG00000107960|ENST00000224950
FBpp0074714		ENSG00000108010|ENST00000331244
FBpp0074715		ENSG00000108021|ENST00000328090
FBpp0074730		ENSG00000108039|ENST00000369680
FBpp0074735		ENSG00000108061|ENST00000369452
FBpp0074740		ENSG00000108064|ENST00000487519
FBpp0074742		ENSG00000108100|ENST00000374704
FBpp0074786		ENSG00000108179|ENST00000225174
FBpp0074787		ENSG00000108270|ENST00000225402
FBpp0074788		ENSG00000108278|ENST00000225410
FBpp0074789		ENSG00000108294|ENST00000225426
FBpp0074793		ENSG00000108296|ENST00000225428
FBpp0074801		ENSG00000108312|ENST00000436088
FBpp0074818		ENSG00000108344|ENST00000264639
FBpp0074822		ENSG00000108349|ENST00000264645
FBpp0074830		ENSG00000108384|ENST00000421782
FBpp0074834		ENSG00000108423|ENST00000340993
FBpp0074842		ENSG00000108424|ENST00000290158
FBpp0074865		ENSG00000108439|ENST00000225573
FBpp0074887		ENSG00000108443|ENST00000225577
FBpp0074888		ENSG00000108509|ENST00000348066
FBpp0074907		ENSG00000108510|ENST00000397786
FBpp0074926		ENSG00000108523|ENST00000262482
FBpp0074937		ENSG00000108528|ENST00000225665
FBpp0074941		ENSG00000108587|ENST00000225724
FBpp0074963		ENSG00000108588|ENST00000225726
FBpp0074977		ENSG00000108590|ENST00000225728
FBpp0074982		ENSG00000108591|ENST00000225729
FBpp0074989		ENSG00000108592|ENST00000427159
FBpp0074991		ENSG00000108651|ENST00000261708
FBpp0074992		ENSG00000108671|ENST00000261712
FBpp0075023		ENSG00000108774|ENST00000346213
FBpp0075024		ENSG00000108788|ENST00000246912
FBpp0075026		ENSG00000108826|ENST00000225969
FBpp0075027		ENSG00000108829|ENST00000225972
FBpp0075028		ENSG00000108848|ENST00000240304
FBpp0075029		ENSG00000108883|ENST00000426333
FBpp0075034		ENSG00000108946|ENST00000589228
FBpp0075046		ENSG00000108961|ENST00000226105
FBpp0075053		ENSG00000108963|ENST00000263083
FBpp0075054		ENSG00000109016|ENST00000395511
FBpp0075055		ENSG00000109079|ENST00000226225
FBpp0075068		ENSG00000109111|ENST00000314616
FBpp0075069		ENSG00000109118|ENST00000268756
FBpp0075073		ENSG00000109133|ENST00000504986
FBpp0075074		ENSG00000109184|ENST00000381441
FBpp0075083		ENSG00000109332|ENST00000394801
FBpp0075084		ENSG00000109381|ENST00000358635
FBpp0075087		ENSG00000109390|ENST00000505036
FBpp0075096		ENSG00000109445|ENST00000262990
FBpp0075104		ENSG00000109475|ENST00000394667
FBpp0075106		ENSG00000109519|ENST00000264954
FBpp0075109		ENSG00000109572|ENST00000513761
FBpp0075118		ENSG00000109606|ENST00000336812
FBpp0075119		ENSG00000109756|ENST00000264431
FBpp0075120		ENSG00000109762|ENST00000264694
FBpp0075122		ENSG00000109787|ENST00000261438
FBpp0075138		ENSG00000109790|ENST00000504108
FBpp0075139		ENSG00000109854|ENST00000421577
FBpp0075170		ENSG00000109911|ENST00000350638
FBpp0075171		ENSG00000109917|ENST00000227322
FBpp0075181		ENSG00000109971|ENST00000534624
FBpp0075186		ENSG00000110011|ENST00000321685
FBpp0075205		ENSG00000110046|ENST00000377264
FBpp0075206		ENSG00000110048|ENST00000263847
FBpp0075207		ENSG00000110060|ENST00000227474
FBpp0075209		ENSG00000110066|ENST00000401547
FBpp0075238		ENSG00000110074|ENST00000263578
FBpp0075239		ENSG00000110075|ENST00000265636
FBpp0075250		ENSG00000110104|ENST00000227520
FBpp0075253		ENSG00000110107|ENST00000227524
FBpp0075267		ENSG00000110171|ENST00000359518
FBpp0075273		ENSG00000110315|ENST00000265981
FBpp0075274		ENSG00000110321|ENST00000339995
FBpp0075275		ENSG00000110330|ENST00000227758
FBpp0075276		ENSG00000110344|ENST00000252108
FBpp0075291		ENSG00000110429|ENST00000265651
FBpp0075292		ENSG00000110435|ENST00000448838
FBpp0075293		ENSG00000110442|ENST00000263401
FBpp0075294		ENSG00000110536|ENST00000326674
FBpp0075302		ENSG00000110619|ENST00000278224
FBpp0075317		ENSG00000110651|ENST00000263645
FBpp0075318		ENSG00000110711|ENST00000279146
FBpp0075319		ENSG00000110717|ENST00000313468
FBpp0075320		ENSG00000110768|ENST00000265963
FBpp0075321		ENSG00000110801|ENST00000261817
FBpp0075322		ENSG00000110851|ENST00000228437
FBpp0075344		ENSG00000110955|ENST00000262030
FBpp0075345		ENSG00000110958|ENST00000262033
FBpp0075349		ENSG00000111011|ENST00000331738
FBpp0075377		ENSG00000111142|ENST00000323666
FBpp0075396		ENSG00000111231|ENST00000228827
FBpp0075398		ENSG00000111237|ENST00000549578
FBpp0075401		ENSG00000111266|ENST00000228862
FBpp0075425		ENSG00000111328|ENST00000261692
FBpp0075441		ENSG00000111445|ENST00000454402
FBpp0075448		ENSG00000111481|ENST00000262061
FBpp0075449		ENSG00000111540|ENST00000360299
FBpp0075461		ENSG00000111581|ENST00000229179
FBpp0075462		ENSG00000111596|ENST00000229195
FBpp0075498		ENSG00000111605|ENST00000435070
FBpp0075501		ENSG00000111615|ENST00000229214
FBpp0075510		ENSG00000111639|ENST00000229238
FBpp0075511		ENSG00000111641|ENST00000322166
FBpp0075516		ENSG00000111642|ENST00000357008
FBpp0075522		ENSG00000111647|ENST00000279907
FBpp0075533		ENSG00000111652|ENST00000229251
FBpp0075555		ENSG00000111666|ENST00000229266
FBpp0075556		ENSG00000111667|ENST00000389231
FBpp0075560		ENSG00000111678|ENST00000229281
FBpp0075561		ENSG00000111684|ENST00000261407
FBpp0075567		ENSG00000111711|ENST00000229314
FBpp0075586		ENSG00000111725|ENST00000229328
FBpp0075587		ENSG00000111726|ENST00000229329
FBpp0075598		ENSG00000111790|ENST00000229395
FBpp0075599		ENSG00000111802|ENST00000545995
FBpp0075612		ENSG00000111832|ENST00000466444
FBpp0075620		ENSG00000111843|ENST00000229563
FBpp0075621		ENSG00000111845|ENST00000379568
FBpp0075629		ENSG00000111850|ENST00000229570
FBpp0075630		ENSG00000111875|ENST00000229595
FBpp0075645		ENSG00000112033|ENST00000360694
FBpp0075646		ENSG00000112078|ENST00000373731
FBpp0075647		ENSG00000112081|ENST00000373715
FBpp0075649		ENSG00000112110|ENST00000367034
FBpp0075651		ENSG00000112144|ENST00000350082
FBpp0075652		ENSG00000112234|ENST00000229971
FBpp0075653		ENSG00000112249|ENST00000369162
FBpp0075676		ENSG00000112304|ENST00000230048
FBpp0075683		ENSG00000112305|ENST00000316999
FBpp0075686		ENSG00000112335|ENST00000230085
FBpp0075691		ENSG00000112339|ENST00000367837
FBpp0075699		ENSG00000112473|ENST00000374677
FBpp0075714		ENSG00000112514|ENST00000488034
FBpp0075715		ENSG00000112584|ENST00000476287
FBpp0075723		ENSG00000112640|ENST00000485511
FBpp0075727		ENSG00000112651|ENST00000388752
FBpp0075730		ENSG00000112679|ENST00000344450
FBpp0075731		ENSG00000112685|ENST00000230449
FBpp0075738		ENSG00000112695|ENST00000230459
FBpp0075739		ENSG00000112701|ENST00000447266
FBpp0075741		ENSG00000112739|ENST00000337659
FBpp0075742		ENSG00000112855|ENST00000230771
FBpp0075748		ENSG00000112941|ENST00000230859
FBpp0075755		ENSG00000112996|ENST00000507110
FBpp0075759		ENSG00000113013|ENST00000297185
FBpp0075762		ENSG00000113048|ENST00000261413
FBpp0075790		ENSG00000113194|ENST00000261942
FBpp0075791		ENSG00000113282|ENST00000411809
FBpp0075792		ENSG00000113312|ENST00000231238
FBpp0075793		ENSG00000113318|ENST00000265081
FBpp0075807		ENSG00000113328|ENST00000340828
FBpp0075817		ENSG00000113360|ENST00000511367
FBpp0075818		ENSG00000113384|ENST00000265070
FBpp0075819		ENSG00000113387|ENST00000265073
FBpp0075834		ENSG00000113407|ENST00000265112
FBpp0075835		ENSG00000113456|ENST00000382038
FBpp0075836		ENSG00000113460|ENST00000336767
FBpp0075838		ENSG00000113522|ENST00000378823
FBpp0075839		ENSG00000113552|ENST00000311337
FBpp0075845		ENSG00000113558|ENST00000522552
FBpp0075846		ENSG00000113575|ENST00000481195
FBpp0075855		ENSG00000113593|ENST00000261308
FBpp0075856		ENSG00000113615|ENST00000398844
FBpp0075857		ENSG00000113638|ENST00000337702
FBpp0075858		ENSG00000113643|ENST00000231572
FBpp0075859		ENSG00000113648|ENST00000304332
FBpp0075861		ENSG00000113649|ENST00000296702
FBpp0075862		ENSG00000113658|ENST00000545279
FBpp0075865		ENSG00000113712|ENST00000377843
FBpp0075866		ENSG00000113716|ENST00000502717
FBpp0075917		ENSG00000113732|ENST00000519374
FBpp0075918		ENSG00000113811|ENST00000541726
FBpp0075933		ENSG00000113812|ENST00000335754
FBpp0075941		ENSG00000113845|ENST00000494664
FBpp0075952		ENSG00000113851|ENST00000231948
FBpp0075963		ENSG00000114021|ENST00000394140
FBpp0075965		ENSG00000114023|ENST00000477892
FBpp0075966		ENSG00000114026|ENST00000383826
FBpp0075967		ENSG00000114030|ENST00000344337
FBpp0075969		ENSG00000114062|ENST00000232165
FBpp0075970		ENSG00000114125|ENST00000273480
FBpp0075979		ENSG00000114166|ENST00000263754
FBpp0075980		ENSG00000114316|ENST00000265560
FBpp0075981		ENSG00000114354|ENST00000240851
FBpp0075994		ENSG00000114503|ENST00000321256
FBpp0076003		ENSG00000114520|ENST00000251775
FBpp0076005		ENSG00000114650|ENST00000265565
FBpp0076030		ENSG00000114686|ENST00000264995
FBpp0076031		ENSG00000114735|ENST00000232854
FBpp0076068		ENSG00000114784|ENST00000232905
FBpp0076069		ENSG00000114850|ENST00000265044
FBpp0076072		ENSG00000114867|ENST00000434061
FBpp0076073		ENSG00000114902|ENST00000233025
FBpp0076076		ENSG00000114904|ENST00000233027
FBpp0076083		ENSG00000114942|ENST00000392222
FBpp0076084		ENSG00000114982|ENST00000599854
FBpp0076085		ENSG00000115053|ENST00000322723
FBpp0076086		ENSG00000115073|ENST00000289228
FBpp0076087		ENSG00000115084|ENST00000245680
FBpp0076090		ENSG00000115128|ENST00000233468
FBpp0076095		ENSG00000115145|ENST00000263904
FBpp0076096		ENSG00000115170|ENST00000263640
FBpp0076097		ENSG00000115211|ENST00000347454
FBpp0076098		ENSG00000115216|ENST00000379852
FBpp0076121		ENSG00000115233|ENST00000409682
FBpp0076124		ENSG00000115234|ENST00000233575
FBpp0076127		ENSG00000115275|ENST00000233616
FBpp0076128		ENSG00000115289|ENST00000233630
FBpp0076129		ENSG00000115307|ENST00000377526
FBpp0076130		ENSG00000115310|ENST00000394609
FBpp0076132		ENSG00000115317|ENST00000258080
FBpp0076134		ENSG00000115350|ENST00000483063
FBpp0076146		ENSG00000115364|ENST00000393909
FBpp0076155		ENSG00000115368|ENST00000314761
FBpp0076169		ENSG00000115446|ENST00000357765
FBpp0076187		ENSG00000115459|ENST00000315658
FBpp0076188		ENSG00000115484|ENST00000394440
FBpp0076189		ENSG00000115520|ENST00000263960
FBpp0076191		ENSG00000115524|ENST00000335508
FBpp0076200		ENSG00000115540|ENST00000323303
FBpp0076203		ENSG00000115568|ENST00000449707
FBpp0076215		ENSG00000115652|ENST00000283148
FBpp0076216		ENSG00000115661|ENST00000409638
FBpp0076217		ENSG00000115677|ENST00000310931
FBpp0076218		ENSG00000115685|ENST00000234038
FBpp0076219		ENSG00000115816|ENST00000234170
FBpp0076220		ENSG00000115839|ENST00000264158
FBpp0076221		ENSG00000115866|ENST00000264161
FBpp0076238		ENSG00000115875|ENST00000313117
FBpp0076240		ENSG00000115944|ENST00000234301
FBpp0076241		ENSG00000115946|ENST00000263657
FBpp0076242		ENSG00000115947|ENST00000392857
FBpp0076243		ENSG00000115966|ENST00000264110
FBpp0076246		ENSG00000116001|ENST00000415783
FBpp0076251		ENSG00000116030|ENST00000392246
FBpp0076264		ENSG00000116062|ENST00000234420
FBpp0076269		ENSG00000116120|ENST00000281828
FBpp0076280		ENSG00000116171|ENST00000408941
FBpp0076281		ENSG00000116198|ENST00000378230
FBpp0076282		ENSG00000116199|ENST00000263733
FBpp0076297		ENSG00000116205|ENST00000234827
FBpp0076325		ENSG00000116209|ENST00000234831
FBpp0076331		ENSG00000116212|ENST00000319223
FBpp0076337		ENSG00000116221|ENST00000360840
FBpp0076338		ENSG00000116237|ENST00000343813
FBpp0076341		ENSG00000116260|ENST00000367600
FBpp0076342		ENSG00000116266|ENST00000370008
FBpp0076343		ENSG00000116288|ENST00000338639
FBpp0076345		ENSG00000116350|ENST00000373795
FBpp0076350		ENSG00000116406|ENST00000318130
FBpp0076359		ENSG00000116459|ENST00000369722
FBpp0076372		ENSG00000116473|ENST00000369709
FBpp0076373		ENSG00000116586|ENST00000368305
FBpp0076374		ENSG00000116649|ENST00000376957
FBpp0076379		ENSG00000116663|ENST00000376753
FBpp0076387		ENSG00000116670|ENST00000376692
FBpp0076388		ENSG00000116679|ENST00000367498
FBpp0076401		ENSG00000116685|ENST00000376572
FBpp0076407		ENSG00000116750|ENST00000367455
FBpp0076408		ENSG00000116752|ENST00000369541
FBpp0076411		ENSG00000116809|ENST00000375743
FBpp0076414		ENSG00000116857|ENST00000367332
FBpp0076415		ENSG00000116874|ENST00000235521
FBpp0076416		ENSG00000116898|ENST00000373116
FBpp0076418		ENSG00000116903|ENST00000360394
FBpp0076433		ENSG00000116918|ENST00000366639
FBpp0076438		ENSG00000116922|ENST00000358011
FBpp0076445		ENSG00000116957|ENST00000406207
FBpp0076451		ENSG00000117118|ENST00000375499
FBpp0076460		ENSG00000117133|ENST00000370654
FBpp0076465		ENSG00000117143|ENST00000367926
FBpp0076470		ENSG00000117335|ENST00000322918
FBpp0076478		ENSG00000117360|ENST00000324862
FBpp0076485		ENSG00000117362|ENST00000360244
FBpp0076526		ENSG00000117395|ENST00000236051
FBpp0076533		ENSG00000117410|ENST00000472174
FBpp0076549		ENSG00000117419|ENST00000372257
FBpp0076558		ENSG00000117448|ENST00000372070
FBpp0076559		ENSG00000117450|ENST00000262746
FBpp0076560		ENSG00000117475|ENST00000329281
FBpp0076594		ENSG00000117500|ENST00000370282
FBpp0076599		ENSG00000117505|ENST00000370272
FBpp0076600		ENSG00000117528|ENST00000370214
FBpp0076601		ENSG00000117543|ENST00000370109
FBpp0076635		ENSG00000117592|ENST00000340385
FBpp0076659		ENSG00000117593|ENST00000361951
FBpp0076660		ENSG00000117597|ENST00000491415
FBpp0076661		ENSG00000117614|ENST00000236273
FBpp0076677		ENSG00000117691|ENST00000366988
FBpp0076695		ENSG00000117748|ENST00000373912
FBpp0076696		ENSG00000117751|ENST00000236412
FBpp0076706		ENSG00000117859|ENST00000371710
FBpp0076723		ENSG00000117906|ENST00000394885
FBpp0076724		ENSG00000118046|ENST00000326873
FBpp0076725		ENSG00000118197|ENST00000331314
FBpp0076738		ENSG00000118217|ENST00000367942
FBpp0076751		ENSG00000118246|ENST00000236980
FBpp0076756		ENSG00000118518|ENST00000309649
FBpp0076791		ENSG00000118564|ENST00000341285
FBpp0076792		ENSG00000118680|ENST00000237500
FBpp0076802		ENSG00000118705|ENST00000237530
FBpp0076803		ENSG00000118873|ENST00000358951
FBpp0076819		ENSG00000118939|ENST00000377595
FBpp0076822		ENSG00000118960|ENST00000304031
FBpp0076832		ENSG00000118985|ENST00000237853
FBpp0076840		ENSG00000119013|ENST00000237889
FBpp0076848		ENSG00000119041|ENST00000263956
FBpp0076858		ENSG00000119048|ENST00000265339
FBpp0076859		ENSG00000119138|ENST00000377126
FBpp0076860		ENSG00000119231|ENST00000323460
FBpp0076868		ENSG00000119242|ENST00000238156
FBpp0076871		ENSG00000119318|ENST00000358015
FBpp0076880		ENSG00000119335|ENST00000322030
FBpp0076881		ENSG00000119383|ENST00000358994
FBpp0076884		ENSG00000119392|ENST00000372770
FBpp0076890		ENSG00000119396|ENST00000373840
FBpp0076891		ENSG00000119402|ENST00000608872
FBpp0076892		ENSG00000119414|ENST00000373547
FBpp0076893		ENSG00000119421|ENST00000373768
FBpp0076894		ENSG00000119446|ENST00000417201
FBpp0076907		ENSG00000119487|ENST00000350766
FBpp0076918		ENSG00000119509|ENST00000262457
FBpp0076921		ENSG00000119537|ENST00000406396
FBpp0076934		ENSG00000119616|ENST00000341162
FBpp0076939		ENSG00000119638|ENST00000238616
FBpp0076942		ENSG00000119669|ENST00000238647
FBpp0076956		ENSG00000119689|ENST00000334220
FBpp0076990		ENSG00000119705|ENST00000557342
FBpp0077011		ENSG00000119718|ENST00000266126
FBpp0077016		ENSG00000119720|ENST00000354366
FBpp0077017		ENSG00000119723|ENST00000334571
FBpp0077029		ENSG00000119725|ENST00000555044
FBpp0077038		ENSG00000119760|ENST00000337768
FBpp0077039		ENSG00000119777|ENST00000238788
FBpp0077040		ENSG00000119787|ENST00000378954
FBpp0077041		ENSG00000119812|ENST00000403368
FBpp0077042		ENSG00000119878|ENST00000238892
FBpp0077043		ENSG00000119912|ENST00000371581
FBpp0077073		ENSG00000119950|ENST00000239007
FBpp0077074		ENSG00000119953|ENST00000369603
FBpp0077078		ENSG00000119977|ENST00000265993
FBpp0077100		ENSG00000120029|ENST00000370033
FBpp0077101		ENSG00000120137|ENST00000239231
FBpp0077102		ENSG00000120265|ENST00000367380
FBpp0077103		ENSG00000120314|ENST00000358337
FBpp0077104		ENSG00000120438|ENST00000321394
FBpp0077122		ENSG00000120451|ENST00000265909
FBpp0077125		ENSG00000120509|ENST00000239666
FBpp0077151		ENSG00000120526|ENST00000239690
FBpp0077152		ENSG00000120656|ENST00000373824
FBpp0077153		ENSG00000120688|ENST00000379487
FBpp0077166		ENSG00000120697|ENST00000239891
FBpp0077168		ENSG00000120699|ENST00000389704
FBpp0077169		ENSG00000120705|ENST00000360541
FBpp0077171		ENSG00000120725|ENST00000394817
FBpp0077172		ENSG00000120798|ENST00000333003
FBpp0077173		ENSG00000120802|ENST00000393053
FBpp0077174		ENSG00000120805|ENST00000261636
FBpp0077203		ENSG00000120837|ENST00000240055
FBpp0077204		ENSG00000120942|ENST00000376810
FBpp0077206		ENSG00000120948|ENST00000240185
FBpp0077209		ENSG00000120963|ENST00000311212
FBpp0077210		ENSG00000121022|ENST00000357849
FBpp0077259		ENSG00000121067|ENST00000393328
FBpp0077260		ENSG00000121073|ENST00000240333
FBpp0077277		ENSG00000121390|ENST00000338910
FBpp0077303		ENSG00000121579|ENST00000240922
FBpp0077326		ENSG00000121741|ENST00000382869
FBpp0077327		ENSG00000121749|ENST00000550746
FBpp0077328		ENSG00000121774|ENST00000327300
FBpp0077333		ENSG00000121848|ENST00000369291
FBpp0077353		ENSG00000121851|ENST00000369314
FBpp0077358		ENSG00000121864|ENST00000326361
FBpp0077359		ENSG00000121892|ENST00000303538
FBpp0077401		ENSG00000122008|ENST00000241436
FBpp0077402		ENSG00000122033|ENST00000381120
FBpp0077403		ENSG00000122034|ENST00000381140
FBpp0077414		ENSG00000122085|ENST00000391980
FBpp0077419		ENSG00000122140|ENST00000241600
FBpp0077424		ENSG00000122203|ENST00000298569
FBpp0077461		ENSG00000122218|ENST00000241704
FBpp0077491		ENSG00000122299|ENST00000355758
FBpp0077495		ENSG00000122376|ENST00000298784
FBpp0077496		ENSG00000122481|ENST00000370202
FBpp0077497		ENSG00000122482|ENST00000347275
FBpp0077502		ENSG00000122490|ENST00000397778
FBpp0077507		ENSG00000122557|ENST00000396081
FBpp0077514		ENSG00000122565|ENST00000337620
FBpp0077516		ENSG00000122566|ENST00000356674
FBpp0077520		ENSG00000122643|ENST00000396152
FBpp0077521		ENSG00000122678|ENST00000242248
FBpp0077524		ENSG00000122687|ENST00000242257
FBpp0077525		ENSG00000122692|ENST00000397149
FBpp0077538		ENSG00000122705|ENST00000345519
FBpp0077550		ENSG00000122741|ENST00000377724
FBpp0077553		ENSG00000122783|ENST00000430372
FBpp0077554		ENSG00000122873|ENST00000333926
FBpp0077569		ENSG00000122882|ENST00000372979
FBpp0077570		ENSG00000122958|ENST00000263559
FBpp0077576		ENSG00000122965|ENST00000261741
FBpp0077577		ENSG00000123064|ENST00000306014
FBpp0077578		ENSG00000123091|ENST00000242719
FBpp0077581		ENSG00000123124|ENST00000517970
FBpp0077582		ENSG00000123130|ENST00000336430
FBpp0077598		ENSG00000123159|ENST00000393033
FBpp0077617		ENSG00000123178|ENST00000361840
FBpp0077624		ENSG00000123200|ENST00000282007
FBpp0077625		ENSG00000123268|ENST00000262053
FBpp0077658		ENSG00000123349|ENST00000551018
FBpp0077659		ENSG00000123353|ENST00000243045
FBpp0077694		ENSG00000123395|ENST00000336854
FBpp0077701		ENSG00000123416|ENST00000336023
FBpp0077710		ENSG00000123444|ENST00000395288
FBpp0077711		ENSG00000123505|ENST00000368885
FBpp0077715		ENSG00000123545|ENST00000316149
FBpp0077720		ENSG00000123562|ENST00000441076
FBpp0077726		ENSG00000123575|ENST00000493442
FBpp0077727		ENSG00000123595|ENST00000464506
FBpp0077728		ENSG00000123815|ENST00000324464
FBpp0077729		ENSG00000123933|ENST00000337190
FBpp0077731		ENSG00000123983|ENST00000357430
FBpp0077734		ENSG00000124155|ENST00000279036
FBpp0077735		ENSG00000124198|ENST00000371917
FBpp0077740		ENSG00000124209|ENST00000244040
FBpp0077747		ENSG00000124214|ENST00000371828
FBpp0077748		ENSG00000124228|ENST00000371764
FBpp0077749		ENSG00000124275|ENST00000264668
FBpp0077753		ENSG00000124299|ENST00000244137
FBpp0077754		ENSG00000124356|ENST00000394073
FBpp0077763		ENSG00000124383|ENST00000244230
FBpp0077775		ENSG00000124422|ENST00000261497
FBpp0077776		ENSG00000124444|ENST00000391965
FBpp0077777		ENSG00000124486|ENST00000324545
FBpp0077778		ENSG00000124523|ENST00000606117
FBpp0077783		ENSG00000124535|ENST00000380773
FBpp0077784		ENSG00000124541|ENST00000244496
FBpp0077790		ENSG00000124570|ENST00000335686
FBpp0077796		ENSG00000124587|ENST00000304611
FBpp0077802		ENSG00000124608|ENST00000244571
FBpp0077806		ENSG00000124641|ENST00000265350
FBpp0077839		ENSG00000124659|ENST00000372876
FBpp0077844		ENSG00000124688|ENST00000372171
FBpp0077845		ENSG00000124702|ENST00000326974
FBpp0077846		ENSG00000124767|ENST00000373365
FBpp0077847		ENSG00000124783|ENST00000244763
FBpp0077848		ENSG00000124784|ENST00000379834
FBpp0077852		ENSG00000124789|ENST00000262077
FBpp0077856		ENSG00000124795|ENST00000397239
FBpp0077861		ENSG00000124802|ENST00000379715
FBpp0077862		ENSG00000125037|ENST00000245046
FBpp0077863		ENSG00000125107|ENST00000317147
FBpp0077868		ENSG00000125304|ENST00000376387
FBpp0077872		ENSG00000125352|ENST00000371442
FBpp0077873		ENSG00000125375|ENST00000426751
FBpp0077875		ENSG00000125445|ENST00000245539
FBpp0077877		ENSG00000125450|ENST00000245544
FBpp0077880		ENSG00000125457|ENST00000579297
FBpp0077882		ENSG00000125458|ENST00000245552
FBpp0077885		ENSG00000125611|ENST00000324913
FBpp0077899		ENSG00000125629|ENST00000245787
FBpp0077905		ENSG00000125651|ENST00000394456
FBpp0077908		ENSG00000125656|ENST00000245816
FBpp0077909		ENSG00000125734|ENST00000264080
FBpp0077910		ENSG00000125779|ENST00000497424
FBpp0077911		ENSG00000125812|ENST00000377051
FBpp0077912		ENSG00000125817|ENST00000379751
FBpp0077914		ENSG00000125818|ENST00000335877
FBpp0077922		ENSG00000125826|ENST00000353660
FBpp0077927		ENSG00000125827|ENST00000246024
FBpp0077929		ENSG00000125835|ENST00000381342
FBpp0077930		ENSG00000125870|ENST00000246071
FBpp0077934		ENSG00000125875|ENST00000354200
FBpp0077937		ENSG00000125901|ENST00000380325
FBpp0077945		ENSG00000125912|ENST00000246117
FBpp0077946		ENSG00000125944|ENST00000374612
FBpp0077947		ENSG00000125952|ENST00000358664
FBpp0077948		ENSG00000125962|ENST00000536530
FBpp0077962		ENSG00000125970|ENST00000375114
FBpp0077965		ENSG00000125977|ENST00000374980
FBpp0077974		ENSG00000125991|ENST00000348547
FBpp0077975		ENSG00000125995|ENST00000374078
FBpp0077979		ENSG00000126012|ENST00000375401
FBpp0077992		ENSG00000126062|ENST00000266025
FBpp0077998		ENSG00000126067|ENST00000373237
FBpp0078007		ENSG00000126088|ENST00000246337
FBpp0078008		ENSG00000126107|ENST00000372172
FBpp0078012		ENSG00000126226|ENST00000375479
FBpp0078013		ENSG00000126243|ENST00000246529
FBpp0078014		ENSG00000126247|ENST00000246533
FBpp0078024		ENSG00000126261|ENST00000246548
FBpp0078025		ENSG00000126432|ENST00000265462
FBpp0078032		ENSG00000126457|ENST00000391851
FBpp0078037		ENSG00000126461|ENST00000360565
FBpp0078038		ENSG00000126581|ENST00000361523
FBpp0078039		ENSG00000126653|ENST00000247026
FBpp0078043		ENSG00000126698|ENST00000263697
FBpp0078044		ENSG00000126746|ENST00000396799
FBpp0078045		ENSG00000126749|ENST00000261406
FBpp0078046		ENSG00000126756|ENST00000333119
FBpp0078053		ENSG00000126767|ENST00000247161
FBpp0078054		ENSG00000126768|ENST00000376582
FBpp0078058		ENSG00000126773|ENST00000317623
FBpp0078059		ENSG00000126777|ENST00000438792
FBpp0078066		ENSG00000126804|ENST00000358738
FBpp0078077		ENSG00000126858|ENST00000333942
FBpp0078086		ENSG00000126934|ENST00000262948
FBpp0078093		ENSG00000126945|ENST00000316594
FBpp0078099		ENSG00000127022|ENST00000247461
FBpp0078100		ENSG00000127054|ENST00000435064
FBpp0078101		ENSG00000127184|ENST00000515763
FBpp0078112		ENSG00000127220|ENST00000247706
FBpp0078113		ENSG00000127445|ENST00000247970
FBpp0078120		ENSG00000127463|ENST00000477853
FBpp0078139		ENSG00000127483|ENST00000312239
FBpp0078144		ENSG00000127540|ENST00000591899
FBpp0078164		ENSG00000127554|ENST00000248114
FBpp0078200		ENSG00000127580|ENST00000293883
FBpp0078227		ENSG00000127616|ENST00000344626
FBpp0078273		ENSG00000127774|ENST00000248378
FBpp0078274		ENSG00000127804|ENST00000263092
FBpp0078298		ENSG00000127837|ENST00000444053
FBpp0078299		ENSG00000127838|ENST00000248451
FBpp0078300		ENSG00000127870|ENST00000381588
FBpp0078301		ENSG00000127884|ENST00000368547
FBpp0078302		ENSG00000127914|ENST00000356239
FBpp0078303		ENSG00000127952|ENST00000248600
FBpp0078310		ENSG00000127980|ENST00000248633
FBpp0078311		ENSG00000128039|ENST00000264228
FBpp0078312		ENSG00000128185|ENST00000248879
FBpp0078313		ENSG00000128272|ENST00000337304
FBpp0078318		ENSG00000128294|ENST00000338754
FBpp0078319		ENSG00000128463|ENST00000267750
FBpp0078326		ENSG00000128524|ENST00000249289
FBpp0078331		ENSG00000128534|ENST00000249299
FBpp0078338		ENSG00000128563|ENST00000397912
FBpp0078341		ENSG00000128585|ENST00000352689
FBpp0078342		ENSG00000128590|ENST00000249356
FBpp0078343		ENSG00000128595|ENST00000249364
FBpp0078357		ENSG00000128609|ENST00000355749
FBpp0078359		ENSG00000128654|ENST00000249442
FBpp0078360		ENSG00000128699|ENST00000392349
FBpp0078361		ENSG00000128708|ENST00000264108
FBpp0078362		ENSG00000128789|ENST00000317615
FBpp0078363		ENSG00000128829|ENST00000263791
FBpp0078371		ENSG00000128891|ENST00000358005
FBpp0078379		ENSG00000129055|ENST00000354910
FBpp0078382		ENSG00000129083|ENST00000249923
FBpp0078383		ENSG00000129084|ENST00000396394
FBpp0078388		ENSG00000129158|ENST00000265965
FBpp0078389		ENSG00000129197|ENST00000381209
FBpp0078392		ENSG00000129255|ENST00000250124
FBpp0078393		ENSG00000129292|ENST00000395386
FBpp0078394		ENSG00000129460|ENST00000408901
FBpp0078395		ENSG00000129472|ENST00000397762
FBpp0078396		ENSG00000129493|ENST00000543095
FBpp0078397		ENSG00000129515|ENST00000396534
FBpp0078398		ENSG00000129559|ENST00000250495
FBpp0078399		ENSG00000129625|ENST00000379638
FBpp0078400		ENSG00000129636|ENST00000320640
FBpp0078401		ENSG00000129691|ENST00000343823
FBpp0078403		ENSG00000129696|ENST00000360742
FBpp0078404		ENSG00000129968|ENST00000250974
FBpp0078408		ENSG00000130024|ENST00000339209
FBpp0078409		ENSG00000130159|ENST00000270517
FBpp0078414		ENSG00000130177|ENST00000360383
FBpp0078417		ENSG00000130204|ENST00000252487
FBpp0078421		ENSG00000130227|ENST00000252512
FBpp0078422		ENSG00000130305|ENST00000438747
FBpp0078433		ENSG00000130332|ENST00000252622
FBpp0078436		ENSG00000130340|ENST00000392185
FBpp0078463		ENSG00000130348|ENST00000369046
FBpp0078464		ENSG00000130382|ENST00000252674
FBpp0078469		ENSG00000130520|ENST00000593829
FBpp0078478		ENSG00000130638|ENST00000252934
FBpp0078483		ENSG00000130640|ENST00000368563
FBpp0078490		ENSG00000130699|ENST00000252996
FBpp0078496		ENSG00000130703|ENST00000358053
FBpp0078497		ENSG00000130713|ENST00000372352
FBpp0078508		ENSG00000130714|ENST00000372228
FBpp0078516		ENSG00000130717|ENST00000372215
FBpp0078532		ENSG00000130723|ENST00000357304
FBpp0078533		ENSG00000130724|ENST00000312547
FBpp0078534		ENSG00000130725|ENST00000253023
FBpp0078535		ENSG00000130726|ENST00000253024
FBpp0078547		ENSG00000130731|ENST00000301686
FBpp0078565		ENSG00000130764|ENST00000378251
FBpp0078566		ENSG00000130770|ENST00000335514
FBpp0078583		ENSG00000130810|ENST00000253107
FBpp0078584		ENSG00000130811|ENST00000253108
FBpp0078590		ENSG00000130826|ENST00000369550
FBpp0078595		ENSG00000130921|ENST00000253233
FBpp0078639		ENSG00000130935|ENST00000253247
FBpp0078648		ENSG00000130939|ENST00000377157
FBpp0078655		ENSG00000130985|ENST00000335972
FBpp0078656		ENSG00000131013|ENST00000253329
FBpp0078657		ENSG00000131043|ENST00000373932
FBpp0078658		ENSG00000131051|ENST00000361162
FBpp0078662		ENSG00000131069|ENST00000336325
FBpp0078664		ENSG00000131100|ENST00000253413
FBpp0078674		ENSG00000131148|ENST00000253457
FBpp0078675		ENSG00000131269|ENST00000253577
FBpp0078676		ENSG00000131368|ENST00000253686
FBpp0078677		ENSG00000131375|ENST00000253693
FBpp0078678		ENSG00000131408|ENST00000253727
FBpp0078679		ENSG00000131469|ENST00000253788
FBpp0078680		ENSG00000131473|ENST00000352035
FBpp0078704		ENSG00000131495|ENST00000252102
FBpp0078707		ENSG00000131503|ENST00000297183
FBpp0078718		ENSG00000131503|ENST00000360839
FBpp0078719		ENSG00000131507|ENST00000253814
FBpp0078720		ENSG00000131508|ENST00000398733
FBpp0078721		ENSG00000131558|ENST00000253861
FBpp0078722		ENSG00000131584|ENST00000354700
FBpp0078723		ENSG00000131626|ENST00000253925
FBpp0078730		ENSG00000131653|ENST00000326181
FBpp0078731		ENSG00000131669|ENST00000375446
FBpp0078732		ENSG00000131725|ENST00000254029
FBpp0078733		ENSG00000131732|ENST00000380199
FBpp0078754		ENSG00000131748|ENST00000336308
FBpp0078755		ENSG00000131778|ENST00000369258
FBpp0078756		ENSG00000131779|ENST00000369306
FBpp0078759		ENSG00000131795|ENST00000330165
FBpp0078760		ENSG00000131966|ENST00000254286
FBpp0078761		ENSG00000132128|ENST00000343304
FBpp0078766		ENSG00000132153|ENST00000446256
FBpp0078775		ENSG00000132155|ENST00000251849
FBpp0078810		ENSG00000132254|ENST00000254584
FBpp0078814		ENSG00000132275|ENST00000254605
FBpp0078815		ENSG00000132286|ENST00000254616
FBpp0078816		ENSG00000132294|ENST00000254624
FBpp0078817		ENSG00000132300|ENST00000254630
FBpp0078822		ENSG00000132305|ENST00000410111
FBpp0078823		ENSG00000132313|ENST00000337109
FBpp0078842		ENSG00000132323|ENST00000254654
FBpp0078843		ENSG00000132341|ENST00000392369
FBpp0078848		ENSG00000132356|ENST00000397128
FBpp0078849		ENSG00000132376|ENST00000421807
FBpp0078856		ENSG00000132382|ENST00000381556
FBpp0078857		ENSG00000132394|ENST00000254730
FBpp0078862		ENSG00000132405|ENST00000451522
FBpp0078863		ENSG00000132406|ENST00000254742
FBpp0078879		ENSG00000132424|ENST00000438806
FBpp0078880		ENSG00000132432|ENST00000352861
FBpp0078881		ENSG00000132466|ENST00000358602
FBpp0078887		ENSG00000132467|ENST00000254803
FBpp0078890		ENSG00000132471|ENST00000254806
FBpp0078892		ENSG00000132507|ENST00000336458
FBpp0078897		ENSG00000132522|ENST00000389167
FBpp0078898		ENSG00000132591|ENST00000254928
FBpp0078899		ENSG00000132600|ENST00000449359
FBpp0078900		ENSG00000132603|ENST00000254940
FBpp0078914		ENSG00000132604|ENST00000254942
FBpp0078917		ENSG00000132612|ENST00000254950
FBpp0078920		ENSG00000132646|ENST00000379160
FBpp0078921		ENSG00000132669|ENST00000255006
FBpp0078922		ENSG00000132676|ENST00000368336
FBpp0078923		ENSG00000132694|ENST00000361409
FBpp0078925		ENSG00000132768|ENST00000255108
FBpp0078929		ENSG00000132792|ENST00000361383
FBpp0078930		ENSG00000132823|ENST00000255174
FBpp0078931		ENSG00000132842|ENST00000519295
FBpp0078936		ENSG00000132906|ENST00000546424
FBpp0078937		ENSG00000132912|ENST00000447998
FBpp0078955		ENSG00000132963|ENST00000380842
FBpp0078961		ENSG00000132964|ENST00000381527
FBpp0078970		ENSG00000133028|ENST00000255390
FBpp0078971		ENSG00000133226|ENST00000323848
FBpp0078978		ENSG00000133250|ENST00000255616
FBpp0078984		ENSG00000133316|ENST00000529106
FBpp0078992		ENSG00000133393|ENST00000255759
FBpp0078993		ENSG00000133398|ENST00000255764
FBpp0078996		ENSG00000133422|ENST00000215862
FBpp0079000		ENSG00000133597|ENST00000072869
FBpp0079017		ENSG00000133641|ENST00000356891
FBpp0079029		ENSG00000133704|ENST00000256079
FBpp0079030		ENSG00000133773|ENST00000256151
FBpp0079033		ENSG00000133835|ENST00000256216
FBpp0079041		ENSG00000133872|ENST00000256255
FBpp0079042		ENSG00000133895|ENST00000443283
FBpp0079044		ENSG00000133935|ENST00000256319
FBpp0079045		ENSG00000133983|ENST00000389912
FBpp0079046		ENSG00000133997|ENST00000256379
FBpp0079057		ENSG00000134001|ENST00000256383
FBpp0079058		ENSG00000134049|ENST00000256433
FBpp0079071		ENSG00000134077|ENST00000345094
FBpp0079091		ENSG00000134108|ENST00000256496
FBpp0079093		ENSG00000134153|ENST00000256545
FBpp0079111		ENSG00000134262|ENST00000256658
FBpp0079112		ENSG00000134294|ENST00000256689
FBpp0079146		ENSG00000134324|ENST00000256720
FBpp0079147		ENSG00000134330|ENST00000497473
FBpp0079148		ENSG00000134333|ENST00000422447
FBpp0079154		ENSG00000134352|ENST00000381298
FBpp0079162		ENSG00000134375|ENST00000367287
FBpp0079165		ENSG00000134440|ENST00000256854
FBpp0079166		ENSG00000134452|ENST00000379999
FBpp0079167		ENSG00000134480|ENST00000256897
FBpp0079168		ENSG00000134644|ENST00000257075
FBpp0079172		ENSG00000134684|ENST00000373477
FBpp0079187		ENSG00000134686|ENST00000373418
FBpp0079211		ENSG00000134697|ENST00000373062
FBpp0079221		ENSG00000134744|ENST00000371544
FBpp0079235		ENSG00000134809|ENST00000257245
FBpp0079236		ENSG00000134852|ENST00000309964
FBpp0079237		ENSG00000134882|ENST00000376440
FBpp0079238		ENSG00000134899|ENST00000355739
FBpp0079251		ENSG00000134900|ENST00000376065
FBpp0079252		ENSG00000134905|ENST00000257347
FBpp0079254		ENSG00000134910|ENST00000392708
FBpp0079255		ENSG00000134970|ENST00000456936
FBpp0079278		ENSG00000134987|ENST00000506538
FBpp0079279		ENSG00000135018|ENST00000376395
FBpp0079289		ENSG00000135211|ENST00000257663
FBpp0079293		ENSG00000135241|ENST00000422087
FBpp0079294		ENSG00000135249|ENST00000257700
FBpp0079295		ENSG00000135297|ENST00000370300
FBpp0079304		ENSG00000135316|ENST00000369622
FBpp0079305		ENSG00000135334|ENST00000257787
FBpp0079312		ENSG00000135341|ENST00000369332
FBpp0079317		ENSG00000135387|ENST00000341394
FBpp0079364		ENSG00000135392|ENST00000317269
FBpp0079409		ENSG00000135404|ENST00000420846
FBpp0079411		ENSG00000135441|ENST00000257899
FBpp0079443		ENSG00000135446|ENST00000257904
FBpp0079444		ENSG00000135452|ENST00000257910
FBpp0079445		ENSG00000135457|ENST00000257915
FBpp0079448		ENSG00000135503|ENST00000257963
FBpp0079453		ENSG00000135506|ENST00000315970
FBpp0079454		ENSG00000135521|ENST00000367576
FBpp0079462		ENSG00000135535|ENST00000310786
FBpp0079468		ENSG00000135617|ENST00000258083
FBpp0079470		ENSG00000135624|ENST00000258091
FBpp0079475		ENSG00000135677|ENST00000258145
FBpp0079488		ENSG00000135686|ENST00000564996
FBpp0079495		ENSG00000135776|ENST00000344517
FBpp0079514		ENSG00000135778|ENST00000366628
FBpp0079520		ENSG00000135801|ENST00000258281
FBpp0079521		ENSG00000135829|ENST00000367549
FBpp0079522		ENSG00000135930|ENST00000258416
FBpp0079536		ENSG00000135940|ENST00000258424
FBpp0079541		ENSG00000135956|ENST00000258439
FBpp0079542		ENSG00000135972|ENST00000258455
FBpp0079552		ENSG00000136003|ENST00000392807
FBpp0079577		ENSG00000136021|ENST00000360820
FBpp0079584		ENSG00000136026|ENST00000378026
FBpp0079590		ENSG00000136045|ENST00000412830
FBpp0079593		ENSG00000136100|ENST00000378060
FBpp0079595		ENSG00000136143|ENST00000378654
FBpp0079598		ENSG00000136146|ENST00000258648
FBpp0079608		ENSG00000136152|ENST00000349995
FBpp0079609		ENSG00000136159|ENST00000258662
FBpp0079615		ENSG00000136243|ENST00000258742
FBpp0079617		ENSG00000136247|ENST00000405731
FBpp0079622		ENSG00000136270|ENST00000258770
FBpp0079623		ENSG00000136271|ENST00000258772
FBpp0079637		ENSG00000136273|ENST00000258774
FBpp0079650		ENSG00000136381|ENST00000258886
FBpp0079651		ENSG00000136436|ENST00000258947
FBpp0079681		ENSG00000136448|ENST00000258960
FBpp0079704		ENSG00000136450|ENST00000258962
FBpp0079705		ENSG00000136463|ENST00000258975
FBpp0079708		ENSG00000136478|ENST00000584379
FBpp0079710		ENSG00000136485|ENST00000310827
FBpp0079711		ENSG00000136521|ENST00000259037
FBpp0079722		ENSG00000136522|ENST00000476781
FBpp0079723		ENSG00000136527|ENST00000453386
FBpp0079735		ENSG00000136536|ENST00000259050
FBpp0079752		ENSG00000136603|ENST00000458537
FBpp0079753		ENSG00000136628|ENST00000366923
FBpp0079758		ENSG00000136699|ENST00000351288
FBpp0079759		ENSG00000136709|ENST00000322313
FBpp0079760		ENSG00000136718|ENST00000259239
FBpp0079761		ENSG00000136720|ENST00000259241
FBpp0079771		ENSG00000136738|ENST00000377524
FBpp0079772		ENSG00000136754|ENST00000376142
FBpp0079780		ENSG00000136802|ENST00000372600
FBpp0079789		ENSG00000136807|ENST00000373264
FBpp0079791		ENSG00000136816|ENST00000259339
FBpp0079801		ENSG00000136819|ENST00000372447
FBpp0079812		ENSG00000136827|ENST00000351698
FBpp0079813		ENSG00000136870|ENST00000259395
FBpp0079815		ENSG00000136874|ENST00000259400
FBpp0079818		ENSG00000136875|ENST00000374198
FBpp0079819		ENSG00000136888|ENST00000374050
FBpp0079831		ENSG00000136897|ENST00000374865
FBpp0079832		ENSG00000136930|ENST00000259457
FBpp0079833		ENSG00000136933|ENST00000373538
FBpp0079869		ENSG00000136935|ENST00000373555
FBpp0079885		ENSG00000136936|ENST00000375128
FBpp0079886		ENSG00000136938|ENST00000339399
FBpp0079892		ENSG00000136942|ENST00000348462
FBpp0079896		ENSG00000137040|ENST00000259569
FBpp0079908		ENSG00000137074|ENST00000309615
FBpp0079912		ENSG00000137100|ENST00000259632
FBpp0079946		ENSG00000137133|ENST00000259667
FBpp0079975		ENSG00000137154|ENST00000380394
FBpp0079988		ENSG00000137166|ENST00000373063
FBpp0079992		ENSG00000137171|ENST00000458460
FBpp0079999		ENSG00000137200|ENST00000373451
FBpp0080000		ENSG00000137210|ENST00000379542
FBpp0080001		ENSG00000137216|ENST00000323267
FBpp0080008		ENSG00000137221|ENST00000259751
FBpp0080010		ENSG00000137275|ENST00000380409
FBpp0080015		ENSG00000137312|ENST00000376389
FBpp0080016		ENSG00000137337|ENST00000376406
FBpp0080017		ENSG00000137411|ENST00000416670
FBpp0080024		ENSG00000137413|ENST00000372977
FBpp0080047		ENSG00000137414|ENST00000259963
FBpp0080050		ENSG00000137504|ENST00000527447
FBpp0080051		ENSG00000137513|ENST00000281038
FBpp0080063		ENSG00000137522|ENST00000361756
FBpp0080069		ENSG00000137547|ENST00000260102
FBpp0080070		ENSG00000137575|ENST00000260130
FBpp0080097		ENSG00000137692|ENST00000260247
FBpp0080111		ENSG00000137710|ENST00000343115
FBpp0080114		ENSG00000137714|ENST00000260270
FBpp0080117		ENSG00000137764|ENST00000395476
FBpp0080118		ENSG00000137776|ENST00000380516
FBpp0080199		ENSG00000137822|ENST00000564079
FBpp0080200		ENSG00000137824|ENST00000338376
FBpp0080213		ENSG00000137842|ENST00000260403
FBpp0080255		ENSG00000137871|ENST00000267807
FBpp0080260		ENSG00000137947|ENST00000370500
FBpp0080261		ENSG00000137992|ENST00000370132
FBpp0080265		ENSG00000137996|ENST00000370128
FBpp0080266		ENSG00000138032|ENST00000282412
FBpp0080281		ENSG00000138035|ENST00000447944
FBpp0080282		ENSG00000138041|ENST00000272313
FBpp0080283		ENSG00000138069|ENST00000409784
FBpp0080320		ENSG00000138073|ENST00000260643
FBpp0080329		ENSG00000138081|ENST00000402508
FBpp0080331		ENSG00000138095|ENST00000260665
FBpp0080332		ENSG00000138107|ENST00000369905
FBpp0080333		ENSG00000138138|ENST00000308448
FBpp0080334		ENSG00000138279|ENST00000372921
FBpp0080335		ENSG00000138286|ENST00000242505
FBpp0080384		ENSG00000138303|ENST00000394919
FBpp0080387		ENSG00000138363|ENST00000236959
FBpp0080394		ENSG00000138375|ENST00000357276
FBpp0080401		ENSG00000138382|ENST00000260953
FBpp0080405		ENSG00000138385|ENST00000260956
FBpp0080406		ENSG00000138398|ENST00000260970
FBpp0080409		ENSG00000138430|ENST00000284719
FBpp0080411		ENSG00000138433|ENST00000342016
FBpp0080440		ENSG00000138442|ENST00000261015
FBpp0080441		ENSG00000138496|ENST00000462315
FBpp0080442		ENSG00000138592|ENST00000396444
FBpp0080443		ENSG00000138604|ENST00000261858
FBpp0080475		ENSG00000138629|ENST00000395081
FBpp0080489		ENSG00000138668|ENST00000353341
FBpp0080528		ENSG00000138674|ENST00000395310
FBpp0080529		ENSG00000138760|ENST00000264896
FBpp0080530		ENSG00000138777|ENST00000354147
FBpp0080532		ENSG00000138785|ENST00000340139
FBpp0080535		ENSG00000138796|ENST00000309522
FBpp0080537		ENSG00000138802|ENST00000265175
FBpp0080551		ENSG00000138942|ENST00000326132
FBpp0080555		ENSG00000139083|ENST00000396373
FBpp0080574		ENSG00000139131|ENST00000324868
FBpp0080593		ENSG00000139160|ENST00000395763
FBpp0080615		ENSG00000139168|ENST00000266529
FBpp0080620		ENSG00000139180|ENST00000266544
FBpp0080622		ENSG00000139197|ENST00000266564
FBpp0080629		ENSG00000139218|ENST00000369367
FBpp0080637		ENSG00000139291|ENST00000266673
FBpp0080638		ENSG00000139433|ENST00000318348
FBpp0080639		ENSG00000139505|ENST00000381801
FBpp0080640		ENSG00000139508|ENST00000266943
FBpp0080641		ENSG00000139517|ENST00000316334
FBpp0080646		ENSG00000139579|ENST00000267023
FBpp0080648		ENSG00000139620|ENST00000420613
FBpp0080665		ENSG00000139637|ENST00000267103
FBpp0080670		ENSG00000139651|ENST00000416904
FBpp0080676		ENSG00000139684|ENST00000378720
FBpp0080677		ENSG00000139719|ENST00000267199
FBpp0080679		ENSG00000139726|ENST00000280557
FBpp0080688		ENSG00000139793|ENST00000345429
FBpp0080689		ENSG00000139826|ENST00000375898
FBpp0080694		ENSG00000139921|ENST00000457354
FBpp0080700		ENSG00000139990|ENST00000341516
FBpp0080704		ENSG00000140006|ENST00000394942
FBpp0080705		ENSG00000140153|ENST00000342702
FBpp0080706		ENSG00000140157|ENST00000337451
FBpp0080720		ENSG00000140262|ENST00000343827
FBpp0080722		ENSG00000140264|ENST00000600633
FBpp0080723		ENSG00000140265|ENST00000396976
FBpp0080728		ENSG00000140299|ENST00000607373
FBpp0080733		ENSG00000140319|ENST00000267884
FBpp0080734		ENSG00000140320|ENST00000416165
FBpp0080735		ENSG00000140350|ENST00000465139
FBpp0080746		ENSG00000140382|ENST00000381714
FBpp0080774		ENSG00000140395|ENST00000558311
FBpp0080785		ENSG00000140463|ENST00000542334
FBpp0080786		ENSG00000140471|ENST00000314742
FBpp0080787		ENSG00000140474|ENST00000440863
FBpp0080790		ENSG00000140521|ENST00000268124
FBpp0080800		ENSG00000140598|ENST00000268206
FBpp0080803		ENSG00000140612|ENST00000268220
FBpp0080804		ENSG00000140632|ENST00000321919
FBpp0080805		ENSG00000140691|ENST00000457010
FBpp0080807		ENSG00000140694|ENST00000437198
FBpp0080808		ENSG00000140740|ENST00000268379
FBpp0080809		ENSG00000140829|ENST00000268482
FBpp0080810		ENSG00000140830|ENST00000268483
FBpp0080811		ENSG00000140943|ENST00000343411
FBpp0080817		ENSG00000140983|ENST00000315082
FBpp0080820		ENSG00000140987|ENST00000304926
FBpp0080821		ENSG00000140990|ENST00000268668
FBpp0080828		ENSG00000140995|ENST00000418391
FBpp0080829		ENSG00000141002|ENST00000263346
FBpp0080849		ENSG00000141027|ENST00000268712
FBpp0080850		ENSG00000141030|ENST00000268717
FBpp0080851		ENSG00000141076|ENST00000562237
FBpp0080855		ENSG00000141098|ENST00000602496
FBpp0080857		ENSG00000141252|ENST00000291074
FBpp0080860		ENSG00000141367|ENST00000269122
FBpp0080861		ENSG00000141378|ENST00000393038
FBpp0080862		ENSG00000141428|ENST00000592875
FBpp0080865		ENSG00000141429|ENST00000269195
FBpp0080872		ENSG00000141452|ENST00000269221
FBpp0080873		ENSG00000141458|ENST00000269228
FBpp0080888		ENSG00000141499|ENST00000396463
FBpp0080889		ENSG00000141504|ENST00000269298
FBpp0080906		ENSG00000141522|ENST00000269321
FBpp0080917		ENSG00000141543|ENST00000269349
FBpp0080918		ENSG00000141551|ENST00000314028
FBpp0080920		ENSG00000141552|ENST00000344877
FBpp0080940		ENSG00000141556|ENST00000355528
FBpp0080941		ENSG00000141569|ENST00000269383
FBpp0080943		ENSG00000141580|ENST00000392325
FBpp0080968		ENSG00000141627|ENST00000269445
FBpp0080988		ENSG00000141644|ENST00000349085
FBpp0080989		ENSG00000141646|ENST00000342988
FBpp0080998		ENSG00000141699|ENST00000309428
FBpp0081001		ENSG00000141741|ENST00000577810
FBpp0081002		ENSG00000141759|ENST00000269601
FBpp0081004		ENSG00000141858|ENST00000533683
FBpp0081007		ENSG00000141867|ENST00000371835
FBpp0081008		ENSG00000141933|ENST00000359315
FBpp0081009		ENSG00000142082|ENST00000382743
FBpp0081010		ENSG00000142168|ENST00000270142
FBpp0081012		ENSG00000142186|ENST00000270176
FBpp0081027		ENSG00000142188|ENST00000542230
FBpp0081028		ENSG00000142208|ENST00000555528
FBpp0081029		ENSG00000142230|ENST00000270225
FBpp0081052		ENSG00000142409|ENST00000270459
FBpp0081053		ENSG00000142507|ENST00000270586
FBpp0081055		ENSG00000142655|ENST00000356607
FBpp0081082		ENSG00000142676|ENST00000374550
FBpp0081084		ENSG00000142687|ENST00000325722
FBpp0081087		ENSG00000142751|ENST00000374135
FBpp0081091		ENSG00000142892|ENST00000370812
FBpp0081095		ENSG00000143013|ENST00000370544
FBpp0081116		ENSG00000143093|ENST00000369796
FBpp0081117		ENSG00000143106|ENST00000271308
FBpp0081124		ENSG00000143149|ENST00000354775
FBpp0081148		ENSG00000143155|ENST00000367833
FBpp0081153		ENSG00000143158|ENST00000367846
FBpp0081157		ENSG00000143179|ENST00000367879
FBpp0081159		ENSG00000143198|ENST00000367889
FBpp0081184		ENSG00000143207|ENST00000367669
FBpp0081185		ENSG00000143222|ENST00000368003
FBpp0081211		ENSG00000143256|ENST00000368010
FBpp0081212		ENSG00000143321|ENST00000357325
FBpp0081213		ENSG00000143368|ENST00000271628
FBpp0081214		ENSG00000143379|ENST00000271640
FBpp0081217		ENSG00000143393|ENST00000368875
FBpp0081218		ENSG00000143398|ENST00000349792
FBpp0081219		ENSG00000143401|ENST00000314136
FBpp0081225		ENSG00000143409|ENST00000361936
FBpp0081244		ENSG00000143418|ENST00000368954
FBpp0081245		ENSG00000143420|ENST00000369009
FBpp0081249		ENSG00000143436|ENST00000368830
FBpp0081255		ENSG00000143437|ENST00000358595
FBpp0081262		ENSG00000143486|ENST00000271764
FBpp0081263		ENSG00000143543|ENST00000271843
FBpp0081280		ENSG00000143553|ENST00000368685
FBpp0081281		ENSG00000143570|ENST00000310483
FBpp0081283		ENSG00000143575|ENST00000328703
FBpp0081293		ENSG00000143614|ENST00000368655
FBpp0081294		ENSG00000143641|ENST00000366672
FBpp0081303		ENSG00000143742|ENST00000304786
FBpp0081305		ENSG00000143751|ENST00000272091
FBpp0081307		ENSG00000143753|ENST00000323699
FBpp0081308		ENSG00000143756|ENST00000366862
FBpp0081310		ENSG00000143761|ENST00000272102
FBpp0081312		ENSG00000143771|ENST00000465271
FBpp0081317		ENSG00000143774|ENST00000312726
FBpp0081322		ENSG00000143799|ENST00000366794
FBpp0081328		ENSG00000143862|ENST00000272217
FBpp0081330		ENSG00000143878|ENST00000272233
FBpp0081331		ENSG00000143977|ENST00000272348
FBpp0081344		ENSG00000144021|ENST00000488633
FBpp0081347		ENSG00000144028|ENST00000323853
FBpp0081350		ENSG00000144034|ENST00000272424
FBpp0081355		ENSG00000144043|ENST00000272438
FBpp0081356		ENSG00000144048|ENST00000272444
FBpp0081358		ENSG00000144120|ENST00000272521
FBpp0081367		ENSG00000144136|ENST00000272542
FBpp0081369		ENSG00000144224|ENST00000272638
FBpp0081384		ENSG00000144231|ENST00000272645
FBpp0081412		ENSG00000144306|ENST00000272732
FBpp0081426		ENSG00000144320|ENST00000272748
FBpp0081427		ENSG00000144401|ENST00000448007
FBpp0081430		ENSG00000144468|ENST00000341329
FBpp0081434		ENSG00000144524|ENST00000350033
FBpp0081440		ENSG00000144535|ENST00000325385
FBpp0081442		ENSG00000144559|ENST00000273037
FBpp0081443		ENSG00000144566|ENST00000273047
FBpp0081444		ENSG00000144567|ENST00000430297
FBpp0081459		ENSG00000144580|ENST00000273064
FBpp0081461		ENSG00000144591|ENST00000313597
FBpp0081464		ENSG00000144647|ENST00000344697
FBpp0081479		ENSG00000144659|ENST00000273158
FBpp0081480		ENSG00000144741|ENST00000354883
FBpp0081481		ENSG00000144744|ENST00000361055
FBpp0081482		ENSG00000144747|ENST00000543976
FBpp0081483		ENSG00000144827|ENST00000273359
FBpp0081488		ENSG00000144843|ENST00000357003
FBpp0081493		ENSG00000144848|ENST00000283290
FBpp0081507		ENSG00000144867|ENST00000466490
FBpp0081508		ENSG00000144895|ENST00000273435
FBpp0081525		ENSG00000145191|ENST00000273783
FBpp0081526		ENSG00000145293|ENST00000273920
FBpp0081527		ENSG00000145332|ENST00000273963
FBpp0081528		ENSG00000145337|ENST00000273968
FBpp0081539		ENSG00000145354|ENST00000273986
FBpp0081541		ENSG00000145391|ENST00000274031
FBpp0081543		ENSG00000145431|ENST00000502773
FBpp0081545		ENSG00000145439|ENST00000306193
FBpp0081552		ENSG00000145494|ENST00000274137
FBpp0081553		ENSG00000145495|ENST00000274140
FBpp0081554		ENSG00000145675|ENST00000336483
FBpp0081560		ENSG00000145740|ENST00000396591
FBpp0081564		ENSG00000145743|ENST00000542267
FBpp0081568		ENSG00000145780|ENST00000274457
FBpp0081580		ENSG00000145781|ENST00000274458
FBpp0081591		ENSG00000145782|ENST00000274459
FBpp0081593		ENSG00000145817|ENST00000274496
FBpp0081599		ENSG00000145833|ENST00000452510
FBpp0081600		ENSG00000145868|ENST00000340253
FBpp0081604		ENSG00000145901|ENST00000389378
FBpp0081612		ENSG00000145907|ENST00000356245
FBpp0081614		ENSG00000145912|ENST00000274606
FBpp0081619		ENSG00000145916|ENST00000313386
FBpp0081636		ENSG00000145979|ENST00000379300
FBpp0081644		ENSG00000146007|ENST00000274712
FBpp0081645		ENSG00000146063|ENST00000315073
FBpp0081651		ENSG00000146066|ENST00000274787
FBpp0081659		ENSG00000146085|ENST00000274813
FBpp0081662		ENSG00000146109|ENST00000274849
FBpp0081674		ENSG00000146223|ENST00000493763
FBpp0081675		ENSG00000146282|ENST00000369536
FBpp0081676		ENSG00000146425|ENST00000367089
FBpp0081677		ENSG00000146457|ENST00000358372
FBpp0081678		ENSG00000146540|ENST00000357429
FBpp0081683		ENSG00000146576|ENST00000344417
FBpp0081684		ENSG00000146587|ENST00000396912
FBpp0081685		ENSG00000146731|ENST00000275603
FBpp0081686		ENSG00000146834|ENST00000310512
FBpp0081687		ENSG00000146909|ENST00000275820
FBpp0081688		ENSG00000146963|ENST00000354926
FBpp0081689		ENSG00000147099|ENST00000373573
FBpp0081690		ENSG00000147119|ENST00000276055
FBpp0081691		ENSG00000147123|ENST00000276062
FBpp0081693		ENSG00000147124|ENST00000397050
FBpp0081708		ENSG00000147140|ENST00000276079
FBpp0081717		ENSG00000147162|ENST00000373719
FBpp0081725		ENSG00000147164|ENST00000374274
FBpp0081735		ENSG00000147274|ENST00000320676
FBpp0081736		ENSG00000147316|ENST00000519480
FBpp0081737		ENSG00000147382|ENST00000406277
FBpp0081750		ENSG00000147383|ENST00000370274
FBpp0081752		ENSG00000147471|ENST00000328195
FBpp0081754		ENSG00000147533|ENST00000405786
FBpp0081765		ENSG00000147586|ENST00000276585
FBpp0081768		ENSG00000147654|ENST00000337573
FBpp0081769		ENSG00000147677|ENST00000521861
FBpp0081771		ENSG00000147679|ENST00000309822
FBpp0081772		ENSG00000147684|ENST00000276689
FBpp0081787		ENSG00000147687|ENST00000519548
FBpp0081795		ENSG00000147789|ENST00000325241
FBpp0081805		ENSG00000147955|ENST00000277010
FBpp0081809		ENSG00000148090|ENST00000375731
FBpp0081810		ENSG00000148110|ENST00000375344
FBpp0081829		ENSG00000148175|ENST00000286713
FBpp0081830		ENSG00000148187|ENST00000344641
FBpp0081831		ENSG00000148229|ENST00000374171
FBpp0081832		ENSG00000148248|ENST00000371989
FBpp0081834		ENSG00000148296|ENST00000372022
FBpp0081840		ENSG00000148308|ENST00000372097
FBpp0081841		ENSG00000148334|ENST00000338961
FBpp0081843		ENSG00000148335|ENST00000372483
FBpp0081844		ENSG00000148343|ENST00000358369
FBpp0081847		ENSG00000148356|ENST00000323301
FBpp0081860		ENSG00000148358|ENST00000347136
FBpp0081862		ENSG00000148396|ENST00000313050
FBpp0081863		ENSG00000148444|ENST00000376836
FBpp0081882		ENSG00000148450|ENST00000376510
FBpp0081886		ENSG00000148634|ENST00000373700
FBpp0081889		ENSG00000148688|ENST00000371703
FBpp0081890		ENSG00000148719|ENST00000394903
FBpp0081907		ENSG00000148834|ENST00000369713
FBpp0081928		ENSG00000148943|ENST00000278193
FBpp0081929		ENSG00000149016|ENST00000308436
FBpp0081930		ENSG00000149084|ENST00000278353
FBpp0081931		ENSG00000149089|ENST00000395787
FBpp0081932		ENSG00000149100|ENST00000531120
FBpp0081933		ENSG00000149136|ENST00000278412
FBpp0081934		ENSG00000149182|ENST00000524782
FBpp0081935		ENSG00000149187|ENST00000310513
FBpp0081982		ENSG00000149262|ENST00000534064
FBpp0081984		ENSG00000149428|ENST00000404233
FBpp0081985		ENSG00000149474|ENST00000435364
FBpp0081990		ENSG00000149480|ENST00000278823
FBpp0081993		ENSG00000149532|ENST00000340437
FBpp0081994		ENSG00000149547|ENST00000278903
FBpp0081995		ENSG00000149657|ENST00000279068
FBpp0081996		ENSG00000149658|ENST00000370339
FBpp0082008		ENSG00000149743|ENST00000394547
FBpp0082009		ENSG00000149792|ENST00000279242
FBpp0082056		ENSG00000149823|ENST00000279281
FBpp0082057		ENSG00000149923|ENST00000279387
FBpp0082058		ENSG00000149930|ENST00000279394
FBpp0082059		ENSG00000150093|ENST00000302278
FBpp0082062		ENSG00000150316|ENST00000279839
FBpp0082065		ENSG00000150459|ENST00000382533
FBpp0082067		ENSG00000150527|ENST00000396158
FBpp0082069		ENSG00000150753|ENST00000280326
FBpp0082084		ENSG00000150756|ENST00000510047
FBpp0082085		ENSG00000150776|ENST00000280352
FBpp0082171		ENSG00000150779|ENST00000504148
FBpp0082189		ENSG00000150991|ENST00000339647
FBpp0082232		ENSG00000151092|ENST00000280700
FBpp0082240		ENSG00000151116|ENST00000396197
FBpp0082246		ENSG00000151148|ENST00000342494
FBpp0082247		ENSG00000151292|ENST00000395411
FBpp0082261		ENSG00000151348|ENST00000533608
FBpp0082269		ENSG00000151353|ENST00000281017
FBpp0082270		ENSG00000151364|ENST00000353172
FBpp0082271		ENSG00000151366|ENST00000281031
FBpp0082272		ENSG00000151461|ENST00000357604
FBpp0082274		ENSG00000151502|ENST00000281187
FBpp0082276		ENSG00000151532|ENST00000393077
FBpp0082277		ENSG00000151553|ENST00000369248
FBpp0082278		ENSG00000151611|ENST00000281317
FBpp0082279		ENSG00000151623|ENST00000358102
FBpp0082280		ENSG00000151665|ENST00000281382
FBpp0082281		ENSG00000151748|ENST00000324679
FBpp0082282		ENSG00000151923|ENST00000436547
FBpp0082283		ENSG00000152102|ENST00000409185
FBpp0082285		ENSG00000152234|ENST00000398752
FBpp0082298		ENSG00000152464|ENST00000378202
FBpp0082314		ENSG00000152492|ENST00000392455
FBpp0082316		ENSG00000152684|ENST00000274311
FBpp0082333		ENSG00000152795|ENST00000295470
FBpp0082346		ENSG00000152942|ENST00000305138
FBpp0082370		ENSG00000153046|ENST00000397588
FBpp0082384		ENSG00000153066|ENST00000283033
FBpp0082388		ENSG00000153130|ENST00000394205
FBpp0082389		ENSG00000153187|ENST00000444376
FBpp0082390		ENSG00000153201|ENST00000283195
FBpp0082391		ENSG00000153485|ENST00000283534
FBpp0082404		ENSG00000153487|ENST00000338450
FBpp0082405		ENSG00000153561|ENST00000283632
FBpp0082421		ENSG00000153827|ENST00000283943
FBpp0082422		ENSG00000153879|ENST00000284000
FBpp0082423		ENSG00000153936|ENST00000370550
FBpp0082436		ENSG00000154001|ENST00000337537
FBpp0082437		ENSG00000154079|ENST00000370474
FBpp0082438		ENSG00000154122|ENST00000284268
FBpp0082445		ENSG00000154144|ENST00000441174
FBpp0082456		ENSG00000154174|ENST00000284320
FBpp0082457		ENSG00000154222|ENST00000371586
FBpp0082459		ENSG00000154305|ENST00000344922
FBpp0082460		ENSG00000154328|ENST00000284503
FBpp0082464		ENSG00000154473|ENST00000368865
FBpp0082469		ENSG00000154518|ENST00000284727
FBpp0082507		ENSG00000154582|ENST00000520242
FBpp0082511		ENSG00000154723|ENST00000400093
FBpp0082521		ENSG00000154767|ENST00000285021
FBpp0082522		ENSG00000154781|ENST00000383794
FBpp0082540		ENSG00000154813|ENST00000488423
FBpp0082546		ENSG00000154814|ENST00000285083
FBpp0082547		ENSG00000154832|ENST00000285106
FBpp0082550		ENSG00000154845|ENST00000400555
FBpp0082555		ENSG00000154889|ENST00000588072
FBpp0082556		ENSG00000155008|ENST00000373173
FBpp0082557		ENSG00000155016|ENST00000332884
FBpp0082575		ENSG00000155097|ENST00000395862
FBpp0082576		ENSG00000155252|ENST00000370631
FBpp0082580		ENSG00000155256|ENST00000393677
FBpp0082581		ENSG00000155287|ENST00000370495
FBpp0082590		ENSG00000155313|ENST00000285679
FBpp0082601		ENSG00000155438|ENST00000285814
FBpp0082628		ENSG00000155463|ENST00000285848
FBpp0082633		ENSG00000155506|ENST00000336314
FBpp0082657		ENSG00000155868|ENST00000286317
FBpp0082658		ENSG00000155906|ENST00000367303
FBpp0082659		ENSG00000155959|ENST00000286428
FBpp0082660		ENSG00000156110|ENST00000372734
FBpp0082661		ENSG00000156171|ENST00000539140
FBpp0082662		ENSG00000156256|ENST00000399976
FBpp0082663		ENSG00000156261|ENST00000286788
FBpp0082664		ENSG00000156304|ENST00000286835
FBpp0082677		ENSG00000156411|ENST00000286953
FBpp0082692		ENSG00000156467|ENST00000287022
FBpp0082693		ENSG00000156469|ENST00000287025
FBpp0082709		ENSG00000156471|ENST00000517309
FBpp0082715		ENSG00000156482|ENST00000287038
FBpp0082716		ENSG00000156502|ENST00000359655
FBpp0082717		ENSG00000156599|ENST00000287169
FBpp0082718		ENSG00000156603|ENST00000337672
FBpp0082719		ENSG00000156639|ENST00000287218
FBpp0082731		ENSG00000156671|ENST00000542569
FBpp0082733		ENSG00000156697|ENST00000394422
FBpp0082742		ENSG00000156831|ENST00000287437
FBpp0082746		ENSG00000156858|ENST00000300835
FBpp0082754		ENSG00000156875|ENST00000370152
FBpp0082759		ENSG00000156928|ENST00000466681
FBpp0082766		ENSG00000156958|ENST00000396509
FBpp0082767		ENSG00000156973|ENST00000287600
FBpp0082773		ENSG00000156983|ENST00000302054
FBpp0082786		ENSG00000156990|ENST00000383820
FBpp0082803		ENSG00000157014|ENST00000287652
FBpp0082813		ENSG00000157020|ENST00000350697
FBpp0082817		ENSG00000157045|ENST00000287706
FBpp0082818		ENSG00000157450|ENST00000348370
FBpp0082819		ENSG00000157483|ENST00000288235
FBpp0082832		ENSG00000157593|ENST00000393812
FBpp0082833		ENSG00000157778|ENST00000288607
FBpp0082851		ENSG00000157823|ENST00000336418
FBpp0082863		ENSG00000157837|ENST00000353487
FBpp0082864		ENSG00000157881|ENST00000378466
FBpp0082865		ENSG00000157954|ENST00000288828
FBpp0082869		ENSG00000158042|ENST00000288937
FBpp0082893		ENSG00000158092|ENST00000288986
FBpp0082897		ENSG00000158411|ENST00000289359
FBpp0082912		ENSG00000158417|ENST00000289371
FBpp0082916		ENSG00000158435|ENST00000289382
FBpp0082923		ENSG00000158470|ENST00000371711
FBpp0082927		ENSG00000158480|ENST00000289431
FBpp0082928		ENSG00000158526|ENST00000375151
FBpp0082929		ENSG00000158552|ENST00000289528
FBpp0082950		ENSG00000158604|ENST00000457408
FBpp0082963		ENSG00000158669|ENST00000396987
FBpp0082974		ENSG00000158711|ENST00000357992
FBpp0082975		ENSG00000158773|ENST00000435396
FBpp0082976		ENSG00000158793|ENST00000368009
FBpp0082977		ENSG00000158828|ENST00000321556
FBpp0082978		ENSG00000158850|ENST00000319769
FBpp0082980		ENSG00000159063|ENST00000299626
FBpp0082984		ENSG00000159079|ENST00000290155
FBpp0082985		ENSG00000159086|ENST00000290178
FBpp0082995		ENSG00000159111|ENST00000351111
FBpp0082996		ENSG00000159131|ENST00000381815
FBpp0082998		ENSG00000159140|ENST00000300278
FBpp0083015		ENSG00000159200|ENST00000313806
FBpp0083022		ENSG00000159202|ENST00000360943
FBpp0083026		ENSG00000159210|ENST00000290330
FBpp0083027		ENSG00000159346|ENST00000340990
[truncated: 3,755 more rows]

## Sheet: Table S1B. Interpro
Table S1B.	List of the Chemosensory Interpro terms
Interpro term	Description			Family Name	Described in
IPR006170	Pheromone/general odorant binding protein			OBP, GOBP, PBP	Insects
IPR013604	7TM chemoreceptor			GR	Insects
IPR009318	Gustatory receptor (Trehalose receptor)			GR	Insects
IPR005055	Insect odorant-binding protein A10/Ejaculatory bulb-specific protein 3			CSP, OS-D	Insects
IPR004117	Olfactory receptor, Drosophila			OR	Insects
IPR001320	Ionotropic glutamate receptor			IR, IGluR	Insects / Mammals
IPR002159	CD36 antigen			CD36, SNMP	Insects / Mammals
IPR003172	MD-2-related lipid-recognition domain			NPC2	Insects / Mammals
IPR002448	Mammalian Odour-binding protein			OBP	Mammals
IPR000725	Mammalian Olfactory receptor			GR	Mammals
IPR007960	Mammalian taste receptor			GR, TAS2R	Mammals
