# Supplementary material for: Comparative analysis of tissue-specific transcriptomes in the funnel-web spider Macrothele calpeiana (Araneae, Hexathelidae)
Source: PeerJ. 2015 Jun 30;3:e1064. doi: 10.7717/peerj.1064 (PMC4493671; doi:10.7717/peerj.1064)
Supplement: Table S3 — Summary of the functional annotation of the M. calpeiana transcripts. [file peerj-03-1064-s003.xlsx]

## Sheet: Sequence Information
Table S3.		Summary of the functional annotation of transcripts
ID	Sequence_ID	Contig_ID	Length	Singleton	Expression Location	GO_annotation	InterPro_Domain	Blast_hit	HK_hit	CEG_hit	KEGG
1	Mcal_1	Contig227.Newo100p95.cap3o60p95	506	No	I	-	IPR027417 (G3DSA:3.40.50.GENE3D); PTHR24031:SF168 (PANTHER); PTHR24031 (PANTHER)	Yes	No	No	-
2	Mcal_2	Contig238.Newo100p95.cap3o60p95	475	No	I	P:GO:0044237; F:GO:0050662; F:GO:0003978; P:GO:0006012	IPR008089 (PRINTS); G3DSA:3.90.25.10 (GENE3D); IPR025308 (PFAM); PTHR10366 (PANTHER); IPR005886 (PTHR10366:PANTHER); SSF51735 (SUPERFAMILY)	Yes	No	No	map00520 map00052
3	Mcal_3	Contig251.Newo100p95.cap3o60p95	445	No	I	-	Coil (COILS); IPR007513 (PFAM); PTHR13596:SF0 (PANTHER); PTHR13596 (PANTHER)	Yes	No	No	-
4	Mcal_4	Contig265.Newo100p95.cap3o60p95	575	No	I	-	-	Yes	No	No	-
5	Mcal_5	Contig282.Newo100p95.cap3o60p95	827	No	I	-	-	Yes	No	No	-
6	Mcal_6	Contig288.Newo100p95.cap3o60p95	641	No	I	-	SIGNAL_PEPTIDE_N_REGION (PHOBIUS); TRANSMEMBRANE (PHOBIUS); SIGNAL_PEPTIDE_C_REGION (PHOBIUS); NON_CYTOPLASMIC_DOMAIN (PHOBIUS); SIGNAL_PEPTIDE (PHOBIUS); SIGNAL_PEPTIDE_H_REGION (PHOBIUS); CYTOPLASMIC_DOMAIN (PHOBIUS); SignalP-TM (SIGNALP_EUK)	Yes	No	No	-
7	Mcal_7	Contig289.Newo100p95.cap3o60p95	364	No	I	-	SIGNAL_PEPTIDE_C_REGION (PHOBIUS); SIGNAL_PEPTIDE (PHOBIUS); SIGNAL_PEPTIDE_N_REGION (PHOBIUS); NON_CYTOPLASMIC_DOMAIN (PHOBIUS); SIGNAL_PEPTIDE_H_REGION (PHOBIUS); SignalP-noTM (SIGNALP_EUK)	No	No	No	-
8	Mcal_8	Contig304.Newo100p95.cap3o60p95	660	No	I	-	-	Yes	No	No	-
9	Mcal_9	Contig313.Newo100p95.cap3o60p95	671	No	I	-	-	Yes	No	No	-
10	Mcal_10	Contig340.Newo100p95.cap3o60p95	424	No	I	-	SIGNAL_PEPTIDE_N_REGION (PHOBIUS); SIGNAL_PEPTIDE (PHOBIUS); SIGNAL_PEPTIDE_C_REGION (PHOBIUS); SIGNAL_PEPTIDE_H_REGION (PHOBIUS); NON_CYTOPLASMIC_DOMAIN (PHOBIUS); SignalP-TM (SIGNALP_GRAM_POSITIVE); SignalP-noTM (SIGNALP_EUK); TMhelix (TMHMM)	No	No	No	-
11	Mcal_11	Contig353.Newo100p95.cap3o60p95	209	No	I	-	-	No	No	No	-
12	Mcal_12	Contig354.Newo100p95.cap3o60p95	464	No	I	-	SIGNAL_PEPTIDE_C_REGION (PHOBIUS); SIGNAL_PEPTIDE_N_REGION (PHOBIUS); TRANSMEMBRANE (PHOBIUS); SIGNAL_PEPTIDE_H_REGION (PHOBIUS); SIGNAL_PEPTIDE (PHOBIUS); CYTOPLASMIC_DOMAIN (PHOBIUS); NON_CYTOPLASMIC_DOMAIN (PHOBIUS)	No	No	No	-
13	Mcal_13	Contig376.Newo100p95.cap3o60p95	215	No	I	-	-	No	No	No	-
14	Mcal_14	Contig380.Newo100p95.cap3o60p95	595	No	I	P:GO:0070534; P:GO:0038123; P:GO:0033182; P:GO:0038095; P:GO:0034142; P:GO:0000724; P:GO:0034134; P:GO:0034162; P:GO:0034166; C:GO:0035370; F:GO:0043130; C:GO:0005829; P:GO:0006511; C:GO:0000151; P:GO:0019221; C:GO:0031372; P:GO:0043123; P:GO:0034146; F:GO:0004842; P:GO:0050852; P:GO:0031058; P:GO:0051443; P:GO:0070423; P:GO:0000729; P:GO:0006301; P:GO:0051092; P:GO:0002755; C:GO:0005634; F:GO:00…	IPR016135 (G3DSA:3.10.110.GENE3D); IPR000608 (PFAM); PTHR24067 (PANTHER); PTHR24067:SF79 (PANTHER); IPR000608 (PROSITE_PROFILES); IPR016135 (SUPERFAMILY)	Yes	Yes	Yes	-
15	Mcal_15	Contig382.Newo100p95.cap3o60p95	606	No	I	F:GO:0004687; P:GO:0006468; F:GO:0005524	IPR002290 (SMART); G3DSA:1.10.510.10 (GENE3D); IPR000719 (PFAM); IPR020675 (PANTHER); IPR000719 (PROSITE_PROFILES); IPR011009 (SUPERFAMILY)	Yes	Yes	Yes	-
16	Mcal_16	Contig389.Newo100p95.cap3o60p95	385	No	I	C:GO:0005856; C:GO:0005737; F:GO:0005524	SIGNAL_PEPTIDE_H_REGION (PHOBIUS); SIGNAL_PEPTIDE_C_REGION (PHOBIUS); SIGNAL_PEPTIDE_N_REGION (PHOBIUS); SIGNAL_PEPTIDE (PHOBIUS); NON_CYTOPLASMIC_DOMAIN (PHOBIUS); SignalP-noTM (SIGNALP_EUK)	Yes	Yes	Yes	-
17	Mcal_17	Contig392.Newo100p95.cap3o60p95	382	No	I	F:GO:0031404; C:GO:0005615; P:GO:0015671; F:GO:0016491; F:GO:0005507; F:GO:0005344; P:GO:0051259; P:GO:0055114	IPR005203 (G3DSA:2.60.40.GENE3D); IPR005203 (PFAM); PTHR11511:SF24 (PANTHER); IPR013788 (PANTHER); IPR014756 (SUPERFAMILY)	Yes	No	No	-
18	Mcal_18	Contig393.Newo100p95.cap3o60p95	352	No	I	F:GO:0005509	IPR011992 (G3DSA:1.10.238.GENE3D); PTHR23048 (PANTHER); SSF47473 (SUPERFAMILY)	Yes	Yes	No	-
19	Mcal_19	Contig396.Newo100p95.cap3o60p95	776	No	I	F:GO:0003674; P:GO:0042832; C:GO:0005576; P:GO:0045087; P:GO:0042742	NON_CYTOPLASMIC_DOMAIN (PHOBIUS); CYTOPLASMIC_DOMAIN (PHOBIUS); TRANSMEMBRANE (PHOBIUS)	Yes	No	No	-
20	Mcal_20	Contig407.Newo100p95.cap3o60p95	327	No	I	-	-	Yes	No	No	-
21	Mcal_21	Contig412.Newo100p95.cap3o60p95	366	No	I	P:GO:0055114; F:GO:0016705; F:GO:0020037; F:GO:0016491; F:GO:0009055; P:GO:0008152; F:GO:0005506	-	Yes	No	No	-
22	Mcal_22	Contig414.Newo100p95.cap3o60p95	382	No	I	-	-	Yes	No	No	-
23	Mcal_23	Contig420.Newo100p95.cap3o60p95	120	No	I	-	-	No	No	No	-
24	Mcal_24	Contig424.Newo100p95.cap3o60p95	454	No	I	-	-	No	No	No	-
25	Mcal_25	Contig427.Newo100p95.cap3o60p95	363	No	I	-	CYTOPLASMIC_DOMAIN (PHOBIUS); SIGNAL_PEPTIDE_N_REGION (PHOBIUS); TRANSMEMBRANE (PHOBIUS); NON_CYTOPLASMIC_DOMAIN (PHOBIUS); SIGNAL_PEPTIDE_C_REGION (PHOBIUS); SIGNAL_PEPTIDE_H_REGION (PHOBIUS); SIGNAL_PEPTIDE (PHOBIUS); SignalP-TM (SIGNALP_EUK); TMhelix (TMHMM); TMhelix (TMHMM)	Yes	No	No	-
26	Mcal_26	Contig429.Newo100p95.cap3o60p95	387	No	I	F:GO:0008270; F:GO:0016740	IPR001781 (SMART); IPR001781 (G3DSA:2.10.110.GENE3D); IPR001781 (PFAM); PTHR24214 (PANTHER); PTHR24214:SF29 (PANTHER); IPR001781 (PROSITE_PATTERNS); IPR001781 (PROSITE_PROFILES); IPR001781 (PROSITE_PROFILES); SSF57716 (SUPERFAMILY); SSF57716 (SUPERFAMILY)	Yes	Yes	No	-
27	Mcal_27	Contig430.Newo100p95.cap3o60p95	460	No	I	F:GO:0003779; P:GO:0030036	IPR005455 (PRINTS); IPR005455 (PRINTS); IPR005455 (SMART); IPR005455 (PFAM); G3DSA:3.30.450.30 (GENE3D); IPR005455 (PANTHER); PTHR11604:SF0 (PANTHER); IPR005455 (SUPERFAMILY)	Yes	No	Yes	-
28	Mcal_28	Contig435.Newo100p95.cap3o60p95	393	No	I	-	-	No	No	No	-
29	Mcal_29	Contig438.Newo100p95.cap3o60p95	230	No	I	-	CYTOPLASMIC_DOMAIN (PHOBIUS); NON_CYTOPLASMIC_DOMAIN (PHOBIUS); TRANSMEMBRANE (PHOBIUS); TMhelix (TMHMM)	Yes	No	Yes	-
30	Mcal_30	Contig440.Newo100p95.cap3o60p95	432	No	I	C:GO:0005856; C:GO:0005737; F:GO:0005524	-	Yes	Yes	Yes	-
31	Mcal_31	Contig455.Newo100p95.cap3o60p95	414	No	I	-	-	Yes	No	No	-
32	Mcal_32	Contig456.Newo100p95.cap3o60p95	771	No	I	P:GO:0035690; F:GO:0004364; C:GO:0043234; P:GO:0006749; C:GO:0005576; F:GO:0005496; F:GO:0046982; F:GO:0042803	IPR004045 (PFAM); IPR012336 (G3DSA:3.40.30.GENE3D); IPR004046 (PFAM); IPR010987 (G3DSA:1.20.1050.GENE3D); PTHR11571:SF108 (PANTHER); PTHR11571 (PANTHER); IPR010987 (PROSITE_PROFILES); IPR004045 (PROSITE_PROFILES); IPR010987 (SUPERFAMILY); IPR012336 (SUPERFAMILY)	Yes	No	No	map00982 map00980 map00480
33	Mcal_33	Contig458.Newo100p95.cap3o60p95	722	No	I	C:GO:0005737; F:GO:0004829; F:GO:0005524; P:GO:0006435	IPR002320 (PRINTS); G3DSA:3.30.930.10 (GENE3D); IPR004154 (G3DSA:3.40.50.GENE3D); IPR004154 (PFAM); PTHR11451 (PANTHER); PTHR11451:SF22 (PANTHER); SSF55681 (SUPERFAMILY); IPR004154 (SUPERFAMILY)	Yes	No	Yes	map00970
34	Mcal_34	Contig461.Newo100p95.cap3o60p95	474	No	I	-	TRANSMEMBRANE (PHOBIUS); CYTOPLASMIC_DOMAIN (PHOBIUS); NON_CYTOPLASMIC_DOMAIN (PHOBIUS); TRANSMEMBRANE (PHOBIUS); NON_CYTOPLASMIC_DOMAIN (PHOBIUS); TMhelix (TMHMM); TMhelix (TMHMM)	Yes	No	No	-
35	Mcal_35	Contig465.Newo100p95.cap3o60p95	413	No	I	-	-	No	No	No	-
36	Mcal_36	Contig471.Newo100p95.cap3o60p95	363	No	I	-	-	Yes	No	No	-
37	Mcal_37	Contig475.Newo100p95.cap3o60p95	878	No	I	F:GO:0005507; C:GO:0005615; F:GO:0031404; F:GO:0005344; F:GO:0016491; P:GO:0015671; P:GO:0055114	IPR005203 (G3DSA:2.60.40.GENE3D); IPR005203 (PFAM); PTHR11511:SF4 (PANTHER); IPR013788 (PANTHER); IPR014756 (SUPERFAMILY)	Yes	No	No	-
38	Mcal_38	Contig481.Newo100p95.cap3o60p95	389	No	I	-	-	No	No	No	-
39	Mcal_39	Contig482.Newo100p95.cap3o60p95	417	No	I	-	TRANSMEMBRANE (PHOBIUS); CYTOPLASMIC_DOMAIN (PHOBIUS); NON_CYTOPLASMIC_DOMAIN (PHOBIUS)	Yes	No	No	-
40	Mcal_40	Contig484.Newo100p95.cap3o60p95	790	No	I	P:GO:0006412; C:GO:0008250; P:GO:0018279; C:GO:0016021; P:GO:0043687; C:GO:0042470; C:GO:0005791; P:GO:0006614; F:GO:0004579	IPR007676 (PFAM); IPR007676 (PANTHER); PTHR21049:SF0 (PANTHER); CYTOPLASMIC_DOMAIN (PHOBIUS); TRANSMEMBRANE (PHOBIUS); NON_CYTOPLASMIC_DOMAIN (PHOBIUS); TMhelix (TMHMM)	Yes	No	No	-
41	Mcal_41	Contig486.Newo100p95.cap3o60p95	241	No	I	-	CYTOPLASMIC_DOMAIN (PHOBIUS); NON_CYTOPLASMIC_DOMAIN (PHOBIUS); TRANSMEMBRANE (PHOBIUS); TMhelix (TMHMM)	Yes	No	No	-
42	Mcal_42	Contig496.Newo100p95.cap3o60p95	726	No	I	P:GO:0006810; C:GO:0005622; F:GO:0005215	SIGNAL_PEPTIDE_N_REGION (PHOBIUS); SIGNAL_PEPTIDE_C_REGION (PHOBIUS); SIGNAL_PEPTIDE (PHOBIUS); SIGNAL_PEPTIDE_H_REGION (PHOBIUS); NON_CYTOPLASMIC_DOMAIN (PHOBIUS)	Yes	No	No	-
43	Mcal_43	Contig499.Newo100p95.cap3o60p95	591	No	I	F:GO:0005507; C:GO:0005615; F:GO:0031404; F:GO:0005344; F:GO:0016491; P:GO:0015671; P:GO:0055114	SIGNAL_PEPTIDE_N_REGION (PHOBIUS); SIGNAL_PEPTIDE (PHOBIUS); SIGNAL_PEPTIDE_C_REGION (PHOBIUS); NON_CYTOPLASMIC_DOMAIN (PHOBIUS); SIGNAL_PEPTIDE_H_REGION (PHOBIUS)	Yes	No	No	-
44	Mcal_44	Contig502.Newo100p95.cap3o60p95	641	No	I	F:GO:0005524; P:GO:0016310; F:GO:0047323	TRANSMEMBRANE (PHOBIUS); CYTOPLASMIC_DOMAIN (PHOBIUS); NON_CYTOPLASMIC_DOMAIN (PHOBIUS)	Yes	No	Yes	-
45	Mcal_45	Contig508.Newo100p95.cap3o60p95	371	No	I	-	NON_CYTOPLASMIC_DOMAIN (PHOBIUS); SIGNAL_PEPTIDE_N_REGION (PHOBIUS); SIGNAL_PEPTIDE (PHOBIUS); SIGNAL_PEPTIDE_C_REGION (PHOBIUS); SIGNAL_PEPTIDE_H_REGION (PHOBIUS); SignalP-noTM (SIGNALP_EUK)	No	No	No	-
46	Mcal_46	Contig509.Newo100p95.cap3o60p95	472	No	I	F:GO:0008289; P:GO:0006810; F:GO:0005215; C:GO:0044424	-	Yes	No	No	-
47	Mcal_47	Contig512.Newo100p95.cap3o60p95	414	No	I	F:GO:0005507; C:GO:0005615; F:GO:0031404; F:GO:0005344; F:GO:0016491; P:GO:0015671; P:GO:0055114	-	Yes	No	No	-
48	Mcal_48	Contig515.Newo100p95.cap3o60p95	478	No	I	F:GO:0030337; F:GO:0003677; P:GO:0006275; C:GO:0043626; C:GO:0005634	IPR000730 (PRINTS); IPR022648 (PFAM); IPR022649 (PFAM); G3DSA:3.70.10.10 (GENE3D); IPR000730 (TIGRFAM); IPR000730 (PANTHER); IPR022659 (PROSITE_PATTERNS); SSF55979 (SUPERFAMILY); SSF55979 (SUPERFAMILY)	Yes	Yes	Yes	-
49	Mcal_49	Contig518.Newo100p95.cap3o60p95	533	No	I	-	-	No	No	No	-
50	Mcal_50	Contig520.Newo100p95.cap3o60p95	433	No	I	-	IPR008978 (G3DSA:2.60.40.GENE3D); IPR007052 (PFAM); PTHR12356 (PANTHER); IPR007052 (PROSITE_PROFILES); IPR008978 (SUPERFAMILY)	Yes	Yes	No	-
51	Mcal_51	Contig529.Newo100p95.cap3o60p95	360	No	I	-	-	No	No	No	-
52	Mcal_52	Contig530.Newo100p95.cap3o60p95	359	No	I	-	-	No	No	No	-
53	Mcal_53	Contig536.Newo100p95.cap3o60p95	644	No	I	C:GO:0016021	IPR018732 (PFAM); PTHR31488:SF1 (PANTHER); PTHR31488 (PANTHER)	Yes	No	No	-
54	Mcal_54	Contig539.Newo100p95.cap3o60p95	528	No	I	-	-	Yes	No	No	-
55	Mcal_55	Contig542.Newo100p95.cap3o60p95	757	No	I	C:GO:0005737; F:GO:0008289; C:GO:0005886; F:GO:0003723	Coil (COILS); IPR004087 (SMART); IPR004088 (PFAM); IPR004088 (G3DSA:3.30.1370.GENE3D); PTHR10627 (PANTHER); PTHR10627:SF34 (PANTHER); IPR004088 (PROSITE_PROFILES); IPR004088 (PROSITE_PROFILES); IPR004088 (PROSITE_PROFILES); IPR004088 (SUPERFAMILY); IPR004088 (SUPERFAMILY); IPR004088 (SUPERFAMILY)	Yes	Yes	No	-
56	Mcal_56	Contig544.Newo100p95.cap3o60p95	549	No	I	-	IPR021859 (PFAM); PTHR16148 (PANTHER); PTHR16148:SF3 (PANTHER)	Yes	No	No	-
57	Mcal_57	Contig555.Newo100p95.cap3o60p95	197	No	I	-	TRANSMEMBRANE (PHOBIUS); CYTOPLASMIC_DOMAIN (PHOBIUS); NON_CYTOPLASMIC_DOMAIN (PHOBIUS); TMhelix (TMHMM)	No	No	No	-
58	Mcal_58	Contig557.Newo100p95.cap3o60p95	532	No	I	-	TRANSMEMBRANE (PHOBIUS); TRANSMEMBRANE (PHOBIUS); NON_CYTOPLASMIC_DOMAIN (PHOBIUS); NON_CYTOPLASMIC_DOMAIN (PHOBIUS); CYTOPLASMIC_DOMAIN (PHOBIUS); CYTOPLASMIC_DOMAIN (PHOBIUS); TRANSMEMBRANE (PHOBIUS); TMhelix (TMHMM); TMhelix (TMHMM); TMhelix (TMHMM)	No	No	No	-
59	Mcal_59	Contig84.Newo100p95.cap3o60p95	1433	No	I	P:GO:0055085; C:GO:0005743; F:GO:0005215	IPR002113 (PRINTS); IPR002067 (PRINTS); IPR023395 (G3DSA:1.50.40.GENE3D); IPR018108 (PFAM); PTHR24089:SF169 (PANTHER); PTHR24089 (PANTHER); IPR018108 (PROSITE_PROFILES); IPR018108 (PROSITE_PROFILES); IPR023395 (SUPERFAMILY); TMhelix (TMHMM)	Yes	Yes	Yes	-
60	Mcal_60	Contig997.Newo100p95.cap3o60p95	466	No	I	-	NON_CYTOPLASMIC_DOMAIN (PHOBIUS); TRANSMEMBRANE (PHOBIUS); TRANSMEMBRANE (PHOBIUS); NON_CYTOPLASMIC_DOMAIN (PHOBIUS); CYTOPLASMIC_DOMAIN (PHOBIUS); TMhelix (TMHMM); TMhelix (TMHMM)	No	No	No	-
61	Mcal_61	G232G8W04H03HN_leg	218	Yes	I	-	-	No	No	No	-
62	Mcal_62	G232G8W04H045U_leg	167	Yes	I	-	-	No	No	No	-
63	Mcal_63	G232G8W04H0J0K_leg	425	Yes	I	-	-	Yes	No	No	-
64	Mcal_64	G232G8W04H0JU9_leg	212	Yes	I	C:GO:0005874; P:GO:0051258; P:GO:0006184; P:GO:0007017; F:GO:0003924; F:GO:0005200; C:GO:0005737; F:GO:0005525	-	Yes	Yes	No	-
65	Mcal_65	G232G8W04H0QOT_leg	266	Yes	I	-	-	Yes	No	No	-
66	Mcal_66	G232G8W04H0V2L_leg	394	Yes	I	-	NON_CYTOPLASMIC_DOMAIN (PHOBIUS); TRANSMEMBRANE (PHOBIUS); CYTOPLASMIC_DOMAIN (PHOBIUS); TMhelix (TMHMM)	Yes	No	No	-
67	Mcal_67	G232G8W04H10EO_leg	336	Yes	I	P:GO:0009058; F:GO:0016844; F:GO:0016829	IPR011042 (G3DSA:2.120.10.GENE3D); PTHR10426:SF4 (PANTHER); PTHR10426 (PANTHER); CYTOPLASMIC_DOMAIN (PHOBIUS); NON_CYTOPLASMIC_DOMAIN (PHOBIUS); TRANSMEMBRANE (PHOBIUS); TMhelix (TMHMM)	Yes	No	No	map00901
68	Mcal_68	G232G8W04H16D4_leg	170	Yes	I	-	-	No	No	No	-
69	Mcal_69	G232G8W04H16HV_leg	454	Yes	I	C:GO:0016021; P:GO:0055085	IPR011701 (PFAM); G3DSA:1.20.1250.20 (GENE3D); PTHR11360:SF119 (PANTHER); PTHR11360 (PANTHER); TRANSMEMBRANE (PHOBIUS); CYTOPLASMIC_DOMAIN (PHOBIUS); NON_CYTOPLASMIC_DOMAIN (PHOBIUS); TRANSMEMBRANE (PHOBIUS); CYTOPLASMIC_DOMAIN (PHOBIUS); TRANSMEMBRANE (PHOBIUS); NON_CYTOPLASMIC_DOMAIN (PHOBIUS); IPR016196 (SUPERFAMILY); TMhelix (TMHMM); TMhelix (TMHMM); TMhelix (TMHMM)	Yes	No	No	-
70	Mcal_70	G232G8W04H1B2G_leg	292	Yes	I	-	-	No	No	No	-
71	Mcal_71	G232G8W04H1CTJ_leg	339	Yes	I	-	NON_CYTOPLASMIC_DOMAIN (PHOBIUS); CYTOPLASMIC_DOMAIN (PHOBIUS); TRANSMEMBRANE (PHOBIUS)	No	No	No	-
72	Mcal_72	G232G8W04H1FKW_leg	268	Yes	I	-	SIGNAL_PEPTIDE_H_REGION (PHOBIUS); NON_CYTOPLASMIC_DOMAIN (PHOBIUS); SIGNAL_PEPTIDE_C_REGION (PHOBIUS); SIGNAL_PEPTIDE (PHOBIUS); SIGNAL_PEPTIDE_N_REGION (PHOBIUS); SignalP-noTM (SIGNALP_EUK)	No	No	No	-
73	Mcal_73	G232G8W04H1FU2_leg	351	Yes	I	-	SIGNAL_PEPTIDE_H_REGION (PHOBIUS); SIGNAL_PEPTIDE_C_REGION (PHOBIUS); SIGNAL_PEPTIDE_N_REGION (PHOBIUS); NON_CYTOPLASMIC_DOMAIN (PHOBIUS); SIGNAL_PEPTIDE (PHOBIUS); SignalP-noTM (SIGNALP_EUK); TMhelix (TMHMM)	No	No	No	-
74	Mcal_74	G232G8W04H1HRV_leg	289	Yes	I	-	NON_CYTOPLASMIC_DOMAIN (PHOBIUS); CYTOPLASMIC_DOMAIN (PHOBIUS); TRANSMEMBRANE (PHOBIUS); TMhelix (TMHMM)	Yes	No	No	-
75	Mcal_75	G232G8W04H1IRO_leg	231	Yes	I	-	-	No	No	No	-
76	Mcal_76	G232G8W04H1N12_leg	299	Yes	I	-	-	Yes	No	No	-
77	Mcal_77	G232G8W04H1U28_leg	263	Yes	I	-	NON_CYTOPLASMIC_DOMAIN (PHOBIUS); CYTOPLASMIC_DOMAIN (PHOBIUS); TRANSMEMBRANE (PHOBIUS)	Yes	No	No	-
78	Mcal_78	G232G8W04H1XWT_leg	385	Yes	I	-	-	Yes	No	No	-
79	Mcal_79	G232G8W04H20AK_leg	306	Yes	I	-	-	No	No	No	-
80	Mcal_80	G232G8W04H20GB_leg	327	Yes	I	-	-	No	No	No	-
81	Mcal_81	G232G8W04H20JT_leg	202	Yes	I	-	TMhelix (TMHMM)	No	No	No	-
82	Mcal_82	G232G8W04H27A4_leg	369	Yes	I	-	-	Yes	No	No	-
83	Mcal_83	G232G8W04H29VG_leg	390	Yes	I	F:GO:0004725; F:GO:0005200; C:GO:0008091; F:GO:0005543; F:GO:0003779; P:GO:0035335	Coil (COILS); IPR018159 (SMART); G3DSA:1.20.58.60 (GENE3D); IPR002017 (PFAM); PTHR11915 (PANTHER); PTHR11915:SF226 (PANTHER); SSF46966 (SUPERFAMILY)	Yes	No	No	-
84	Mcal_84	G232G8W04H2DO8_leg	355	Yes	I	F:GO:0005515	IPR006652 (PFAM); IPR015916 (G3DSA:2.130.10.GENE3D); PTHR24412 (PANTHER); SSF117281 (SUPERFAMILY)	Yes	Yes	No	-
85	Mcal_85	G232G8W04H2HSH_leg	347	Yes	I	-	-	No	No	No	-
86	Mcal_86	G232G8W04H2HTK_leg	317	Yes	I	P:GO:0055114; F:GO:0005506; F:GO:0016705; F:GO:0020037	IPR001128 (PFAM); IPR001128 (G3DSA:1.10.630.GENE3D); PTHR24292 (PANTHER); SignalP-noTM (SIGNALP_EUK); IPR001128 (SUPERFAMILY)	Yes	No	No	-
87	Mcal_87	G232G8W04H2I02_leg	387	Yes	I	C:GO:0016020	IPR001727 (PFAM); IPR001727 (PANTHER); TRANSMEMBRANE (PHOBIUS); CYTOPLASMIC_DOMAIN (PHOBIUS); CYTOPLASMIC_DOMAIN (PHOBIUS); NON_CYTOPLASMIC_DOMAIN (PHOBIUS); TRANSMEMBRANE (PHOBIUS); TMhelix (TMHMM); TMhelix (TMHMM)	Yes	No	No	-
88	Mcal_88	G232G8W04H2JON_leg	218	Yes	I	C:GO:0044424	-	Yes	No	No	-
89	Mcal_89	G232G8W04H2N15_leg	156	Yes	I	-	SIGNAL_PEPTIDE_N_REGION (PHOBIUS); SIGNAL_PEPTIDE_H_REGION (PHOBIUS); SIGNAL_PEPTIDE (PHOBIUS); SIGNAL_PEPTIDE_C_REGION (PHOBIUS); NON_CYTOPLASMIC_DOMAIN (PHOBIUS)	No	No	No	-
90	Mcal_90	G232G8W04H2OLS_leg	338	Yes	I	-	-	No	No	No	-
91	Mcal_91	G232G8W04H2UDL_leg	202	Yes	I	F:GO:0003677	IPR009057 (G3DSA:1.10.10.GENE3D); SSF109715 (SUPERFAMILY)	Yes	No	No	-
92	Mcal_92	G232G8W04H2Z2U_leg	339	Yes	I	-	SignalP-noTM (SIGNALP_EUK)	Yes	No	No	-
93	Mcal_93	G232G8W04H33PL_leg	115	Yes	I	-	-	No	No	No	-
94	Mcal_94	G232G8W04H36U4_leg	213	Yes	I	-	-	No	No	No	-
95	Mcal_95	G232G8W04H37AG_leg	248	Yes	I	F:GO:0004687; P:GO:0006468; F:GO:0005524	-	Yes	Yes	No	-
96	Mcal_96	G232G8W04H3B3G_leg	265	Yes	I	-	-	No	No	No	-
97	Mcal_97	G232G8W04H3C0W_leg	351	Yes	I	-	CYTOPLASMIC_DOMAIN (PHOBIUS); TRANSMEMBRANE (PHOBIUS); NON_CYTOPLASMIC_DOMAIN (PHOBIUS); TMhelix (TMHMM)	No	No	No	-
98	Mcal_98	G232G8W04H3FI9_leg	209	Yes	I	-	CYTOPLASMIC_DOMAIN (PHOBIUS); NON_CYTOPLASMIC_DOMAIN (PHOBIUS); TRANSMEMBRANE (PHOBIUS); TMhelix (TMHMM)	No	No	No	-
99	Mcal_99	G232G8W04H3UYW_leg	125	Yes	I	-	-	No	No	No	-
100	Mcal_100	G232G8W04H3V68_leg	314	Yes	I	-	-	No	No	No	-
101	Mcal_101	G232G8W04H3VXO_leg	141	Yes	I	-	-	No	No	No	-
102	Mcal_102	G232G8W04H41YN_leg	249	Yes	I	P:GO:0016197; P:GO:0000724; C:GO:0030119	IPR029392 (PFAM); IPR029392 (PANTHER); PTHR16120:SF0 (PANTHER)	Yes	No	No	-
103	Mcal_103	G232G8W04H43MK_leg	383	Yes	I	-	SIGNAL_PEPTIDE_N_REGION (PHOBIUS); SIGNAL_PEPTIDE_C_REGION (PHOBIUS); SIGNAL_PEPTIDE_H_REGION (PHOBIUS); CYTOPLASMIC_DOMAIN (PHOBIUS); TRANSMEMBRANE (PHOBIUS); SIGNAL_PEPTIDE (PHOBIUS); NON_CYTOPLASMIC_DOMAIN (PHOBIUS); SignalP-TM (SIGNALP_GRAM_POSITIVE); SignalP-TM (SIGNALP_EUK); TMhelix (TMHMM); TMhelix (TMHMM); TMhelix (TMHMM)	Yes	No	No	-
104	Mcal_104	G232G8W04H44R2_leg	296	Yes	I	-	CYTOPLASMIC_DOMAIN (PHOBIUS); NON_CYTOPLASMIC_DOMAIN (PHOBIUS); TRANSMEMBRANE (PHOBIUS)	Yes	No	No	-
105	Mcal_105	G232G8W04H48VD_leg	112	Yes	I	-	-	No	No	No	-
106	Mcal_106	G232G8W04H49K2_leg	306	Yes	I	-	-	Yes	No	No	-
107	Mcal_107	G232G8W04H4AXR_leg	421	Yes	I	-	-	Yes	No	No	-
108	Mcal_108	G232G8W04H4BB6_leg	324	Yes	I	-	-	No	No	No	-
109	Mcal_109	G232G8W04H4DLJ_leg	319	Yes	I	-	-	Yes	No	No	-
110	Mcal_110	G232G8W04H4FGI_leg	161	Yes	I	-	CYTOPLASMIC_DOMAIN (PHOBIUS); NON_CYTOPLASMIC_DOMAIN (PHOBIUS); TRANSMEMBRANE (PHOBIUS)	Yes	No	No	-
111	Mcal_111	G232G8W04H4HB2_leg	392	Yes	I	-	G3DSA:1.10.8.60 (GENE3D); IPR027417 (G3DSA:3.40.50.GENE3D); PTHR23077:SF69 (PANTHER); PTHR23077 (PANTHER); IPR027417 (SUPERFAMILY)	Yes	Yes	Yes	-
112	Mcal_112	G232G8W04H4JY5_leg	368	Yes	I	-	-	No	No	No	-
113	Mcal_113	G232G8W04H4L5D_leg	276	Yes	I	-	-	Yes	No	No	-
114	Mcal_114	G232G8W04H4MUA_leg	278	Yes	I	-	-	No	No	No	-
115	Mcal_115	G232G8W04H4N5Y_leg	278	Yes	I	C:GO:0005856; C:GO:0005737; F:GO:0005524	-	Yes	Yes	Yes	-
116	Mcal_116	G232G8W04H4NOG_leg	172	Yes	I	-	-	No	No	No	-
117	Mcal_117	G232G8W04H4QFK_leg	297	Yes	I	-	-	Yes	No	No	-
118	Mcal_118	G232G8W04H4S50_leg	104	Yes	I	-	-	No	No	No	-
119	Mcal_119	G232G8W04H4SIV_leg	339	Yes	I	-	Coil (COILS)	Yes	No	No	-
120	Mcal_120	G232G8W04H4V7V_leg	101	Yes	I	-	-	No	No	No	-
121	Mcal_121	G232G8W04H4VNS_leg	405	Yes	I	-	-	No	No	No	-
122	Mcal_122	G232G8W04H51PW_leg	277	Yes	I	-	-	Yes	No	No	-
123	Mcal_123	G232G8W04H52EE_leg	329	Yes	I	-	-	No	No	No	-
124	Mcal_124	G232G8W04H52T6_leg	315	Yes	I	-	-	No	No	No	-
125	Mcal_125	G232G8W04H53IN_leg	312	Yes	I	-	-	Yes	Yes	No	-
126	Mcal_126	G232G8W04H58I1_leg	364	Yes	I	-	PTHR21024 (PANTHER); PTHR21024:SF0 (PANTHER)	Yes	No	No	-
127	Mcal_127	G232G8W04H5AA8_leg	341	Yes	I	C:GO:0005743; C:GO:0070469; F:GO:0008137; C:GO:0016021; P:GO:0042773	-	Yes	No	No	map00190
128	Mcal_128	G232G8W04H5AGH_leg	306	Yes	I	-	-	No	No	No	-
129	Mcal_129	G232G8W04H5BDA_leg	447	Yes	I	F:GO:0003676; F:GO:0005524; F:GO:0008026	PTHR18934:SF84 (PANTHER); PTHR18934 (PANTHER)	Yes	Yes	Yes	-
130	Mcal_130	G232G8W04H5DMB_leg	387	Yes	I	-	TRANSMEMBRANE (PHOBIUS); CYTOPLASMIC_DOMAIN (PHOBIUS); NON_CYTOPLASMIC_DOMAIN (PHOBIUS); TMhelix (TMHMM)	No	No	No	-
131	Mcal_131	G232G8W04H5F6W_leg	293	Yes	I	-	-	No	No	No	-
132	Mcal_132	G232G8W04H5ID0_leg	132	Yes	I	-	-	Yes	No	No	-
133	Mcal_133	G232G8W04H5JRN_leg	367	Yes	I	F:GO:0017134	-	Yes	No	No	-
134	Mcal_134	G232G8W04H5KDP_leg	180	Yes	I	P:GO:0007155	-	Yes	No	No	-
135	Mcal_135	G232G8W04H5M9P_leg	396	Yes	I	F:GO:0005507; C:GO:0005615; F:GO:0031404; F:GO:0005344; F:GO:0016491; P:GO:0015671; P:GO:0055114	IPR000896 (PFAM); IPR027417 (G3DSA:3.40.50.GENE3D); IPR008922 (G3DSA:1.10.1280.GENE3D); IPR027417 (G3DSA:3.40.50.GENE3D); PTHR24031:SF219 (PANTHER); PTHR24031 (PANTHER); IPR013788 (PROSITE_PATTERNS); IPR002227 (PROSITE_PATTERNS); IPR008922 (SUPERFAMILY); IPR027417 (SUPERFAMILY)	Yes	Yes	Yes	-
136	Mcal_136	G232G8W04H5MT7_leg	117	Yes	I	-	-	Yes	No	No	-
137	Mcal_137	G232G8W04H5MUO_leg	422	Yes	I	-	-	No	No	No	-
138	Mcal_138	G232G8W04H5NSK_leg	364	Yes	I	-	-	Yes	No	No	-
139	Mcal_139	G232G8W04H5NT4_leg	168	Yes	I	-	-	No	No	No	-
140	Mcal_140	G232G8W04H5QF8_leg	318	Yes	I	-	-	Yes	No	No	-
141	Mcal_141	G232G8W04H5R8E_leg	360	Yes	I	-	CYTOPLASMIC_DOMAIN (PHOBIUS); TRANSMEMBRANE (PHOBIUS); NON_CYTOPLASMIC_DOMAIN (PHOBIUS)	Yes	No	No	-
142	Mcal_142	G232G8W04H5VA3_leg	337	Yes	I	-	-	No	No	No	-
143	Mcal_143	G232G8W04H6105_leg	323	Yes	I	-	-	No	No	No	-
144	Mcal_144	G232G8W04H62EW_leg	333	Yes	I	-	IPR029063 (G3DSA:3.40.50.GENE3D); IPR026170 (PANTHER); PTHR13610:SF3 (PANTHER); IPR029063 (SUPERFAMILY)	Yes	Yes	No	-
145	Mcal_145	G232G8W04H62KM_leg	225	Yes	I	-	NON_CYTOPLASMIC_DOMAIN (PHOBIUS); TRANSMEMBRANE (PHOBIUS); CYTOPLASMIC_DOMAIN (PHOBIUS); TMhelix (TMHMM)	No	No	No	-
146	Mcal_146	G232G8W04H65B1_leg	321	Yes	I	-	-	No	No	No	-
147	Mcal_147	G232G8W04H65G0_leg	134	Yes	I	-	TRANSMEMBRANE (PHOBIUS); NON_CYTOPLASMIC_DOMAIN (PHOBIUS); CYTOPLASMIC_DOMAIN (PHOBIUS); TMhelix (TMHMM)	No	No	No	-
148	Mcal_148	G232G8W04H67P5_leg	426	Yes	I	-	IPR013783 (G3DSA:2.60.40.GENE3D); IPR013783 (G3DSA:2.60.40.GENE3D); SSF48726 (SUPERFAMILY)	Yes	No	No	-
149	Mcal_149	G232G8W04H67S2_leg	151	Yes	I	F:GO:0003824; P:GO:0008152	IPR029061 (G3DSA:3.40.50.GENE3D); IPR005474 (PFAM); PTHR11624 (PANTHER); PTHR11624:SF2 (PANTHER); IPR029061 (SUPERFAMILY)	Yes	No	Yes	-
150	Mcal_150	G232G8W04H697O_leg	210	Yes	I	-	-	No	No	No	-
151	Mcal_151	G232G8W04H6BA8_leg	282	Yes	I	-	-	No	No	No	-
152	Mcal_152	G232G8W04H6CMK_leg	420	Yes	I	-	-	Yes	No	No	-
153	Mcal_153	G232G8W04H6DD3_leg	390	Yes	I	P:GO:0008152	-	Yes	Yes	No	-
154	Mcal_154	G232G8W04H6F0F_leg	200	Yes	I	-	-	No	No	No	-
155	Mcal_155	G232G8W04H6F8D_leg	393	Yes	I	P:GO:0006303; C:GO:0043564; P:GO:0000723; F:GO:0042162; F:GO:0003684	IPR027388 (G3DSA:4.10.970.GENE3D); IPR006164 (PFAM); IPR006165 (PTHR12604:PANTHER); PTHR12604 (PANTHER); IPR016194 (SUPERFAMILY)	Yes	No	No	-
156	Mcal_156	G232G8W04H6HZG_leg	193	Yes	I	-	-	Yes	No	No	-
157	Mcal_157	G232G8W04H6I2F_leg	380	Yes	I	-	Coil (COILS)	Yes	No	No	-
158	Mcal_158	G232G8W04H6JMP_leg	299	Yes	I	-	-	No	No	No	-
159	Mcal_159	G232G8W04H6O45_leg	279	Yes	I	-	-	No	No	No	-
160	Mcal_160	G232G8W04H6S36_leg	358	Yes	I	-	SIGNAL_PEPTIDE_N_REGION (PHOBIUS); SIGNAL_PEPTIDE_C_REGION (PHOBIUS); SIGNAL_PEPTIDE (PHOBIUS); SIGNAL_PEPTIDE_H_REGION (PHOBIUS); NON_CYTOPLASMIC_DOMAIN (PHOBIUS)	No	No	No	-
161	Mcal_161	G232G8W04H6XDI_leg	188	Yes	I	-	-	No	No	No	-
162	Mcal_162	G232G8W04H6XKA_leg	407	Yes	I	-	-	No	No	No	-
163	Mcal_163	G232G8W04H6XOJ_leg	119	Yes	I	-	-	No	No	No	-
164	Mcal_164	G232G8W04H6XVE_leg	340	Yes	I	-	-	No	No	No	-
165	Mcal_165	G232G8W04H6ZJS_leg	169	Yes	I	-	-	No	No	No	-
166	Mcal_166	G232G8W04H71UZ_leg	246	Yes	I	-	PF15228 (PFAM)	Yes	No	No	-
167	Mcal_167	G232G8W04H74M9_leg	368	Yes	I	-	-	No	No	No	-
168	Mcal_168	G232G8W04H7549_leg	359	Yes	I	-	-	Yes	No	Yes	-
169	Mcal_169	G232G8W04H75XX_leg	245	Yes	I	-	TMhelix (TMHMM)	No	No	No	-
170	Mcal_170	G232G8W04H7AUX_leg	394	Yes	I	-	SIGNAL_PEPTIDE_N_REGION (PHOBIUS); SIGNAL_PEPTIDE_C_REGION (PHOBIUS); SIGNAL_PEPTIDE (PHOBIUS); SIGNAL_PEPTIDE_H_REGION (PHOBIUS); NON_CYTOPLASMIC_DOMAIN (PHOBIUS); SignalP-noTM (SIGNALP_EUK)	No	No	No	-
171	Mcal_171	G232G8W04H7BBT_leg	249	Yes	I	-	NON_CYTOPLASMIC_DOMAIN (PHOBIUS); CYTOPLASMIC_DOMAIN (PHOBIUS); TRANSMEMBRANE (PHOBIUS); TMhelix (TMHMM)	No	No	No	-
172	Mcal_172	G232G8W04H7E5J_leg	444	Yes	I	F:GO:0004743; P:GO:0016310; F:GO:0030955; F:GO:0000287; P:GO:0006096	IPR015806 (G3DSA:2.40.33.GENE3D); IPR015793 (PFAM); IPR001697 (PANTHER); PTHR11817:SF16 (PANTHER); IPR011037 (SUPERFAMILY)	Yes	No	No	map00230 map00620 map00010
173	Mcal_173	G232G8W04H7IDF_leg	225	Yes	I	-	-	No	No	No	-
174	Mcal_174	G232G8W04H7JNY_leg	351	Yes	I	F:GO:0004252; P:GO:0006508	G3DSA:2.40.10.10 (GENE3D); IPR001254 (PFAM); PTHR24268:SF81 (PANTHER); PTHR24268 (PANTHER); IPR001254 (PROSITE_PROFILES); IPR009003 (SUPERFAMILY)	Yes	No	No	-
175	Mcal_175	G232G8W04H7N92_leg	113	Yes	I	-	-	No	No	No	-
176	Mcal_176	G232G8W04H7NLB_leg	371	Yes	I	-	-	Yes	No	No	-
177	Mcal_177	G232G8W04H7OFQ_leg	345	Yes	I	-	SignalP-noTM (SIGNALP_EUK)	No	No	No	-
178	Mcal_178	G232G8W04H7TN0_leg	110	Yes	I	-	-	No	No	No	-
179	Mcal_179	G232G8W04H7TNY_leg	158	Yes	I	F:GO:0050660; C:GO:0005777; P:GO:0006631; F:GO:0003995; F:GO:0003997; P:GO:0055114	G3DSA:1.20.140.10 (GENE3D); PTHR10909 (PANTHER); PTHR10909:SF11 (PANTHER); IPR009075 (SUPERFAMILY)	Yes	No	No	map00592 map01040 map00071
180	Mcal_180	G232G8W04H7UG6_leg	140	Yes	I	-	-	No	No	No	-
181	Mcal_181	G232G8W04H8055_leg	253	Yes	I	-	CYTOPLASMIC_DOMAIN (PHOBIUS); NON_CYTOPLASMIC_DOMAIN (PHOBIUS); TRANSMEMBRANE (PHOBIUS); TMhelix (TMHMM)	No	No	No	-
182	Mcal_182	G232G8W04H81MB_leg	485	Yes	I	-	-	No	No	No	-
183	Mcal_183	G232G8W04H823E_leg	146	Yes	I	-	-	No	No	No	-
184	Mcal_184	G232G8W04H829N_leg	183	Yes	I	F:GO:0008137; P:GO:0042773; C:GO:0005739	-	Yes	No	No	map00190
185	Mcal_185	G232G8W04H8IQ7_leg	375	Yes	I	-	SIGNAL_PEPTIDE_C_REGION (PHOBIUS); NON_CYTOPLASMIC_DOMAIN (PHOBIUS); SIGNAL_PEPTIDE_N_REGION (PHOBIUS); SIGNAL_PEPTIDE_H_REGION (PHOBIUS); SIGNAL_PEPTIDE (PHOBIUS); SignalP-noTM (SIGNALP_EUK); TMhelix (TMHMM)	Yes	No	No	-
186	Mcal_186	G232G8W04H8MOZ_leg	378	Yes	I	-	-	No	No	No	-
187	Mcal_187	G232G8W04H8QAS_leg	185	Yes	I	-	-	No	No	No	-
188	Mcal_188	G232G8W04H8QFL_leg	172	Yes	I	-	-	No	No	No	-
189	Mcal_189	G232G8W04H8QH5_leg	400	Yes	I	F:GO:0003676; C:GO:0030529; F:GO:0000166	IPR012677 (G3DSA:3.30.70.GENE3D); PTHR24012 (PANTHER); PTHR24012:SF259 (PANTHER); SSF54928 (SUPERFAMILY)	Yes	Yes	No	-
190	Mcal_190	G232G8W04H8QRA_leg	100	Yes	I	-	-	No	No	No	-
191	Mcal_191	G232G8W04H8U7G_leg	218	Yes	I	F:GO:0051539; P:GO:0008152	SIGNAL_PEPTIDE_N_REGION (PHOBIUS); SIGNAL_PEPTIDE_C_REGION (PHOBIUS); SIGNAL_PEPTIDE (PHOBIUS); SIGNAL_PEPTIDE_H_REGION (PHOBIUS); NON_CYTOPLASMIC_DOMAIN (PHOBIUS)	Yes	Yes	No	-
192	Mcal_192	G232G8W04H94OL_leg	364	Yes	I	F:GO:0015035	IPR012336 (G3DSA:3.40.30.GENE3D); IPR001853 (PFAM); PTHR13887 (PANTHER); IPR012336 (SUPERFAMILY)	Yes	No	No	-
193	Mcal_193	G232G8W04H9619_leg	207	Yes	I	F:GO:0008239; P:GO:0006508; C:GO:0005737	PF03571 (PFAM); PTHR23422:SF10 (PANTHER); PTHR23422 (PANTHER)	Yes	No	No	-
194	Mcal_194	G232G8W04H9AYZ_leg	352	Yes	I	-	Coil (COILS); SSF90257 (SUPERFAMILY)	Yes	No	No	-
195	Mcal_195	G232G8W04H9G2K_leg	273	Yes	I	-	TRANSMEMBRANE (PHOBIUS); CYTOPLASMIC_DOMAIN (PHOBIUS); NON_CYTOPLASMIC_DOMAIN (PHOBIUS); TMhelix (TMHMM)	No	No	No	-
196	Mcal_196	G232G8W04H9H4L_leg	224	Yes	I	-	-	No	No	No	-
197	Mcal_197	G232G8W04H9H97_leg	335	Yes	I	-	-	No	No	No	-
198	Mcal_198	G232G8W04H9IC4_leg	229	Yes	I	-	-	No	No	No	-
199	Mcal_199	G232G8W04H9IYM_leg	199	Yes	I	-	-	No	No	No	-
200	Mcal_200	G232G8W04H9JPI_leg	101	Yes	I	-	CYTOPLASMIC_DOMAIN (PHOBIUS); NON_CYTOPLASMIC_DOMAIN (PHOBIUS); TRANSMEMBRANE (PHOBIUS); TMhelix (TMHMM)	No	No	No	-
201	Mcal_201	G232G8W04H9JR4_leg	122	Yes	I	-	-	No	No	No	-
202	Mcal_202	G232G8W04H9LU6_leg	409	Yes	I	-	-	Yes	No	No	-
203	Mcal_203	G232G8W04H9OFW_leg	192	Yes	I	F:GO:0032440; P:GO:0055114; F:GO:0016779	IPR029044 (G3DSA:3.90.550.GENE3D); IPR002618 (PANTHER); PTHR11952:SF4 (PANTHER); IPR029044 (SUPERFAMILY)	Yes	Yes	No	-
204	Mcal_204	G232G8W04H9U8Q_leg	342	Yes	I	-	SignalP-noTM (SIGNALP_EUK)	No	No	No	-
205	Mcal_205	G232G8W04H9UDM_leg	208	Yes	I	-	-	Yes	No	No	-
206	Mcal_206	G232G8W04H9UJW_leg	396	Yes	I	-	-	Yes	No	No	-
207	Mcal_207	G232G8W04H9VH8_leg	420	Yes	I	-	-	Yes	No	No	-
208	Mcal_208	G232G8W04H9X7M_leg	172	Yes	I	-	-	No	No	No	-
209	Mcal_209	G232G8W04H9Z1N_leg	369	Yes	I	-	-	No	No	No	-
210	Mcal_210	G232G8W04I0ADF_leg	314	Yes	I	-	NON_CYTOPLASMIC_DOMAIN (PHOBIUS); TRANSMEMBRANE (PHOBIUS); CYTOPLASMIC_DOMAIN (PHOBIUS)	Yes	No	No	-
211	Mcal_211	G232G8W04I0E1L_leg	124	Yes	I	-	-	No	No	No	-
212	Mcal_212	G232G8W04I0E63_leg	393	Yes	I	F:GO:0004862; P:GO:0006469	SignalP-TM (SIGNALP_GRAM_POSITIVE)	Yes	No	No	-
213	Mcal_213	G232G8W04I0LPW_leg	393	Yes	I	C:GO:0071203	IPR019393 (PFAM); PTHR15691:SF6 (PANTHER); IPR019393 (PANTHER)	Yes	No	No	-
214	Mcal_214	G232G8W04I0QDR_leg	287	Yes	I	F:GO:0004252; P:GO:0006508	-	Yes	No	No	-
215	Mcal_215	G232G8W04I0QKL_leg	221	Yes	I	-	-	No	No	No	-
216	Mcal_216	G232G8W04I0S9F_leg	274	Yes	I	-	-	No	No	No	-
217	Mcal_217	G232G8W04I0UWD_leg	345	Yes	I	-	-	No	No	No	-
218	Mcal_218	G232G8W04I0V03_leg	118	Yes	I	C:GO:0071797; P:GO:0016567; F:GO:0004842; F:GO:0008270	SIGNAL_PEPTIDE_C_REGION (PHOBIUS); SIGNAL_PEPTIDE_N_REGION (PHOBIUS); SIGNAL_PEPTIDE_H_REGION (PHOBIUS); SIGNAL_PEPTIDE (PHOBIUS); NON_CYTOPLASMIC_DOMAIN (PHOBIUS); TMhelix (TMHMM)	Yes	No	No	-
219	Mcal_219	G232G8W04I0W50_leg	125	Yes	I	-	-	No	No	No	-
220	Mcal_220	G232G8W04I0WTV_leg	268	Yes	I	-	-	No	No	No	-
221	Mcal_221	G232G8W04I0YU2_leg	224	Yes	I	-	-	No	No	No	-
222	Mcal_222	G232G8W04I11IT_leg	356	Yes	I	-	NON_CYTOPLASMIC_DOMAIN (PHOBIUS); CYTOPLASMIC_DOMAIN (PHOBIUS); TRANSMEMBRANE (PHOBIUS); TMhelix (TMHMM)	Yes	No	No	-
223	Mcal_223	G232G8W04I120G_leg	259	Yes	I	-	NON_CYTOPLASMIC_DOMAIN (PHOBIUS); CYTOPLASMIC_DOMAIN (PHOBIUS); TRANSMEMBRANE (PHOBIUS); TMhelix (TMHMM)	No	No	No	-
224	Mcal_224	G232G8W04I147P_leg	437	Yes	I	-	CYTOPLASMIC_DOMAIN (PHOBIUS); SIGNAL_PEPTIDE_N_REGION (PHOBIUS); SIGNAL_PEPTIDE_C_REGION (PHOBIUS); SIGNAL_PEPTIDE (PHOBIUS); SIGNAL_PEPTIDE_H_REGION (PHOBIUS); NON_CYTOPLASMIC_DOMAIN (PHOBIUS); TRANSMEMBRANE (PHOBIUS); SignalP-noTM (SIGNALP_EUK); TMhelix (TMHMM); TMhelix (TMHMM)	Yes	Yes	No	-
225	Mcal_225	G232G8W04I15CP_leg	132	Yes	I	-	CYTOPLASMIC_DOMAIN (PHOBIUS); TRANSMEMBRANE (PHOBIUS); NON_CYTOPLASMIC_DOMAIN (PHOBIUS)	No	No	No	-
226	Mcal_226	G232G8W04I16P6_leg	359	Yes	I	-	TRANSMEMBRANE (PHOBIUS); CYTOPLASMIC_DOMAIN (PHOBIUS); NON_CYTOPLASMIC_DOMAIN (PHOBIUS); TMhelix (TMHMM)	No	No	No	-
227	Mcal_227	G232G8W04I1BRN_leg	131	Yes	I	-	-	No	No	No	-
228	Mcal_228	G232G8W04I1FK7_leg	379	Yes	I	F:GO:0005507; P:GO:0055070	IPR023648 (G3DSA:3.20.20.GENE3D); IPR005627 (PANTHER); PTHR12598:SF0 (PANTHER); IPR023648 (SUPERFAMILY)	Yes	No	No	-
229	Mcal_229	G232G8W04I1SLO_leg	484	Yes	I	C:GO:0005739	IPR027450 (G3DSA:2.60.120.GENE3D); PTHR21052 (PANTHER); PTHR21052:SF0 (PANTHER); SSF51197 (SUPERFAMILY)	Yes	No	No	-
230	Mcal_230	G232G8W04I1TBC_leg	261	Yes	I	-	CYTOPLASMIC_DOMAIN (PHOBIUS); NON_CYTOPLASMIC_DOMAIN (PHOBIUS); TRANSMEMBRANE (PHOBIUS); TMhelix (TMHMM)	Yes	No	No	-
231	Mcal_231	G232G8W04I1W6N_leg	432	Yes	I	F:GO:0005507; C:GO:0005615; F:GO:0031404; F:GO:0005344; F:GO:0016491; P:GO:0015671; P:GO:0055114	IPR005203 (PFAM); IPR005203 (G3DSA:2.60.40.GENE3D); G3DSA:3.30.420.40 (GENE3D); IPR014756 (SUPERFAMILY)	Yes	No	No	-
232	Mcal_232	G232G8W04I1ZJK_leg	118	Yes	I	-	TRANSMEMBRANE (PHOBIUS); CYTOPLASMIC_DOMAIN (PHOBIUS); NON_CYTOPLASMIC_DOMAIN (PHOBIUS); TMhelix (TMHMM)	No	No	No	-
233	Mcal_233	G232G8W04I22LO_leg	155	Yes	I	-	TRANSMEMBRANE (PHOBIUS); CYTOPLASMIC_DOMAIN (PHOBIUS); NON_CYTOPLASMIC_DOMAIN (PHOBIUS)	No	No	No	-
234	Mcal_234	G232G8W04I23SJ_leg	281	Yes	I	-	TRANSMEMBRANE (PHOBIUS); NON_CYTOPLASMIC_DOMAIN (PHOBIUS); CYTOPLASMIC_DOMAIN (PHOBIUS); TMhelix (TMHMM)	No	No	No	-
235	Mcal_235	G232G8W04I26O2_leg	447	Yes	I	F:GO:0005515	IPR001478 (SMART); IPR001478 (PFAM); IPR001478 (G3DSA:2.30.42.GENE3D); PTHR19964 (PANTHER); PTHR19964:SF22 (PANTHER); IPR001478 (PROSITE_PROFILES); IPR001478 (SUPERFAMILY)	Yes	Yes	No	-
236	Mcal_236	G232G8W04I2DLI_leg	383	Yes	I	C:GO:0016020; F:GO:0004571; F:GO:0005509	IPR001382 (G3DSA:1.50.10.GENE3D); IPR001382 (PFAM); PTHR11742:SF25 (PANTHER); IPR001382 (PANTHER); IPR001382 (SUPERFAMILY)	Yes	Yes	No	map00513 map00510
237	Mcal_237	G232G8W04I2DTZ_leg	382	Yes	I	-	-	No	No	No	-
238	Mcal_238	G232G8W04I2GJD_leg	424	Yes	I	-	CYTOPLASMIC_DOMAIN (PHOBIUS); TRANSMEMBRANE (PHOBIUS); NON_CYTOPLASMIC_DOMAIN (PHOBIUS); TMhelix (TMHMM)	Yes	No	No	-
239	Mcal_239	G232G8W04I2H0I_leg	182	Yes	I	F:GO:0004252; P:GO:0006508	-	Yes	No	No	-
240	Mcal_240	G232G8W04I2HXU_leg	213	Yes	I	P:GO:0055114; P:GO:0045454; F:GO:0016491; F:GO:0050660	-	Yes	No	No	-
241	Mcal_241	G232G8W04I2HXZ_leg	290	Yes	I	-	-	Yes	No	No	-
242	Mcal_242	G232G8W04I2IPZ_leg	255	Yes	I	P:GO:0006406; F:GO:0008026; C:GO:0005737; F:GO:0003676; P:GO:0006200; P:GO:0000398; C:GO:0005634; F:GO:0005524	-	Yes	Yes	Yes	-
243	Mcal_243	G232G8W04I2JU0_leg	239	Yes	I	-	-	No	No	No	-
244	Mcal_244	G232G8W04I2K7Y_leg	382	Yes	I	-	-	No	No	No	-
245	Mcal_245	G232G8W04I2K8C_leg	185	Yes	I	-	-	Yes	No	No	-
246	Mcal_246	G232G8W04I301V_leg	125	Yes	I	-	SIGNAL_PEPTIDE_N_REGION (PHOBIUS); SIGNAL_PEPTIDE (PHOBIUS); SIGNAL_PEPTIDE_C_REGION (PHOBIUS); NON_CYTOPLASMIC_DOMAIN (PHOBIUS); SIGNAL_PEPTIDE_H_REGION (PHOBIUS)	No	No	No	-
247	Mcal_247	G232G8W04I31KY_leg	159	Yes	I	-	NON_CYTOPLASMIC_DOMAIN (PHOBIUS); TRANSMEMBRANE (PHOBIUS); CYTOPLASMIC_DOMAIN (PHOBIUS)	No	No	No	-
248	Mcal_248	G232G8W04I31SX_leg	138	Yes	I	-	-	Yes	Yes	Yes	-
249	Mcal_249	G232G8W04I351I_leg	313	Yes	I	-	TRANSMEMBRANE (PHOBIUS); CYTOPLASMIC_DOMAIN (PHOBIUS); NON_CYTOPLASMIC_DOMAIN (PHOBIUS)	No	No	No	-
250	Mcal_250	G232G8W04I381Q_leg	111	Yes	I	-	-	No	No	No	-
251	Mcal_251	G232G8W04I38JJ_leg	282	Yes	I	F:GO:0005515	PR00014 (PRINTS); IPR003961 (PFAM); IPR013783 (G3DSA:2.60.40.GENE3D); PTHR19897:SF155 (PANTHER); PTHR19897 (PANTHER); IPR003961 (PROSITE_PROFILES); IPR003961 (SUPERFAMILY)	Yes	Yes	No	-
252	Mcal_252	G232G8W04I3A25_leg	369	Yes	I	F:GO:0016747	-	Yes	No	No	-
253	Mcal_253	G232G8W04I3BJR_leg	408	Yes	I	-	-	No	No	No	-
254	Mcal_254	G232G8W04I3CMU_leg	336	Yes	I	P:GO:0006184; F:GO:0003924; F:GO:0005525; P:GO:0051258; P:GO:0007017; C:GO:0005874	IPR018316 (SMART); IPR018316 (G3DSA:3.30.1330.GENE3D); IPR018316 (PFAM); IPR003008 (G3DSA:3.40.50.GENE3D); IPR000217 (PANTHER); TRANSMEMBRANE (PHOBIUS); NON_CYTOPLASMIC_DOMAIN (PHOBIUS); CYTOPLASMIC_DOMAIN (PHOBIUS); IPR008280 (SUPERFAMILY); TMhelix (TMHMM)	Yes	Yes	Yes	-
255	Mcal_255	G232G8W04I3CN5_leg	423	Yes	I	-	CYTOPLASMIC_DOMAIN (PHOBIUS); TRANSMEMBRANE (PHOBIUS); NON_CYTOPLASMIC_DOMAIN (PHOBIUS); TMhelix (TMHMM)	No	No	No	-
256	Mcal_256	G232G8W04I3F9U_leg	322	Yes	I	-	-	No	No	No	-
257	Mcal_257	G232G8W04I3GC8_leg	248	Yes	I	-	TRANSMEMBRANE (PHOBIUS); CYTOPLASMIC_DOMAIN (PHOBIUS); NON_CYTOPLASMIC_DOMAIN (PHOBIUS); TMhelix (TMHMM)	No	No	No	-
258	Mcal_258	G232G8W04I3MAR_leg	414	Yes	I	C:GO:0005840; F:GO:0003735; P:GO:0006412	-	Yes	No	Yes	-
259	Mcal_259	G232G8W04I3OBE_leg	363	Yes	I	-	SIGNAL_PEPTIDE_N_REGION (PHOBIUS); SIGNAL_PEPTIDE_C_REGION (PHOBIUS); NON_CYTOPLASMIC_DOMAIN (PHOBIUS); SIGNAL_PEPTIDE (PHOBIUS); SIGNAL_PEPTIDE_H_REGION (PHOBIUS)	No	No	No	-
260	Mcal_260	G232G8W04I3PL2_leg	195	Yes	I	-	-	Yes	No	No	-
261	Mcal_261	G232G8W04I3PMG_leg	148	Yes	I	-	-	No	No	No	-
262	Mcal_262	G232G8W04I3QCZ_leg	277	Yes	I	-	-	No	No	No	-
263	Mcal_263	G232G8W04I3S7K_leg	318	Yes	I	-	TRANSMEMBRANE (PHOBIUS); CYTOPLASMIC_DOMAIN (PHOBIUS); NON_CYTOPLASMIC_DOMAIN (PHOBIUS); TMhelix (TMHMM)	No	No	No	-
264	Mcal_264	G232G8W04I3SFQ_leg	140	Yes	I	-	-	No	No	No	-
265	Mcal_265	G232G8W04I3TIL_leg	146	Yes	I	-	-	No	No	No	-
266	Mcal_266	G232G8W04I3U80_leg	411	Yes	I	-	IPR022771 (PFAM)	Yes	No	No	-
267	Mcal_267	G232G8W04I3Y0E_leg	335	Yes	I	-	-	No	No	No	-
268	Mcal_268	G232G8W04I42V2_leg	349	Yes	I	P:GO:0045454; F:GO:0050660; F:GO:0016491; P:GO:0055114; F:GO:0046983	IPR029324 (PFAM); G3DSA:3.50.50.60 (GENE3D); PTHR22912 (PANTHER); PTHR22912:SF33 (PANTHER); CYTOPLASMIC_DOMAIN (PHOBIUS); NON_CYTOPLASMIC_DOMAIN (PHOBIUS); TRANSMEMBRANE (PHOBIUS); SSF51905 (SUPERFAMILY); TMhelix (TMHMM)	Yes	No	No	-
269	Mcal_269	G232G8W04I43IR_leg	272	Yes	I	F:GO:0005524; F:GO:0004674; P:GO:0016310	IPR018934 (PFAM); PTHR10593 (PANTHER); PTHR10593:SF22 (PANTHER)	Yes	Yes	Yes	-
270	Mcal_270	G232G8W04I43PP_leg	291	Yes	I	-	-	Yes	No	No	-
271	Mcal_271	G232G8W04I45UX_leg	116	Yes	I	-	-	No	No	No	-
272	Mcal_272	G232G8W04I46NB_leg	446	Yes	I	F:GO:0046872; F:GO:0008270	-	Yes	Yes	No	-
273	Mcal_273	G232G8W04I48MX_leg	156	Yes	I	-	-	Yes	No	No	-
274	Mcal_274	G232G8W04I4A2V_leg	315	Yes	I	C:GO:0005856; P:GO:0030833	SignalP-noTM (SIGNALP_EUK)	Yes	No	No	-
275	Mcal_275	G232G8W04I4B3Q_leg	119	Yes	I	-	-	No	No	No	-
276	Mcal_276	G232G8W04I4BV4_leg	122	Yes	I	-	-	No	No	No	-
277	Mcal_277	G232G8W04I4EF1_leg	328	Yes	I	F:GO:0005515	IPR015943 (G3DSA:2.130.10.GENE3D); IPR001680 (PFAM); PTHR15574 (PANTHER); PTHR15574:SF31 (PANTHER); IPR017986 (PROSITE_PROFILES); IPR001680 (PROSITE_PROFILES); IPR017986 (SUPERFAMILY)	Yes	Yes	Yes	-
278	Mcal_278	G232G8W04I4G4Y_leg	289	Yes	I	-	-	No	No	No	-
279	Mcal_279	G232G8W04I4GDC_leg	321	Yes	I	-	IPR001251 (G3DSA:3.40.525.GENE3D); IPR001251 (SUPERFAMILY)	Yes	No	No	-
280	Mcal_280	G232G8W04I4HM9_leg	449	Yes	I	P:GO:0031167; F:GO:0000179	IPR020598 (SMART); IPR029063 (G3DSA:3.40.50.GENE3D); IPR001737 (PFAM); IPR001737 (PANTHER); IPR029063 (SUPERFAMILY)	Yes	No	Yes	-
281	Mcal_281	G232G8W04I4KYQ_leg	291	Yes	I	-	-	No	No	No	-
282	Mcal_282	G232G8W04I4LFJ_leg	344	Yes	I	-	-	No	No	No	-
283	Mcal_283	G232G8W04I4LSW_leg	270	Yes	I	-	-	No	No	No	-
284	Mcal_284	G232G8W04I4NBQ_leg	319	Yes	I	-	-	Yes	No	No	-
285	Mcal_285	G232G8W04I4QOJ_leg	168	Yes	I	-	-	No	No	No	-
286	Mcal_286	G232G8W04I4R09_leg	121	Yes	I	-	-	No	No	No	-
287	Mcal_287	G232G8W04I4X1A_leg	420	Yes	I	-	-	Yes	No	No	-
288	Mcal_288	G232G8W04I4YLY_leg	292	Yes	I	-	-	No	No	No	-
289	Mcal_289	G232G8W04I4ZJ0_leg	188	Yes	I	-	-	No	No	No	-
290	Mcal_290	G232G8W04I514X_leg	340	Yes	I	-	-	Yes	Yes	Yes	-
291	Mcal_291	G232G8W04I52HW_leg	177	Yes	I	-	-	No	No	No	-
292	Mcal_292	G232G8W04I55MD_leg	311	Yes	I	-	SIGNAL_PEPTIDE_N_REGION (PHOBIUS); SIGNAL_PEPTIDE_C_REGION (PHOBIUS); SIGNAL_PEPTIDE (PHOBIUS); SIGNAL_PEPTIDE_H_REGION (PHOBIUS); NON_CYTOPLASMIC_DOMAIN (PHOBIUS); SignalP-noTM (SIGNALP_EUK)	No	No	No	-
293	Mcal_293	G232G8W04I56UK_leg	477	Yes	I	C:GO:0005743; F:GO:0005507; C:GO:0070469; C:GO:0016021; P:GO:0022900; F:GO:0004129	-	Yes	No	No	map00190
294	Mcal_294	G232G8W04I582G_leg	272	Yes	I	-	CYTOPLASMIC_DOMAIN (PHOBIUS); TRANSMEMBRANE (PHOBIUS); NON_CYTOPLASMIC_DOMAIN (PHOBIUS)	No	No	No	-
295	Mcal_295	G232G8W04I59ZS_leg	117	Yes	I	-	IPR029058 (G3DSA:3.40.50.GENE3D); IPR010497 (PFAM)	Yes	No	No	-
296	Mcal_296	G232G8W04I5C7J_leg	115	Yes	I	-	-	No	No	No	-
297	Mcal_297	G232G8W04I5E2G_leg	350	Yes	I	-	-	Yes	No	No	-
298	Mcal_298	G232G8W04I5I8X_leg	433	Yes	I	-	CYTOPLASMIC_DOMAIN (PHOBIUS); TRANSMEMBRANE (PHOBIUS); NON_CYTOPLASMIC_DOMAIN (PHOBIUS); TMhelix (TMHMM)	Yes	No	No	-
299	Mcal_299	G232G8W04I5O7F_leg	151	Yes	I	-	-	Yes	No	No	-
300	Mcal_300	G232G8W04I5OEC_leg	294	Yes	I	-	TMhelix (TMHMM)	No	No	No	-
301	Mcal_301	G232G8W04I5P1F_leg	417	Yes	I	-	IPR001846 (PFAM); IPR001846 (PROSITE_PROFILES)	Yes	No	No	-
302	Mcal_302	G232G8W04I5QFT_leg	371	Yes	I	-	-	No	No	No	-
303	Mcal_303	G232G8W04I61N8_leg	407	Yes	I	F:GO:0005509	IPR011992 (G3DSA:1.10.238.GENE3D); PTHR23048 (PANTHER); SSF47473 (SUPERFAMILY)	Yes	Yes	No	-
304	Mcal_304	G232G8W04I65AJ_leg	119	Yes	I	-	-	No	No	No	-
305	Mcal_305	G232G8W04I65K7_leg	385	Yes	I	-	-	Yes	No	No	-
306	Mcal_306	G232G8W04I6ACP_leg	433	Yes	I	F:GO:0005507; C:GO:0005615; F:GO:0031404; F:GO:0005344; F:GO:0016491; P:GO:0015671; P:GO:0055114	-	Yes	No	No	-
307	Mcal_307	G232G8W04I6CCU_leg	388	Yes	I	C:GO:0005576	IPR001283 (PRINTS); IPR002413 (PRINTS); IPR001283 (SMART); IPR014044 (PFAM); IPR014044 (G3DSA:3.40.33.GENE3D); PTHR10334:SF188 (PANTHER); IPR001283 (PANTHER); IPR018244 (PROSITE_PATTERNS); IPR014044 (SUPERFAMILY)	Yes	No	No	-
308	Mcal_308	G232G8W04I6FFX_leg	154	Yes	I	-	-	No	No	No	-
309	Mcal_309	G232G8W04I6IDN_leg	338	Yes	I	-	-	No	No	No	-
310	Mcal_310	G232G8W04I6O7R_leg	191	Yes	I	P:GO:0006508; F:GO:0008234	IPR000668 (PFAM); G3DSA:3.90.70.10 (GENE3D); PTHR12411:SF314 (PANTHER); IPR013128 (PANTHER); IPR025660 (PROSITE_PATTERNS); SSF54001 (SUPERFAMILY)	Yes	No	No	-
311	Mcal_311	G232G8W04I6USX_leg	198	Yes	I	-	-	No	No	No	-
312	Mcal_312	G232G8W04I6XKE_leg	240	Yes	I	-	IPR023175 (G3DSA:1.25.40.GENE3D); PF04652 (PFAM); PTHR12741 (PANTHER)	Yes	No	No	-
313	Mcal_313	G232G8W04I6Y9L_leg	247	Yes	I	-	-	No	No	No	-
314	Mcal_314	G232G8W04I72QL_leg	206	Yes	I	-	-	No	No	No	-
315	Mcal_315	G232G8W04I77LU_leg	252	Yes	I	-	-	No	No	No	-
316	Mcal_316	G232G8W04I7C7T_leg	393	Yes	I	-	-	No	No	No	-
317	Mcal_317	G232G8W04I7F5R_leg	257	Yes	I	-	-	No	No	No	-
318	Mcal_318	G232G8W04I7JCI_leg	266	Yes	I	-	-	No	No	No	-
319	Mcal_319	G232G8W04I7KIS_leg	248	Yes	I	F:GO:0016740	Coil (COILS); IPR000648 (PFAM); IPR000648 (PANTHER); PTHR10972:SF82 (PANTHER); SSF144000 (SUPERFAMILY)	Yes	No	No	-
320	Mcal_320	G232G8W04I7LIN_leg	293	Yes	I	-	-	No	No	No	-
321	Mcal_321	G232G8W04I7M4Q_leg	159	Yes	I	-	-	No	No	No	-
322	Mcal_322	G232G8W04I7P9Z_leg	164	Yes	I	-	-	No	No	No	-
323	Mcal_323	G232G8W04I7QF1_leg	233	Yes	I	-	-	No	No	No	-
324	Mcal_324	G232G8W04I7SZL_leg	402	Yes	I	F:GO:0047372; C:GO:0032281; P:GO:0007628; P:GO:0010996; P:GO:0006660	IPR029058 (G3DSA:3.40.50.GENE3D); PTHR12277 (PANTHER); PTHR12277:SF50 (PANTHER); IPR029058 (SUPERFAMILY)	Yes	Yes	No	map00561
325	Mcal_325	G232G8W04I7UWQ_leg	330	Yes	I	-	-	No	No	No	-
326	Mcal_326	G232G8W04I7XCK_leg	223	Yes	I	F:GO:0046872; F:GO:0008233	IPR000859 (PFAM); IPR000859 (G3DSA:2.60.120.GENE3D); PTHR10127 (PANTHER); IPR000859 (PROSITE_PROFILES); IPR000859 (SUPERFAMILY)	Yes	No	No	-
327	Mcal_327	G232G8W04I84NJ_leg	324	Yes	I	-	G3DSA:2.60.120.620 (GENE3D); IPR008775 (PFAM); PTHR21308 (PANTHER); PTHR21308:SF1 (PANTHER); SSF51197 (SUPERFAMILY)	Yes	No	No	-
328	Mcal_328	G232G8W04I84ZB_leg	367	Yes	I	-	-	No	No	No	-
329	Mcal_329	G232G8W04I8AHB_leg	346	Yes	I	-	-	No	No	No	-
330	Mcal_330	G232G8W04I8DDW_leg	188	Yes	I	-	-	No	No	No	-
331	Mcal_331	G232G8W04I8J9R_leg	253	Yes	I	-	NON_CYTOPLASMIC_DOMAIN (PHOBIUS); CYTOPLASMIC_DOMAIN (PHOBIUS); TRANSMEMBRANE (PHOBIUS); TMhelix (TMHMM)	No	No	No	-
332	Mcal_332	G232G8W04I8JNC_leg	401	Yes	I	F:GO:0008270	-	Yes	No	No	-
333	Mcal_333	G232G8W04I8M6B_leg	331	Yes	I	-	-	No	No	No	-
334	Mcal_334	G232G8W04I8TC5_leg	216	Yes	I	-	-	No	No	No	-
335	Mcal_335	G232G8W04I8THY_leg	445	Yes	I	-	-	Yes	No	No	-
336	Mcal_336	G232G8W04I92OY_leg	326	Yes	I	-	NON_CYTOPLASMIC_DOMAIN (PHOBIUS); SIGNAL_PEPTIDE_N_REGION (PHOBIUS); SIGNAL_PEPTIDE_C_REGION (PHOBIUS); SIGNAL_PEPTIDE (PHOBIUS); TRANSMEMBRANE (PHOBIUS); SIGNAL_PEPTIDE_H_REGION (PHOBIUS); CYTOPLASMIC_DOMAIN (PHOBIUS); SignalP-TM (SIGNALP_EUK); TMhelix (TMHMM); TMhelix (TMHMM)	No	No	No	-
337	Mcal_337	G232G8W04I94NF_leg	179	Yes	I	-	-	No	No	No	-
338	Mcal_338	G232G8W04I96FI_leg	330	Yes	I	-	SIGNAL_PEPTIDE_N_REGION (PHOBIUS); SIGNAL_PEPTIDE_C_REGION (PHOBIUS); NON_CYTOPLASMIC_DOMAIN (PHOBIUS); SIGNAL_PEPTIDE (PHOBIUS); SIGNAL_PEPTIDE_H_REGION (PHOBIUS); SignalP-noTM (SIGNALP_EUK)	No	No	No	-
339	Mcal_339	G232G8W04I9BNB_leg	443	Yes	I	-	CYTOPLASMIC_DOMAIN (PHOBIUS); NON_CYTOPLASMIC_DOMAIN (PHOBIUS); TRANSMEMBRANE (PHOBIUS); TMhelix (TMHMM)	Yes	No	No	-
340	Mcal_340	G232G8W04I9E9D_leg	368	Yes	I	-	-	No	No	No	-
341	Mcal_341	G232G8W04I9HT8_leg	401	Yes	I	C:GO:0005737; P:GO:0016310; F:GO:0005524; F:GO:0004054	IPR022414 (PFAM); IPR014746 (G3DSA:3.30.590.GENE3D); PTHR11547 (PANTHER); PTHR11547:SF18 (PANTHER); IPR022414 (PROSITE_PROFILES); SignalP-TM (SIGNALP_GRAM_POSITIVE); SSF55931 (SUPERFAMILY)	Yes	No	No	map00330
342	Mcal_342	G232G8W04I9KTF_leg	235	Yes	I	-	-	No	No	No	-
343	Mcal_343	G232G8W04I9TFB_leg	249	Yes	I	-	-	Yes	No	No	-
344	Mcal_344	G232G8W04I9WX2_leg	248	Yes	I	-	-	No	No	No	-
345	Mcal_345	G232G8W04IA22C_leg	193	Yes	I	-	-	No	No	No	-
346	Mcal_346	G232G8W04IA898_leg	385	Yes	I	-	NON_CYTOPLASMIC_DOMAIN (PHOBIUS); TRANSMEMBRANE (PHOBIUS); CYTOPLASMIC_DOMAIN (PHOBIUS); TMhelix (TMHMM)	Yes	No	No	-
347	Mcal_347	G232G8W04IA8PX_leg	363	Yes	I	-	-	Yes	No	No	-
348	Mcal_348	G232G8W04IAG2Y_leg	275	Yes	I	-	-	No	No	No	-
349	Mcal_349	G232G8W04IAKIZ_leg	182	Yes	I	-	NON_CYTOPLASMIC_DOMAIN (PHOBIUS); TRANSMEMBRANE (PHOBIUS); CYTOPLASMIC_DOMAIN (PHOBIUS); TMhelix (TMHMM)	No	No	No	-
350	Mcal_350	G232G8W04IANKK_leg	181	Yes	I	-	-	No	No	No	-
351	Mcal_351	G232G8W04IAQ27_leg	143	Yes	I	-	-	Yes	No	No	-
352	Mcal_352	G232G8W04IAWOB_leg	502	Yes	I	-	NON_CYTOPLASMIC_DOMAIN (PHOBIUS); SIGNAL_PEPTIDE_C_REGION (PHOBIUS); CYTOPLASMIC_DOMAIN (PHOBIUS); CYTOPLASMIC_DOMAIN (PHOBIUS); SIGNAL_PEPTIDE_N_REGION (PHOBIUS); TRANSMEMBRANE (PHOBIUS); SIGNAL_PEPTIDE (PHOBIUS); TRANSMEMBRANE (PHOBIUS); TRANSMEMBRANE (PHOBIUS); NON_CYTOPLASMIC_DOMAIN (PHOBIUS); SIGNAL_PEPTIDE_H_REGION (PHOBIUS); SignalP-TM (SIGNALP_GRAM_POSITIVE)	No	No	No	-
353	Mcal_353	G232G8W04IAWT5_leg	111	Yes	I	-	-	No	No	No	-
354	Mcal_354	G232G8W04IAY1L_leg	250	Yes	I	-	TMhelix (TMHMM)	No	No	No	-
355	Mcal_355	G232G8W04IAYAT_leg	171	Yes	I	-	TRANSMEMBRANE (PHOBIUS); CYTOPLASMIC_DOMAIN (PHOBIUS); NON_CYTOPLASMIC_DOMAIN (PHOBIUS); TMhelix (TMHMM)	No	No	No	-
356	Mcal_356	G232G8W04IB2RY_leg	354	Yes	I	-	-	No	No	No	-
357	Mcal_357	G232G8W04IB4E4_leg	301	Yes	I	P:GO:0035158; P:GO:0042059; P:GO:0042221; P:GO:0008360; F:GO:0005515; C:GO:0031594; P:GO:0016319; C:GO:0036062; P:GO:0008038; P:GO:0035159; C:GO:0042734; P:GO:0007612; C:GO:0005737; C:GO:0045211; P:GO:0048667; P:GO:0072553; P:GO:0048803; P:GO:0007156; C:GO:0014069; P:GO:0001746; C:GO:0042995; P:GO:0008582; C:GO:0005886	IPR013783 (G3DSA:2.60.40.GENE3D); IPR003961 (PFAM); IPR003961 (SUPERFAMILY)	Yes	No	No	-
358	Mcal_358	G232G8W04IB8PY_leg	425	Yes	I	-	-	Yes	No	No	-
359	Mcal_359	G232G8W04IBAYN_leg	232	Yes	I	F:GO:0004029; C:GO:0005739; P:GO:0055114	PTHR11699 (PANTHER); PTHR11699:SF151 (PANTHER)	Yes	No	Yes	map00330 map00625 map00620 map00380 map00280 map00903 map00410 map00310 map00010 map00071 map00561 map00053 map00340 map00040
360	Mcal_360	G232G8W04IBCTE_leg	391	Yes	I	-	TRANSMEMBRANE (PHOBIUS); CYTOPLASMIC_DOMAIN (PHOBIUS); NON_CYTOPLASMIC_DOMAIN (PHOBIUS); TMhelix (TMHMM)	No	No	No	-
361	Mcal_361	G232G8W04IBXV7_leg	463	Yes	I	-	-	No	No	No	-
362	Mcal_362	G232G8W04IBZDW_leg	253	Yes	I	-	-	No	No	No	-
363	Mcal_363	G232G8W04IC3V5_leg	356	Yes	I	F:GO:0003824	IPR000639 (PRINTS); IPR000073 (PFAM); IPR029058 (G3DSA:3.40.50.GENE3D); PTHR21661:SF10 (PANTHER); PTHR21661 (PANTHER); IPR029058 (SUPERFAMILY)	Yes	No	No	-
364	Mcal_364	G232G8W04IC4IF_leg	123	Yes	I	-	-	No	No	No	-
365	Mcal_365	G232G8W04IC575_leg	374	Yes	I	-	-	Yes	No	No	-
366	Mcal_366	G232G8W04IC6KJ_leg	150	Yes	I	-	-	No	No	No	-
367	Mcal_367	G232G8W04IC8E7_leg	290	Yes	I	-	-	Yes	No	No	-
368	Mcal_368	G232G8W04IC96T_leg	357	Yes	I	-	SIGNAL_PEPTIDE_C_REGION (PHOBIUS); NON_CYTOPLASMIC_DOMAIN (PHOBIUS); SIGNAL_PEPTIDE_N_REGION (PHOBIUS); SIGNAL_PEPTIDE (PHOBIUS); SIGNAL_PEPTIDE_H_REGION (PHOBIUS); SignalP-noTM (SIGNALP_EUK)	No	No	No	-
369	Mcal_369	G232G8W04ICAZ7_leg	179	Yes	I	F:GO:0005515	IPR001680 (PFAM); IPR015943 (G3DSA:2.130.10.GENE3D); PTHR22844 (PANTHER); PTHR22844:SF166 (PANTHER); IPR017986 (PROSITE_PROFILES); IPR017986 (SUPERFAMILY)	Yes	Yes	Yes	-
370	Mcal_370	G232G8W04ICBSD_leg	179	Yes	I	-	-	No	No	No	-
371	Mcal_371	G232G8W04ICCAP_leg	314	Yes	I	-	-	No	No	No	-
372	Mcal_372	G232G8W04ICERP_leg	393	Yes	I	F:GO:0003676; F:GO:0005524; F:GO:0008026	IPR014001 (SMART); IPR011545 (PFAM); IPR027417 (G3DSA:3.40.50.GENE3D); PTHR24031 (PANTHER); PTHR24031:SF219 (PANTHER); IPR000629 (PROSITE_PATTERNS); IPR014001 (PROSITE_PROFILES); IPR027417 (SUPERFAMILY)	Yes	Yes	Yes	-
373	Mcal_373	G232G8W04ICKKY_leg	153	Yes	I	-	-	No	No	No	-
374	Mcal_374	G232G8W04ICKNG_leg	342	Yes	I	-	-	No	No	No	-
375	Mcal_375	G232G8W04ICNIQ_leg	379	Yes	I	-	SignalP-TM (SIGNALP_EUK)	No	No	No	-
376	Mcal_376	G232G8W04ICQ4H_leg	222	Yes	I	C:GO:0005840; F:GO:0003735; P:GO:0006414	-	Yes	No	Yes	-
377	Mcal_377	G232G8W04ICUZK_leg	306	Yes	I	F:GO:0003676; F:GO:0000166	-	Yes	No	No	-
378	Mcal_378	G232G8W04ID2C5_leg	138	Yes	I	-	CYTOPLASMIC_DOMAIN (PHOBIUS); TRANSMEMBRANE (PHOBIUS); NON_CYTOPLASMIC_DOMAIN (PHOBIUS)	No	No	No	-
379	Mcal_379	G232G8W04ID4PF_leg	357	Yes	I	F:GO:0004683; P:GO:0006468; F:GO:0005524	G3DSA:1.10.510.10 (GENE3D); IPR000719 (PFAM); PTHR24349 (PANTHER); IPR000719 (PROSITE_PROFILES); IPR011009 (SUPERFAMILY)	Yes	Yes	No	-
380	Mcal_380	G232G8W04IDHCC_leg	305	Yes	I	-	-	No	No	No	-
381	Mcal_381	G232G8W04IDJ8M_leg	130	Yes	I	-	TRANSMEMBRANE (PHOBIUS); CYTOPLASMIC_DOMAIN (PHOBIUS); NON_CYTOPLASMIC_DOMAIN (PHOBIUS); TMhelix (TMHMM)	No	No	No	-
382	Mcal_382	G232G8W04IDMH3_leg	322	Yes	I	-	-	Yes	No	No	-
383	Mcal_383	G232G8W04IDPDV_leg	356	Yes	I	-	-	Yes	No	No	-
384	Mcal_384	G232G8W04IDUX7_leg	364	Yes	I	F:GO:0005391; C:GO:0016021; F:GO:0046872; P:GO:0015672; P:GO:0006754; F:GO:0005524	PR00121 (PRINTS); IPR004014 (SMART); IPR008250 (G3DSA:2.70.150.GENE3D); IPR004014 (PFAM); PTHR24093 (PANTHER); PTHR24093:SF222 (PANTHER); CYTOPLASMIC_DOMAIN (PHOBIUS); NON_CYTOPLASMIC_DOMAIN (PHOBIUS); TRANSMEMBRANE (PHOBIUS); SSF81665 (SUPERFAMILY); TMhelix (TMHMM)	Yes	No	No	-
385	Mcal_385	G232G8W04IE90G_leg	425	Yes	I	-	IPR009886 (PFAM); PTHR16231 (PANTHER); PTHR16231:SF0 (PANTHER)	Yes	No	No	-
386	Mcal_386	G232G8W04IEBIC_leg	362	Yes	I	-	-	No	No	No	-
387	Mcal_387	G232G8W04IEBV4_leg	233	Yes	I	-	-	No	No	No	-
388	Mcal_388	G232G8W04IEEVL_leg	237	Yes	I	P:GO:0006810; C:GO:0005622; F:GO:0005215	IPR001251 (PFAM); IPR001251 (G3DSA:3.40.525.GENE3D); PTHR10174 (PANTHER); PTHR10174:SF110 (PANTHER); IPR001251 (SUPERFAMILY)	Yes	No	No	-
389	Mcal_389	G232G8W04IEON7_leg	386	Yes	I	-	-	Yes	No	No	-
390	Mcal_390	G232G8W04IEPB0_leg	203	Yes	I	F:GO:0004721	IPR029052 (G3DSA:3.60.21.GENE3D)	Yes	Yes	Yes	map04660
391	Mcal_391	G232G8W04IEPC6_leg	381	Yes	I	F:GO:0003676; P:GO:0006508; F:GO:0008270; F:GO:0004197	IPR001096 (PFAM); PTHR12000:SF1 (PANTHER); IPR001096 (PANTHER)	Yes	No	Yes	-
392	Mcal_392	G232G8W04IEPK2_leg	320	Yes	I	F:GO:0046872; F:GO:0004222; P:GO:0006508	-	Yes	Yes	Yes	-
393	Mcal_393	G232G8W04IEQ5F_leg	222	Yes	I	-	-	No	No	No	-
394	Mcal_394	G232G8W04IEST4_leg	381	Yes	I	-	-	No	No	No	-
395	Mcal_395	G232G8W04IEWMV_leg	323	Yes	I	-	-	No	No	No	-
396	Mcal_396	G232G8W04IEZSO_leg	154	Yes	I	-	-	No	No	No	-
397	Mcal_397	G232G8W04IF1Q0_leg	305	Yes	I	-	CYTOPLASMIC_DOMAIN (PHOBIUS); TRANSMEMBRANE (PHOBIUS); NON_CYTOPLASMIC_DOMAIN (PHOBIUS); TMhelix (TMHMM)	No	No	No	-
398	Mcal_398	G232G8W04IF27M_leg	368	Yes	I	-	-	Yes	No	No	-
399	Mcal_399	G232G8W04IF58R_leg	238	Yes	I	-	-	No	No	No	-
400	Mcal_400	G232G8W04IF6L1_leg	224	Yes	I	-	-	No	No	No	-
401	Mcal_401	G232G8W04IF79S_leg	219	Yes	I	-	-	No	No	No	-
402	Mcal_402	G232G8W04IF7UO_leg	169	Yes	I	-	-	No	No	No	-
403	Mcal_403	G232G8W04IFBKA_leg	363	Yes	I	-	CYTOPLASMIC_DOMAIN (PHOBIUS); TRANSMEMBRANE (PHOBIUS); NON_CYTOPLASMIC_DOMAIN (PHOBIUS); TMhelix (TMHMM)	No	No	No	-
404	Mcal_404	G232G8W04IFDIL_leg	182	Yes	I	-	-	No	No	No	-
405	Mcal_405	G232G8W04IFEWQ_leg	287	Yes	I	-	CYTOPLASMIC_DOMAIN (PHOBIUS); TRANSMEMBRANE (PHOBIUS); NON_CYTOPLASMIC_DOMAIN (PHOBIUS); TMhelix (TMHMM)	No	No	No	-
406	Mcal_406	G232G8W04IFH3T_leg	283	Yes	I	F:GO:0003676	IPR000467 (SMART); IPR000467 (PFAM); PTHR23149:SF8 (PANTHER); PTHR23149 (PANTHER); IPR000467 (PROSITE_PROFILES)	Yes	Yes	No	-
407	Mcal_407	G232G8W04IFK2X_leg	298	Yes	I	-	-	No	No	No	-
408	Mcal_408	G232G8W04IFL67_leg	383	Yes	I	-	-	No	No	No	-
409	Mcal_409	G232G8W04IFM98_leg	311	Yes	I	-	-	Yes	No	No	-
410	Mcal_410	G232G8W04IFMIJ_leg	341	Yes	I	-	-	No	No	No	-
411	Mcal_411	G232G8W04IFOZ0_leg	317	Yes	I	F:GO:0003824; P:GO:0008152	IPR001310 (PRINTS); PF11969 (PFAM); IPR011146 (G3DSA:3.30.428.GENE3D); PTHR23089:SF4 (PANTHER); IPR001310 (PANTHER); IPR011146 (PROSITE_PROFILES); IPR011146 (SUPERFAMILY)	Yes	Yes	Yes	-
412	Mcal_412	G232G8W04IFPGZ_leg	150	Yes	I	-	-	No	No	No	-
413	Mcal_413	G232G8W04IFPTL_leg	383	Yes	I	C:GO:0005737	Coil (COILS); PTHR16294:SF1 (PANTHER); IPR007531 (PANTHER)	Yes	No	No	-
414	Mcal_414	G232G8W04IFQSV_leg	362	Yes	I	P:GO:0032312; F:GO:0008060; F:GO:0008270	IPR001164 (PRINTS); IPR001164 (SMART); IPR001164 (PFAM); PTHR23180 (PANTHER); PTHR23180:SF220 (PANTHER); IPR001164 (PROSITE_PROFILES); SSF57863 (SUPERFAMILY)	Yes	Yes	No	-
415	Mcal_415	G232G8W04IFSIR_leg	370	Yes	I	-	-	No	No	No	-
416	Mcal_416	G232G8W04IFWKK_leg	139	Yes	I	-	CYTOPLASMIC_DOMAIN (PHOBIUS); NON_CYTOPLASMIC_DOMAIN (PHOBIUS); TRANSMEMBRANE (PHOBIUS); TMhelix (TMHMM)	No	No	No	-
417	Mcal_417	G232G8W04IG1QL_leg	124	Yes	I	-	CYTOPLASMIC_DOMAIN (PHOBIUS); NON_CYTOPLASMIC_DOMAIN (PHOBIUS); TRANSMEMBRANE (PHOBIUS); TMhelix (TMHMM)	No	No	No	-
418	Mcal_418	G232G8W04IG3SG_leg	236	Yes	I	F:GO:0016491; P:GO:0008152	-	Yes	Yes	No	-
419	Mcal_419	G232G8W04IG68K_leg	281	Yes	I	-	-	No	No	No	-
420	Mcal_420	G232G8W04IGI1G_leg	477	Yes	I	-	-	No	No	No	-
421	Mcal_421	G232G8W04IGMLH_leg	240	Yes	I	-	-	No	No	No	-
422	Mcal_422	G232G8W04IGO2G_leg	121	Yes	I	-	NON_CYTOPLASMIC_DOMAIN (PHOBIUS); TRANSMEMBRANE (PHOBIUS); CYTOPLASMIC_DOMAIN (PHOBIUS); TMhelix (TMHMM)	No	No	No	-
423	Mcal_423	G232G8W04IGOVG_leg	324	Yes	I	-	TRANSMEMBRANE (PHOBIUS); CYTOPLASMIC_DOMAIN (PHOBIUS); NON_CYTOPLASMIC_DOMAIN (PHOBIUS); TMhelix (TMHMM)	Yes	No	No	-
424	Mcal_424	G232G8W04IGP9R_leg	371	Yes	I	C:GO:0016021	IPR002076 (PFAM); IPR002076 (PANTHER); NON_CYTOPLASMIC_DOMAIN (PHOBIUS); TRANSMEMBRANE (PHOBIUS); CYTOPLASMIC_DOMAIN (PHOBIUS); NON_CYTOPLASMIC_DOMAIN (PHOBIUS); TRANSMEMBRANE (PHOBIUS); TMhelix (TMHMM); TMhelix (TMHMM)	No	No	No	-
425	Mcal_425	G232G8W04IGT29_leg	131	Yes	I	-	IPR024055 (G3DSA:3.30.70.GENE3D)	Yes	No	Yes	-
426	Mcal_426	G232G8W04IGWM5_leg	217	Yes	I	-	-	No	No	No	-
427	Mcal_427	G232G8W04IGXLP_leg	430	Yes	I	C:GO:0005874; P:GO:0051258; P:GO:0006184; P:GO:0007017; F:GO:0003924; F:GO:0005200; F:GO:0005525	IPR002452 (PRINTS); IPR018316 (SMART); IPR018316 (PFAM); IPR018316 (G3DSA:3.30.1330.GENE3D); IPR000217 (PANTHER); IPR008280 (SUPERFAMILY)	Yes	Yes	No	-
428	Mcal_428	G232G8W04IGZDN_leg	286	Yes	I	-	-	No	No	No	-
429	Mcal_429	G232G8W04IH08B_leg	387	Yes	I	F:GO:0046872	IPR000571 (G3DSA:4.10.1000.GENE3D); IPR000571 (PROSITE_PROFILES); IPR000571 (PROSITE_PROFILES)	Yes	No	No	-
430	Mcal_430	G232G8W04IH3DG_leg	278	Yes	I	P:GO:0007411; P:GO:0034332; C:GO:0031941; P:GO:0045214; C:GO:0005829; P:GO:0061024; C:GO:0030016; P:GO:0034329; F:GO:0042802; C:GO:0070062; P:GO:0038096; P:GO:0045087; F:GO:0005524; F:GO:0005200	-	Yes	Yes	Yes	-
431	Mcal_431	G232G8W04IH5JI_leg	313	Yes	I	-	-	Yes	No	No	-
432	Mcal_432	G232G8W04IH6YJ_leg	269	Yes	I	-	-	Yes	No	No	-
433	Mcal_433	G232G8W04IHB0X_leg	396	Yes	I	P:GO:0055085; F:GO:0022857; C:GO:0016021	IPR005828 (PFAM); PTHR24064:SF202 (PANTHER); PTHR24064 (PANTHER); NON_CYTOPLASMIC_DOMAIN (PHOBIUS); TRANSMEMBRANE (PHOBIUS); CYTOPLASMIC_DOMAIN (PHOBIUS); IPR016196 (SUPERFAMILY); TMhelix (TMHMM)	Yes	No	No	-
434	Mcal_434	G232G8W04IHDMS_leg	435	Yes	I	P:GO:0006413; F:GO:0008026; F:GO:0005524; F:GO:0003743	IPR027417 (G3DSA:3.40.50.GENE3D); PTHR24031:SF57 (PANTHER); PTHR24031 (PANTHER); IPR027417 (SUPERFAMILY)	Yes	Yes	Yes	-
435	Mcal_435	G232G8W04IHEYH_leg	320	Yes	I	F:GO:0005509	IPR011992 (G3DSA:1.10.238.GENE3D); PTHR10891:SF539 (PANTHER); PTHR10891 (PANTHER); IPR002048 (PROSITE_PROFILES); SSF47473 (SUPERFAMILY)	Yes	Yes	No	-
436	Mcal_436	G232G8W04IHF6S_leg	309	Yes	I	-	TRANSMEMBRANE (PHOBIUS); CYTOPLASMIC_DOMAIN (PHOBIUS); NON_CYTOPLASMIC_DOMAIN (PHOBIUS)	No	No	No	-
437	Mcal_437	G232G8W04IHGDW_leg	368	Yes	I	F:GO:0003779; C:GO:0016459; F:GO:0005524; F:GO:0003774; F:GO:0032440; P:GO:0055114	NON_CYTOPLASMIC_DOMAIN (PHOBIUS); SIGNAL_PEPTIDE_C_REGION (PHOBIUS); TRANSMEMBRANE (PHOBIUS); SIGNAL_PEPTIDE_N_REGION (PHOBIUS); SIGNAL_PEPTIDE (PHOBIUS); TRANSMEMBRANE (PHOBIUS); CYTOPLASMIC_DOMAIN (PHOBIUS); SIGNAL_PEPTIDE_H_REGION (PHOBIUS); NON_CYTOPLASMIC_DOMAIN (PHOBIUS); SignalP-noTM (SIGNALP_EUK)	Yes	No	No	-
438	Mcal_438	G232G8W04IHNBP_leg	339	Yes	I	-	-	No	No	No	-
439	Mcal_439	G232G8W04IHQGH_leg	355	Yes	I	C:GO:0005737; P:GO:0006457; F:GO:0005524; F:GO:0051082	IPR002423 (PFAM); IPR027413 (G3DSA:1.10.560.GENE3D); IPR002423 (PANTHER); IPR002423 (SUPERFAMILY)	Yes	Yes	Yes	-
440	Mcal_440	G232G8W04IHTG4_leg	327	Yes	I	F:GO:0008168; P:GO:0008152; P:GO:0032259	-	Yes	No	No	-
441	Mcal_441	G232G8W04IHUME_leg	441	Yes	I	-	TRANSMEMBRANE (PHOBIUS); NON_CYTOPLASMIC_DOMAIN (PHOBIUS); CYTOPLASMIC_DOMAIN (PHOBIUS); TMhelix (TMHMM)	Yes	No	No	-
442	Mcal_442	G232G8W04IHWMM_leg	254	Yes	I	-	SIGNAL_PEPTIDE_C_REGION (PHOBIUS); SIGNAL_PEPTIDE_N_REGION (PHOBIUS); NON_CYTOPLASMIC_DOMAIN (PHOBIUS); SIGNAL_PEPTIDE_H_REGION (PHOBIUS); SIGNAL_PEPTIDE (PHOBIUS); SignalP-noTM (SIGNALP_EUK); SignalP-noTM (SIGNALP_GRAM_NEGATIVE); SignalP-TM (SIGNALP_GRAM_POSITIVE)	No	No	No	-
443	Mcal_443	G232G8W04IHWVR_leg	174	Yes	I	P:GO:0006139; F:GO:0003676; F:GO:0004527; F:GO:0004534; F:GO:0008270; C:GO:0005634; C:GO:0005622	-	Yes	No	Yes	-
444	Mcal_444	G232G8W04IHXI3_leg	447	Yes	I	-	-	No	No	No	-
445	Mcal_445	G232G8W04II3HW_leg	210	Yes	I	-	CYTOPLASMIC_DOMAIN (PHOBIUS); NON_CYTOPLASMIC_DOMAIN (PHOBIUS); TRANSMEMBRANE (PHOBIUS); TMhelix (TMHMM)	No	No	No	-
446	Mcal_446	G232G8W04II48E_leg	350	Yes	I	F:GO:0004386; F:GO:0003676; F:GO:0005524; F:GO:0016787; F:GO:0000166; F:GO:0008026	-	Yes	Yes	Yes	-
447	Mcal_447	G232G8W04II49Y_leg	222	Yes	I	-	-	No	No	No	-
448	Mcal_448	G232G8W04II802_leg	365	Yes	I	-	TRANSMEMBRANE (PHOBIUS); CYTOPLASMIC_DOMAIN (PHOBIUS); NON_CYTOPLASMIC_DOMAIN (PHOBIUS); NON_CYTOPLASMIC_DOMAIN (PHOBIUS); TRANSMEMBRANE (PHOBIUS); TRANSMEMBRANE (PHOBIUS); CYTOPLASMIC_DOMAIN (PHOBIUS)	No	No	No	-
449	Mcal_449	G232G8W04II8LJ_leg	176	Yes	I	-	-	Yes	No	No	-
450	Mcal_450	G232G8W04IIA1Y_leg	334	Yes	I	-	-	Yes	No	No	-
451	Mcal_451	G232G8W04IIDUC_leg	247	Yes	I	-	TRANSMEMBRANE (PHOBIUS); NON_CYTOPLASMIC_DOMAIN (PHOBIUS); CYTOPLASMIC_DOMAIN (PHOBIUS); TMhelix (TMHMM)	No	No	No	-
452	Mcal_452	G232G8W04IIF67_leg	338	Yes	I	-	-	Yes	No	No	-
453	Mcal_453	G232G8W04IILPN_leg	291	Yes	I	-	TRANSMEMBRANE (PHOBIUS); CYTOPLASMIC_DOMAIN (PHOBIUS); NON_CYTOPLASMIC_DOMAIN (PHOBIUS); TMhelix (TMHMM)	No	No	No	-
454	Mcal_454	G232G8W04IIQEZ_leg	417	Yes	I	-	-	No	No	No	-
455	Mcal_455	G232G8W04IISUT_leg	316	Yes	I	-	-	Yes	No	No	-
456	Mcal_456	G232G8W04IITA8_leg	284	Yes	I	-	CYTOPLASMIC_DOMAIN (PHOBIUS); TRANSMEMBRANE (PHOBIUS); NON_CYTOPLASMIC_DOMAIN (PHOBIUS); TMhelix (TMHMM)	No	No	No	-
457	Mcal_457	G232G8W04IITUQ_leg	489	Yes	I	F:GO:0005515	IPR003599 (SMART); IPR003598 (SMART); IPR013783 (G3DSA:2.60.40.GENE3D); IPR013098 (PFAM); PTHR19897:SF149 (PANTHER); PTHR19897 (PANTHER); IPR007110 (PROSITE_PROFILES); SSF48726 (SUPERFAMILY)	Yes	No	No	-
458	Mcal_458	G232G8W04IIVAG_leg	365	Yes	I	F:GO:0003707; C:GO:0005634; F:GO:0003700	IPR008946 (G3DSA:1.10.565.GENE3D); IPR008946 (SUPERFAMILY)	Yes	No	No	-
459	Mcal_459	G232G8W04IJ70M_leg	377	Yes	I	P:GO:0010038	G3DSA:3.30.70.830 (GENE3D); IPR004323 (PFAM); IPR004323 (PANTHER); PTHR23419:SF1 (PANTHER); IPR011322 (SUPERFAMILY)	Yes	Yes	No	-
460	Mcal_460	G232G8W04IJ7GG_leg	471	Yes	I	-	-	No	No	No	-
461	Mcal_461	G232G8W04IJB47_leg	421	Yes	I	-	SignalP-noTM (SIGNALP_EUK)	Yes	No	No	-
462	Mcal_462	G232G8W04IJCCA_leg	390	Yes	I	P:GO:0055114; F:GO:0016491	IPR002347 (PRINTS); IPR002198 (PRINTS); IPR016040 (G3DSA:3.40.50.GENE3D); IPR002198 (PFAM); PTHR24316 (PANTHER); PTHR24316:SF251 (PANTHER); IPR020904 (PROSITE_PATTERNS); SSF51735 (SUPERFAMILY)	Yes	Yes	No	-
463	Mcal_463	G232G8W04IJCG8_leg	473	Yes	I	-	-	Yes	No	No	-
464	Mcal_464	G232G8W04IJDVJ_leg	190	Yes	I	-	-	Yes	No	No	-
465	Mcal_465	G232G8W04IJFD4_leg	491	Yes	I	F:GO:0080019	IPR013120 (PFAM); IPR016040 (G3DSA:3.40.50.GENE3D); IPR026055 (PANTHER); PTHR11011:SF26 (PANTHER); SSF51735 (SUPERFAMILY)	Yes	No	No	-
466	Mcal_466	G232G8W04IJFGR_leg	501	Yes	I	-	-	Yes	No	No	-
467	Mcal_467	G232G8W04IJIH5_leg	374	Yes	I	-	-	No	No	No	-
468	Mcal_468	G232G8W04IJISL_leg	424	Yes	I	-	CYTOPLASMIC_DOMAIN (PHOBIUS); TRANSMEMBRANE (PHOBIUS); NON_CYTOPLASMIC_DOMAIN (PHOBIUS); TMhelix (TMHMM)	Yes	No	No	-
469	Mcal_469	G232G8W04IJKAY_leg	387	Yes	I	-	Coil (COILS)	No	No	No	-
470	Mcal_470	G232G8W04IJMD5_leg	440	Yes	I	F:GO:0005509	IPR011992 (G3DSA:1.10.238.GENE3D); PTHR23048:SF6 (PANTHER); PTHR23048 (PANTHER); IPR002048 (PROSITE_PROFILES); SSF47473 (SUPERFAMILY)	Yes	Yes	No	-
471	Mcal_471	G232G8W04IJQGP_leg	208	Yes	I	-	-	Yes	No	No	-
472	Mcal_472	G232G8W04IJUB6_leg	300	Yes	I	-	NON_CYTOPLASMIC_DOMAIN (PHOBIUS); SIGNAL_PEPTIDE_N_REGION (PHOBIUS); SIGNAL_PEPTIDE (PHOBIUS); SIGNAL_PEPTIDE_C_REGION (PHOBIUS); SIGNAL_PEPTIDE_H_REGION (PHOBIUS)	No	No	No	-
473	Mcal_473	G232G8W04IJUIM_leg	361	Yes	I	F:GO:0043565; F:GO:0003700; P:GO:0006355	PTHR11829 (PANTHER); PTHR11829:SF118 (PANTHER)	Yes	No	No	-
474	Mcal_474	G232G8W04IJW20_leg	371	Yes	I	-	-	No	No	No	-
475	Mcal_475	G232G8W04IJX5Q_leg	134	Yes	I	-	-	No	No	No	-
476	Mcal_476	G232G8W04IJZ8Q_leg	272	Yes	I	C:GO:0016021; C:GO:0016020; C:GO:0005794; C:GO:0000139; P:GO:0015031; P:GO:0006810	-	Yes	No	No	-
477	Mcal_477	G232G8W04IK0KB_leg	499	Yes	I	-	SignalP-noTM (SIGNALP_EUK)	No	No	No	-
478	Mcal_478	G232G8W04IK2PZ_leg	284	Yes	I	-	-	No	No	No	-
479	Mcal_479	G232G8W04IK6NE_leg	234	Yes	I	-	-	No	No	No	-
480	Mcal_480	G232G8W04IKBCF_leg	382	Yes	I	C:GO:0005576; P:GO:0006030; F:GO:0008061	-	Yes	No	No	-
481	Mcal_481	G232G8W04IKD8S_leg	367	Yes	I	-	-	Yes	No	No	-
482	Mcal_482	G232G8W04IKELU_leg	268	Yes	I	-	IPR007330 (G3DSA:1.20.58.GENE3D); PTHR14964:SF2 (PANTHER); PTHR14964 (PANTHER); SSF140361 (SUPERFAMILY)	Yes	No	No	-
483	Mcal_483	G232G8W04IKFUS_leg	334	Yes	I	-	IPR011989 (G3DSA:1.25.10.GENE3D)	Yes	No	No	-
484	Mcal_484	G232G8W04IKJET_leg	378	Yes	I	-	SignalP-noTM (SIGNALP_EUK)	Yes	No	No	-
485	Mcal_485	G232G8W04IKJUF_leg	435	Yes	I	F:GO:0017134	IPR008614 (PFAM); PTHR13223:SF2 (PANTHER); IPR008614 (PANTHER)	Yes	No	No	-
486	Mcal_486	G232G8W04IKQEV_leg	133	Yes	I	-	-	Yes	No	No	-
487	Mcal_487	G232G8W04IKQZ4_leg	106	Yes	I	-	SIGNAL_PEPTIDE_N_REGION (PHOBIUS); SIGNAL_PEPTIDE (PHOBIUS); SIGNAL_PEPTIDE_C_REGION (PHOBIUS); NON_CYTOPLASMIC_DOMAIN (PHOBIUS); SIGNAL_PEPTIDE_H_REGION (PHOBIUS); TMhelix (TMHMM)	No	No	No	-
488	Mcal_488	G232G8W04IKRR9_leg	277	Yes	I	-	-	No	No	No	-
489	Mcal_489	G232G8W04IKS2C_leg	431	Yes	I	F:GO:0051287; P:GO:0055114; F:GO:0048038; F:GO:0003954	IPR001135 (PFAM); IPR029014 (G3DSA:1.10.645.GENE3D); PTHR11993 (PANTHER); PTHR11993:SF24 (PANTHER); IPR029014 (SUPERFAMILY)	Yes	No	No	map00190
490	Mcal_490	G232G8W04IKWH9_leg	185	Yes	I	-	-	Yes	No	No	-
491	Mcal_491	G232G8W04IKX4G_leg	255	Yes	I	-	-	Yes	No	No	-
492	Mcal_492	G232G8W04IKXNC_leg	198	Yes	I	-	-	No	No	No	-
493	Mcal_493	G232G8W04IKZX2_leg	340	Yes	I	P:GO:0055114; F:GO:0004471	IPR012301 (G3DSA:3.40.50.GENE3D); PTHR23406:SF10 (PANTHER); PTHR23406 (PANTHER); SSF53223 (SUPERFAMILY)	Yes	No	No	map00620 map00710
494	Mcal_494	G232G8W04IL0FO_leg	265	Yes	I	-	TMhelix (TMHMM)	No	No	No	-
495	Mcal_495	G232G8W04IL0SR_leg	278	Yes	I	-	-	No	No	No	-
496	Mcal_496	G232G8W04IL1U6_leg	155	Yes	I	-	-	No	No	No	-
497	Mcal_497	G232G8W04IL1ZN_leg	164	Yes	I	F:GO:0005506; P:GO:0006633; C:GO:0016021; C:GO:0016020; P:GO:0006629; P:GO:0055114; F:GO:0016491; F:GO:0004768; F:GO:0016717; C:GO:0005783	-	Yes	No	No	map01040
498	Mcal_498	G232G8W04IL7K3_leg	353	Yes	I	-	-	Yes	No	No	-
499	Mcal_499	G232G8W04IL9AU_leg	388	Yes	I	F:GO:0051287; F:GO:0004450; F:GO:0000287; P:GO:0006099; P:GO:0006102	IPR024084 (G3DSA:3.40.718.GENE3D); IPR004790 (PANTHER); SSF53659 (SUPERFAMILY)	Yes	No	Yes	map00720 map00480 map00020
500	Mcal_500	G232G8W04ILANJ_leg	124	Yes	I	-	-	No	No	No	-
501	Mcal_501	G232G8W04ILHMH_leg	101	Yes	I	-	-	No	No	No	-
502	Mcal_502	G232G8W04ILHNH_leg	207	Yes	I	F:GO:0003779; C:GO:0016459; F:GO:0005524; F:GO:0003774; F:GO:0032440; P:GO:0055114	Coil (COILS); IPR002928 (PFAM); PTHR13140:SF332 (PANTHER); PTHR13140 (PANTHER)	Yes	No	No	-
503	Mcal_503	G232G8W04ILHYS_leg	345	Yes	I	F:GO:0003677; P:GO:0045292; P:GO:0051028; F:GO:0000339; C:GO:0005846	-	Yes	No	No	-
504	Mcal_504	G232G8W04ILO5W_leg	402	Yes	I	F:GO:0004386; F:GO:0003676; F:GO:0005524	IPR027417 (G3DSA:3.40.50.GENE3D); IPR001650 (PFAM); PTHR24031 (PANTHER); PTHR24031:SF68 (PANTHER); IPR001650 (PROSITE_PROFILES); IPR027417 (SUPERFAMILY)	Yes	Yes	Yes	-
505	Mcal_505	G232G8W04ILR2H_leg	262	Yes	I	-	-	No	No	No	-
506	Mcal_506	G232G8W04ILWNX_leg	318	Yes	I	-	-	Yes	No	Yes	-
507	Mcal_507	G232G8W04ILXSL_leg	268	Yes	I	-	-	No	No	No	-
508	Mcal_508	G232G8W04ILZFZ_leg	414	Yes	I	-	-	No	No	No	-
509	Mcal_509	G232G8W04ILZOM_leg	394	Yes	I	-	CYTOPLASMIC_DOMAIN (PHOBIUS); NON_CYTOPLASMIC_DOMAIN (PHOBIUS); TRANSMEMBRANE (PHOBIUS)	Yes	No	No	-
510	Mcal_510	G232G8W04IM054_leg	359	Yes	I	-	CYTOPLASMIC_DOMAIN (PHOBIUS); TRANSMEMBRANE (PHOBIUS); NON_CYTOPLASMIC_DOMAIN (PHOBIUS)	No	No	No	-
511	Mcal_511	G232G8W04IM7UX_leg	282	Yes	I	-	-	No	No	No	-
512	Mcal_512	G232G8W04IM83S_leg	264	Yes	I	-	-	No	No	No	-
513	Mcal_513	G232G8W04IMAAV_leg	411	Yes	I	-	SIGNAL_PEPTIDE_N_REGION (PHOBIUS); SIGNAL_PEPTIDE (PHOBIUS); SIGNAL_PEPTIDE_C_REGION (PHOBIUS); SIGNAL_PEPTIDE_H_REGION (PHOBIUS); NON_CYTOPLASMIC_DOMAIN (PHOBIUS); SignalP-noTM (SIGNALP_GRAM_NEGATIVE); SignalP-noTM (SIGNALP_EUK)	Yes	No	No	-
514	Mcal_514	G232G8W04IMBYE_leg	382	Yes	I	-	SIGNAL_PEPTIDE_N_REGION (PHOBIUS); SIGNAL_PEPTIDE_C_REGION (PHOBIUS); NON_CYTOPLASMIC_DOMAIN (PHOBIUS); SIGNAL_PEPTIDE (PHOBIUS); SIGNAL_PEPTIDE_H_REGION (PHOBIUS); SignalP-noTM (SIGNALP_EUK)	No	No	No	-
515	Mcal_515	G232G8W04IMCMF_leg	519	Yes	I	-	SIGNAL_PEPTIDE_H_REGION (PHOBIUS); SIGNAL_PEPTIDE_N_REGION (PHOBIUS); SIGNAL_PEPTIDE_C_REGION (PHOBIUS); SIGNAL_PEPTIDE (PHOBIUS); NON_CYTOPLASMIC_DOMAIN (PHOBIUS); SignalP-noTM (SIGNALP_EUK); TMhelix (TMHMM)	No	No	No	-
516	Mcal_516	G232G8W04IMEGM_leg	156	Yes	I	-	-	No	No	No	-
517	Mcal_517	G232G8W04IMFHS_leg	197	Yes	I	-	-	No	No	No	-
518	Mcal_518	G232G8W04IMHZI_leg	384	Yes	I	F:GO:0004252; P:GO:0006508	IPR001254 (PFAM); G3DSA:2.40.10.10 (GENE3D); PTHR24255 (PANTHER); IPR018114 (PROSITE_PATTERNS); IPR001254 (PROSITE_PROFILES); IPR009003 (SUPERFAMILY)	Yes	No	No	-
519	Mcal_519	G232G8W04IMLIO_leg	173	Yes	I	-	-	No	No	No	-
520	Mcal_520	G232G8W04IMUR7_leg	127	Yes	I	-	NON_CYTOPLASMIC_DOMAIN (PHOBIUS); CYTOPLASMIC_DOMAIN (PHOBIUS); TRANSMEMBRANE (PHOBIUS); TMhelix (TMHMM)	No	No	No	-
521	Mcal_521	G232G8W04IMWBB_leg	320	Yes	I	-	-	No	No	No	-
522	Mcal_522	G232G8W04IMWIA_leg	386	Yes	I	-	-	Yes	No	No	-
523	Mcal_523	G232G8W04IN0QJ_leg	279	Yes	I	F:GO:0020037; F:GO:0004601; P:GO:0055114; P:GO:0006979	IPR002007 (G3DSA:1.10.640.GENE3D); IPR002007 (PFAM); PTHR11475 (PANTHER); PTHR11475:SF4 (PANTHER); IPR002007 (PROSITE_PROFILES); IPR010255 (SUPERFAMILY)	Yes	No	No	map00360 map00940
524	Mcal_524	G232G8W04IN4YA_leg	371	Yes	I	C:GO:0005737; P:GO:0006457; F:GO:0005524; F:GO:0051082	IPR017998 (PRINTS); IPR002423 (PFAM); IPR027413 (G3DSA:1.10.560.GENE3D); IPR002423 (PANTHER); IPR002194 (PROSITE_PATTERNS); IPR002194 (PROSITE_PATTERNS); IPR002423 (SUPERFAMILY)	Yes	Yes	Yes	-
525	Mcal_525	G232G8W04IN7M1_leg	195	Yes	I	P:GO:0007050; F:GO:0005509; F:GO:0003779	-	Yes	No	No	-
526	Mcal_526	G232G8W04IN7OL_leg	431	Yes	I	-	SIGNAL_PEPTIDE_H_REGION (PHOBIUS); SIGNAL_PEPTIDE (PHOBIUS); SIGNAL_PEPTIDE_N_REGION (PHOBIUS); SIGNAL_PEPTIDE_C_REGION (PHOBIUS); NON_CYTOPLASMIC_DOMAIN (PHOBIUS)	Yes	No	No	-
527	Mcal_527	G232G8W04IN95Q_leg	338	Yes	I	-	-	No	No	No	-
528	Mcal_528	G232G8W04INCZP_leg	111	Yes	I	F:GO:0004553; P:GO:0005975	IPR000322 (PFAM); SSF51011 (SUPERFAMILY)	Yes	No	No	-
529	Mcal_529	G232G8W04ING5N_leg	282	Yes	I	-	CYTOPLASMIC_DOMAIN (PHOBIUS); CYTOPLASMIC_DOMAIN (PHOBIUS); TRANSMEMBRANE (PHOBIUS); NON_CYTOPLASMIC_DOMAIN (PHOBIUS); TRANSMEMBRANE (PHOBIUS); SignalP-noTM (SIGNALP_EUK)	No	No	No	-
530	Mcal_530	G232G8W04INHI0_leg	345	Yes	I	P:GO:0016310; F:GO:0004674; F:GO:0000166; F:GO:0005515	IPR003598 (SMART); IPR003599 (SMART); IPR013783 (G3DSA:2.60.40.GENE3D); IPR013098 (PFAM); PTHR19897 (PANTHER); IPR007110 (PROSITE_PROFILES); SSF48726 (SUPERFAMILY)	Yes	Yes	No	-
531	Mcal_531	G232G8W04INKGP_leg	235	Yes	I	-	-	No	No	No	-
532	Mcal_532	G232G8W04INQKT_leg	303	Yes	I	-	-	Yes	No	No	-
533	Mcal_533	G232G8W04INSKI_leg	360	Yes	I	-	-	No	No	No	-
534	Mcal_534	G232G8W04INVHF_leg	211	Yes	I	-	-	Yes	No	No	-
535	Mcal_535	G232G8W04INVK7_leg	120	Yes	I	-	TRANSMEMBRANE (PHOBIUS); NON_CYTOPLASMIC_DOMAIN (PHOBIUS); CYTOPLASMIC_DOMAIN (PHOBIUS); TMhelix (TMHMM)	No	No	No	-
536	Mcal_536	G232G8W04INXWZ_leg	146	Yes	I	-	-	Yes	No	No	-
537	Mcal_537	G232G8W04IO0A0_leg	375	Yes	I	-	-	No	No	No	-
538	Mcal_538	G232G8W04IO5CW_leg	435	Yes	I	-	TRANSMEMBRANE (PHOBIUS); CYTOPLASMIC_DOMAIN (PHOBIUS); NON_CYTOPLASMIC_DOMAIN (PHOBIUS); TMhelix (TMHMM)	No	No	No	-
539	Mcal_539	G232G8W04IO6YO_leg	359	Yes	I	-	-	No	No	No	-
540	Mcal_540	G232G8W04IO78R_leg	375	Yes	I	-	-	No	No	No	-
541	Mcal_541	G232G8W04IO7UO_leg	291	Yes	I	F:GO:0043168; F:GO:0016772	-	Yes	Yes	No	-
542	Mcal_542	G232G8W04IO8N4_leg	136	Yes	I	-	-	No	No	No	-
543	Mcal_543	G232G8W04IOBPY_leg	110	Yes	I	-	-	No	No	No	-
544	Mcal_544	G232G8W04IOD40_leg	365	Yes	I	C:GO:0005737; P:GO:0016310; F:GO:0005524; F:GO:0004054	IPR014746 (G3DSA:3.30.590.GENE3D); IPR022414 (PFAM); PTHR11547 (PANTHER); PTHR11547:SF18 (PANTHER); IPR022414 (PROSITE_PROFILES); SSF55931 (SUPERFAMILY)	Yes	No	No	map00330
545	Mcal_545	G232G8W04IOEF5_leg	245	Yes	I	-	SIGNAL_PEPTIDE_N_REGION (PHOBIUS); SIGNAL_PEPTIDE_C_REGION (PHOBIUS); SIGNAL_PEPTIDE (PHOBIUS); NON_CYTOPLASMIC_DOMAIN (PHOBIUS); SIGNAL_PEPTIDE_H_REGION (PHOBIUS); TMhelix (TMHMM)	No	No	No	-
546	Mcal_546	G232G8W04IOFF1_leg	197	Yes	I	-	-	No	No	No	-
547	Mcal_547	G232G8W04IOGDC_leg	244	Yes	I	-	IPR015096 (PFAM)	Yes	No	No	-
548	Mcal_548	G232G8W04IOI96_leg	232	Yes	I	F:GO:0046982	IPR009072 (G3DSA:1.10.20.GENE3D)	Yes	No	No	-
549	Mcal_549	G232G8W04IOIJ1_leg	397	Yes	I	F:GO:0003676; C:GO:0030529; F:GO:0000166	IPR000504 (SMART); IPR012677 (G3DSA:3.30.70.GENE3D); IPR000504 (PFAM); PTHR24012 (PANTHER); PTHR24012:SF259 (PANTHER); IPR000504 (PROSITE_PROFILES); SSF54928 (SUPERFAMILY)	Yes	Yes	Yes	-
550	Mcal_550	G232G8W04IONE5_leg	104	Yes	I	-	IPR003008 (G3DSA:3.40.50.GENE3D)	Yes	No	No	-
551	Mcal_551	G232G8W04IOO34_leg	403	Yes	I	-	-	No	No	No	-
552	Mcal_552	G232G8W04IOUZA_leg	169	Yes	I	-	-	No	No	No	-
553	Mcal_553	G232G8W04IOX10_leg	371	Yes	I	-	TRANSMEMBRANE (PHOBIUS); NON_CYTOPLASMIC_DOMAIN (PHOBIUS); TRANSMEMBRANE (PHOBIUS); CYTOPLASMIC_DOMAIN (PHOBIUS); NON_CYTOPLASMIC_DOMAIN (PHOBIUS); TMhelix (TMHMM); TMhelix (TMHMM)	No	No	No	-
554	Mcal_554	G232G8W04IP35G_leg	406	Yes	I	P:GO:0006886; C:GO:0017119	IPR019335 (PFAM)	Yes	No	No	-
555	Mcal_555	G232G8W04IP9HM_leg	448	Yes	I	-	-	No	No	No	-
556	Mcal_556	G232G8W04IPBUQ_leg	186	Yes	I	-	-	No	No	No	-
557	Mcal_557	G232G8W04IPC51_leg	252	Yes	I	-	TMhelix (TMHMM)	No	No	No	-
558	Mcal_558	G232G8W04IPG56_leg	424	Yes	I	F:GO:0003700; F:GO:0043565; C:GO:0005634; P:GO:0006355	IPR002112 (PRINTS); IPR004827 (PFAM); IPR008917 (G3DSA:1.10.880.GENE3D); PTHR11462 (PANTHER); PTHR11462:SF37 (PANTHER); IPR008917 (SUPERFAMILY)	Yes	No	No	-
559	Mcal_559	G232G8W04IPMK7_leg	339	Yes	I	C:GO:0005856; C:GO:0005737; F:GO:0005524	-	Yes	Yes	Yes	-
560	Mcal_560	G232G8W04IPRDV_leg	193	Yes	I	-	-	No	No	No	-
561	Mcal_561	G232G8W04IPS8U_leg	456	Yes	I	-	NON_CYTOPLASMIC_DOMAIN (PHOBIUS); SIGNAL_PEPTIDE_N_REGION (PHOBIUS); SIGNAL_PEPTIDE_C_REGION (PHOBIUS); SIGNAL_PEPTIDE (PHOBIUS); SIGNAL_PEPTIDE_H_REGION (PHOBIUS); SignalP-noTM (SIGNALP_EUK); SignalP-TM (SIGNALP_GRAM_POSITIVE); SignalP-noTM (SIGNALP_GRAM_NEGATIVE)	Yes	No	No	-
562	Mcal_562	G232G8W04IPUB5_leg	471	Yes	I	F:GO:0005515	IPR000980 (G3DSA:3.30.505.GENE3D); IPR000980 (SUPERFAMILY)	Yes	No	No	-
563	Mcal_563	G232G8W04IPWYL_leg	231	Yes	I	-	-	No	No	No	-
564	Mcal_564	G232G8W04IQ1C6_leg	356	Yes	I	-	-	No	No	No	-
565	Mcal_565	G232G8W04IQ29C_leg	432	Yes	I	-	-	No	No	No	-
566	Mcal_566	G232G8W04IQ2RD_leg	184	Yes	I	-	IPR003033 (G3DSA:3.30.1050.GENE3D)	Yes	No	No	-
567	Mcal_567	G232G8W04IQ2RZ_leg	364	Yes	I	C:GO:0005737; C:GO:0005839; C:GO:0005634; F:GO:0004298; P:GO:0051603	SIGNAL_PEPTIDE_H_REGION (PHOBIUS); SIGNAL_PEPTIDE_C_REGION (PHOBIUS); SIGNAL_PEPTIDE_N_REGION (PHOBIUS); NON_CYTOPLASMIC_DOMAIN (PHOBIUS); SIGNAL_PEPTIDE (PHOBIUS)	Yes	No	Yes	-
568	Mcal_568	G232G8W04IQ4OQ_leg	355	Yes	I	C:GO:0044424	-	Yes	No	Yes	-
569	Mcal_569	G232G8W04IQ8P5_leg	404	Yes	I	-	-	No	No	No	-
570	Mcal_570	G232G8W04IQDTF_leg	389	Yes	I	-	TRANSMEMBRANE (PHOBIUS); CYTOPLASMIC_DOMAIN (PHOBIUS); NON_CYTOPLASMIC_DOMAIN (PHOBIUS); TMhelix (TMHMM)	Yes	No	No	-
571	Mcal_571	G232G8W04IQGXL_leg	290	Yes	I	-	TRANSMEMBRANE (PHOBIUS); CYTOPLASMIC_DOMAIN (PHOBIUS); NON_CYTOPLASMIC_DOMAIN (PHOBIUS); TMhelix (TMHMM)	Yes	No	No	-
572	Mcal_572	G232G8W04IQGZX_leg	122	Yes	I	-	-	No	No	No	-
573	Mcal_573	G232G8W04IQH0H_leg	334	Yes	I	-	-	No	No	No	-
574	Mcal_574	G232G8W04IQL4N_leg	134	Yes	I	-	-	No	No	No	-
575	Mcal_575	G232G8W04IQMPG_leg	431	Yes	I	-	-	Yes	No	No	-
576	Mcal_576	G232G8W04IQPBI_leg	388	Yes	I	-	-	No	No	No	-
577	Mcal_577	G232G8W04IQRGX_leg	295	Yes	I	F:GO:0046872; P:GO:0042744; F:GO:0020037; F:GO:0004096; P:GO:0055114	NON_CYTOPLASMIC_DOMAIN (PHOBIUS); SIGNAL_PEPTIDE_H_REGION (PHOBIUS); SIGNAL_PEPTIDE_C_REGION (PHOBIUS); SIGNAL_PEPTIDE_N_REGION (PHOBIUS); SIGNAL_PEPTIDE (PHOBIUS); SignalP-noTM (SIGNALP_EUK)	Yes	No	Yes	map00380 map00630
578	Mcal_578	G232G8W04IQRP6_leg	453	Yes	I	-	-	No	No	No	-
579	Mcal_579	G232G8W04IQS8P_leg	324	Yes	I	-	-	No	No	No	-
580	Mcal_580	G232G8W04IQTV4_leg	116	Yes	I	-	-	No	No	No	-
581	Mcal_581	G232G8W04IQU1R_leg	359	Yes	I	-	TRANSMEMBRANE (PHOBIUS); NON_CYTOPLASMIC_DOMAIN (PHOBIUS); CYTOPLASMIC_DOMAIN (PHOBIUS)	No	No	No	-
582	Mcal_582	G232G8W04IQUA2_leg	255	Yes	I	-	CYTOPLASMIC_DOMAIN (PHOBIUS); TRANSMEMBRANE (PHOBIUS); NON_CYTOPLASMIC_DOMAIN (PHOBIUS); TMhelix (TMHMM)	No	No	No	-
583	Mcal_583	G232G8W04IQX1O_leg	342	Yes	I	-	CYTOPLASMIC_DOMAIN (PHOBIUS); NON_CYTOPLASMIC_DOMAIN (PHOBIUS); TRANSMEMBRANE (PHOBIUS); TMhelix (TMHMM)	No	No	No	-
584	Mcal_584	G232G8W04IR07K_leg	123	Yes	I	-	-	No	No	No	-
585	Mcal_585	G232G8W04IR2SR_leg	359	Yes	I	C:GO:0019898; C:GO:0005737; F:GO:0003779	Coil (COILS); IPR000798 (PRINTS); IPR011259 (PFAM); PTHR23281 (PANTHER); PTHR23281:SF18 (PANTHER); IPR008954 (SUPERFAMILY)	Yes	No	No	-
586	Mcal_586	G232G8W04IR3SK_leg	437	Yes	I	F:GO:0005507; C:GO:0005615; F:GO:0031404; F:GO:0005344; F:GO:0016491; P:GO:0015671; P:GO:0055114	IPR005203 (G3DSA:2.60.40.GENE3D); IPR000896 (PFAM); IPR008922 (G3DSA:1.10.1280.GENE3D); IPR005203 (PFAM); IPR013788 (PANTHER); PTHR11511:SF24 (PANTHER); IPR002227 (PROSITE_PATTERNS); IPR013788 (PROSITE_PATTERNS); IPR008922 (SUPERFAMILY); IPR014756 (SUPERFAMILY)	Yes	No	No	-
587	Mcal_587	G232G8W04IR5X2_leg	283	Yes	I	-	CYTOPLASMIC_DOMAIN (PHOBIUS); NON_CYTOPLASMIC_DOMAIN (PHOBIUS); TRANSMEMBRANE (PHOBIUS); TMhelix (TMHMM)	Yes	No	No	-
588	Mcal_588	G232G8W04IR7LY_leg	119	Yes	I	-	-	No	No	No	-
589	Mcal_589	G232G8W04IR8GW_leg	187	Yes	I	F:GO:0003676; F:GO:0005524; F:GO:0008026	IPR027417 (G3DSA:3.40.50.GENE3D); IPR001650 (PFAM); PTHR24031 (PANTHER); PTHR24031:SF182 (PANTHER); IPR027417 (SUPERFAMILY)	Yes	Yes	Yes	-
590	Mcal_590	G232G8W04IRB8F_leg	224	Yes	I	-	-	No	No	No	-
591	Mcal_591	G232G8W04IRCKI_leg	363	Yes	I	C:GO:0016021; P:GO:0006810	TRANSMEMBRANE (PHOBIUS); TRANSMEMBRANE (PHOBIUS); CYTOPLASMIC_DOMAIN (PHOBIUS); NON_CYTOPLASMIC_DOMAIN (PHOBIUS); CYTOPLASMIC_DOMAIN (PHOBIUS); TMhelix (TMHMM); TMhelix (TMHMM)	Yes	No	No	-
592	Mcal_592	G232G8W04IRDWJ_leg	239	Yes	I	-	-	No	No	No	-
593	Mcal_593	G232G8W04IREJJ_leg	262	Yes	I	-	-	No	No	No	-
594	Mcal_594	G232G8W04IRTHA_leg	117	Yes	I	-	-	No	No	No	-
595	Mcal_595	G232G8W04IRU5B_leg	409	Yes	I	P:GO:0006355; F:GO:0043565; F:GO:0003700	NON_CYTOPLASMIC_DOMAIN (PHOBIUS); TRANSMEMBRANE (PHOBIUS); CYTOPLASMIC_DOMAIN (PHOBIUS)	Yes	No	No	-
596	Mcal_596	G232G8W04IS0MH_leg	116	Yes	I	-	-	No	No	No	-
597	Mcal_597	G232G8W04IS4QO_leg	256	Yes	I	F:GO:0005525; C:GO:0005622; F:GO:0004767; C:GO:0016020; P:GO:0007264	CYTOPLASMIC_DOMAIN (PHOBIUS); TRANSMEMBRANE (PHOBIUS); NON_CYTOPLASMIC_DOMAIN (PHOBIUS)	Yes	Yes	Yes	map00600
598	Mcal_598	G232G8W04IS75U_leg	207	Yes	I	-	-	No	No	No	-
599	Mcal_599	G232G8W04IS7XO_leg	121	Yes	I	-	-	No	No	No	-
600	Mcal_600	G232G8W04IS8R6_leg	362	Yes	I	F:GO:0003676	-	Yes	Yes	No	-
601	Mcal_601	G232G8W04IS8TJ_leg	155	Yes	I	-	-	No	No	No	-
602	Mcal_602	G232G8W04IS8ZV_leg	484	Yes	I	F:GO:0004672; F:GO:0005524; P:GO:0006468	IPR002290 (SMART); G3DSA:3.30.200.20 (GENE3D); IPR000719 (PFAM); PTHR24056:SF171 (PANTHER); PTHR24056 (PANTHER); IPR017441 (PROSITE_PATTERNS); CYTOPLASMIC_DOMAIN (PHOBIUS); TRANSMEMBRANE (PHOBIUS); NON_CYTOPLASMIC_DOMAIN (PHOBIUS); IPR000719 (PROSITE_PROFILES); IPR011009 (SUPERFAMILY)	Yes	Yes	Yes	-
603	Mcal_603	G232G8W04ISF1T_leg	326	Yes	I	F:GO:0003779	NON_CYTOPLASMIC_DOMAIN (PHOBIUS); SIGNAL_PEPTIDE_H_REGION (PHOBIUS); SIGNAL_PEPTIDE_C_REGION (PHOBIUS); SIGNAL_PEPTIDE_N_REGION (PHOBIUS); SIGNAL_PEPTIDE (PHOBIUS); SignalP-noTM (SIGNALP_EUK)	Yes	No	No	-
604	Mcal_604	G232G8W04ISHM3_leg	246	Yes	I	-	-	No	No	No	-
605	Mcal_605	G232G8W04ISHU4_leg	309	Yes	I	P:GO:0006629; F:GO:0004435; P:GO:0035556	IPR017946 (G3DSA:3.20.20.GENE3D); IPR001711 (PROSITE_PROFILES); IPR017946 (SUPERFAMILY)	Yes	No	No	map00562 map04070
606	Mcal_606	G232G8W04ISI6L_leg	277	Yes	I	F:GO:0003676; F:GO:0000166	IPR012677 (G3DSA:3.30.70.GENE3D); IPR000504 (PFAM); IPR000504 (PROSITE_PROFILES); SSF54928 (SUPERFAMILY)	Yes	Yes	No	-
607	Mcal_607	G232G8W04ISK3K_leg	270	Yes	I	-	-	Yes	No	No	-
608	Mcal_608	G232G8W04ISKCF_leg	387	Yes	I	-	-	No	No	No	-
609	Mcal_609	G232G8W04ISLJB_leg	326	Yes	I	-	-	Yes	No	No	-
610	Mcal_610	G232G8W04ISNT0_leg	442	Yes	I	-	-	Yes	Yes	No	-
611	Mcal_611	G232G8W04ISQX7_leg	322	Yes	I	F:GO:0032440; P:GO:0055114; F:GO:0005509	-	Yes	No	No	-
612	Mcal_612	G232G8W04ISSXK_leg	348	Yes	I	-	-	Yes	No	No	-
613	Mcal_613	G232G8W04ISX39_leg	289	Yes	I	-	-	Yes	No	No	-
614	Mcal_614	G232G8W04IT07Y_leg	112	Yes	I	-	-	No	No	No	-
615	Mcal_615	G232G8W04IT1VS_leg	305	Yes	I	-	-	No	No	No	-
616	Mcal_616	G232G8W04IT3OJ_leg	510	Yes	I	F:GO:0005198; P:GO:0016226; F:GO:0051536	SIGNAL_PEPTIDE_N_REGION (PHOBIUS); SIGNAL_PEPTIDE_C_REGION (PHOBIUS); NON_CYTOPLASMIC_DOMAIN (PHOBIUS); SIGNAL_PEPTIDE (PHOBIUS); SIGNAL_PEPTIDE_H_REGION (PHOBIUS); SignalP-TM (SIGNALP_GRAM_POSITIVE)	Yes	No	No	-
617	Mcal_617	G232G8W04IT816_leg	253	Yes	I	-	TRANSMEMBRANE (PHOBIUS); NON_CYTOPLASMIC_DOMAIN (PHOBIUS); TRANSMEMBRANE (PHOBIUS); CYTOPLASMIC_DOMAIN (PHOBIUS); CYTOPLASMIC_DOMAIN (PHOBIUS); TMhelix (TMHMM); TMhelix (TMHMM)	No	No	No	-
618	Mcal_618	G232G8W04IT8VM_leg	328	Yes	I	-	-	No	No	No	-
619	Mcal_619	G232G8W04ITBVU_leg	261	Yes	I	-	-	Yes	No	No	-
620	Mcal_620	G232G8W04ITEBS_leg	246	Yes	I	-	-	No	No	No	-
621	Mcal_621	G232G8W04ITV3R_leg	171	Yes	I	-	-	No	No	No	-
622	Mcal_622	G232G8W04ITVF8_leg	395	Yes	I	-	-	No	No	No	-
623	Mcal_623	G232G8W04IU3KX_leg	406	Yes	I	-	-	No	No	No	-
624	Mcal_624	G232G8W04IU4K0_leg	112	Yes	I	-	-	No	No	No	-
625	Mcal_625	G232G8W04IU7ET_leg	250	Yes	I	P:GO:0006950	-	Yes	No	No	-
626	Mcal_626	G232G8W04IU87W_leg	351	Yes	I	-	CYTOPLASMIC_DOMAIN (PHOBIUS); NON_CYTOPLASMIC_DOMAIN (PHOBIUS); TRANSMEMBRANE (PHOBIUS)	Yes	No	No	-
627	Mcal_627	G232G8W04IUECS_leg	411	Yes	I	-	SIGNAL_PEPTIDE_H_REGION (PHOBIUS); NON_CYTOPLASMIC_DOMAIN (PHOBIUS); SIGNAL_PEPTIDE_N_REGION (PHOBIUS); SIGNAL_PEPTIDE_C_REGION (PHOBIUS); SIGNAL_PEPTIDE (PHOBIUS); TMhelix (TMHMM)	Yes	No	No	-
628	Mcal_628	G232G8W04IUGEV_leg	216	Yes	I	-	-	No	No	No	-
629	Mcal_629	G232G8W04IUIL8_leg	208	Yes	I	-	-	No	No	No	-
630	Mcal_630	G232G8W04IUKHS_leg	488	Yes	I	C:GO:0044424; P:GO:0044699; P:GO:0032502; F:GO:0005515	G3DSA:3.10.20.90 (GENE3D); IPR000626 (PFAM); IPR000938 (G3DSA:2.30.30.GENE3D); IPR000938 (SUPERFAMILY); IPR029071 (SUPERFAMILY)	Yes	No	No	-
631	Mcal_631	G232G8W04IUOB9_leg	284	Yes	I	F:GO:0003676	-	Yes	No	No	-
632	Mcal_632	G232G8W04IURNV_leg	375	Yes	I	-	-	No	No	No	-
633	Mcal_633	G232G8W04IUTS9_leg	394	Yes	I	F:GO:0003899; P:GO:0006351; F:GO:0003723	IPR005576 (G3DSA:3.30.1490.GENE3D); IPR003029 (PFAM); IPR005576 (PFAM); IPR012340 (G3DSA:2.40.50.GENE3D); PTHR12709 (PANTHER); PTHR12709:SF4 (PANTHER); IPR012340 (SUPERFAMILY); IPR005576 (SUPERFAMILY)	Yes	Yes	Yes	map00230 map00240
634	Mcal_634	G232G8W04IUTZ2_leg	286	Yes	I	P:GO:0055114; F:GO:0020037; P:GO:0006979; F:GO:0004601; P:GO:0040035	-	Yes	No	No	map00360 map00940
635	Mcal_635	G232G8W04IUV7V_leg	380	Yes	I	-	CYTOPLASMIC_DOMAIN (PHOBIUS); NON_CYTOPLASMIC_DOMAIN (PHOBIUS); TRANSMEMBRANE (PHOBIUS)	No	No	No	-
636	Mcal_636	G232G8W04IUZM4_leg	169	Yes	I	-	TMhelix (TMHMM)	No	No	No	-
637	Mcal_637	G232G8W04IV2OA_leg	155	Yes	I	-	-	No	No	No	-
638	Mcal_638	G232G8W04IV527_leg	383	Yes	I	F:GO:0003677; F:GO:0003700; P:GO:0006355; C:GO:0005634	IPR012890 (PANTHER)	Yes	No	No	-
639	Mcal_639	G232G8W04IV8E0_leg	194	Yes	I	-	-	No	No	No	-
640	Mcal_640	G232G8W04IV8P7_leg	150	Yes	I	-	-	No	No	No	-
641	Mcal_641	G232G8W04IVCQ9_leg	336	Yes	I	-	TMhelix (TMHMM)	No	No	No	-
642	Mcal_642	G232G8W04IVH18_leg	293	Yes	I	F:GO:0046872	-	Yes	No	Yes	-
643	Mcal_643	G232G8W04IVL75_leg	259	Yes	I	-	-	No	No	No	-
644	Mcal_644	G232G8W04IVPTU_leg	328	Yes	I	-	-	Yes	No	No	-
645	Mcal_645	G232G8W04IVQSZ_leg	462	Yes	I	P:GO:0055114; F:GO:0016491	IPR002198 (PFAM); IPR016040 (G3DSA:3.40.50.GENE3D); PTHR24322 (PANTHER); PTHR24322:SF237 (PANTHER); SSF51735 (SUPERFAMILY)	Yes	No	No	-
646	Mcal_646	G232G8W04IVVK4_leg	224	Yes	I	-	-	No	No	No	-
647	Mcal_647	G232G8W04IVWW2_leg	387	Yes	I	-	TRANSMEMBRANE (PHOBIUS); CYTOPLASMIC_DOMAIN (PHOBIUS); NON_CYTOPLASMIC_DOMAIN (PHOBIUS); TMhelix (TMHMM)	Yes	No	No	-
648	Mcal_648	G232G8W04IW1G6_leg	426	Yes	I	-	SIGNAL_PEPTIDE_N_REGION (PHOBIUS); SIGNAL_PEPTIDE_H_REGION (PHOBIUS); NON_CYTOPLASMIC_DOMAIN (PHOBIUS); SIGNAL_PEPTIDE_C_REGION (PHOBIUS); SIGNAL_PEPTIDE (PHOBIUS); SignalP-noTM (SIGNALP_GRAM_NEGATIVE); SignalP-noTM (SIGNALP_EUK)	Yes	No	No	-
649	Mcal_649	G232G8W04IW4L3_leg	358	Yes	I	-	-	No	No	No	-
650	Mcal_650	G232G8W04IW63W_leg	204	Yes	I	-	-	Yes	No	No	-
651	Mcal_651	G232G8W04IWCOK_leg	248	Yes	I	-	-	No	No	No	-
652	Mcal_652	G232G8W04IWCV5_leg	286	Yes	I	-	-	No	No	No	-
653	Mcal_653	G232G8W04IWFZY_leg	386	Yes	I	-	-	Yes	Yes	No	-
654	Mcal_654	G232G8W04IWIX4_leg	409	Yes	I	F:GO:0015439; P:GO:0006200; F:GO:0005524; F:GO:0015417	IPR027417 (G3DSA:3.40.50.GENE3D); PF12848 (PFAM); IPR003439 (PFAM); PTHR19211 (PANTHER); PTHR19211:SF15 (PANTHER); IPR027417 (SUPERFAMILY)	Yes	Yes	Yes	-
655	Mcal_655	G232G8W04IWLPH_leg	348	Yes	I	-	-	Yes	No	No	-
656	Mcal_656	G232G8W04IWRBQ_leg	264	Yes	I	-	-	Yes	No	No	-
657	Mcal_657	G232G8W04IWVTM_leg	348	Yes	I	F:GO:0004252; F:GO:0030246; P:GO:0007155; P:GO:0042381; C:GO:0005576; P:GO:0006508	-	Yes	No	No	-
658	Mcal_658	G232G8W04IWXFC_leg	218	Yes	I	-	-	No	No	No	-
659	Mcal_659	G232G8W04IWXTD_leg	317	Yes	I	-	SignalP-noTM (SIGNALP_EUK)	No	No	No	-
660	Mcal_660	G232G8W04IX1D2_leg	183	Yes	I	-	-	No	No	No	-
661	Mcal_661	G232G8W04IX2TW_leg	408	Yes	I	-	-	No	No	No	-
662	Mcal_662	G232G8W04IX2W7_leg	354	Yes	I	P:GO:0006952; P:GO:0016310; F:GO:0005515	IPR003892 (SMART); G3DSA:1.10.8.10 (GENE3D); IPR003892 (PFAM); PTHR16461:SF5 (PANTHER); PTHR16461 (PANTHER); IPR003892 (PROSITE_PROFILES); IPR009060 (SUPERFAMILY)	Yes	No	No	-
663	Mcal_663	G232G8W04IX6OO_leg	375	Yes	I	-	-	No	No	No	-
664	Mcal_664	G232G8W04IX7WA_leg	210	Yes	I	-	-	No	No	No	-
665	Mcal_665	G232G8W04IX95Y_leg	369	Yes	I	-	-	No	No	No	-
666	Mcal_666	G232G8W04IX9RM_leg	332	Yes	I	P:GO:0008152; F:GO:0008168	IPR013216 (PFAM); IPR029063 (G3DSA:3.40.50.GENE3D); IPR026113 (PANTHER); IPR029063 (SUPERFAMILY)	Yes	Yes	No	-
667	Mcal_667	G232G8W04IXEJF_leg	171	Yes	I	-	-	No	No	No	-
668	Mcal_668	G232G8W04IXG5H_leg	382	Yes	I	F:GO:0016491; P:GO:0055114	IPR016040 (G3DSA:3.40.50.GENE3D)	Yes	No	No	-
669	Mcal_669	G232G8W04IXIW6_leg	128	Yes	I	-	TRANSMEMBRANE (PHOBIUS); CYTOPLASMIC_DOMAIN (PHOBIUS); NON_CYTOPLASMIC_DOMAIN (PHOBIUS)	No	No	No	-
670	Mcal_670	G232G8W04IXL2L_leg	321	Yes	I	-	-	No	No	No	-
671	Mcal_671	G232G8W04IXMIF_leg	323	Yes	I	-	-	Yes	No	No	-
672	Mcal_672	G232G8W04IXMK3_leg	169	Yes	I	-	-	No	No	No	-
673	Mcal_673	G232G8W04IXN5X_leg	283	Yes	I	-	-	Yes	No	No	-
674	Mcal_674	G232G8W04IXP3O_leg	342	Yes	I	F:GO:0003676; F:GO:0046983	-	Yes	No	No	-
675	Mcal_675	G232G8W04IXUK7_leg	217	Yes	I	-	NON_CYTOPLASMIC_DOMAIN (PHOBIUS); CYTOPLASMIC_DOMAIN (PHOBIUS); TRANSMEMBRANE (PHOBIUS); TMhelix (TMHMM)	Yes	No	No	-
676	Mcal_676	G232G8W04IY5UJ_leg	309	Yes	I	-	-	Yes	No	No	-
677	Mcal_677	G232G8W04IY6JG_leg	233	Yes	I	C:GO:0005829; C:GO:0030863; P:GO:0051086; F:GO:0019894; F:GO:0030957; C:GO:0070062; C:GO:0035267; F:GO:0005524; F:GO:0050998; C:GO:0030529; C:GO:0070688	IPR004000 (PFAM); G3DSA:3.30.420.40 (GENE3D); PTHR11937:SF178 (PANTHER); IPR004000 (PANTHER); NON_CYTOPLASMIC_DOMAIN (PHOBIUS); SIGNAL_PEPTIDE_H_REGION (PHOBIUS); SIGNAL_PEPTIDE_N_REGION (PHOBIUS); SIGNAL_PEPTIDE (PHOBIUS); SIGNAL_PEPTIDE_C_REGION (PHOBIUS); SignalP-TM (SIGNALP_GRAM_POSITIVE); SignalP-noTM (SIGNALP_GRAM_NEGATIVE); SignalP-noTM (SIGNALP_EUK); SSF53067 (SUPERFAMILY)	Yes	Yes	Yes	-
678	Mcal_678	G232G8W04IYIGU_leg	466	Yes	I	F:GO:0031409; F:GO:0036094; C:GO:0005576	IPR012674 (G3DSA:2.40.128.GENE3D); IPR000566 (PFAM); IPR011038 (SUPERFAMILY)	Yes	No	No	-
679	Mcal_679	G232G8W04IYIW9_leg	391	Yes	I	C:GO:0032040	IPR007276 (PFAM); IPR007276 (PANTHER); PTHR23183:SF0 (PANTHER)	Yes	No	No	-
680	Mcal_680	G232G8W04IYMD9_leg	469	Yes	I	F:GO:0005507; C:GO:0005615; F:GO:0031404; F:GO:0005344; F:GO:0016491; P:GO:0015671; P:GO:0055114	IPR005203 (PFAM); IPR005203 (G3DSA:2.60.40.GENE3D); IPR013788 (PANTHER); PTHR11511:SF24 (PANTHER); IPR014756 (SUPERFAMILY)	Yes	No	No	-
681	Mcal_681	G232G8W04IYPRS_leg	309	Yes	I	-	-	No	No	No	-
682	Mcal_682	G232G8W04IYSYY_leg	179	Yes	I	-	-	Yes	No	No	-
683	Mcal_683	G232G8W04IYURH_leg	309	Yes	I	-	IPR019324 (PFAM); IPR019324 (PANTHER); CYTOPLASMIC_DOMAIN (PHOBIUS); TRANSMEMBRANE (PHOBIUS); NON_CYTOPLASMIC_DOMAIN (PHOBIUS); TMhelix (TMHMM)	Yes	No	No	-
684	Mcal_684	G232G8W04IYVNX_leg	315	Yes	I	-	-	No	No	No	-
685	Mcal_685	G232G8W04IYXXJ_leg	315	Yes	I	F:GO:0008536; P:GO:0006886; P:GO:0006810; C:GO:0005634	TRANSMEMBRANE (PHOBIUS); NON_CYTOPLASMIC_DOMAIN (PHOBIUS); CYTOPLASMIC_DOMAIN (PHOBIUS); TMhelix (TMHMM)	Yes	No	No	-
686	Mcal_686	G232G8W04IYZG3_leg	256	Yes	I	-	-	No	No	No	-
687	Mcal_687	G232G8W04IZ0T4_leg	419	Yes	I	-	SIGNAL_PEPTIDE_C_REGION (PHOBIUS); SIGNAL_PEPTIDE (PHOBIUS); NON_CYTOPLASMIC_DOMAIN (PHOBIUS); SIGNAL_PEPTIDE_H_REGION (PHOBIUS); SIGNAL_PEPTIDE_N_REGION (PHOBIUS); SignalP-noTM (SIGNALP_EUK); SignalP-TM (SIGNALP_GRAM_POSITIVE)	Yes	No	No	-
688	Mcal_688	G232G8W04IZ351_leg	474	Yes	I	-	Coil (COILS)	Yes	No	No	-
689	Mcal_689	G232G8W04IZ3PZ_leg	100	Yes	I	-	-	No	No	No	-
690	Mcal_690	G232G8W04IZ7Q6_leg	232	Yes	I	-	-	No	No	No	-
691	Mcal_691	G232G8W04IZ8HJ_leg	310	Yes	I	-	-	No	No	No	-
692	Mcal_692	G232G8W04IZ90H_leg	130	Yes	I	-	-	Yes	No	No	-
693	Mcal_693	G232G8W04IZ9QP_leg	350	Yes	I	-	-	No	No	No	-
694	Mcal_694	G232G8W04IZAE6_leg	275	Yes	I	-	-	Yes	No	No	-
695	Mcal_695	G232G8W04IZBVN_leg	307	Yes	I	-	-	No	No	No	-
696	Mcal_696	G232G8W04IZDPM_leg	243	Yes	I	-	-	No	No	No	-
697	Mcal_697	G232G8W04IZO3U_leg	200	Yes	I	-	-	No	No	No	-
698	Mcal_698	G232G8W04IZOMI_leg	115	Yes	I	-	-	No	No	No	-
699	Mcal_699	G232G8W04IZTKF_leg	377	Yes	I	-	-	No	No	No	-
700	Mcal_700	G232G8W04IZW0L_leg	215	Yes	I	-	-	Yes	No	No	-
701	Mcal_701	G232G8W04IZWK6_leg	168	Yes	I	-	-	No	No	No	-
702	Mcal_702	G232G8W04IZX8U_leg	380	Yes	I	F:GO:0032440; P:GO:0055114; F:GO:0005509	-	Yes	No	No	-
703	Mcal_703	G232G8W04IZYJ4_leg	363	Yes	I	-	CYTOPLASMIC_DOMAIN (PHOBIUS); NON_CYTOPLASMIC_DOMAIN (PHOBIUS); TRANSMEMBRANE (PHOBIUS); TMhelix (TMHMM)	Yes	No	No	-
704	Mcal_704	G232G8W04J0C6V_leg	318	Yes	I	P:GO:0043065; C:GO:0005856; F:GO:0005080; P:GO:0019048; F:GO:0032947; C:GO:0030496; P:GO:2001244; C:GO:0015935; F:GO:0030971; P:GO:0043547; P:GO:0051726; F:GO:0042169; P:GO:0032464; F:GO:0008656; P:GO:0030822; C:GO:0001891; P:GO:0017148; P:GO:0001934; P:GO:2000114; P:GO:0006919; P:GO:0051343; P:GO:0050765; C:GO:0043204; P:GO:0090003; P:GO:0030178; C:GO:0048471; P:GO:2000543; P:GO:0051302; P:GO:00…	IPR001680 (PFAM); IPR015943 (G3DSA:2.130.10.GENE3D); PTHR19868:SF0 (PANTHER); PTHR19868 (PANTHER); IPR001680 (PROSITE_PROFILES); IPR017986 (PROSITE_PROFILES); IPR017986 (SUPERFAMILY)	Yes	Yes	Yes	-
705	Mcal_705	G232G8W04J1AIV_leg	413	Yes	I	F:GO:0042625; F:GO:0000166	Coil (COILS); IPR027417 (G3DSA:3.40.50.GENE3D); PTHR19211 (PANTHER); PTHR19211:SF45 (PANTHER)	Yes	Yes	Yes	-
706	Mcal_706	G232G8W04J1PYN_leg	156	Yes	I	-	-	No	No	No	-
707	Mcal_707	G232G8W04JA2O1_leg	427	Yes	I	F:GO:0003676; C:GO:0030529; F:GO:0000166	-	Yes	No	No	-
708	Mcal_708	G232G8W04JA3C3_leg	267	Yes	I	-	-	Yes	No	No	-
709	Mcal_709	G232G8W04JA8KS_leg	155	Yes	I	-	-	Yes	No	No	-
710	Mcal_710	G232G8W04JABE5_leg	240	Yes	I	-	TRANSMEMBRANE (PHOBIUS); NON_CYTOPLASMIC_DOMAIN (PHOBIUS); CYTOPLASMIC_DOMAIN (PHOBIUS); TMhelix (TMHMM)	No	No	No	-
711	Mcal_711	G232G8W04JAI8P_leg	325	Yes	I	C:GO:0045111; C:GO:0016235; C:GO:0005791; F:GO:0008565; C:GO:0016021; P:GO:0015031	PTHR12443:SF9 (PANTHER); IPR004728 (PANTHER)	Yes	Yes	No	-
712	Mcal_712	G232G8W04JAIFH_leg	286	Yes	I	-	-	Yes	No	No	-
713	Mcal_713	G232G8W04JAJGW_leg	185	Yes	I	-	-	No	No	No	-
714	Mcal_714	G232G8W04JB2MQ_leg	360	Yes	I	-	-	No	No	No	-
715	Mcal_715	G232G8W04JBJJN_leg	350	Yes	I	-	SIGNAL_PEPTIDE (PHOBIUS); SIGNAL_PEPTIDE_N_REGION (PHOBIUS); SIGNAL_PEPTIDE_C_REGION (PHOBIUS); NON_CYTOPLASMIC_DOMAIN (PHOBIUS); SIGNAL_PEPTIDE_H_REGION (PHOBIUS); SignalP-noTM (SIGNALP_EUK); SignalP-TM (SIGNALP_GRAM_POSITIVE)	Yes	No	No	-
716	Mcal_716	G232G8W04JBOSD_leg	345	Yes	I	-	-	No	No	No	-
717	Mcal_717	G232G8W04JBSED_leg	188	Yes	I	-	-	No	No	No	-
718	Mcal_718	G232G8W04JBSOU_leg	423	Yes	I	-	-	Yes	No	No	-
719	Mcal_719	G232G8W04JC0TI_leg	452	Yes	I	F:GO:0004672; F:GO:0005524; P:GO:0006468	IPR000719 (PFAM); G3DSA:1.10.510.10 (GENE3D); PTHR22967 (PANTHER); IPR000719 (PROSITE_PROFILES); IPR011009 (SUPERFAMILY)	Yes	Yes	No	-
720	Mcal_720	G232G8W04JC25Z_leg	353	Yes	I	-	IPR002181 (PFAM); IPR014716 (G3DSA:3.90.215.GENE3D); IPR002181 (PROSITE_PROFILES); IPR002181 (SUPERFAMILY)	Yes	No	No	-
721	Mcal_721	G232G8W04JC2TN_leg	117	Yes	I	-	-	No	No	No	-
722	Mcal_722	G232G8W04JC3BX_leg	362	Yes	I	-	-	No	No	No	-
723	Mcal_723	G232G8W04JCDZW_leg	160	Yes	I	-	SIGNAL_PEPTIDE_H_REGION (PHOBIUS); NON_CYTOPLASMIC_DOMAIN (PHOBIUS); CYTOPLASMIC_DOMAIN (PHOBIUS); SIGNAL_PEPTIDE (PHOBIUS); SIGNAL_PEPTIDE_N_REGION (PHOBIUS); SIGNAL_PEPTIDE_C_REGION (PHOBIUS); TRANSMEMBRANE (PHOBIUS); TMhelix (TMHMM); TMhelix (TMHMM)	No	No	No	-
724	Mcal_724	G232G8W04JCK1C_leg	360	Yes	I	-	-	No	No	No	-
725	Mcal_725	G232G8W04JCLGK_leg	445	Yes	I	-	IPR008775 (PFAM); G3DSA:2.60.120.620 (GENE3D); PTHR20883 (PANTHER); PTHR20883:SF2 (PANTHER); SSF51197 (SUPERFAMILY)	Yes	No	No	-
726	Mcal_726	G232G8W04JCQJ4_leg	401	Yes	I	-	-	Yes	Yes	No	-
727	Mcal_727	G232G8W04JCWSB_leg	342	Yes	I	-	-	No	No	No	-
728	Mcal_728	G232G8W04JCXTX_leg	377	Yes	I	C:GO:0005743; P:GO:0055114; F:GO:0004129	-	Yes	No	No	map00190
729	Mcal_729	G232G8W04JD11Y_leg	184	Yes	I	C:GO:0005682; F:GO:0017070; P:GO:0000398; F:GO:0005515; C:GO:0016607; F:GO:0030623; C:GO:0071013	IPR012984 (PFAM); PTHR11140:SF0 (PANTHER); IPR027652 (PANTHER)	Yes	No	Yes	-
730	Mcal_730	G232G8W04JD1X1_leg	134	Yes	I	-	-	No	No	No	-
731	Mcal_731	G232G8W04JD3D3_leg	105	Yes	I	-	-	No	No	No	-
732	Mcal_732	G232G8W04JD78X_leg	350	Yes	I	F:GO:0016301; F:GO:0005524; P:GO:0016310	IPR022413 (G3DSA:1.10.135.GENE3D); IPR022413 (PFAM); IPR014746 (G3DSA:3.30.590.GENE3D); IPR022414 (PFAM); PTHR11547 (PANTHER); IPR022414 (PROSITE_PROFILES); IPR022413 (PROSITE_PROFILES); IPR022413 (SUPERFAMILY); SSF55931 (SUPERFAMILY)	Yes	No	No	-
733	Mcal_733	G232G8W04JD7HM_leg	165	Yes	I	F:GO:0030246; F:GO:0004252; F:GO:0016787; P:GO:0042381; F:GO:0008236; C:GO:0005576; F:GO:0003824; F:GO:0008233; P:GO:0006508; P:GO:0007155	-	Yes	No	No	-
734	Mcal_734	G232G8W04JD80K_leg	366	Yes	I	-	-	No	No	No	-
735	Mcal_735	G232G8W04JD93J_leg	368	Yes	I	F:GO:0015450; C:GO:0016020; P:GO:0006605	IPR023391 (G3DSA:1.20.5.GENE3D); IPR001901 (PFAM); PTHR12309 (PANTHER); IPR001901 (PROSITE_PATTERNS); NON_CYTOPLASMIC_DOMAIN (PHOBIUS); CYTOPLASMIC_DOMAIN (PHOBIUS); TRANSMEMBRANE (PHOBIUS); IPR023391 (SUPERFAMILY)	Yes	Yes	Yes	-
736	Mcal_736	G232G8W04JDFEG_leg	221	Yes	I	-	CYTOPLASMIC_DOMAIN (PHOBIUS); TRANSMEMBRANE (PHOBIUS); CYTOPLASMIC_DOMAIN (PHOBIUS); NON_CYTOPLASMIC_DOMAIN (PHOBIUS); TRANSMEMBRANE (PHOBIUS); TMhelix (TMHMM); TMhelix (TMHMM)	No	No	No	-
737	Mcal_737	G232G8W04JDFHK_leg	235	Yes	I	-	-	Yes	No	No	-
738	Mcal_738	G232G8W04JDFQ6_leg	377	Yes	I	-	-	No	No	No	-
739	Mcal_739	G232G8W04JDFYM_leg	373	Yes	I	-	-	No	No	No	-
740	Mcal_740	G232G8W04JDG5S_leg	368	Yes	I	-	TRANSMEMBRANE (PHOBIUS); CYTOPLASMIC_DOMAIN (PHOBIUS); NON_CYTOPLASMIC_DOMAIN (PHOBIUS)	No	No	No	-
741	Mcal_741	G232G8W04JDQOB_leg	394	Yes	I	-	NON_CYTOPLASMIC_DOMAIN (PHOBIUS); TRANSMEMBRANE (PHOBIUS); CYTOPLASMIC_DOMAIN (PHOBIUS); TMhelix (TMHMM)	No	No	No	-
742	Mcal_742	G232G8W04JDUYI_leg	149	Yes	I	-	-	No	No	No	-
743	Mcal_743	G232G8W04JE0YW_leg	250	Yes	I	-	-	No	No	No	-
744	Mcal_744	G232G8W04JE3Y7_leg	390	Yes	I	-	TMhelix (TMHMM)	No	No	No	-
745	Mcal_745	G232G8W04JEK91_leg	323	Yes	I	-	-	No	No	No	-
746	Mcal_746	G232G8W04JEL0I_leg	104	Yes	I	-	-	No	No	No	-
747	Mcal_747	G232G8W04JELPR_leg	430	Yes	I	F:GO:0031404; C:GO:0005615; P:GO:0015671; F:GO:0016491; F:GO:0005507; F:GO:0005344; P:GO:0051259; P:GO:0055114	-	Yes	No	No	-
748	Mcal_748	G232G8W04JEXB0_leg	339	Yes	I	-	SIGNAL_PEPTIDE_N_REGION (PHOBIUS); SIGNAL_PEPTIDE_C_REGION (PHOBIUS); SIGNAL_PEPTIDE (PHOBIUS); NON_CYTOPLASMIC_DOMAIN (PHOBIUS); SIGNAL_PEPTIDE_H_REGION (PHOBIUS); SignalP-noTM (SIGNALP_EUK)	No	No	No	-
749	Mcal_749	G232G8W04JEXQ9_leg	127	Yes	I	-	TRANSMEMBRANE (PHOBIUS); CYTOPLASMIC_DOMAIN (PHOBIUS); NON_CYTOPLASMIC_DOMAIN (PHOBIUS); TMhelix (TMHMM)	No	No	No	-
750	Mcal_750	G232G8W04JF33A_leg	359	Yes	I	-	-	No	No	No	-
751	Mcal_751	G232G8W04JF3M8_leg	350	Yes	I	-	TRANSMEMBRANE (PHOBIUS); NON_CYTOPLASMIC_DOMAIN (PHOBIUS); CYTOPLASMIC_DOMAIN (PHOBIUS); TMhelix (TMHMM)	No	No	No	-
752	Mcal_752	G232G8W04JFFOL_leg	308	Yes	I	-	-	No	No	No	-
753	Mcal_753	G232G8W04JFSGO_leg	160	Yes	I	-	-	Yes	No	No	-
754	Mcal_754	G232G8W04JFVT8_leg	457	Yes	I	-	CYTOPLASMIC_DOMAIN (PHOBIUS); NON_CYTOPLASMIC_DOMAIN (PHOBIUS); TRANSMEMBRANE (PHOBIUS)	No	No	No	-
755	Mcal_755	G232G8W04JG2PI_leg	264	Yes	I	F:GO:0004013; P:GO:0006730	G3DSA:3.40.50.1480 (GENE3D); IPR000043 (PFAM); IPR000043 (PANTHER); SSF52283 (SUPERFAMILY)	Yes	Yes	Yes	map00270
756	Mcal_756	G232G8W04JG5YE_leg	280	Yes	I	-	-	Yes	No	No	-
757	Mcal_757	G232G8W04JG7DA_leg	240	Yes	I	-	-	No	No	No	-
758	Mcal_758	G232G8W04JGBVE_leg	292	Yes	I	F:GO:0003676; F:GO:0000166	IPR000504 (PFAM); IPR012677 (G3DSA:3.30.70.GENE3D); PTHR24011 (PANTHER); PTHR24011:SF271 (PANTHER); IPR000504 (PROSITE_PROFILES); SSF54928 (SUPERFAMILY)	Yes	Yes	No	-
759	Mcal_759	G232G8W04JGKP9_leg	221	Yes	I	-	-	No	No	No	-
760	Mcal_760	G232G8W04JGMN3_leg	179	Yes	I	-	CYTOPLASMIC_DOMAIN (PHOBIUS); TRANSMEMBRANE (PHOBIUS); NON_CYTOPLASMIC_DOMAIN (PHOBIUS); TMhelix (TMHMM)	Yes	Yes	Yes	-
761	Mcal_761	G232G8W04JGTQJ_leg	171	Yes	I	-	-	No	No	No	-
762	Mcal_762	G232G8W04JGUZA_leg	161	Yes	I	-	-	No	No	No	-
763	Mcal_763	G232G8W04JH21K_leg	356	Yes	I	F:GO:0016740; F:GO:0016757	IPR013174 (PFAM); PTHR16433 (PANTHER); PTHR16433:SF0 (PANTHER); SIGNAL_PEPTIDE (PHOBIUS); SIGNAL_PEPTIDE_C_REGION (PHOBIUS); TRANSMEMBRANE (PHOBIUS); CYTOPLASMIC_DOMAIN (PHOBIUS); SIGNAL_PEPTIDE_H_REGION (PHOBIUS); SIGNAL_PEPTIDE_N_REGION (PHOBIUS); NON_CYTOPLASMIC_DOMAIN (PHOBIUS); SignalP-TM (SIGNALP_EUK); TMhelix (TMHMM); TMhelix (TMHMM)	Yes	No	No	-
764	Mcal_764	G232G8W04JHOM4_leg	200	Yes	I	-	-	No	No	No	-
765	Mcal_765	G232G8W04JHT12_leg	357	Yes	I	-	-	Yes	No	No	-
766	Mcal_766	G232G8W04JHVTW_leg	246	Yes	I	-	-	Yes	No	No	-
767	Mcal_767	G232G8W04JHW3I_leg	424	Yes	I	-	-	No	No	No	-
768	Mcal_768	G232G8W04JI0B1_leg	286	Yes	I	-	-	Yes	No	No	-
769	Mcal_769	G232G8W04JI15M_leg	352	Yes	I	F:GO:0008168; F:GO:0016740; P:GO:0032259	-	Yes	No	No	-
770	Mcal_770	G232G8W04JI55T_leg	316	Yes	I	-	-	Yes	No	No	-
771	Mcal_771	G232G8W04JI8JR_leg	335	Yes	I	-	-	Yes	No	No	-
772	Mcal_772	G232G8W04JI9ET_leg	348	Yes	I	-	-	Yes	No	No	-
773	Mcal_773	G232G8W04JIIUU_leg	131	Yes	I	-	SIGNAL_PEPTIDE_C_REGION (PHOBIUS); SIGNAL_PEPTIDE_N_REGION (PHOBIUS); NON_CYTOPLASMIC_DOMAIN (PHOBIUS); SIGNAL_PEPTIDE_H_REGION (PHOBIUS); SIGNAL_PEPTIDE (PHOBIUS); SignalP-noTM (SIGNALP_GRAM_NEGATIVE); SignalP-noTM (SIGNALP_EUK)	No	No	No	-
774	Mcal_774	G232G8W04JILKX_leg	426	Yes	I	-	CYTOPLASMIC_DOMAIN (PHOBIUS); TRANSMEMBRANE (PHOBIUS); NON_CYTOPLASMIC_DOMAIN (PHOBIUS); TMhelix (TMHMM)	No	No	No	-
775	Mcal_775	G232G8W04JISU5_leg	412	Yes	I	-	Coil (COILS); IPR012879 (PFAM); IPR012879 (PANTHER)	Yes	No	No	-
776	Mcal_776	G232G8W04JIYEN_leg	284	Yes	I	-	-	Yes	No	No	-
777	Mcal_777	G232G8W04JJ0U1_leg	267	Yes	I	F:GO:0016787; F:GO:0004812	G3DSA:3.80.10.10 (GENE3D); PTHR10947:SF2 (PANTHER); PTHR10947 (PANTHER); SignalP-noTM (SIGNALP_EUK); SSF52058 (SUPERFAMILY)	Yes	No	No	-
778	Mcal_778	G232G8W04JJ9I8_leg	325	Yes	I	C:GO:0016021; P:GO:0055085	CYTOPLASMIC_DOMAIN (PHOBIUS); NON_CYTOPLASMIC_DOMAIN (PHOBIUS); NON_CYTOPLASMIC_DOMAIN (PHOBIUS); TRANSMEMBRANE (PHOBIUS); TRANSMEMBRANE (PHOBIUS); TMhelix (TMHMM)	Yes	No	No	-
779	Mcal_779	G232G8W04JJA8J_leg	197	Yes	I	-	TMhelix (TMHMM)	No	No	No	-
780	Mcal_780	G232G8W04JJH5U_leg	457	Yes	I	P:GO:0006937; C:GO:0005861	-	Yes	No	No	-
781	Mcal_781	G232G8W04JJJBL_leg	128	Yes	I	-	-	No	No	No	-
782	Mcal_782	G232G8W04JJMDR_leg	285	Yes	I	-	-	No	No	No	-
783	Mcal_783	G232G8W04JJNM3_leg	197	Yes	I	-	-	No	No	No	-
784	Mcal_784	G232G8W04JJQE6_leg	411	Yes	I	P:GO:0006810; C:GO:0016021	-	Yes	Yes	Yes	-
785	Mcal_785	G232G8W04JJS61_leg	102	Yes	I	-	-	No	No	No	-
786	Mcal_786	G232G8W04JJTFB_leg	321	Yes	I	-	TRANSMEMBRANE (PHOBIUS); NON_CYTOPLASMIC_DOMAIN (PHOBIUS); CYTOPLASMIC_DOMAIN (PHOBIUS); TMhelix (TMHMM)	No	No	No	-
787	Mcal_787	G232G8W04JJTKE_leg	415	Yes	I	F:GO:0016740; F:GO:0005515	IPR012336 (G3DSA:3.40.30.GENE3D); IPR004045 (PFAM); IPR012336 (SUPERFAMILY)	Yes	No	No	-
788	Mcal_788	G232G8W04JJUHV_leg	151	Yes	I	-	-	No	No	No	-
789	Mcal_789	G232G8W04JK3R7_leg	429	Yes	I	-	-	No	No	No	-
790	Mcal_790	G232G8W04JK441_leg	264	Yes	I	-	G3DSA:3.30.497.10 (GENE3D); SIGNAL_PEPTIDE_N_REGION (PHOBIUS); SIGNAL_PEPTIDE (PHOBIUS); NON_CYTOPLASMIC_DOMAIN (PHOBIUS); SIGNAL_PEPTIDE_C_REGION (PHOBIUS); SIGNAL_PEPTIDE_H_REGION (PHOBIUS); SignalP-noTM (SIGNALP_GRAM_NEGATIVE); SignalP-TM (SIGNALP_GRAM_POSITIVE); SignalP-noTM (SIGNALP_EUK); IPR023796 (SUPERFAMILY)	Yes	No	No	-
791	Mcal_791	G232G8W04JK61W_leg	304	Yes	I	-	-	No	No	No	-
792	Mcal_792	G232G8W04JK7C7_leg	330	Yes	I	-	-	No	No	No	-
793	Mcal_793	G232G8W04JKEXH_leg	466	Yes	I	C:GO:0005639; F:GO:0000166	-	Yes	No	No	-
794	Mcal_794	G232G8W04JKFI9_leg	150	Yes	I	-	SignalP-noTM (SIGNALP_EUK)	No	No	No	-
795	Mcal_795	G232G8W04JKKB7_leg	284	Yes	I	P:GO:0006457; F:GO:0005524; F:GO:0051082; F:GO:0032440; P:GO:0055114	-	Yes	Yes	Yes	-
796	Mcal_796	G232G8W04JKNOK_leg	374	Yes	I	F:GO:0008898	IPR003726 (PFAM); IPR003726 (G3DSA:3.20.20.GENE3D); PTHR21091:SF94 (PANTHER); PTHR21091 (PANTHER); IPR003726 (SUPERFAMILY)	Yes	No	No	map00270
797	Mcal_797	G232G8W04JKT0I_leg	418	Yes	I	-	-	No	No	No	-
798	Mcal_798	G232G8W04JKZAD_leg	209	Yes	I	-	-	No	No	No	-
799	Mcal_799	G232G8W04JKZPS_leg	120	Yes	I	-	-	No	No	No	-
800	Mcal_800	G232G8W04JL055_leg	119	Yes	I	-	-	No	No	No	-
801	Mcal_801	G232G8W04JL1DL_leg	229	Yes	I	-	-	Yes	No	No	-
802	Mcal_802	G232G8W04JL9PY_leg	218	Yes	I	F:GO:0008270	-	Yes	No	No	-
803	Mcal_803	G232G8W04JLFWX_leg	450	Yes	I	F:GO:0042302	-	Yes	No	No	-
804	Mcal_804	G232G8W04JLWZ2_leg	384	Yes	I	P:GO:0016925; F:GO:0008022; F:GO:0019948	IPR016040 (G3DSA:3.40.50.GENE3D); IPR000594 (PFAM); PTHR10953 (PANTHER); IPR009036 (SUPERFAMILY)	Yes	Yes	Yes	-
805	Mcal_805	G232G8W04JM4GS_leg	297	Yes	I	P:GO:0006468; F:GO:0005524; F:GO:0004674	-	Yes	No	No	-
806	Mcal_806	G232G8W04JM5HT_leg	217	Yes	I	-	-	No	No	No	-
807	Mcal_807	G232G8W04JM6N4_leg	401	Yes	I	-	-	No	No	No	-
808	Mcal_808	G232G8W04JM904_leg	374	Yes	I	-	SIGNAL_PEPTIDE (PHOBIUS); SIGNAL_PEPTIDE_H_REGION (PHOBIUS); SIGNAL_PEPTIDE_C_REGION (PHOBIUS); NON_CYTOPLASMIC_DOMAIN (PHOBIUS); SIGNAL_PEPTIDE_N_REGION (PHOBIUS); SignalP-noTM (SIGNALP_EUK); TMhelix (TMHMM)	Yes	No	No	-
809	Mcal_809	G232G8W04JMAKW_leg	192	Yes	I	-	-	No	No	No	-
810	Mcal_810	G232G8W04JMAVD_leg	270	Yes	I	-	-	No	No	No	-
811	Mcal_811	G232G8W04JMJYO_leg	358	Yes	I	-	CYTOPLASMIC_DOMAIN (PHOBIUS); NON_CYTOPLASMIC_DOMAIN (PHOBIUS); TRANSMEMBRANE (PHOBIUS); TRANSMEMBRANE (PHOBIUS); CYTOPLASMIC_DOMAIN (PHOBIUS); TMhelix (TMHMM)	No	No	No	-
812	Mcal_812	G232G8W04JMMAC_leg	369	Yes	I	-	-	No	No	No	-
813	Mcal_813	G232G8W04JMOKH_leg	100	Yes	I	-	-	No	No	No	-
814	Mcal_814	G232G8W04JMQV2_leg	368	Yes	I	-	CYTOPLASMIC_DOMAIN (PHOBIUS); TRANSMEMBRANE (PHOBIUS); NON_CYTOPLASMIC_DOMAIN (PHOBIUS); TMhelix (TMHMM)	Yes	No	No	-
815	Mcal_815	G232G8W04JMUCM_leg	344	Yes	I	F:GO:0016810	IPR011059 (G3DSA:2.30.40.GENE3D); PTHR11647 (PANTHER); IPR011059 (SUPERFAMILY)	Yes	No	No	-
816	Mcal_816	G232G8W04JMV5A_leg	269	Yes	I	-	-	No	No	No	-
817	Mcal_817	G232G8W04JN1Q8_leg	412	Yes	I	F:GO:0050660; F:GO:0050661; P:GO:0006809; F:GO:0005506; F:GO:0010181; F:GO:0020037; F:GO:0004517; F:GO:0005516; P:GO:0055114	G3DSA:3.40.50.80 (GENE3D); PTHR19384 (PANTHER); PTHR19384:SF53 (PANTHER); SSF52343 (SUPERFAMILY)	Yes	Yes	Yes	map00330
818	Mcal_818	G232G8W04JN6QD_leg	292	Yes	I	-	TRANSMEMBRANE (PHOBIUS); CYTOPLASMIC_DOMAIN (PHOBIUS); NON_CYTOPLASMIC_DOMAIN (PHOBIUS); TMhelix (TMHMM)	No	No	No	-
819	Mcal_819	G232G8W04JNA19_leg	117	Yes	I	-	-	No	No	No	-
820	Mcal_820	G232G8W04JNAAF_leg	336	Yes	I	-	IPR023139 (G3DSA:1.10.3560.GENE3D); IPR021148 (PFAM); IPR008476 (PANTHER)	Yes	No	No	-
821	Mcal_821	G232G8W04JNALL_leg	239	Yes	I	-	-	No	No	No	-
822	Mcal_822	G232G8W04JNDBI_leg	354	Yes	I	P:GO:0065007; C:GO:0005615	IPR023796 (PFAM); G3DSA:2.30.39.10 (GENE3D); IPR000215 (PANTHER); IPR023796 (SUPERFAMILY)	Yes	No	No	-
823	Mcal_823	G232G8W04JNFEF_leg	101	Yes	I	-	-	No	No	No	-
824	Mcal_824	G232G8W04JNSBM_leg	392	Yes	I	F:GO:0004222; P:GO:0006508	IPR024079 (G3DSA:3.40.390.GENE3D); IPR018497 (PFAM); IPR000718 (PANTHER); SSF55486 (SUPERFAMILY)	Yes	No	No	-
825	Mcal_825	G232G8W04JO4AX_leg	212	Yes	I	-	-	No	No	No	-
826	Mcal_826	G232G8W04JO6CQ_leg	245	Yes	I	-	-	No	No	No	-
827	Mcal_827	G232G8W04JO92R_leg	440	Yes	I	-	NON_CYTOPLASMIC_DOMAIN (PHOBIUS); TRANSMEMBRANE (PHOBIUS); CYTOPLASMIC_DOMAIN (PHOBIUS); TMhelix (TMHMM)	Yes	No	No	-
828	Mcal_828	G232G8W04JOC21_leg	248	Yes	I	-	SIGNAL_PEPTIDE_N_REGION (PHOBIUS); NON_CYTOPLASMIC_DOMAIN (PHOBIUS); SIGNAL_PEPTIDE_C_REGION (PHOBIUS); SIGNAL_PEPTIDE (PHOBIUS); SIGNAL_PEPTIDE_H_REGION (PHOBIUS); SignalP-noTM (SIGNALP_EUK)	No	No	No	-
829	Mcal_829	G232G8W04JOD1Y_leg	107	Yes	I	-	-	No	No	No	-
830	Mcal_830	G232G8W04JOU3A_leg	281	Yes	I	P:GO:0055114; F:GO:0016491	-	Yes	No	No	-
831	Mcal_831	G232G8W04JOVR7_leg	333	Yes	I	C:GO:0005840; F:GO:0003735; P:GO:0006412; F:GO:0019843	NON_CYTOPLASMIC_DOMAIN (PHOBIUS); TRANSMEMBRANE (PHOBIUS); CYTOPLASMIC_DOMAIN (PHOBIUS); TMhelix (TMHMM)	Yes	No	No	-
832	Mcal_832	G232G8W04JOZYP_leg	142	Yes	I	-	-	No	No	No	-
833	Mcal_833	G232G8W04JP010_leg	119	Yes	I	-	-	No	No	No	-
834	Mcal_834	G232G8W04JP631_leg	346	Yes	I	-	-	No	No	No	-
835	Mcal_835	G232G8W04JP94W_leg	305	Yes	I	-	-	Yes	No	No	-
836	Mcal_836	G232G8W04JPAUQ_leg	264	Yes	I	-	-	No	No	No	-
837	Mcal_837	G232G8W04JPBR3_leg	313	Yes	I	F:GO:0008270	-	Yes	Yes	No	-
838	Mcal_838	G232G8W04JPKOP_leg	339	Yes	I	C:GO:0005856; C:GO:0005737; F:GO:0005524	G3DSA:3.30.420.40 (GENE3D); IPR004000 (PFAM); IPR004000 (PANTHER); PTHR11937:SF178 (PANTHER); SSF53067 (SUPERFAMILY)	Yes	Yes	Yes	-
839	Mcal_839	G232G8W04JPVYB_leg	336	Yes	I	C:GO:0005737; P:GO:0006457; F:GO:0005524; F:GO:0051082	IPR002423 (PFAM); IPR027413 (G3DSA:1.10.560.GENE3D); IPR002423 (SUPERFAMILY)	Yes	Yes	Yes	-
840	Mcal_840	G232G8W04JPWVJ_leg	261	Yes	I	-	-	Yes	No	No	-
841	Mcal_841	G232G8W04JPZ2F_leg	383	Yes	I	-	-	Yes	No	No	-
842	Mcal_842	G232G8W04JQ1H3_leg	109	Yes	I	-	-	No	No	No	-
843	Mcal_843	G232G8W04JQ58Y_leg	309	Yes	I	-	TRANSMEMBRANE (PHOBIUS); NON_CYTOPLASMIC_DOMAIN (PHOBIUS); CYTOPLASMIC_DOMAIN (PHOBIUS)	Yes	No	No	-
844	Mcal_844	G232G8W04JQ8PQ_leg	117	Yes	I	-	-	No	No	No	-
845	Mcal_845	G232G8W04JQJ1A_leg	331	Yes	I	C:GO:0016021	IPR002995 (PFAM); PTHR23427:SF1 (PANTHER); PTHR23427 (PANTHER); NON_CYTOPLASMIC_DOMAIN (PHOBIUS); NON_CYTOPLASMIC_DOMAIN (PHOBIUS); CYTOPLASMIC_DOMAIN (PHOBIUS); TRANSMEMBRANE (PHOBIUS); CYTOPLASMIC_DOMAIN (PHOBIUS); TRANSMEMBRANE (PHOBIUS); TRANSMEMBRANE (PHOBIUS); TMhelix (TMHMM); TMhelix (TMHMM)	Yes	No	No	-
846	Mcal_846	G232G8W04JQM5O_leg	131	Yes	I	-	-	Yes	No	No	-
847	Mcal_847	G232G8W04JQR2R_leg	281	Yes	I	-	-	No	No	No	-
848	Mcal_848	G232G8W04JQWF5_leg	130	Yes	I	-	-	No	No	No	-
849	Mcal_849	G232G8W04JR3PO_leg	127	Yes	I	-	-	No	No	No	-
850	Mcal_850	G232G8W04JR405_leg	245	Yes	I	-	SignalP-noTM (SIGNALP_EUK)	Yes	No	No	-
851	Mcal_851	G232G8W04JR6J8_leg	429	Yes	I	-	TMhelix (TMHMM)	No	No	No	-
852	Mcal_852	G232G8W04JR6W0_leg	171	Yes	I	-	-	Yes	No	No	-
853	Mcal_853	G232G8W04JRDQZ_leg	221	Yes	I	-	-	No	No	No	-
854	Mcal_854	G232G8W04JRHEQ_leg	329	Yes	I	-	-	Yes	No	No	-
855	Mcal_855	G232G8W04JRISG_leg	405	Yes	I	P:GO:0006810; C:GO:0031966	IPR023395 (G3DSA:1.50.40.GENE3D); IPR018108 (PFAM); PTHR24089:SF207 (PANTHER); PTHR24089 (PANTHER); IPR018108 (PROSITE_PROFILES); IPR023395 (SUPERFAMILY)	Yes	Yes	Yes	-
856	Mcal_856	G232G8W04JRJOX_leg	152	Yes	I	-	NON_CYTOPLASMIC_DOMAIN (PHOBIUS); CYTOPLASMIC_DOMAIN (PHOBIUS); TRANSMEMBRANE (PHOBIUS); TMhelix (TMHMM)	No	No	No	-
857	Mcal_857	G232G8W04JROGF_leg	166	Yes	I	-	IPR004000 (PFAM); G3DSA:3.30.420.40 (GENE3D); IPR004000 (PANTHER); PTHR11937:SF193 (PANTHER)	Yes	No	No	-
858	Mcal_858	G232G8W04JRTBI_leg	358	Yes	I	-	-	No	No	No	-
859	Mcal_859	G232G8W04JS0IK_leg	308	Yes	I	-	-	No	No	No	-
860	Mcal_860	G232G8W04JS74S_leg	282	Yes	I	-	-	No	No	No	-
861	Mcal_861	G232G8W04JS8J4_leg	366	Yes	I	-	-	Yes	No	No	-
862	Mcal_862	G232G8W04JS9LE_leg	328	Yes	I	-	-	Yes	No	No	-
863	Mcal_863	G232G8W04JSG5S_leg	285	Yes	I	-	-	No	No	No	-
864	Mcal_864	G232G8W04JSG85_leg	139	Yes	I	-	-	No	No	No	-
865	Mcal_865	G232G8W04JSLPC_leg	147	Yes	I	-	-	No	No	No	-
866	Mcal_866	G232G8W04JSMUV_leg	269	Yes	I	-	-	No	No	No	-
867	Mcal_867	G232G8W04JSNN8_leg	110	Yes	I	-	-	No	No	No	-
868	Mcal_868	G232G8W04JSOMF_leg	321	Yes	I	F:GO:0005506; F:GO:0009055; F:GO:0020037	IPR002326 (PFAM); G3DSA:1.20.5.100 (GENE3D); IPR002326 (PANTHER); CYTOPLASMIC_DOMAIN (PHOBIUS); TRANSMEMBRANE (PHOBIUS); NON_CYTOPLASMIC_DOMAIN (PHOBIUS); IPR021157 (SUPERFAMILY); TMhelix (TMHMM)	Yes	Yes	Yes	-
869	Mcal_869	G232G8W04JSW6M_leg	308	Yes	I	-	-	Yes	No	No	-
870	Mcal_870	G232G8W04JT31T_leg	390	Yes	I	-	SIGNAL_PEPTIDE_N_REGION (PHOBIUS); SIGNAL_PEPTIDE_C_REGION (PHOBIUS); SIGNAL_PEPTIDE (PHOBIUS); NON_CYTOPLASMIC_DOMAIN (PHOBIUS); SIGNAL_PEPTIDE_H_REGION (PHOBIUS)	Yes	No	No	-
871	Mcal_871	G232G8W04JT3BE_leg	195	Yes	I	-	-	No	No	No	-
872	Mcal_872	G232G8W04JT7QV_leg	250	Yes	I	P:GO:0006096; F:GO:0004332	IPR013785 (G3DSA:3.20.20.GENE3D); IPR000741 (PFAM)	Yes	No	No	map00030 map00680 map00710 map00010 map00051
873	Mcal_873	G232G8W04JTCZG_leg	361	Yes	I	-	-	No	No	No	-
874	Mcal_874	G232G8W04JTEFF_leg	107	Yes	I	-	-	No	No	No	-
875	Mcal_875	G232G8W04JTH1J_leg	296	Yes	I	-	-	No	No	No	-
876	Mcal_876	G232G8W04JTHLS_leg	130	Yes	I	P:GO:0055114; F:GO:0016491; F:GO:0008270	IPR016040 (G3DSA:3.40.50.GENE3D); SSF51735 (SUPERFAMILY)	Yes	No	No	-
877	Mcal_877	G232G8W04JU997_leg	160	Yes	I	-	-	No	No	No	-
878	Mcal_878	G232G8W04JUCHX_leg	293	Yes	I	-	-	No	No	No	-
879	Mcal_879	G232G8W04JUHAH_leg	453	Yes	I	P:GO:0006659	-	Yes	Yes	No	-
880	Mcal_880	G232G8W04JUL3E_leg	126	Yes	I	-	-	Yes	No	No	-
881	Mcal_881	G232G8W04JUMOU_leg	310	Yes	I	C:GO:0005737	-	Yes	No	No	-
882	Mcal_882	G232G8W04JUY1F_leg	366	Yes	I	C:GO:0005811; F:GO:0017064; F:GO:0016884	IPR023631 (G3DSA:3.90.1300.GENE3D); PTHR11895:SF66 (PANTHER); IPR000120 (PANTHER); CYTOPLASMIC_DOMAIN (PHOBIUS); NON_CYTOPLASMIC_DOMAIN (PHOBIUS); TRANSMEMBRANE (PHOBIUS); IPR023631 (SUPERFAMILY)	Yes	No	No	-
883	Mcal_883	G232G8W04JV09L_leg	366	Yes	I	-	-	No	No	No	-
884	Mcal_884	G232G8W04JV2QX_leg	251	Yes	I	-	-	Yes	No	No	-
885	Mcal_885	G232G8W04JV559_leg	212	Yes	I	-	TMhelix (TMHMM)	No	No	No	-
886	Mcal_886	G232G8W04JV6ED_leg	146	Yes	I	-	-	No	No	No	-
887	Mcal_887	G232G8W04JVL3A_leg	408	Yes	I	-	CYTOPLASMIC_DOMAIN (PHOBIUS); TRANSMEMBRANE (PHOBIUS); NON_CYTOPLASMIC_DOMAIN (PHOBIUS); TMhelix (TMHMM)	Yes	No	No	-
888	Mcal_888	G232G8W04JVP4U_leg	318	Yes	I	C:GO:0005739	IPR016040 (G3DSA:3.40.50.GENE3D); PTHR24322 (PANTHER); PTHR24322:SF239 (PANTHER); SSF51735 (SUPERFAMILY)	Yes	No	No	-
889	Mcal_889	G232G8W04JVSFU_leg	214	Yes	I	-	-	Yes	No	No	-
890	Mcal_890	G232G8W04JWBO5_leg	466	Yes	I	F:GO:0000062	IPR000582 (PRINTS); IPR000582 (PFAM); IPR014352 (G3DSA:1.20.80.GENE3D); PTHR23310 (PANTHER); IPR022408 (PROSITE_PATTERNS); IPR000582 (PROSITE_PROFILES); IPR000582 (SUPERFAMILY)	Yes	No	Yes	-
891	Mcal_891	G232G8W04JWIRR_leg	234	Yes	I	-	-	Yes	No	No	-
892	Mcal_892	G232G8W04JWSIN_leg	349	Yes	I	-	-	No	No	No	-
893	Mcal_893	G232G8W04JWT90_leg	256	Yes	I	-	-	No	No	No	-
894	Mcal_894	G232G8W04JWVJR_leg	136	Yes	I	-	-	No	No	No	-
895	Mcal_895	G232G8W04JX0LQ_leg	462	Yes	I	F:GO:0004803; P:GO:0015074; P:GO:0006313; F:GO:0003677	-	Yes	No	No	-
896	Mcal_896	G232G8W04JX3KJ_leg	474	Yes	I	-	-	Yes	No	No	-
897	Mcal_897	G232G8W04JX6XD_leg	304	Yes	I	-	-	Yes	No	No	-
898	Mcal_898	G232G8W04JX9K4_leg	388	Yes	I	-	TMhelix (TMHMM)	No	No	No	-
899	Mcal_899	G232G8W04JXHER_leg	499	Yes	I	-	SIGNAL_PEPTIDE_C_REGION (PHOBIUS); SIGNAL_PEPTIDE (PHOBIUS); SIGNAL_PEPTIDE_H_REGION (PHOBIUS); SIGNAL_PEPTIDE_N_REGION (PHOBIUS); NON_CYTOPLASMIC_DOMAIN (PHOBIUS)	Yes	No	No	-
900	Mcal_900	G232G8W04JXM01_leg	352	Yes	I	-	-	No	No	No	-
901	Mcal_901	G232G8W04JXNS2_leg	332	Yes	I	-	-	Yes	No	No	-
902	Mcal_902	G232G8W04JXTZ6_leg	121	Yes	I	-	-	No	No	No	-
903	Mcal_903	G232G8W04JY5ER_leg	231	Yes	I	F:GO:0003677	SIGNAL_PEPTIDE_N_REGION (PHOBIUS); NON_CYTOPLASMIC_DOMAIN (PHOBIUS); SIGNAL_PEPTIDE_C_REGION (PHOBIUS); SIGNAL_PEPTIDE (PHOBIUS); SIGNAL_PEPTIDE_H_REGION (PHOBIUS); SignalP-noTM (SIGNALP_EUK)	Yes	No	No	-
904	Mcal_904	G232G8W04JY7NP_leg	156	Yes	I	-	TMhelix (TMHMM)	No	No	No	-
905	Mcal_905	G232G8W04JYH4Z_leg	274	Yes	I	-	NON_CYTOPLASMIC_DOMAIN (PHOBIUS); SIGNAL_PEPTIDE_N_REGION (PHOBIUS); SIGNAL_PEPTIDE_C_REGION (PHOBIUS); SIGNAL_PEPTIDE_H_REGION (PHOBIUS); SIGNAL_PEPTIDE (PHOBIUS); TMhelix (TMHMM)	Yes	No	No	-
906	Mcal_906	G232G8W04JYKRC_leg	179	Yes	I	-	TRANSMEMBRANE (PHOBIUS); NON_CYTOPLASMIC_DOMAIN (PHOBIUS); CYTOPLASMIC_DOMAIN (PHOBIUS); TMhelix (TMHMM)	No	No	No	-
907	Mcal_907	G232G8W04JYLJF_leg	161	Yes	I	-	CYTOPLASMIC_DOMAIN (PHOBIUS); TRANSMEMBRANE (PHOBIUS); NON_CYTOPLASMIC_DOMAIN (PHOBIUS); TMhelix (TMHMM)	No	No	No	-
908	Mcal_908	G232G8W04JYQWZ_leg	398	Yes	I	F:GO:0004360; P:GO:0016051; F:GO:0030246; F:GO:0004044	IPR029055 (G3DSA:3.60.20.GENE3D); IPR000583 (PFAM); PTHR10937 (PANTHER); IPR017932 (PROSITE_PROFILES); IPR029055 (SUPERFAMILY)	Yes	No	Yes	map00230 map00520 map00250 map00250
909	Mcal_909	G232G8W04JZ87B_leg	109	Yes	I	-	-	No	No	No	-
910	Mcal_910	G232G8W04JZAVI_leg	227	Yes	I	-	-	No	No	No	-
911	Mcal_911	G232G8W04JZDJ2_leg	411	Yes	I	P:GO:0044267; F:GO:0005524	IPR002423 (PFAM); IPR027409 (G3DSA:3.50.7.GENE3D); IPR002423 (PANTHER); PTHR11353:SF26 (PANTHER); IPR027409 (SUPERFAMILY)	Yes	Yes	Yes	-
912	Mcal_912	G232G8W04JZEIV_leg	290	Yes	I	-	CYTOPLASMIC_DOMAIN (PHOBIUS); TRANSMEMBRANE (PHOBIUS); NON_CYTOPLASMIC_DOMAIN (PHOBIUS); TMhelix (TMHMM)	No	No	No	-
913	Mcal_913	G232G8W04JZEJL_leg	459	Yes	I	-	-	No	No	No	-
914	Mcal_914	G232G8W04JZGIP_leg	106	Yes	I	-	-	No	No	No	-
915	Mcal_915	G232G8W04JZRQ2_leg	309	Yes	I	F:GO:0004104	NON_CYTOPLASMIC_DOMAIN (PHOBIUS); TRANSMEMBRANE (PHOBIUS); CYTOPLASMIC_DOMAIN (PHOBIUS)	Yes	No	No	-
916	Mcal_916	G232G8W04JZW0O_leg	201	Yes	I	-	-	No	No	No	-
917	Mcal_917	G232G8W04JZW78_leg	240	Yes	I	-	-	Yes	No	No	-
918	Mcal_918	G232G8W04JZWK3_leg	352	Yes	I	-	-	No	No	No	-
919	Mcal_919	G232G8W04JZWUD_leg	247	Yes	I	-	-	No	No	No	-
920	Mcal_920	contig00083	586	No	I	P:GO:0016192; P:GO:0006886; C:GO:0030117	IPR022775 (PFAM); G3DSA:3.30.450.60 (GENE3D); PTHR11043 (PANTHER); PTHR11043:SF0 (PANTHER); IPR011012 (SUPERFAMILY)	Yes	No	Yes	-
921	Mcal_921	isotig00162	1135	No	I	-	IPR016482 (PIRSF); IPR016482 (PFAM); IPR016482 (PANTHER); NON_CYTOPLASMIC_DOMAIN (PHOBIUS); CYTOPLASMIC_DOMAIN (PHOBIUS); TRANSMEMBRANE (PHOBIUS); TMhelix (TMHMM)	Yes	No	Yes	-
922	Mcal_922	isotig00227	1008	No	I	-	IPR006621 (SMART); PTHR11161 (PANTHER); PTHR11161:SF0 (PANTHER); CYTOPLASMIC_DOMAIN (PHOBIUS); TRANSMEMBRANE (PHOBIUS); TRANSMEMBRANE (PHOBIUS); CYTOPLASMIC_DOMAIN (PHOBIUS); NON_CYTOPLASMIC_DOMAIN (PHOBIUS); TMhelix (TMHMM); TMhelix (TMHMM)	Yes	No	No	-
923	Mcal_923	isotig00236	457	No	I	-	-	Yes	No	No	-
924	Mcal_924	isotig00254	984	No	I	-	NON_CYTOPLASMIC_DOMAIN (PHOBIUS); SIGNAL_PEPTIDE_C_REGION (PHOBIUS); SIGNAL_PEPTIDE (PHOBIUS); SIGNAL_PEPTIDE_H_REGION (PHOBIUS); SIGNAL_PEPTIDE_N_REGION (PHOBIUS); SignalP-noTM (SIGNALP_EUK)	Yes	No	No	-
925	Mcal_925	isotig00281	604	No	I	C:GO:0016020; P:GO:0055114; P:GO:0006633; F:GO:0004768; C:GO:0005783; F:GO:0005506	IPR015876 (PRINTS); IPR005804 (PFAM); PTHR11351 (PANTHER); IPR001522 (PROSITE_PATTERNS)	Yes	No	No	map01040
926	Mcal_926	isotig00334	806	No	I	F:GO:0008184; P:GO:0005975; F:GO:0030170	IPR000811 (PFAM); G3DSA:3.40.50.2000 (GENE3D); PTHR11468:SF5 (PANTHER); IPR000811 (PANTHER); SSF53756 (SUPERFAMILY)	Yes	No	No	-
927	Mcal_927	isotig00379	464	No	I	F:GO:0005200; F:GO:0005525; P:GO:0007017; P:GO:0051258; C:GO:0005881; F:GO:0003924	IPR002452 (PRINTS); IPR000217 (PRINTS); IPR003008 (SMART); IPR003008 (G3DSA:3.40.50.GENE3D); IPR003008 (PFAM); IPR000217 (PANTHER); IPR017975 (PROSITE_PATTERNS); IPR003008 (SUPERFAMILY)	Yes	Yes	Yes	-
928	Mcal_928	isotig00402	456	No	I	-	-	Yes	No	No	-
929	Mcal_929	isotig00403	410	No	I	-	-	Yes	No	No	-
930	Mcal_930	isotig00428	1160	No	I	P:GO:0006814; C:GO:0005890; P:GO:0006813	IPR000402 (PFAM); G3DSA:2.60.40.1660 (GENE3D); IPR000402 (PANTHER); PTHR11523:SF22 (PANTHER); NON_CYTOPLASMIC_DOMAIN (PHOBIUS); TRANSMEMBRANE (PHOBIUS); CYTOPLASMIC_DOMAIN (PHOBIUS); TMhelix (TMHMM)	Yes	No	No	-
931	Mcal_931	isotig00429	1058	No	I	P:GO:0006814; P:GO:0006813; C:GO:0005890	G3DSA:2.60.40.1660 (GENE3D); IPR000402 (PFAM); TRANSMEMBRANE (PHOBIUS); CYTOPLASMIC_DOMAIN (PHOBIUS); NON_CYTOPLASMIC_DOMAIN (PHOBIUS); TMhelix (TMHMM)	Yes	No	No	-
932	Mcal_932	isotig00449	959	No	I	P:GO:0006508; F:GO:0004252	IPR001254 (SMART); G3DSA:2.40.10.10 (GENE3D); IPR001254 (PFAM); G3DSA:2.40.10.10 (GENE3D); PTHR24268:SF81 (PANTHER); PTHR24268 (PANTHER); IPR018114 (PROSITE_PATTERNS); IPR001254 (PROSITE_PROFILES); IPR009003 (SUPERFAMILY)	Yes	No	No	-
933	Mcal_933	isotig00489	553	No	I	-	-	Yes	No	No	-
934	Mcal_934	isotig00495	535	No	I	F:GO:0008168; P:GO:0008152	IPR013216 (PFAM); IPR029063 (G3DSA:3.40.50.GENE3D); PTHR10108:SF718 (PANTHER); PTHR10108 (PANTHER); IPR029063 (SUPERFAMILY)	Yes	No	Yes	-
935	Mcal_935	isotig00499	482	No	I	-	-	No	No	No	-
936	Mcal_936	isotig00515	579	No	I	-	-	No	No	No	-
937	Mcal_937	isotig00539	457	No	I	P:GO:0055114; F:GO:0016491	PTHR12286:SF4 (PANTHER); PTHR12286 (PANTHER); CYTOPLASMIC_DOMAIN (PHOBIUS); NON_CYTOPLASMIC_DOMAIN (PHOBIUS); TRANSMEMBRANE (PHOBIUS); TMhelix (TMHMM)	Yes	No	No	-
938	Mcal_938	isotig00561	395	No	I	-	-	Yes	No	No	-
939	Mcal_939	isotig00569	366	No	I	-	-	Yes	No	No	-
940	Mcal_940	isotig00574	477	No	I	F:GO:0046933; P:GO:0015986; F:GO:0046961; C:GO:0000275	IPR006721 (PFAM); IPR006721 (G3DSA:1.10.1620.GENE3D); PTHR12448 (PANTHER); IPR006721 (SUPERFAMILY)	Yes	No	No	-
941	Mcal_941	isotig00580	421	No	I	-	-	No	No	No	-
942	Mcal_942	isotig00588	400	No	I	-	-	No	No	No	-
943	Mcal_943	isotig00659	1253	No	I	F:GO:0016747	-	Yes	No	No	-
944	Mcal_944	isotig00669	1176	No	I	F:GO:0005515	IPR020472 (PRINTS); IPR001680 (SMART); IPR015943 (G3DSA:2.130.10.GENE3D); IPR015943 (G3DSA:2.130.10.GENE3D); IPR001680 (PFAM); PTHR22844:SF166 (PANTHER); PTHR22844 (PANTHER); IPR019775 (PROSITE_PATTERNS); IPR019775 (PROSITE_PATTERNS); IPR001680 (PROSITE_PROFILES); IPR001680 (PROSITE_PROFILES); IPR001680 (PROSITE_PROFILES); IPR001680 (PROSITE_PROFILES); IPR001680 (PROSITE_PROFILES); IPR001680 (PRO…	Yes	Yes	Yes	-
945	Mcal_945	isotig00682	1122	No	I	-	CYTOPLASMIC_DOMAIN (PHOBIUS); TRANSMEMBRANE (PHOBIUS); NON_CYTOPLASMIC_DOMAIN (PHOBIUS); TMhelix (TMHMM)	Yes	No	No	-
946	Mcal_946	isotig00684	1114	No	I	C:GO:0016021	IPR002076 (PFAM); IPR002076 (PANTHER); TRANSMEMBRANE (PHOBIUS); TRANSMEMBRANE (PHOBIUS); CYTOPLASMIC_DOMAIN (PHOBIUS); TRANSMEMBRANE (PHOBIUS); NON_CYTOPLASMIC_DOMAIN (PHOBIUS); NON_CYTOPLASMIC_DOMAIN (PHOBIUS); TRANSMEMBRANE (PHOBIUS); TRANSMEMBRANE (PHOBIUS); CYTOPLASMIC_DOMAIN (PHOBIUS); CYTOPLASMIC_DOMAIN (PHOBIUS); TRANSMEMBRANE (PHOBIUS); TRANSMEMBRANE (PHOBIUS); NON_CYTOPLASMIC_DOMAIN (PHO…	Yes	No	No	-
947	Mcal_947	isotig00705	1029	No	I	P:GO:0008152; F:GO:0003824	CYTOPLASMIC_DOMAIN (PHOBIUS); CYTOPLASMIC_DOMAIN (PHOBIUS); TRANSMEMBRANE (PHOBIUS); NON_CYTOPLASMIC_DOMAIN (PHOBIUS); TRANSMEMBRANE (PHOBIUS); TMhelix (TMHMM); TMhelix (TMHMM)	Yes	No	No	-
948	Mcal_948	isotig00709	1021	No	I	-	SIGNAL_PEPTIDE_C_REGION (PHOBIUS); SIGNAL_PEPTIDE_N_REGION (PHOBIUS); SIGNAL_PEPTIDE (PHOBIUS); NON_CYTOPLASMIC_DOMAIN (PHOBIUS); SIGNAL_PEPTIDE_H_REGION (PHOBIUS); SignalP-noTM (SIGNALP_EUK)	Yes	No	No	-
949	Mcal_949	isotig00719	971	No	I	-	-	No	No	No	-
950	Mcal_950	isotig00780	878	No	I	F:GO:0046872; P:GO:0006816; F:GO:0005524; C:GO:0016021; F:GO:0005388	IPR001757 (TIGRFAM); PF13246 (PFAM); IPR008250 (PFAM); IPR023298 (G3DSA:1.20.1110.GENE3D); PTHR24093:SF280 (PANTHER); PTHR24093 (PANTHER); IPR018303 (PROSITE_PATTERNS); CYTOPLASMIC_DOMAIN (PHOBIUS); CYTOPLASMIC_DOMAIN (PHOBIUS); TRANSMEMBRANE (PHOBIUS); NON_CYTOPLASMIC_DOMAIN (PHOBIUS); TRANSMEMBRANE (PHOBIUS); SSF81665 (SUPERFAMILY); IPR023299 (SUPERFAMILY); TMhelix (TMHMM); TMhelix (TMHMM)	Yes	Yes	No	-
951	Mcal_951	isotig00784	869	No	I	-	PTHR11161 (PANTHER); NON_CYTOPLASMIC_DOMAIN (PHOBIUS); TRANSMEMBRANE (PHOBIUS); TRANSMEMBRANE (PHOBIUS); CYTOPLASMIC_DOMAIN (PHOBIUS); CYTOPLASMIC_DOMAIN (PHOBIUS); NON_CYTOPLASMIC_DOMAIN (PHOBIUS); TRANSMEMBRANE (PHOBIUS); TMhelix (TMHMM); TMhelix (TMHMM); TMhelix (TMHMM)	Yes	No	No	-
952	Mcal_952	isotig00785	866	No	I	F:GO:0005515	IPR001298 (SMART); IPR013783 (G3DSA:2.60.40.GENE3D); IPR013783 (G3DSA:2.60.40.GENE3D); IPR013783 (G3DSA:2.60.40.GENE3D); IPR017868 (PFAM); IPR013783 (G3DSA:2.60.40.GENE3D); PTHR11915 (PANTHER); IPR028559 (PTHR11915:PANTHER); IPR017868 (PROSITE_PROFILES); IPR017868 (PROSITE_PROFILES); IPR017868 (PROSITE_PROFILES); IPR014756 (SUPERFAMILY); IPR014756 (SUPERFAMILY); IPR014756 (SUPERFAMILY)	Yes	No	No	-
953	Mcal_953	isotig00787	862	No	I	-	-	Yes	No	No	-
954	Mcal_954	isotig00791	861	No	I	P:GO:0034184; P:GO:0000724; C:GO:0000781; C:GO:0016605; F:GO:0000166; P:GO:0045842; C:GO:0030915; P:GO:0090398; P:GO:0000722	-	Yes	Yes	Yes	-
955	Mcal_955	isotig00798	856	No	I	-	-	Yes	No	No	-
956	Mcal_956	isotig00862	783	No	I	-	SIGNAL_PEPTIDE_N_REGION (PHOBIUS); SIGNAL_PEPTIDE_C_REGION (PHOBIUS); SIGNAL_PEPTIDE (PHOBIUS); NON_CYTOPLASMIC_DOMAIN (PHOBIUS); SIGNAL_PEPTIDE_H_REGION (PHOBIUS); SignalP-noTM (SIGNALP_EUK); TMhelix (TMHMM)	No	No	No	-
957	Mcal_957	isotig00872	770	No	I	-	Coil (COILS); PTHR21532:SF0 (PANTHER); PTHR21532 (PANTHER)	Yes	No	No	-
958	Mcal_958	isotig00879	762	No	I	-	-	No	No	No	-
959	Mcal_959	isotig00893	748	No	I	C:GO:0016021; F:GO:0004190	IPR006639 (SMART); IPR007369 (PFAM); PTHR12174:SF23 (PANTHER); IPR007369 (PANTHER); CYTOPLASMIC_DOMAIN (PHOBIUS); TRANSMEMBRANE (PHOBIUS); NON_CYTOPLASMIC_DOMAIN (PHOBIUS); NON_CYTOPLASMIC_DOMAIN (PHOBIUS); CYTOPLASMIC_DOMAIN (PHOBIUS); TRANSMEMBRANE (PHOBIUS); TRANSMEMBRANE (PHOBIUS); TMhelix (TMHMM); TMhelix (TMHMM); TMhelix (TMHMM)	Yes	Yes	No	-
960	Mcal_960	isotig00897	741	No	I	-	IPR027911 (PFAM); PTHR31195 (PANTHER)	Yes	No	No	-
961	Mcal_961	isotig00917	727	No	I	F:GO:0016491; P:GO:0006520; P:GO:0055114	IPR006096 (SMART); IPR016040 (G3DSA:3.40.50.GENE3D); IPR006096 (PFAM); PTHR11606 (PANTHER); PTHR11606:SF10 (PANTHER); SSF51735 (SUPERFAMILY)	Yes	No	No	-
962	Mcal_962	isotig00944	699	No	I	P:GO:0006367; F:GO:0005524; C:GO:0005674; F:GO:0003824	IPR003196 (PFAM); IPR003196 (PANTHER); PTHR10445:SF0 (PANTHER); IPR011039 (SUPERFAMILY)	Yes	No	No	-
963	Mcal_963	isotig00958	697	No	I	F:GO:0080019	IPR026055 (PFAM); IPR026055 (PANTHER); TRANSMEMBRANE (PHOBIUS); NON_CYTOPLASMIC_DOMAIN (PHOBIUS); NON_CYTOPLASMIC_DOMAIN (PHOBIUS); CYTOPLASMIC_DOMAIN (PHOBIUS); TRANSMEMBRANE (PHOBIUS); TMhelix (TMHMM); TMhelix (TMHMM)	Yes	No	No	-
964	Mcal_964	isotig00964	687	No	I	F:GO:0004252; P:GO:0006508	G3DSA:2.40.10.10 (GENE3D); IPR001254 (PFAM); NON_CYTOPLASMIC_DOMAIN (PHOBIUS); SIGNAL_PEPTIDE_N_REGION (PHOBIUS); SIGNAL_PEPTIDE_C_REGION (PHOBIUS); SIGNAL_PEPTIDE (PHOBIUS); SIGNAL_PEPTIDE_H_REGION (PHOBIUS); SignalP-noTM (SIGNALP_EUK); SignalP-TM (SIGNALP_GRAM_POSITIVE); SignalP-noTM (SIGNALP_GRAM_NEGATIVE); IPR009003 (SUPERFAMILY)	Yes	No	No	-
965	Mcal_965	isotig00975	684	No	I	C:GO:0016021; P:GO:0006810; C:GO:0005622; F:GO:0005215	NON_CYTOPLASMIC_DOMAIN (PHOBIUS); SIGNAL_PEPTIDE_C_REGION (PHOBIUS); SIGNAL_PEPTIDE_N_REGION (PHOBIUS); SIGNAL_PEPTIDE (PHOBIUS); SIGNAL_PEPTIDE_H_REGION (PHOBIUS)	Yes	No	No	-
966	Mcal_966	isotig00993	677	No	I	F:GO:0004408; C:GO:0005739	IPR000511 (PFAM); IPR000511 (PANTHER); IPR000511 (PROSITE_PATTERNS); IPR000511 (PROSITE_PATTERNS)	Yes	No	No	map00860
967	Mcal_967	isotig01034	657	No	I	-	-	Yes	No	No	-
968	Mcal_968	isotig01042	648	No	I	-	CYTOPLASMIC_DOMAIN (PHOBIUS); TRANSMEMBRANE (PHOBIUS); NON_CYTOPLASMIC_DOMAIN (PHOBIUS); TMhelix (TMHMM)	Yes	No	No	-
969	Mcal_969	isotig01053	644	No	I	F:GO:0005515; F:GO:0005543	Coil (COILS); Coil (COILS); IPR001605 (PRINTS); IPR011993 (G3DSA:2.30.29.GENE3D); IPR002017 (PFAM); G3DSA:1.20.58.60 (GENE3D); PF15410 (PFAM); PTHR11915 (PANTHER); PTHR11915:SF248 (PANTHER); IPR001849 (PROSITE_PROFILES); SSF46966 (SUPERFAMILY); SSF50729 (SUPERFAMILY)	Yes	No	No	-
970	Mcal_970	isotig01058	639	No	I	-	-	No	No	No	-
971	Mcal_971	isotig01075	637	No	I	C:GO:0005622; P:GO:0006396; F:GO:0005515	Coil (COILS); IPR003107 (SMART); IPR011990 (G3DSA:1.25.40.GENE3D); IPR003107 (PFAM); PTHR11246:SF3 (PANTHER); PTHR11246 (PANTHER); SSF48452 (SUPERFAMILY)	Yes	Yes	Yes	-
972	Mcal_972	isotig01079	635	No	I	F:GO:0008353; P:GO:0006468; F:GO:0005524	IPR000719 (PFAM); G3DSA:1.10.510.10 (GENE3D); PTHR24054 (PANTHER); PTHR24054:SF28 (PANTHER); IPR011009 (SUPERFAMILY)	Yes	Yes	Yes	-
973	Mcal_973	isotig01094	623	No	I	F:GO:0003676; F:GO:0000166	-	Yes	Yes	No	-
974	Mcal_974	isotig01126	611	No	I	-	IPR009786 (PFAM); PTHR14315:SF3 (PANTHER); IPR009786 (PANTHER)	Yes	Yes	No	-
975	Mcal_975	isotig01165	593	No	I	C:GO:0005737; P:GO:0006085; P:GO:0008610; F:GO:0003987; C:GO:0005634	IPR000873 (PFAM); IPR025110 (PFAM); G3DSA:3.30.300.30 (GENE3D); G3DSA:2.30.38.10 (GENE3D); PTHR24095 (PANTHER); PTHR24095:SF126 (PANTHER); SSF56801 (SUPERFAMILY)	Yes	Yes	No	map00720 map00620 map00680 map00010 map00640
976	Mcal_976	isotig01181	587	No	I	F:GO:0008061; P:GO:0006030; C:GO:0005576	-	Yes	No	No	-
977	Mcal_977	isotig01191	585	No	I	-	IPR006649 (SMART); G3DSA:2.30.30.100 (GENE3D); IPR001163 (PFAM); PTHR23338:SF16 (PANTHER); IPR027141 (PANTHER); IPR010920 (SUPERFAMILY)	Yes	Yes	Yes	-
978	Mcal_978	isotig01202	578	No	I	-	-	No	No	No	-
979	Mcal_979	isotig01225	575	No	I	-	-	Yes	No	No	-
980	Mcal_980	isotig01233	568	No	I	C:GO:0000786; F:GO:0003677; P:GO:0006334; C:GO:0005634	IPR005819 (PRINTS); IPR005818 (SMART); IPR011991 (G3DSA:1.10.10.GENE3D); IPR005818 (PFAM); PTHR11467 (PANTHER); IPR005818 (PROSITE_PROFILES); SSF46785 (SUPERFAMILY)	Yes	No	No	-
981	Mcal_981	isotig01238	568	No	I	F:GO:0003723; P:GO:0006278; F:GO:0004519; F:GO:0003964	NON_CYTOPLASMIC_DOMAIN (PHOBIUS); SIGNAL_PEPTIDE_N_REGION (PHOBIUS); SIGNAL_PEPTIDE (PHOBIUS); SIGNAL_PEPTIDE_C_REGION (PHOBIUS); SIGNAL_PEPTIDE_H_REGION (PHOBIUS); SignalP-noTM (SIGNALP_EUK)	Yes	No	No	-
982	Mcal_982	isotig01245	563	No	I	C:GO:0016021; P:GO:0006811; F:GO:0005230	IPR006028 (PRINTS); IPR006029 (PFAM); IPR006202 (G3DSA:2.70.170.GENE3D); G3DSA:1.20.58.390 (GENE3D); IPR006201 (PANTHER); IPR015680 (PTHR18945:PANTHER); CYTOPLASMIC_DOMAIN (PHOBIUS); TRANSMEMBRANE (PHOBIUS); NON_CYTOPLASMIC_DOMAIN (PHOBIUS); TRANSMEMBRANE (PHOBIUS); NON_CYTOPLASMIC_DOMAIN (PHOBIUS); TRANSMEMBRANE (PHOBIUS); CYTOPLASMIC_DOMAIN (PHOBIUS); IPR006029 (SUPERFAMILY); TMhelix (TMHMM); T…	Yes	No	No	-
983	Mcal_983	isotig01288	545	No	I	-	-	No	No	No	-
984	Mcal_984	isotig01314	534	No	I	C:GO:0030016; C:GO:0032982; F:GO:0003774	Coil (COILS); IPR002928 (PFAM); PTHR13140:SF164 (PANTHER); PTHR13140 (PANTHER); SSF90257 (SUPERFAMILY)	Yes	No	No	-
985	Mcal_985	isotig01333	532	No	I	C:GO:0005737; C:GO:0015030; F:GO:0003676; C:GO:0046540; P:GO:0000398	NON_CYTOPLASMIC_DOMAIN (PHOBIUS); SIGNAL_PEPTIDE_C_REGION (PHOBIUS); SIGNAL_PEPTIDE_N_REGION (PHOBIUS); SIGNAL_PEPTIDE (PHOBIUS); SIGNAL_PEPTIDE_H_REGION (PHOBIUS)	Yes	Yes	No	-
986	Mcal_986	isotig01341	534	No	I	P:GO:0006564; P:GO:0006541; F:GO:0051287; F:GO:0008114; F:GO:0050661; P:GO:0009448; P:GO:0010468; F:GO:0005543; P:GO:0031175; P:GO:0019322; C:GO:0005737; F:GO:0046982; P:GO:0019530; P:GO:0009051; P:GO:0006544; P:GO:0021510; P:GO:0070314; F:GO:0004617; P:GO:0006566; F:GO:0004616; P:GO:0021915; P:GO:0021782; P:GO:0019521	PR00076 (PRINTS); IPR006114 (PFAM); IPR013328 (G3DSA:1.10.1040.GENE3D); IPR016040 (G3DSA:3.40.50.GENE3D); IPR006115 (PFAM); PTHR11811 (PANTHER); IPR006184 (PROSITE_PATTERNS); IPR008927 (SUPERFAMILY); SSF51735 (SUPERFAMILY)	Yes	No	Yes	map00030 map00030 map00680 map00480 map00480 map00260
987	Mcal_987	isotig01343	535	No	I	P:GO:0006457; P:GO:0006950; F:GO:0005524; F:GO:0051082	PS51257 (PROSITE_PROFILES)	Yes	No	Yes	-
988	Mcal_988	isotig01345	531	No	I	-	-	Yes	No	No	-
989	Mcal_989	isotig01347	532	No	I	-	-	No	No	No	-
990	Mcal_990	isotig01353	525	No	I	-	TMhelix (TMHMM)	No	No	No	-
991	Mcal_991	isotig01362	530	No	I	-	-	Yes	No	No	-
992	Mcal_992	isotig01367	525	No	I	P:GO:0008152; C:GO:0016020; F:GO:0016491	IPR016040 (G3DSA:3.40.50.GENE3D); IPR002198 (PFAM); PTHR24316 (PANTHER); PTHR24316:SF289 (PANTHER); TRANSMEMBRANE (PHOBIUS); CYTOPLASMIC_DOMAIN (PHOBIUS); NON_CYTOPLASMIC_DOMAIN (PHOBIUS); SSF51735 (SUPERFAMILY); TMhelix (TMHMM)	Yes	No	No	-
993	Mcal_993	isotig01369	525	No	I	F:GO:0080019	SIGNAL_PEPTIDE_C_REGION (PHOBIUS); SIGNAL_PEPTIDE_N_REGION (PHOBIUS); NON_CYTOPLASMIC_DOMAIN (PHOBIUS); SIGNAL_PEPTIDE (PHOBIUS); SIGNAL_PEPTIDE_H_REGION (PHOBIUS); SignalP-noTM (SIGNALP_EUK)	Yes	No	No	-
994	Mcal_994	isotig01374	523	No	I	F:GO:0016624; P:GO:0055114; F:GO:0016491; F:GO:0030976; P:GO:0008152; P:GO:0006099; F:GO:0004591	SIGNAL_PEPTIDE_N_REGION (PHOBIUS); SIGNAL_PEPTIDE_C_REGION (PHOBIUS); SIGNAL_PEPTIDE (PHOBIUS); SIGNAL_PEPTIDE_H_REGION (PHOBIUS); NON_CYTOPLASMIC_DOMAIN (PHOBIUS); SignalP-noTM (SIGNALP_EUK)	Yes	No	No	map00380 map00020 map00310
995	Mcal_995	isotig01376	525	No	I	-	-	Yes	No	No	-
996	Mcal_996	isotig01402	519	No	I	P:GO:0008152; F:GO:0003824; F:GO:0033961	IPR029058 (G3DSA:3.40.50.GENE3D); IPR010497 (PFAM); PTHR21661 (PANTHER); PTHR21661:SF10 (PANTHER); SIGNAL_PEPTIDE_C_REGION (PHOBIUS); SIGNAL_PEPTIDE_N_REGION (PHOBIUS); NON_CYTOPLASMIC_DOMAIN (PHOBIUS); SIGNAL_PEPTIDE_H_REGION (PHOBIUS); SIGNAL_PEPTIDE (PHOBIUS); SignalP-TM (SIGNALP_EUK); IPR029058 (SUPERFAMILY); TMhelix (TMHMM)	Yes	No	No	map00980
997	Mcal_997	isotig01409	518	No	I	-	-	No	No	No	-
998	Mcal_998	isotig01412	518	No	I	-	NON_CYTOPLASMIC_DOMAIN (PHOBIUS); CYTOPLASMIC_DOMAIN (PHOBIUS); TRANSMEMBRANE (PHOBIUS); TMhelix (TMHMM)	No	No	No	-
999	Mcal_999	isotig01417	514	No	I	-	-	No	No	No	-
1000	Mcal_1000	isotig01418	515	No	I	F:GO:0046983	CYTOPLASMIC_DOMAIN (PHOBIUS); TRANSMEMBRANE (PHOBIUS); TRANSMEMBRANE (PHOBIUS); NON_CYTOPLASMIC_DOMAIN (PHOBIUS); NON_CYTOPLASMIC_DOMAIN (PHOBIUS); TMhelix (TMHMM); TMhelix (TMHMM)	Yes	No	No	-
1001	Mcal_1001	isotig01445	508	No	I	-	-	Yes	No	No	-
1002	Mcal_1002	isotig01453	507	No	I	F:GO:0004803; P:GO:0015074; P:GO:0006313; F:GO:0003677	-	Yes	No	No	-
1003	Mcal_1003	isotig01456	506	No	I	-	-	Yes	No	No	-
1004	Mcal_1004	isotig01459	506	No	I	C:GO:0043231; C:GO:0016020; P:GO:0055114; F:GO:0050660; F:GO:0050661; F:GO:0004499	IPR020946 (PFAM); G3DSA:3.50.50.60 (GENE3D); PTHR23023:SF40 (PANTHER); PTHR23023 (PANTHER); SSF51905 (SUPERFAMILY)	Yes	No	No	map00982
1005	Mcal_1005	isotig01480	501	No	I	C:GO:0005875; P:GO:0006457; P:GO:0022008; F:GO:0042623; C:GO:0005832; P:GO:0031122; P:GO:0007052; F:GO:0005524; F:GO:0051082	IPR002423 (PFAM); IPR027409 (G3DSA:3.50.7.GENE3D); IPR002423 (PANTHER); IPR012720 (PTHR11353:PANTHER); IPR027409 (SUPERFAMILY)	Yes	Yes	Yes	-
1006	Mcal_1006	isotig01484	502	No	I	-	-	No	No	No	-
1007	Mcal_1007	isotig01493	499	No	I	C:GO:0016020	IPR001727 (PFAM); IPR001727 (PANTHER); CYTOPLASMIC_DOMAIN (PHOBIUS); NON_CYTOPLASMIC_DOMAIN (PHOBIUS); NON_CYTOPLASMIC_DOMAIN (PHOBIUS); TRANSMEMBRANE (PHOBIUS); CYTOPLASMIC_DOMAIN (PHOBIUS); TRANSMEMBRANE (PHOBIUS); TRANSMEMBRANE (PHOBIUS); SignalP-TM (SIGNALP_EUK); TMhelix (TMHMM); TMhelix (TMHMM); TMhelix (TMHMM)	Yes	No	No	-
1008	Mcal_1008	isotig01506	498	No	I	P:GO:0007498; P:GO:0006468; C:GO:0030018; F:GO:0008307; P:GO:0045214; P:GO:0008586; F:GO:0000166; F:GO:0005200; F:GO:0004687; F:GO:0005515	IPR003599 (SMART); IPR003598 (SMART); IPR013098 (PFAM); IPR013783 (G3DSA:2.60.40.GENE3D); PTHR19897 (PANTHER); IPR007110 (PROSITE_PROFILES); SSF48726 (SUPERFAMILY)	Yes	No	No	-
1009	Mcal_1009	isotig01507	497	No	I	F:GO:0005525; F:GO:0003924; P:GO:0006184	CYTOPLASMIC_DOMAIN (PHOBIUS); TRANSMEMBRANE (PHOBIUS); TRANSMEMBRANE (PHOBIUS); TRANSMEMBRANE (PHOBIUS); CYTOPLASMIC_DOMAIN (PHOBIUS); NON_CYTOPLASMIC_DOMAIN (PHOBIUS); NON_CYTOPLASMIC_DOMAIN (PHOBIUS); TMhelix (TMHMM); TMhelix (TMHMM)	Yes	No	No	-
1010	Mcal_1010	isotig01511	487	No	I	F:GO:0016417; P:GO:0006631; F:GO:0016297; P:GO:0071353; C:GO:0005739; P:GO:0009058; F:GO:0016491; F:GO:0019171; C:GO:0042587; C:GO:0005794; C:GO:0005886	IPR016040 (G3DSA:3.40.50.GENE3D); IPR013968 (PFAM); PTHR11712 (PANTHER); PTHR11712:SF227 (PANTHER); SSF51735 (SUPERFAMILY)	Yes	No	No	map00780 map00061 map00061
1011	Mcal_1011	isotig01528	493	No	I	F:GO:0046872; F:GO:0008233	IPR000859 (SMART); IPR000859 (G3DSA:2.60.120.GENE3D); IPR000859 (PFAM); PTHR10127 (PANTHER); IPR000859 (PROSITE_PROFILES); IPR000859 (SUPERFAMILY)	Yes	No	No	-
1012	Mcal_1012	isotig01532	491	No	I	-	-	Yes	No	No	-
1013	Mcal_1013	isotig01536	492	No	I	-	-	No	No	No	-
1014	Mcal_1014	isotig01567	486	No	I	-	TRANSMEMBRANE (PHOBIUS); CYTOPLASMIC_DOMAIN (PHOBIUS); NON_CYTOPLASMIC_DOMAIN (PHOBIUS); TMhelix (TMHMM)	Yes	No	No	-
1015	Mcal_1015	isotig01589	481	No	I	P:GO:0015991; C:GO:0033179; F:GO:0015078; C:GO:0016021	IPR000245 (PRINTS); IPR011555 (TIGRFAM); IPR002379 (PFAM); G3DSA:1.20.120.610 (GENE3D); PTHR10263 (PANTHER); PTHR10263:SF2 (PANTHER); TRANSMEMBRANE (PHOBIUS); TRANSMEMBRANE (PHOBIUS); NON_CYTOPLASMIC_DOMAIN (PHOBIUS); CYTOPLASMIC_DOMAIN (PHOBIUS); CYTOPLASMIC_DOMAIN (PHOBIUS); TRANSMEMBRANE (PHOBIUS); NON_CYTOPLASMIC_DOMAIN (PHOBIUS); IPR002379 (SUPERFAMILY); IPR002379 (SUPERFAMILY); TMhelix (TMH…	Yes	Yes	Yes	-
1016	Mcal_1016	isotig01596	479	No	I	-	-	No	No	No	-
1017	Mcal_1017	isotig01601	480	No	I	P:GO:0045292; F:GO:0000339; P:GO:0051028; C:GO:0005846	IPR015174 (PFAM); IPR016021 (G3DSA:1.25.40.GENE3D); IPR027159 (PANTHER); IPR016024 (SUPERFAMILY)	Yes	No	No	-
1018	Mcal_1018	isotig01606	479	No	I	F:GO:0003676; F:GO:0000166	IPR000504 (SMART); IPR012677 (G3DSA:3.30.70.GENE3D); IPR000504 (PFAM); PTHR10548:SF10 (PANTHER); PTHR10548 (PANTHER); IPR000504 (PROSITE_PROFILES); SSF54928 (SUPERFAMILY)	Yes	Yes	Yes	-
1019	Mcal_1019	isotig01656	473	No	I	-	-	No	No	No	-
1020	Mcal_1020	isotig01662	470	No	I	C:GO:0005737; C:GO:0019773; P:GO:0006511; C:GO:0005634; F:GO:0004298	-	Yes	Yes	Yes	-
1021	Mcal_1021	isotig01671	471	No	I	-	-	Yes	No	No	-
1022	Mcal_1022	isotig01676	470	No	I	-	-	No	No	No	-
1023	Mcal_1023	isotig01678	465	No	I	-	-	Yes	No	No	-
1024	Mcal_1024	isotig01681	470	No	I	P:GO:0007165; C:GO:0005622	-	Yes	No	No	-
1025	Mcal_1025	isotig01701	465	No	I	C:GO:0005856	IPR001303 (G3DSA:3.40.225.GENE3D); IPR001303 (PFAM); PTHR10672 (PANTHER); IPR027774 (PTHR10672:PANTHER); IPR001303 (SUPERFAMILY)	Yes	No	No	-
1026	Mcal_1026	isotig01702	461	No	I	-	-	No	No	No	-
1027	Mcal_1027	isotig01715	465	No	I	C:GO:0005737; F:GO:0008898; P:GO:0009086; F:GO:0047150; P:GO:0032259; F:GO:0008270	IPR003726 (PFAM); IPR003726 (G3DSA:3.20.20.GENE3D); PTHR21091:SF94 (PANTHER); PTHR21091 (PANTHER); IPR003726 (SUPERFAMILY)	Yes	No	No	map00270 map00270 map00260
1028	Mcal_1028	isotig01739	459	No	I	C:GO:0016021; P:GO:0006810; C:GO:0005622; F:GO:0005215	IPR001251 (PFAM); IPR001251 (G3DSA:3.40.525.GENE3D); PTHR23324:SF50 (PANTHER); PTHR23324 (PANTHER); IPR001251 (SUPERFAMILY); IPR011074 (SUPERFAMILY)	Yes	No	No	-
1029	Mcal_1029	isotig01740	461	No	I	-	TRANSMEMBRANE (PHOBIUS); NON_CYTOPLASMIC_DOMAIN (PHOBIUS); CYTOPLASMIC_DOMAIN (PHOBIUS)	No	No	No	-
1030	Mcal_1030	isotig01754	459	No	I	-	-	No	No	No	-
1031	Mcal_1031	isotig01765	459	No	I	C:GO:0000502	IPR007834 (PFAM); IPR007834 (PANTHER); PTHR16771:SF0 (PANTHER)	Yes	No	No	-
1032	Mcal_1032	isotig01775	457	No	I	-	-	Yes	No	No	-
1033	Mcal_1033	isotig01777	455	No	I	-	NON_CYTOPLASMIC_DOMAIN (PHOBIUS); TRANSMEMBRANE (PHOBIUS); CYTOPLASMIC_DOMAIN (PHOBIUS); TMhelix (TMHMM)	No	No	No	-
1034	Mcal_1034	isotig01781	454	No	I	-	-	Yes	Yes	Yes	-
1035	Mcal_1035	isotig01782	456	No	I	F:GO:0005525; P:GO:0007264	IPR001623 (PRINTS); IPR001623 (SMART); IPR001623 (G3DSA:1.10.287.GENE3D); IPR001623 (PFAM); IPR001806 (PFAM); IPR027417 (G3DSA:3.40.50.GENE3D); PTHR24073:SF269 (PANTHER); PTHR24073 (PANTHER); IPR001623 (PROSITE_PROFILES); IPR027417 (SUPERFAMILY); IPR001623 (SUPERFAMILY)	Yes	Yes	Yes	-
1036	Mcal_1036	isotig01791	457	No	I	F:GO:0004803; P:GO:0015074; P:GO:0006313; F:GO:0003677	-	Yes	No	No	-
1037	Mcal_1037	isotig01794	453	No	I	-	-	Yes	No	No	-
1038	Mcal_1038	isotig01800	452	No	I	F:GO:0016779	G3DSA:3.40.220.10 (GENE3D); IPR002589 (PFAM); PTHR11106 (PANTHER); PTHR11106:SF59 (PANTHER); IPR002589 (PROSITE_PROFILES); SSF52949 (SUPERFAMILY)	Yes	No	No	-
1039	Mcal_1039	isotig01821	451	No	I	-	-	No	No	No	-
1040	Mcal_1040	isotig01823	452	No	I	-	CYTOPLASMIC_DOMAIN (PHOBIUS); TRANSMEMBRANE (PHOBIUS); NON_CYTOPLASMIC_DOMAIN (PHOBIUS); TMhelix (TMHMM)	No	No	No	-
1041	Mcal_1041	isotig01824	449	No	I	-	-	No	No	No	-
1042	Mcal_1042	isotig01828	452	No	I	-	-	No	No	No	-
1043	Mcal_1043	isotig01834	450	No	I	-	-	Yes	Yes	No	-
1044	Mcal_1044	isotig01835	450	No	I	P:GO:0030855; F:GO:0047035; P:GO:0042572; F:GO:0004745; P:GO:0042904; P:GO:0008209; F:GO:0016491; F:GO:0016854; F:GO:0004022; P:GO:0042448; C:GO:0030176; P:GO:0002138; P:GO:0055114; P:GO:0008152	-	Yes	No	No	map00982 map00980 map00626 map00625 map00010 map00071 map00260 map00350 map00830 map00830 map00140
1045	Mcal_1045	isotig01836	448	No	I	-	CYTOPLASMIC_DOMAIN (PHOBIUS); TRANSMEMBRANE (PHOBIUS); NON_CYTOPLASMIC_DOMAIN (PHOBIUS); TRANSMEMBRANE (PHOBIUS); CYTOPLASMIC_DOMAIN (PHOBIUS)	No	No	No	-
1046	Mcal_1046	isotig01844	448	No	I	-	-	No	No	No	-
1047	Mcal_1047	isotig01845	448	No	I	-	SIGNAL_PEPTIDE_C_REGION (PHOBIUS); NON_CYTOPLASMIC_DOMAIN (PHOBIUS); SIGNAL_PEPTIDE_N_REGION (PHOBIUS); SIGNAL_PEPTIDE (PHOBIUS); SIGNAL_PEPTIDE_H_REGION (PHOBIUS); SignalP-noTM (SIGNALP_EUK)	Yes	No	No	-
1048	Mcal_1048	isotig01852	447	No	I	-	-	Yes	No	No	-
1049	Mcal_1049	isotig01858	445	No	I	P:GO:0051239; P:GO:0048519; P:GO:0042742; F:GO:0042834	-	Yes	No	No	-
1050	Mcal_1050	isotig01859	446	No	I	-	IPR023379 (G3DSA:1.20.1520.GENE3D); IPR023379 (PFAM); PTHR21532 (PANTHER); PTHR21532:SF0 (PANTHER)	Yes	No	No	-
1051	Mcal_1051	isotig01861	447	No	I	-	-	No	No	No	-
1052	Mcal_1052	isotig01866	446	No	I	F:GO:0016747	PTHR11161 (PANTHER); NON_CYTOPLASMIC_DOMAIN (PHOBIUS); CYTOPLASMIC_DOMAIN (PHOBIUS); TRANSMEMBRANE (PHOBIUS); CYTOPLASMIC_DOMAIN (PHOBIUS); TRANSMEMBRANE (PHOBIUS); TMhelix (TMHMM); TMhelix (TMHMM)	Yes	No	No	-
1053	Mcal_1053	isotig01870	443	No	I	F:GO:0008236; C:GO:0044424; P:GO:0006508	IPR029058 (G3DSA:3.40.50.GENE3D); IPR001375 (PFAM); PTHR11731 (PANTHER); PTHR11731:SF108 (PANTHER); IPR029058 (SUPERFAMILY)	Yes	No	No	-
1054	Mcal_1054	isotig01885	445	No	I	-	IPR023379 (G3DSA:1.20.1520.GENE3D); IPR023379 (PFAM); PTHR21532 (PANTHER); PTHR21532:SF0 (PANTHER)	Yes	No	No	-
1055	Mcal_1055	isotig01886	442	No	I	C:GO:0030130; P:GO:0016192; P:GO:0006886; F:GO:0005198; C:GO:0030132	Coil (COILS); Coil (COILS); IPR000996 (PFAM); IPR000996 (PANTHER)	Yes	No	No	-
1056	Mcal_1056	isotig01894	442	No	I	F:GO:0003723	TRANSMEMBRANE (PHOBIUS); CYTOPLASMIC_DOMAIN (PHOBIUS); NON_CYTOPLASMIC_DOMAIN (PHOBIUS)	Yes	No	No	-
1057	Mcal_1057	isotig01896	442	No	I	P:GO:0006508; F:GO:0004222	IPR008753 (PFAM); IPR000718 (PANTHER); CYTOPLASMIC_DOMAIN (PHOBIUS); TRANSMEMBRANE (PHOBIUS); NON_CYTOPLASMIC_DOMAIN (PHOBIUS); SSF55486 (SUPERFAMILY); TMhelix (TMHMM)	Yes	No	No	-
1058	Mcal_1058	isotig01901	442	No	I	-	-	No	No	No	-
1059	Mcal_1059	isotig01906	437	No	I	F:GO:0022857; C:GO:0016021; P:GO:0055085	G3DSA:1.20.1250.20 (GENE3D); PTHR24064:SF202 (PANTHER); PTHR24064 (PANTHER); CYTOPLASMIC_DOMAIN (PHOBIUS); TRANSMEMBRANE (PHOBIUS); CYTOPLASMIC_DOMAIN (PHOBIUS); NON_CYTOPLASMIC_DOMAIN (PHOBIUS); TRANSMEMBRANE (PHOBIUS); NON_CYTOPLASMIC_DOMAIN (PHOBIUS); TRANSMEMBRANE (PHOBIUS); PS51257 (PROSITE_PROFILES); IPR016196 (SUPERFAMILY); TMhelix (TMHMM); TMhelix (TMHMM); TMhelix (TMHMM)	Yes	No	No	-
1060	Mcal_1060	isotig01907	440	No	I	-	-	No	No	No	-
1061	Mcal_1061	isotig01912	442	No	I	F:GO:0008168; F:GO:0016740; P:GO:0032259	IPR006616 (SMART); IPR024518 (PFAM); PTHR31649 (PANTHER)	Yes	No	No	-
1062	Mcal_1062	isotig01913	440	No	I	F:GO:0004222; C:GO:0005759; P:GO:0006508; F:GO:0046872	IPR011237 (G3DSA:3.30.830.GENE3D); PTHR11851:SF68 (PANTHER); PTHR11851 (PANTHER); IPR011249 (SUPERFAMILY)	Yes	No	No	-
1063	Mcal_1063	isotig01914	437	No	I	P:GO:0007049; F:GO:0005525	IPR027417 (G3DSA:3.40.50.GENE3D); IPR000038 (PFAM); IPR000038 (PANTHER); PTHR18884:SF53 (PANTHER); IPR027417 (SUPERFAMILY)	Yes	No	No	-
1064	Mcal_1064	isotig01921	440	No	I	-	-	Yes	No	No	-
1065	Mcal_1065	isotig01927	437	No	I	-	NON_CYTOPLASMIC_DOMAIN (PHOBIUS); TRANSMEMBRANE (PHOBIUS); CYTOPLASMIC_DOMAIN (PHOBIUS); TMhelix (TMHMM)	No	No	No	-
1066	Mcal_1066	isotig01928	440	No	I	P:GO:0046907	Coil (COILS); Coil (COILS)	Yes	No	No	-
1067	Mcal_1067	isotig01933	437	No	I	-	CYTOPLASMIC_DOMAIN (PHOBIUS); TRANSMEMBRANE (PHOBIUS); NON_CYTOPLASMIC_DOMAIN (PHOBIUS); TMhelix (TMHMM)	No	No	No	-
1068	Mcal_1068	isotig01934	439	No	I	-	IPR029058 (G3DSA:3.40.50.GENE3D); PTHR21661:SF10 (PANTHER); PTHR21661 (PANTHER); IPR029058 (SUPERFAMILY)	Yes	No	No	-
1069	Mcal_1069	isotig01950	439	No	I	-	-	No	No	No	-
1070	Mcal_1070	isotig01954	435	No	I	-	CYTOPLASMIC_DOMAIN (PHOBIUS); NON_CYTOPLASMIC_DOMAIN (PHOBIUS); TRANSMEMBRANE (PHOBIUS); TMhelix (TMHMM)	No	No	No	-
1071	Mcal_1071	isotig01965	436	No	I	F:GO:0005525; P:GO:0007264; F:GO:0000166	-	Yes	No	No	-
1072	Mcal_1072	isotig01975	434	No	I	-	-	No	No	No	-
1073	Mcal_1073	isotig01981	436	No	I	P:GO:0031167; F:GO:0000179	IPR020598 (SMART); IPR029063 (G3DSA:3.40.50.GENE3D); IPR001737 (PFAM); PTHR11727:SF7 (PANTHER); IPR001737 (PANTHER); IPR020596 (PROSITE_PATTERNS); IPR029063 (SUPERFAMILY)	Yes	No	Yes	-
1074	Mcal_1074	isotig01989	434	No	I	-	NON_CYTOPLASMIC_DOMAIN (PHOBIUS); CYTOPLASMIC_DOMAIN (PHOBIUS); TRANSMEMBRANE (PHOBIUS); CYTOPLASMIC_DOMAIN (PHOBIUS); TRANSMEMBRANE (PHOBIUS); TMhelix (TMHMM); TMhelix (TMHMM)	No	No	No	-
1075	Mcal_1075	isotig01992	433	No	I	P:GO:0006915; P:GO:0006508; F:GO:0004197	IPR015917 (PRINTS); IPR015917 (SMART); IPR011600 (PFAM); IPR029030 (G3DSA:3.40.50.GENE3D); PTHR10454 (PANTHER); IPR016129 (PROSITE_PATTERNS); IPR016129 (PROSITE_PATTERNS); IPR001309 (PROSITE_PROFILES); SSF52129 (SUPERFAMILY)	Yes	Yes	No	-
1076	Mcal_1076	isotig01994	428	No	I	-	-	Yes	No	No	-
1077	Mcal_1077	isotig01996	429	No	I	-	-	No	No	No	-
1078	Mcal_1078	isotig01997	429	No	I	P:GO:0055114; P:GO:0045454; F:GO:0016491; F:GO:0050660	-	Yes	No	No	-
1079	Mcal_1079	isotig02000	430	No	I	-	-	Yes	No	No	-
1080	Mcal_1080	isotig02008	431	No	I	-	-	No	No	No	-
1081	Mcal_1081	isotig02011	430	No	I	F:GO:0003676; F:GO:0005524; F:GO:0008026	-	Yes	Yes	Yes	-
1082	Mcal_1082	isotig02012	429	No	I	P:GO:0006979; P:GO:0055114; F:GO:0004601; F:GO:0020037	IPR002007 (G3DSA:1.10.640.GENE3D); IPR002007 (PFAM); PTHR11475 (PANTHER); PTHR11475:SF4 (PANTHER); IPR002007 (PROSITE_PROFILES); IPR010255 (SUPERFAMILY)	Yes	No	No	map00360 map00940
1083	Mcal_1083	isotig02014	430	No	I	P:GO:0006814; P:GO:0055085; C:GO:0016020; F:GO:0005215	IPR001898 (PFAM); PTHR10283 (PANTHER); PTHR10283:SF82 (PANTHER); CYTOPLASMIC_DOMAIN (PHOBIUS); TRANSMEMBRANE (PHOBIUS); CYTOPLASMIC_DOMAIN (PHOBIUS); TRANSMEMBRANE (PHOBIUS); TRANSMEMBRANE (PHOBIUS); NON_CYTOPLASMIC_DOMAIN (PHOBIUS); NON_CYTOPLASMIC_DOMAIN (PHOBIUS); TMhelix (TMHMM); TMhelix (TMHMM)	Yes	No	No	-
1084	Mcal_1084	isotig02018	428	No	I	P:GO:0055114; F:GO:0016491; F:GO:0008131; P:GO:0042402	-	Yes	No	No	map00410 map00960 map00950 map00360 map00260 map00350
1085	Mcal_1085	isotig02027	428	No	I	-	-	Yes	No	No	-
1086	Mcal_1086	isotig02028	428	No	I	-	TRANSMEMBRANE (PHOBIUS); CYTOPLASMIC_DOMAIN (PHOBIUS); NON_CYTOPLASMIC_DOMAIN (PHOBIUS); TMhelix (TMHMM)	Yes	No	No	-
1087	Mcal_1087	isotig02038	427	No	I	F:GO:0005515	IPR013783 (G3DSA:2.60.40.GENE3D); IPR013098 (PFAM); IPR013783 (G3DSA:2.60.40.GENE3D); PTHR19897 (PANTHER); PTHR19897:SF142 (PANTHER); IPR007110 (PROSITE_PROFILES); SSF48726 (SUPERFAMILY); IPR003961 (SUPERFAMILY)	Yes	No	No	-
1088	Mcal_1088	isotig02045	427	No	I	-	-	No	No	No	-
1089	Mcal_1089	isotig02053	423	No	I	F:GO:0003676; F:GO:0000166	IPR000504 (SMART); IPR000504 (PFAM); IPR012677 (G3DSA:3.30.70.GENE3D); PTHR15683 (PANTHER); IPR000504 (PROSITE_PROFILES); SSF54928 (SUPERFAMILY)	Yes	Yes	Yes	-
1090	Mcal_1090	isotig02057	425	No	I	F:GO:0003676; F:GO:0016788	IPR016071 (PFAM); IPR016071 (G3DSA:2.40.50.GENE3D); PTHR12302 (PANTHER); PTHR12302:SF2 (PANTHER); IPR016071 (SUPERFAMILY)	Yes	No	No	-
1091	Mcal_1091	isotig02060	423	No	I	P:GO:0048593; F:GO:0016620; P:GO:0048384; P:GO:0022011; P:GO:0060325; P:GO:0048318; P:GO:0042572; P:GO:0031101; P:GO:0048339; P:GO:0033339; P:GO:0048703; P:GO:0007368; P:GO:0061131; P:GO:0009952; P:GO:0048546; P:GO:0055114; P:GO:0001889; P:GO:0042573; P:GO:0039023; P:GO:0022010	-	Yes	No	No	-
1092	Mcal_1092	isotig02063	422	No	I	F:GO:0046872	PTHR15491 (PANTHER); IPR026811 (PTHR15491:PANTHER); IPR007087 (PROSITE_PATTERNS)	Yes	No	No	-
1093	Mcal_1093	isotig02064	425	No	I	-	-	No	No	No	-
1094	Mcal_1094	isotig02067	423	No	I	-	-	Yes	No	No	-
1095	Mcal_1095	isotig02074	423	No	I	-	-	No	No	No	-
1096	Mcal_1096	isotig02086	419	No	I	-	-	No	No	No	-
1097	Mcal_1097	isotig02087	420	No	I	-	-	No	No	No	-
1098	Mcal_1098	isotig02088	422	No	I	F:GO:0051287; P:GO:0006099; F:GO:0004449; F:GO:0000287	IPR024084 (G3DSA:3.40.718.GENE3D); IPR024084 (PFAM); PTHR11835:SF42 (PANTHER); IPR001804 (PANTHER); IPR019818 (PROSITE_PATTERNS); SSF53659 (SUPERFAMILY)	Yes	Yes	Yes	map00020
1099	Mcal_1099	isotig02090	422	No	I	P:GO:0007165	IPR011022 (SMART); IPR014752 (G3DSA:2.60.40.GENE3D); IPR011022 (PFAM); PTHR11188:SF43 (PANTHER); PTHR11188 (PANTHER); IPR014756 (SUPERFAMILY)	Yes	No	No	-
1100	Mcal_1100	isotig02091	419	No	I	P:GO:0060158; F:GO:0004871; C:GO:0005834; P:GO:0006184; F:GO:0031683; F:GO:0003924; F:GO:0001664; P:GO:0007188; F:GO:0005525	IPR000654 (PRINTS); IPR001019 (SMART); IPR027417 (G3DSA:3.40.50.GENE3D); IPR001019 (PFAM); IPR001019 (PANTHER); PTHR10218:SF195 (PANTHER); IPR027417 (SUPERFAMILY)	Yes	No	No	-
1101	Mcal_1101	isotig02092	420	No	I	F:GO:0005212; P:GO:0006950; C:GO:0005840	-	Yes	No	No	-
1102	Mcal_1102	isotig02094	417	No	I	P:GO:0006886	-	Yes	Yes	No	-
1103	Mcal_1103	isotig02100	416	No	I	C:GO:0005777; P:GO:0055114; F:GO:0003997; P:GO:0006635; F:GO:0016627; F:GO:0050660; P:GO:0006631	-	Yes	No	No	map00592 map01040 map00071
1104	Mcal_1104	isotig02115	419	No	I	-	CYTOPLASMIC_DOMAIN (PHOBIUS); TRANSMEMBRANE (PHOBIUS); CYTOPLASMIC_DOMAIN (PHOBIUS); NON_CYTOPLASMIC_DOMAIN (PHOBIUS); TRANSMEMBRANE (PHOBIUS); TMhelix (TMHMM)	Yes	No	No	-
1105	Mcal_1105	isotig02117	419	No	I	-	-	No	No	No	-
1106	Mcal_1106	isotig02124	417	No	I	-	-	No	No	No	-
1107	Mcal_1107	isotig02129	418	No	I	-	-	Yes	No	No	-
1108	Mcal_1108	isotig02131	417	No	I	-	TRANSMEMBRANE (PHOBIUS); CYTOPLASMIC_DOMAIN (PHOBIUS); NON_CYTOPLASMIC_DOMAIN (PHOBIUS); TMhelix (TMHMM)	No	No	No	-
1109	Mcal_1109	isotig02132	411	No	I	-	IPR014766 (G3DSA:2.60.40.GENE3D)	No	No	No	-
1110	Mcal_1110	isotig02134	413	No	I	-	-	No	No	No	-
1111	Mcal_1111	isotig02136	415	No	I	-	NON_CYTOPLASMIC_DOMAIN (PHOBIUS); SIGNAL_PEPTIDE_N_REGION (PHOBIUS); SIGNAL_PEPTIDE_C_REGION (PHOBIUS); SIGNAL_PEPTIDE_H_REGION (PHOBIUS); SIGNAL_PEPTIDE (PHOBIUS); SignalP-TM (SIGNALP_EUK); TMhelix (TMHMM)	Yes	No	No	-
1112	Mcal_1112	isotig02139	415	No	I	P:GO:0080090; P:GO:0051726; C:GO:0016591; P:GO:0031323; P:GO:0060255; F:GO:0005515	CYTOPLASMIC_DOMAIN (PHOBIUS); TRANSMEMBRANE (PHOBIUS); NON_CYTOPLASMIC_DOMAIN (PHOBIUS); TMhelix (TMHMM)	Yes	Yes	No	-
1113	Mcal_1113	isotig02144	413	No	I	F:GO:0046872	IPR007087 (PROSITE_PATTERNS)	Yes	No	No	-
1114	Mcal_1114	isotig02145	416	No	I	-	SIGNAL_PEPTIDE_N_REGION (PHOBIUS); SIGNAL_PEPTIDE (PHOBIUS); NON_CYTOPLASMIC_DOMAIN (PHOBIUS); SIGNAL_PEPTIDE_C_REGION (PHOBIUS); SIGNAL_PEPTIDE_H_REGION (PHOBIUS); SignalP-noTM (SIGNALP_EUK); TMhelix (TMHMM)	No	No	No	-
1115	Mcal_1115	isotig02154	413	No	I	-	-	Yes	Yes	No	-
1116	Mcal_1116	isotig02159	408	No	I	-	-	No	No	No	-
1117	Mcal_1117	isotig02160	408	No	I	-	-	No	No	No	-
1118	Mcal_1118	isotig02161	412	No	I	-	-	No	No	No	-
1119	Mcal_1119	isotig02169	412	No	I	-	SIGNAL_PEPTIDE_H_REGION (PHOBIUS); NON_CYTOPLASMIC_DOMAIN (PHOBIUS); SIGNAL_PEPTIDE (PHOBIUS); SIGNAL_PEPTIDE_N_REGION (PHOBIUS); SIGNAL_PEPTIDE_C_REGION (PHOBIUS); SignalP-noTM (SIGNALP_EUK)	Yes	No	No	-
1120	Mcal_1120	isotig02174	413	No	I	F:GO:0003676; F:GO:0000166	NON_CYTOPLASMIC_DOMAIN (PHOBIUS); CYTOPLASMIC_DOMAIN (PHOBIUS); TRANSMEMBRANE (PHOBIUS); SignalP-TM (SIGNALP_GRAM_POSITIVE)	Yes	No	No	-
1121	Mcal_1121	isotig02176	410	No	I	P:GO:0043066; P:GO:0006281	IPR029448 (PFAM)	Yes	No	No	-
1122	Mcal_1122	isotig02196	409	No	I	-	-	No	No	No	-
1123	Mcal_1123	isotig02197	405	No	I	P:GO:0015991; C:GO:0033179; F:GO:0016787; F:GO:0015078	IPR002843 (PFAM); IPR016727 (PANTHER); IPR002843 (SUPERFAMILY)	Yes	No	Yes	-
1124	Mcal_1124	isotig02199	406	No	I	-	-	Yes	No	No	-
1125	Mcal_1125	isotig02204	408	No	I	C:GO:0005622	-	Yes	Yes	No	-
1126	Mcal_1126	isotig02209	407	No	I	C:GO:0016020; P:GO:0007155	IPR002159 (PRINTS); IPR002159 (PFAM); IPR002159 (PANTHER)	Yes	Yes	No	-
1127	Mcal_1127	isotig02210	407	No	I	-	-	No	No	No	-
1128	Mcal_1128	isotig02213	404	No	I	-	TMhelix (TMHMM)	Yes	No	No	-
1129	Mcal_1129	isotig02215	406	No	I	C:GO:0016021	IPR002995 (PFAM); PTHR23427:SF1 (PANTHER); PTHR23427 (PANTHER); NON_CYTOPLASMIC_DOMAIN (PHOBIUS); TRANSMEMBRANE (PHOBIUS); CYTOPLASMIC_DOMAIN (PHOBIUS); TMhelix (TMHMM)	Yes	No	No	-
1130	Mcal_1130	isotig02219	406	No	I	-	-	No	No	No	-
1131	Mcal_1131	isotig02232	404	No	I	C:GO:0000786; F:GO:0003677; P:GO:0006334; C:GO:0005634; F:GO:0046982	IPR000558 (PRINTS); IPR000558 (SMART); IPR007125 (PFAM); IPR009072 (G3DSA:1.10.20.GENE3D); IPR000558 (PANTHER); IPR000558 (PROSITE_PATTERNS); IPR009072 (SUPERFAMILY)	Yes	No	No	-
1132	Mcal_1132	isotig02235	403	No	I	-	-	Yes	No	No	-
1133	Mcal_1133	isotig02244	403	No	I	F:GO:0005515	PTHR16461:SF5 (PANTHER); PTHR16461 (PANTHER); IPR000008 (SUPERFAMILY)	Yes	No	No	-
1134	Mcal_1134	isotig02245	402	No	I	P:GO:0008152; F:GO:0003824	SIGNAL_PEPTIDE_N_REGION (PHOBIUS); SIGNAL_PEPTIDE_C_REGION (PHOBIUS); NON_CYTOPLASMIC_DOMAIN (PHOBIUS); SIGNAL_PEPTIDE (PHOBIUS); SIGNAL_PEPTIDE_H_REGION (PHOBIUS); SignalP-noTM (SIGNALP_EUK)	Yes	No	No	-
1135	Mcal_1135	isotig02248	403	No	I	F:GO:0042302	IPR000618 (PFAM); PTHR10380:SF116 (PANTHER); PTHR10380 (PANTHER); SIGNAL_PEPTIDE_C_REGION (PHOBIUS); NON_CYTOPLASMIC_DOMAIN (PHOBIUS); SIGNAL_PEPTIDE (PHOBIUS); SIGNAL_PEPTIDE_N_REGION (PHOBIUS); SIGNAL_PEPTIDE_H_REGION (PHOBIUS); IPR000618 (PROSITE_PROFILES); SignalP-noTM (SIGNALP_EUK); SignalP-noTM (SIGNALP_GRAM_NEGATIVE)	Yes	No	No	-
1136	Mcal_1136	isotig02251	403	No	I	-	PTHR23022 (PANTHER)	Yes	No	No	-
1137	Mcal_1137	isotig02263	402	No	I	P:GO:0015031	Coil (COILS); IPR005024 (PFAM); PTHR22761:SF4 (PANTHER); PTHR22761 (PANTHER)	Yes	No	No	-
1138	Mcal_1138	isotig02279	399	No	I	P:GO:0055114; F:GO:0016491	IPR002198 (PRINTS); IPR002347 (PRINTS); IPR016040 (G3DSA:3.40.50.GENE3D); PF13561 (PFAM); PTHR24312 (PANTHER); PTHR24312:SF0 (PANTHER); IPR020904 (PROSITE_PATTERNS); SSF51735 (SUPERFAMILY)	Yes	Yes	No	-
1139	Mcal_1139	isotig02281	398	No	I	-	-	Yes	No	No	-
1140	Mcal_1140	isotig02286	399	No	I	-	-	No	No	No	-
1141	Mcal_1141	isotig02289	400	No	I	-	PTHR10962 (PANTHER); PTHR10962:SF1 (PANTHER)	Yes	No	No	-
1142	Mcal_1142	isotig02301	397	No	I	-	-	Yes	No	No	-
1143	Mcal_1143	isotig02305	395	No	I	-	PTHR12565:SF3 (PANTHER); PTHR12565 (PANTHER)	Yes	No	No	-
1144	Mcal_1144	isotig02307	395	No	I	-	-	No	No	No	-
1145	Mcal_1145	isotig02312	398	No	I	-	PTHR23244 (PANTHER); PTHR23244:SF283 (PANTHER)	Yes	No	No	-
1146	Mcal_1146	isotig02313	398	No	I	-	-	No	No	No	-
1147	Mcal_1147	isotig02314	398	No	I	P:GO:0016070; F:GO:0003677; P:GO:0006413; F:GO:0003743; F:GO:0005515	IPR016021 (G3DSA:1.25.40.GENE3D); PTHR23253 (PANTHER); PTHR23253:SF28 (PANTHER); IPR003307 (PROSITE_PROFILES); IPR016024 (SUPERFAMILY)	Yes	No	No	-
1148	Mcal_1148	isotig02321	397	No	I	C:GO:0005634	IPR012973 (PFAM); PTHR11702 (PANTHER); PTHR11702:SF23 (PANTHER)	Yes	No	No	-
1149	Mcal_1149	isotig02322	389	No	I	P:GO:0008152; F:GO:0016491	IPR002347 (PRINTS); IPR002198 (PFAM); IPR016040 (G3DSA:3.40.50.GENE3D); PTHR24316 (PANTHER); PTHR24316:SF214 (PANTHER); IPR020904 (PROSITE_PATTERNS); SSF51735 (SUPERFAMILY)	Yes	Yes	No	-
1150	Mcal_1150	isotig02324	397	No	I	-	Coil (COILS); IPR013865 (PANTHER)	Yes	No	No	-
1151	Mcal_1151	isotig02326	397	No	I	-	-	No	No	No	-
1152	Mcal_1152	isotig02327	395	No	I	F:GO:0008270	IPR001876 (SMART); IPR001876 (PFAM); PTHR12920 (PANTHER); IPR001876 (PROSITE_PATTERNS); IPR001876 (PROSITE_PROFILES); SSF90209 (SUPERFAMILY)	Yes	No	No	-
1153	Mcal_1153	isotig02335	396	No	I	-	-	No	No	No	-
1154	Mcal_1154	isotig02338	395	No	I	F:GO:0080019	IPR013120 (PFAM); IPR016040 (G3DSA:3.40.50.GENE3D); IPR026055 (PANTHER); SSF51735 (SUPERFAMILY)	Yes	No	No	-
1155	Mcal_1155	isotig02346	395	No	I	F:GO:0050661; P:GO:0006098; F:GO:0004616	PR00076 (PRINTS); IPR006115 (PFAM); IPR016040 (G3DSA:3.40.50.GENE3D); PTHR11811 (PANTHER); SSF51735 (SUPERFAMILY)	Yes	No	Yes	map00030 map00480
1156	Mcal_1156	isotig02348	391	No	I	-	-	No	No	No	-
1157	Mcal_1157	isotig02352	395	No	I	-	SIGNAL_PEPTIDE_N_REGION (PHOBIUS); SIGNAL_PEPTIDE_C_REGION (PHOBIUS); SIGNAL_PEPTIDE (PHOBIUS); SIGNAL_PEPTIDE_H_REGION (PHOBIUS); NON_CYTOPLASMIC_DOMAIN (PHOBIUS); TMhelix (TMHMM)	No	No	No	-
1158	Mcal_1158	isotig02355	391	No	I	F:GO:0050661; P:GO:0006098; F:GO:0004616	IPR006114 (PFAM); IPR013328 (G3DSA:1.10.1040.GENE3D); PTHR11811 (PANTHER); IPR008927 (SUPERFAMILY)	Yes	No	Yes	map00030 map00480
1159	Mcal_1159	isotig02360	394	No	I	F:GO:0047617; P:GO:0051289; C:GO:0005739	IPR029069 (G3DSA:3.10.129.GENE3D); IPR006683 (PFAM); IPR003736 (TIGRFAM); PTHR21660 (PANTHER); IPR029069 (SUPERFAMILY)	Yes	No	No	-
1160	Mcal_1160	isotig02372	392	No	I	-	-	Yes	No	No	-
1161	Mcal_1161	isotig02380	392	No	I	-	-	No	No	No	-
1162	Mcal_1162	isotig02382	392	No	I	-	TRANSMEMBRANE (PHOBIUS); NON_CYTOPLASMIC_DOMAIN (PHOBIUS); CYTOPLASMIC_DOMAIN (PHOBIUS); TMhelix (TMHMM)	No	No	No	-
1163	Mcal_1163	isotig02383	384	No	I	-	-	No	No	No	-
1164	Mcal_1164	isotig02387	392	No	I	-	IPR019173 (PFAM); IPR019173 (PANTHER); NON_CYTOPLASMIC_DOMAIN (PHOBIUS); CYTOPLASMIC_DOMAIN (PHOBIUS); TRANSMEMBRANE (PHOBIUS); TMhelix (TMHMM)	Yes	Yes	No	-
1165	Mcal_1165	isotig02399	390	No	I	-	-	No	No	No	-
1166	Mcal_1166	isotig02411	388	No	I	-	-	Yes	No	No	-
1167	Mcal_1167	isotig02413	388	No	I	-	-	No	No	No	-
1168	Mcal_1168	isotig02417	386	No	I	-	-	No	No	No	-
1169	Mcal_1169	isotig02429	388	No	I	F:GO:0004743; P:GO:0016310; F:GO:0030955; F:GO:0000287; P:GO:0006096	IPR001697 (PRINTS); IPR015794 (G3DSA:3.40.1380.GENE3D); IPR015813 (G3DSA:3.20.20.GENE3D); IPR015793 (PFAM); IPR001697 (PANTHER); IPR015813 (SUPERFAMILY)	Yes	No	No	map00230 map00620 map00010
1170	Mcal_1170	isotig02437	385	No	I	P:GO:0055085; F:GO:0022857; C:GO:0016021	IPR005828 (PFAM); G3DSA:1.20.1250.20 (GENE3D); PTHR24064 (PANTHER); IPR005829 (PROSITE_PATTERNS); CYTOPLASMIC_DOMAIN (PHOBIUS); TRANSMEMBRANE (PHOBIUS); TRANSMEMBRANE (PHOBIUS); NON_CYTOPLASMIC_DOMAIN (PHOBIUS); CYTOPLASMIC_DOMAIN (PHOBIUS); NON_CYTOPLASMIC_DOMAIN (PHOBIUS); TRANSMEMBRANE (PHOBIUS); IPR020846 (PROSITE_PROFILES); IPR016196 (SUPERFAMILY); TMhelix (TMHMM); TMhelix (TMHMM); TMhelix (…	Yes	No	No	-
1171	Mcal_1171	isotig02439	385	No	I	-	-	Yes	No	No	-
1172	Mcal_1172	isotig02443	381	No	I	-	-	No	No	No	-
1173	Mcal_1173	isotig02451	382	No	I	F:GO:0003723; F:GO:0004000; P:GO:0006396	IPR002466 (PFAM); PTHR10910 (PANTHER); PTHR10910:SF90 (PANTHER); CYTOPLASMIC_DOMAIN (PHOBIUS); NON_CYTOPLASMIC_DOMAIN (PHOBIUS); TRANSMEMBRANE (PHOBIUS); IPR002466 (PROSITE_PROFILES); TMhelix (TMHMM)	Yes	No	No	map00230
1174	Mcal_1174	isotig02457	380	No	I	F:GO:0008233; P:GO:0006465; C:GO:0016021; C:GO:0005787	IPR007653 (PFAM); IPR007653 (PANTHER)	Yes	No	Yes	-
1175	Mcal_1175	isotig02458	383	No	I	-	TRANSMEMBRANE (PHOBIUS); CYTOPLASMIC_DOMAIN (PHOBIUS); NON_CYTOPLASMIC_DOMAIN (PHOBIUS); TMhelix (TMHMM)	No	No	No	-
1176	Mcal_1176	isotig02468	376	No	I	-	-	No	No	No	-
1177	Mcal_1177	isotig02484	380	No	I	-	-	Yes	No	No	-
1178	Mcal_1178	isotig02490	380	No	I	-	-	No	No	No	-
1179	Mcal_1179	isotig02491	380	No	I	-	-	No	No	No	-
1180	Mcal_1180	isotig02496	379	No	I	P:GO:0006468; F:GO:0005524; F:GO:0004674	IPR018934 (PFAM); G3DSA:3.30.200.20 (GENE3D); PTHR10593:SF22 (PANTHER); PTHR10593 (PANTHER)	Yes	Yes	Yes	-
1181	Mcal_1181	isotig02497	377	No	I	-	TMhelix (TMHMM)	No	No	No	-
1182	Mcal_1182	isotig02499	374	No	I	-	CYTOPLASMIC_DOMAIN (PHOBIUS); NON_CYTOPLASMIC_DOMAIN (PHOBIUS); TRANSMEMBRANE (PHOBIUS)	No	No	No	-
1183	Mcal_1183	isotig02515	377	No	I	P:GO:0009058; F:GO:0016844; C:GO:0009986; C:GO:0016020; F:GO:0004064	IPR011042 (G3DSA:2.120.10.GENE3D); PTHR10426:SF4 (PANTHER); PTHR10426 (PANTHER); NON_CYTOPLASMIC_DOMAIN (PHOBIUS); CYTOPLASMIC_DOMAIN (PHOBIUS); TRANSMEMBRANE (PHOBIUS); SSF63829 (SUPERFAMILY)	Yes	No	No	map00901 map00363
1184	Mcal_1184	isotig02516	376	No	I	-	-	Yes	No	No	-
1185	Mcal_1185	isotig02518	375	No	I	F:GO:0004252; P:GO:0006508	IPR023562 (PFAM); IPR029045 (G3DSA:3.90.226.GENE3D); PTHR10381:SF11 (PANTHER); IPR023562 (PANTHER); SIGNAL_PEPTIDE_N_REGION (PHOBIUS); NON_CYTOPLASMIC_DOMAIN (PHOBIUS); SIGNAL_PEPTIDE_C_REGION (PHOBIUS); SIGNAL_PEPTIDE (PHOBIUS); SIGNAL_PEPTIDE_H_REGION (PHOBIUS); IPR029045 (SUPERFAMILY)	Yes	Yes	No	-
1186	Mcal_1186	isotig02523	376	No	I	-	TMhelix (TMHMM)	No	No	No	-
1187	Mcal_1187	isotig02530	375	No	I	-	PTHR16308 (PANTHER)	Yes	No	No	-
1188	Mcal_1188	isotig02534	375	No	I	F:GO:0016787	NON_CYTOPLASMIC_DOMAIN (PHOBIUS); CYTOPLASMIC_DOMAIN (PHOBIUS); TRANSMEMBRANE (PHOBIUS)	Yes	No	No	-
1189	Mcal_1189	isotig02536	373	No	I	-	-	No	No	No	-
1190	Mcal_1190	isotig02541	374	No	I	-	-	No	No	No	-
1191	Mcal_1191	isotig02544	368	No	I	-	-	No	No	No	-
1192	Mcal_1192	isotig02545	374	No	I	F:GO:0033989; F:GO:0016491; F:GO:0032934; P:GO:0055114	IPR003033 (PFAM); IPR003033 (G3DSA:3.30.1050.GENE3D); PTHR10094:SF12 (PANTHER); PTHR10094 (PANTHER); IPR003033 (SUPERFAMILY)	Yes	No	No	map00120
1193	Mcal_1193	isotig02548	375	No	I	-	IPR009613 (PFAM); PTHR14463:SF5 (PANTHER); PTHR14463 (PANTHER)	Yes	No	No	-
1194	Mcal_1194	isotig02555	373	No	I	-	-	Yes	No	No	-
1195	Mcal_1195	isotig02560	370	No	I	-	IPR019329 (PFAM); G3DSA:3.40.190.10 (GENE3D); PTHR13327:SF0 (PANTHER); PTHR13327 (PANTHER); CYTOPLASMIC_DOMAIN (PHOBIUS); NON_CYTOPLASMIC_DOMAIN (PHOBIUS); TRANSMEMBRANE (PHOBIUS); TMhelix (TMHMM)	Yes	Yes	No	-
1196	Mcal_1196	isotig02571	371	No	I	F:GO:0016884; F:GO:0016740; F:GO:0004040	IPR000120 (PFAM); IPR023631 (G3DSA:3.90.1300.GENE3D); IPR000120 (PANTHER); PTHR11895:SF60 (PANTHER); IPR023631 (SUPERFAMILY)	Yes	No	Yes	map00330 map00627 map00380 map00360 map00643
1197	Mcal_1197	isotig02573	371	No	I	-	-	No	No	No	-
1198	Mcal_1198	isotig02576	368	No	I	F:GO:0016787; P:GO:0006810; C:GO:0005622; F:GO:0005215	IPR011074 (SMART); G3DSA:1.10.8.20 (GENE3D); IPR011074 (PFAM); IPR011074 (SUPERFAMILY)	Yes	No	No	-
1199	Mcal_1199	isotig02580	370	No	I	-	-	Yes	No	No	-
1200	Mcal_1200	isotig02583	367	No	I	-	SIGNAL_PEPTIDE_H_REGION (PHOBIUS); SIGNAL_PEPTIDE_C_REGION (PHOBIUS); NON_CYTOPLASMIC_DOMAIN (PHOBIUS); SIGNAL_PEPTIDE_N_REGION (PHOBIUS); SIGNAL_PEPTIDE (PHOBIUS); SignalP-TM (SIGNALP_GRAM_POSITIVE); TMhelix (TMHMM)	No	No	No	-
1201	Mcal_1201	isotig02599	367	No	I	-	-	Yes	No	No	-
1202	Mcal_1202	isotig02609	361	No	I	-	-	Yes	No	No	-
1203	Mcal_1203	isotig02611	363	No	I	-	IPR018865 (PFAM); PTHR15243 (PANTHER); PTHR15243:SF0 (PANTHER)	Yes	No	No	-
1204	Mcal_1204	isotig02629	362	No	I	F:GO:0004364; P:GO:0008152	-	Yes	No	No	map00982 map00980 map00480
1205	Mcal_1205	isotig02631	364	No	I	-	-	Yes	No	No	-
1206	Mcal_1206	isotig02635	361	No	I	-	-	No	No	No	-
1207	Mcal_1207	isotig02637	362	No	I	P:GO:0006457	IPR001179 (PFAM); G3DSA:3.10.50.40 (GENE3D); IPR001179 (PROSITE_PROFILES); SSF54534 (SUPERFAMILY)	Yes	Yes	Yes	-
1208	Mcal_1208	isotig02645	362	No	I	-	-	Yes	No	No	-
1209	Mcal_1209	isotig02651	362	No	I	-	-	Yes	No	No	-
1210	Mcal_1210	isotig02653	360	No	I	-	CYTOPLASMIC_DOMAIN (PHOBIUS); NON_CYTOPLASMIC_DOMAIN (PHOBIUS); TRANSMEMBRANE (PHOBIUS); TMhelix (TMHMM)	No	No	No	-
1211	Mcal_1211	isotig02654	356	No	I	P:GO:0006413; F:GO:0003743	-	Yes	No	No	-
1212	Mcal_1212	isotig02655	359	No	I	F:GO:0003735; C:GO:0005840; P:GO:0006412; F:GO:0019843	IPR020040 (PFAM); IPR020040 (G3DSA:3.90.930.GENE3D); IPR000702 (PANTHER); IPR020040 (SUPERFAMILY)	Yes	No	No	-
1213	Mcal_1213	isotig02658	361	No	I	-	-	No	No	No	-
1214	Mcal_1214	isotig02659	361	No	I	-	-	Yes	No	No	-
1215	Mcal_1215	isotig02663	356	No	I	F:GO:0005219; P:GO:0006874; P:GO:0055085; P:GO:0006811; C:GO:0016021	IPR009460 (PFAM); CYTOPLASMIC_DOMAIN (PHOBIUS); TRANSMEMBRANE (PHOBIUS); NON_CYTOPLASMIC_DOMAIN (PHOBIUS); TMhelix (TMHMM)	Yes	No	No	-
1216	Mcal_1216	isotig02664	358	No	I	-	-	No	No	No	-
1217	Mcal_1217	isotig02687	353	No	I	-	TMhelix (TMHMM); TMhelix (TMHMM)	No	No	No	-
1218	Mcal_1218	isotig02704	354	No	I	-	-	Yes	No	No	-
1219	Mcal_1219	isotig02709	354	No	I	F:GO:0003676; C:GO:0005634; F:GO:0008270	IPR024598 (PFAM); PTHR12786 (PANTHER); PTHR12786:SF2 (PANTHER); IPR000690 (PROSITE_PROFILES)	Yes	Yes	Yes	-
1220	Mcal_1220	isotig02710	350	No	I	C:GO:0016020	IPR000998 (PFAM); IPR000998 (PROSITE_PROFILES)	Yes	No	No	-
1221	Mcal_1221	isotig02711	354	No	I	F:GO:0003700; P:GO:0006979; F:GO:0043565; F:GO:0004602; P:GO:0006355; P:GO:0055114	-	Yes	No	No	map00590 map00480
1222	Mcal_1222	isotig02712	351	No	I	-	-	Yes	No	No	-
1223	Mcal_1223	isotig02715	353	No	I	-	-	Yes	No	No	-
1224	Mcal_1224	isotig02721	352	No	I	-	IPR007042 (PFAM); PTHR13165 (PANTHER); PTHR13165:SF0 (PANTHER)	Yes	No	No	-
1225	Mcal_1225	isotig02732	348	No	I	-	-	Yes	No	No	-
1226	Mcal_1226	isotig02733	350	No	I	F:GO:0016747	PTHR11161 (PANTHER); PTHR11161:SF0 (PANTHER)	Yes	No	No	-
1227	Mcal_1227	isotig02736	350	No	I	C:GO:0005737; F:GO:0008233; P:GO:0030163; F:GO:0005524; F:GO:0017111; P:GO:0006508	Coil (COILS); PTHR23073:SF12 (PANTHER); PTHR23073 (PANTHER)	Yes	Yes	Yes	map00230 map00730
1228	Mcal_1228	isotig02739	350	No	I	-	-	Yes	No	No	-
1229	Mcal_1229	isotig02751	346	No	I	F:GO:0008270; F:GO:0016740	IPR001781 (SMART); IPR001781 (PFAM); IPR001781 (G3DSA:2.10.110.GENE3D); PTHR24214:SF29 (PANTHER); PTHR24214 (PANTHER); IPR001781 (PROSITE_PATTERNS); IPR001781 (PROSITE_PROFILES); SSF57716 (SUPERFAMILY); SSF57716 (SUPERFAMILY)	Yes	Yes	No	-
1230	Mcal_1230	isotig02754	341	No	I	P:GO:0005975; F:GO:0043169; F:GO:0003824	IPR006048 (SMART); IPR013780 (G3DSA:2.60.40.GENE3D); IPR006048 (PFAM); IPR015902 (PANTHER); PTHR10357:SF116 (PANTHER); SSF51011 (SUPERFAMILY)	Yes	No	No	-
1231	Mcal_1231	isotig02757	344	No	I	C:GO:0005622	-	Yes	No	No	-
1232	Mcal_1232	isotig02760	344	No	I	-	TMhelix (TMHMM)	No	No	No	-
1233	Mcal_1233	isotig02761	344	No	I	F:GO:0004579; C:GO:0016021; C:GO:0008250	IPR003038 (PFAM); IPR003038 (PANTHER); TRANSMEMBRANE (PHOBIUS); NON_CYTOPLASMIC_DOMAIN (PHOBIUS); CYTOPLASMIC_DOMAIN (PHOBIUS); TRANSMEMBRANE (PHOBIUS); NON_CYTOPLASMIC_DOMAIN (PHOBIUS); SignalP-TM (SIGNALP_EUK); SignalP-TM (SIGNALP_GRAM_POSITIVE); TMhelix (TMHMM); TMhelix (TMHMM)	Yes	No	Yes	-
1234	Mcal_1234	isotig02765	346	No	I	-	-	No	No	No	-
1235	Mcal_1235	isotig02767	343	No	I	F:GO:0015035	IPR001853 (PFAM); IPR012336 (G3DSA:3.40.30.GENE3D); PTHR13887 (PANTHER); IPR012336 (SUPERFAMILY)	Yes	No	No	-
1236	Mcal_1236	isotig02775	343	No	I	-	IPR013969 (PFAM); IPR013969 (PANTHER); PTHR12154:SF2 (PANTHER)	Yes	No	No	-
1237	Mcal_1237	isotig02776	345	No	I	-	-	No	No	No	-
1238	Mcal_1238	isotig02780	344	No	I	-	CYTOPLASMIC_DOMAIN (PHOBIUS); TRANSMEMBRANE (PHOBIUS); NON_CYTOPLASMIC_DOMAIN (PHOBIUS); TMhelix (TMHMM)	Yes	No	No	-
1239	Mcal_1239	isotig02782	342	No	I	-	-	Yes	No	No	-
1240	Mcal_1240	isotig02783	344	No	I	F:GO:0003676; P:GO:0006413; F:GO:0003743	TRANSMEMBRANE (PHOBIUS); CYTOPLASMIC_DOMAIN (PHOBIUS); NON_CYTOPLASMIC_DOMAIN (PHOBIUS); TMhelix (TMHMM)	Yes	No	No	-
1241	Mcal_1241	isotig02785	342	No	I	-	TRANSMEMBRANE (PHOBIUS); CYTOPLASMIC_DOMAIN (PHOBIUS); NON_CYTOPLASMIC_DOMAIN (PHOBIUS); TMhelix (TMHMM)	Yes	No	No	-
1242	Mcal_1242	isotig02787	337	No	I	-	IPR011687 (PFAM)	Yes	No	No	-
1243	Mcal_1243	isotig02791	335	No	I	F:GO:0022857; C:GO:0016021; P:GO:0055085	PTHR24064 (PANTHER); PTHR24064:SF175 (PANTHER); NON_CYTOPLASMIC_DOMAIN (PHOBIUS); TRANSMEMBRANE (PHOBIUS); CYTOPLASMIC_DOMAIN (PHOBIUS); TMhelix (TMHMM)	Yes	No	No	-
1244	Mcal_1244	isotig02799	341	No	I	C:GO:0045261; P:GO:0015986; F:GO:0046961; F:GO:0046933	IPR020546 (PFAM); IPR020546 (G3DSA:2.60.15.GENE3D); IPR001469 (PANTHER); IPR020546 (SUPERFAMILY)	Yes	No	Yes	-
1245	Mcal_1245	isotig02801	340	No	I	-	-	No	No	No	-
1246	Mcal_1246	isotig02803	339	No	I	-	NON_CYTOPLASMIC_DOMAIN (PHOBIUS); SIGNAL_PEPTIDE_N_REGION (PHOBIUS); SIGNAL_PEPTIDE_C_REGION (PHOBIUS); SIGNAL_PEPTIDE (PHOBIUS); SIGNAL_PEPTIDE_H_REGION (PHOBIUS)	No	No	No	-
1247	Mcal_1247	isotig02805	335	No	I	C:GO:0016021	IPR018732 (PFAM); PTHR31488:SF1 (PANTHER); PTHR31488 (PANTHER); NON_CYTOPLASMIC_DOMAIN (PHOBIUS); TRANSMEMBRANE (PHOBIUS); CYTOPLASMIC_DOMAIN (PHOBIUS); TRANSMEMBRANE (PHOBIUS); NON_CYTOPLASMIC_DOMAIN (PHOBIUS); TMhelix (TMHMM); TMhelix (TMHMM)	Yes	No	No	-
1248	Mcal_1248	isotig02807	337	No	I	-	TRANSMEMBRANE (PHOBIUS); CYTOPLASMIC_DOMAIN (PHOBIUS); NON_CYTOPLASMIC_DOMAIN (PHOBIUS)	No	No	No	-
1249	Mcal_1249	isotig02808	339	No	I	-	-	No	No	No	-
1250	Mcal_1250	isotig02830	328	No	I	-	-	Yes	Yes	No	-
1251	Mcal_1251	isotig02837	336	No	I	-	-	No	No	No	-
1252	Mcal_1252	isotig02845	334	No	I	-	-	No	No	No	-
1253	Mcal_1253	isotig02847	331	No	I	-	PS51257 (PROSITE_PROFILES)	No	No	No	-
1254	Mcal_1254	isotig02849	332	No	I	F:GO:0030674; C:GO:0044424; F:GO:0051015	CYTOPLASMIC_DOMAIN (PHOBIUS); TRANSMEMBRANE (PHOBIUS); NON_CYTOPLASMIC_DOMAIN (PHOBIUS); TMhelix (TMHMM)	Yes	No	No	-
1255	Mcal_1255	isotig02860	331	No	I	-	SignalP-TM (SIGNALP_GRAM_POSITIVE)	No	No	No	-
1256	Mcal_1256	isotig02870	330	No	I	-	NON_CYTOPLASMIC_DOMAIN (PHOBIUS); SIGNAL_PEPTIDE_N_REGION (PHOBIUS); SIGNAL_PEPTIDE (PHOBIUS); SIGNAL_PEPTIDE_C_REGION (PHOBIUS); SIGNAL_PEPTIDE_H_REGION (PHOBIUS); SignalP-noTM (SIGNALP_EUK)	No	No	No	-
1257	Mcal_1257	isotig02877	329	No	I	C:GO:0031983; F:GO:0042277; P:GO:0035814; F:GO:0004177; P:GO:0006508; C:GO:0012506; P:GO:0006725	-	Yes	No	No	-
1258	Mcal_1258	isotig02884	328	No	I	-	SIGNAL_PEPTIDE (PHOBIUS); SIGNAL_PEPTIDE_H_REGION (PHOBIUS); NON_CYTOPLASMIC_DOMAIN (PHOBIUS); SIGNAL_PEPTIDE_N_REGION (PHOBIUS); SIGNAL_PEPTIDE_C_REGION (PHOBIUS); TMhelix (TMHMM)	No	No	No	-
1259	Mcal_1259	isotig02894	326	No	I	-	TRANSMEMBRANE (PHOBIUS); NON_CYTOPLASMIC_DOMAIN (PHOBIUS); CYTOPLASMIC_DOMAIN (PHOBIUS)	Yes	No	No	-
1260	Mcal_1260	isotig02899	323	No	I	-	-	Yes	No	Yes	-
1261	Mcal_1261	isotig02902	323	No	I	-	-	No	No	No	-
1262	Mcal_1262	isotig02910	321	No	I	-	IPR009091 (G3DSA:2.130.10.GENE3D); IPR000408 (PFAM); IPR000408 (PROSITE_PATTERNS); IPR000408 (PROSITE_PROFILES); IPR009091 (SUPERFAMILY)	Yes	No	No	-
1263	Mcal_1263	isotig02913	324	No	I	-	-	Yes	No	No	-
1264	Mcal_1264	isotig02917	323	No	I	-	NON_CYTOPLASMIC_DOMAIN (PHOBIUS); TRANSMEMBRANE (PHOBIUS); CYTOPLASMIC_DOMAIN (PHOBIUS); TMhelix (TMHMM)	No	No	No	-
1265	Mcal_1265	isotig02919	319	No	I	-	-	No	No	No	-
1266	Mcal_1266	isotig02924	317	No	I	-	-	No	No	No	-
1267	Mcal_1267	isotig02926	320	No	I	C:GO:0032982; C:GO:0030016; F:GO:0003774; F:GO:0032440; P:GO:0055114	Coil (COILS); Coil (COILS); IPR002928 (PFAM); PTHR13140:SF164 (PANTHER); PTHR13140 (PANTHER)	Yes	No	No	-
1268	Mcal_1268	isotig02931	317	No	I	-	TMhelix (TMHMM)	No	No	No	-
1269	Mcal_1269	isotig02936	321	No	I	-	-	No	No	No	-
1270	Mcal_1270	isotig02946	318	No	I	-	-	No	No	No	-
1271	Mcal_1271	isotig02947	318	No	I	-	-	Yes	No	No	-
1272	Mcal_1272	isotig02949	319	No	I	-	-	No	No	No	-
1273	Mcal_1273	isotig02951	316	No	I	-	-	Yes	No	No	-
1274	Mcal_1274	isotig02964	316	No	I	-	-	Yes	No	No	-
1275	Mcal_1275	isotig02965	315	No	I	-	CYTOPLASMIC_DOMAIN (PHOBIUS); NON_CYTOPLASMIC_DOMAIN (PHOBIUS); TRANSMEMBRANE (PHOBIUS); TMhelix (TMHMM)	No	No	No	-
1276	Mcal_1276	isotig02968	313	No	I	-	-	No	No	No	-
1277	Mcal_1277	isotig02976	314	No	I	C:GO:0032982; C:GO:0030016; F:GO:0003774; F:GO:0032440; P:GO:0055114	Coil (COILS); IPR002928 (PFAM); PTHR13140:SF164 (PANTHER); PTHR13140 (PANTHER); SSF90257 (SUPERFAMILY)	Yes	No	No	-
1278	Mcal_1278	isotig02978	313	No	I	F:GO:0004812; P:GO:0006418; F:GO:0000166	Coil (COILS)	Yes	Yes	No	-
1279	Mcal_1279	isotig02980	311	No	I	-	-	No	No	No	-
1280	Mcal_1280	isotig02983	311	No	I	-	-	Yes	No	No	-
1281	Mcal_1281	isotig02986	311	No	I	-	-	Yes	No	No	-
1282	Mcal_1282	isotig03000	308	No	I	-	TMhelix (TMHMM)	No	No	No	-
1283	Mcal_1283	isotig03001	303	No	I	F:GO:0004842; P:GO:0016567	IPR000608 (PFAM); IPR016135 (G3DSA:3.10.110.GENE3D); PTHR24067 (PANTHER); IPR000608 (PROSITE_PROFILES); IPR016135 (SUPERFAMILY)	Yes	Yes	Yes	-
1284	Mcal_1284	isotig03010	305	No	I	-	SIGNAL_PEPTIDE_N_REGION (PHOBIUS); SIGNAL_PEPTIDE_C_REGION (PHOBIUS); SIGNAL_PEPTIDE (PHOBIUS); NON_CYTOPLASMIC_DOMAIN (PHOBIUS); SIGNAL_PEPTIDE_H_REGION (PHOBIUS)	No	No	No	-
1285	Mcal_1285	isotig03016	302	No	I	-	-	No	No	No	-
1286	Mcal_1286	isotig03027	301	No	I	-	-	No	No	No	-
1287	Mcal_1287	isotig03031	292	No	I	-	-	No	No	No	-
1288	Mcal_1288	isotig03032	301	No	I	-	-	No	No	No	-
1289	Mcal_1289	isotig03040	300	No	I	F:GO:0046872; F:GO:0004222; P:GO:0006508	IPR007863 (PFAM); IPR011237 (G3DSA:3.30.830.GENE3D); PTHR11851:SF49 (PANTHER); PTHR11851 (PANTHER); IPR011249 (SUPERFAMILY)	Yes	Yes	Yes	-
1290	Mcal_1290	isotig03048	297	No	I	-	IPR008978 (G3DSA:2.60.40.GENE3D); PTHR10588:SF114 (PANTHER); PTHR10588 (PANTHER)	Yes	No	No	-
1291	Mcal_1291	isotig03057	295	No	I	-	SIGNAL_PEPTIDE_N_REGION (PHOBIUS); NON_CYTOPLASMIC_DOMAIN (PHOBIUS); SIGNAL_PEPTIDE_H_REGION (PHOBIUS); SIGNAL_PEPTIDE_C_REGION (PHOBIUS); SIGNAL_PEPTIDE (PHOBIUS)	No	No	No	-
1292	Mcal_1292	isotig03058	295	No	I	-	NON_CYTOPLASMIC_DOMAIN (PHOBIUS); TRANSMEMBRANE (PHOBIUS); CYTOPLASMIC_DOMAIN (PHOBIUS); TMhelix (TMHMM)	No	No	No	-
1293	Mcal_1293	isotig03067	291	No	I	-	CYTOPLASMIC_DOMAIN (PHOBIUS); TRANSMEMBRANE (PHOBIUS); CYTOPLASMIC_DOMAIN (PHOBIUS); NON_CYTOPLASMIC_DOMAIN (PHOBIUS); TRANSMEMBRANE (PHOBIUS); TMhelix (TMHMM); TMhelix (TMHMM)	No	No	No	-
1294	Mcal_1294	isotig03069	293	No	I	F:GO:0003723	-	Yes	No	Yes	-
1295	Mcal_1295	isotig03075	292	No	I	-	-	No	No	No	-
1296	Mcal_1296	isotig03086	288	No	I	-	-	No	No	No	-
1297	Mcal_1297	isotig03088	287	No	I	-	SignalP-noTM (SIGNALP_EUK)	No	No	No	-
1298	Mcal_1298	isotig03094	286	No	I	F:GO:0016740	CYTOPLASMIC_DOMAIN (PHOBIUS); TRANSMEMBRANE (PHOBIUS); NON_CYTOPLASMIC_DOMAIN (PHOBIUS); TMhelix (TMHMM)	Yes	No	Yes	-
1299	Mcal_1299	isotig03096	287	No	I	-	-	No	No	No	-
1300	Mcal_1300	isotig03098	286	No	I	-	-	Yes	No	No	-
1301	Mcal_1301	isotig03110	283	No	I	-	-	No	No	No	-
1302	Mcal_1302	isotig03112	280	No	I	-	-	No	No	No	-
1303	Mcal_1303	isotig03113	279	No	I	P:GO:0060271; P:GO:0006468; P:GO:0007049; P:GO:0051301; F:GO:0005524; C:GO:0005929; F:GO:0004693; P:GO:0007275; C:GO:0005737; C:GO:0005634	SignalP-TM (SIGNALP_GRAM_POSITIVE)	Yes	Yes	Yes	-
1304	Mcal_1304	isotig03123	276	No	I	-	-	No	No	No	-
1305	Mcal_1305	isotig03126	278	No	I	-	IPR009445 (PFAM); IPR009445 (PANTHER); PTHR19315:SF9 (PANTHER); TRANSMEMBRANE (PHOBIUS); CYTOPLASMIC_DOMAIN (PHOBIUS); NON_CYTOPLASMIC_DOMAIN (PHOBIUS); TMhelix (TMHMM)	Yes	Yes	Yes	-
1306	Mcal_1306	isotig03134	276	No	I	F:GO:0016757	IPR029044 (G3DSA:3.90.550.GENE3D); IPR002495 (PFAM); PTHR11183:SF18 (PANTHER); PTHR11183 (PANTHER); IPR029044 (SUPERFAMILY)	Yes	No	No	-
1307	Mcal_1307	isotig03135	277	No	I	-	SignalP-noTM (SIGNALP_EUK)	Yes	No	No	-
1308	Mcal_1308	isotig03147	272	No	I	-	-	No	No	No	-
1309	Mcal_1309	isotig03154	269	No	I	-	-	No	No	No	-
1310	Mcal_1310	isotig03156	267	No	I	-	IPR011687 (PFAM)	Yes	No	No	-
1311	Mcal_1311	isotig03160	265	No	I	P:GO:0045454	PTHR18929:SF49 (PANTHER); PTHR18929 (PANTHER)	Yes	No	No	-
1312	Mcal_1312	isotig03162	264	No	I	-	-	No	No	No	-
1313	Mcal_1313	isotig03167	265	No	I	-	SIGNAL_PEPTIDE (PHOBIUS); NON_CYTOPLASMIC_DOMAIN (PHOBIUS); SIGNAL_PEPTIDE_C_REGION (PHOBIUS); SIGNAL_PEPTIDE_N_REGION (PHOBIUS); SIGNAL_PEPTIDE_H_REGION (PHOBIUS); SignalP-noTM (SIGNALP_EUK); SignalP-noTM (SIGNALP_GRAM_NEGATIVE); SignalP-TM (SIGNALP_GRAM_POSITIVE); TMhelix (TMHMM)	No	No	No	-
1314	Mcal_1314	isotig03168	265	No	I	-	-	Yes	No	No	-
1315	Mcal_1315	isotig03191	258	No	I	-	TRANSMEMBRANE (PHOBIUS); CYTOPLASMIC_DOMAIN (PHOBIUS); NON_CYTOPLASMIC_DOMAIN (PHOBIUS); TMhelix (TMHMM)	Yes	No	No	-
1316	Mcal_1316	isotig03193	255	No	I	-	-	No	No	No	-
1317	Mcal_1317	isotig03195	255	No	I	-	Coil (COILS)	Yes	No	No	-
1318	Mcal_1318	isotig03196	255	No	I	C:GO:0005840; F:GO:0003735; P:GO:0006412	IPR002674 (PFAM); IPR011331 (G3DSA:2.20.25.GENE3D); PTHR11517 (PANTHER); IPR011332 (SUPERFAMILY)	Yes	No	Yes	-
1319	Mcal_1319	isotig03199	253	No	I	-	NON_CYTOPLASMIC_DOMAIN (PHOBIUS); TRANSMEMBRANE (PHOBIUS); CYTOPLASMIC_DOMAIN (PHOBIUS); TMhelix (TMHMM)	No	No	No	-
1320	Mcal_1320	isotig03205	244	No	I	-	-	No	No	No	-
1321	Mcal_1321	isotig03211	247	No	I	-	IPR013260 (PFAM)	Yes	Yes	No	-
1322	Mcal_1322	isotig03221	246	No	I	-	-	Yes	No	No	-
1323	Mcal_1323	isotig03230	239	No	I	-	-	No	No	No	-
1324	Mcal_1324	isotig03247	237	No	I	P:GO:0055085; F:GO:0017056; C:GO:0005829; C:GO:0031080; C:GO:0031965; F:GO:0005487; P:GO:0051292; P:GO:0005975; P:GO:0019221; C:GO:0000776; C:GO:0034399; F:GO:0005515; P:GO:0006406; P:GO:0016032; P:GO:0044281; P:GO:0010827; P:GO:0007077	IPR007252 (PFAM); IPR007252 (PANTHER)	Yes	Yes	No	-
1325	Mcal_1325	isotig03257	231	No	I	-	NON_CYTOPLASMIC_DOMAIN (PHOBIUS); SIGNAL_PEPTIDE_N_REGION (PHOBIUS); SIGNAL_PEPTIDE_C_REGION (PHOBIUS); SIGNAL_PEPTIDE (PHOBIUS); SIGNAL_PEPTIDE_H_REGION (PHOBIUS); TMhelix (TMHMM)	No	No	No	-
1326	Mcal_1326	isotig03259	221	No	I	-	TRANSMEMBRANE (PHOBIUS); NON_CYTOPLASMIC_DOMAIN (PHOBIUS); CYTOPLASMIC_DOMAIN (PHOBIUS)	No	No	No	-
1327	Mcal_1327	isotig03270	226	No	I	-	-	No	No	No	-
1328	Mcal_1328	isotig03272	226	No	I	-	-	Yes	No	No	-
1329	Mcal_1329	isotig03278	225	No	I	C:GO:0043231; C:GO:0044444; P:GO:0043154; P:GO:0043066; P:GO:0019079	IPR024135 (PANTHER)	Yes	No	No	-
1330	Mcal_1330	isotig03282	223	No	I	-	-	Yes	No	No	-
1331	Mcal_1331	isotig03284	222	No	I	-	-	No	No	No	-
1332	Mcal_1332	isotig03292	214	No	I	-	-	No	No	No	-
1333	Mcal_1333	isotig03296	217	No	I	-	-	No	No	No	-
1334	Mcal_1334	isotig03316	209	No	I	-	-	No	No	No	-
1335	Mcal_1335	isotig03325	201	No	I	F:GO:0016208; F:GO:0003987; P:GO:0019427	-	Yes	No	No	map00720 map00620 map00680 map00010 map00640
1336	Mcal_1336	isotig03329	202	No	I	-	-	No	No	No	-
1337	Mcal_1337	isotig03334	199	No	I	F:GO:0043141; F:GO:0008270	IPR027417 (G3DSA:3.40.50.GENE3D); PF13087 (PFAM); PTHR10887:SF140 (PANTHER); PTHR10887 (PANTHER); IPR027417 (SUPERFAMILY)	Yes	No	No	-
1338	Mcal_1338	isotig03345	188	No	I	-	-	Yes	No	No	-
1339	Mcal_1339	isotig03367	187	No	I	F:GO:0032440; P:GO:0055114; F:GO:0016779	IPR029044 (G3DSA:3.90.550.GENE3D); IPR002618 (PANTHER); PTHR11952:SF4 (PANTHER); IPR029044 (SUPERFAMILY)	Yes	Yes	No	-
1340	Mcal_1340	isotig03370	188	No	I	-	-	No	No	No	-
1341	Mcal_1341	isotig03371	189	No	I	-	-	No	No	No	-
1342	Mcal_1342	isotig03373	188	No	I	-	-	No	No	No	-
1343	Mcal_1343	isotig03383	187	No	I	-	-	No	No	No	-
1344	Mcal_1344	isotig03386	186	No	I	P:GO:0006629; P:GO:0055114; F:GO:0016717; F:GO:0016491; C:GO:0016021; P:GO:0006633	CYTOPLASMIC_DOMAIN (PHOBIUS); TRANSMEMBRANE (PHOBIUS); NON_CYTOPLASMIC_DOMAIN (PHOBIUS); TMhelix (TMHMM)	Yes	No	No	-
1345	Mcal_1345	isotig03387	183	No	I	C:GO:0005737; C:GO:0005839; C:GO:0005634; F:GO:0004298; P:GO:0051603	IPR029055 (G3DSA:3.60.20.GENE3D); IPR001353 (PFAM); PTHR11599 (PANTHER); PTHR11599:SF3 (PANTHER); IPR029055 (SUPERFAMILY)	Yes	Yes	Yes	-
1346	Mcal_1346	isotig03388	184	No	I	-	-	No	No	No	-
1347	Mcal_1347	isotig03389	178	No	I	-	-	No	No	No	-
1348	Mcal_1348	isotig03402	178	No	I	-	-	No	No	No	-
1349	Mcal_1349	isotig03420	170	No	I	-	SIGNAL_PEPTIDE_C_REGION (PHOBIUS); SIGNAL_PEPTIDE_N_REGION (PHOBIUS); SIGNAL_PEPTIDE (PHOBIUS); NON_CYTOPLASMIC_DOMAIN (PHOBIUS); SIGNAL_PEPTIDE_H_REGION (PHOBIUS); SignalP-TM (SIGNALP_GRAM_POSITIVE)	No	No	No	-
1350	Mcal_1350	isotig03423	167	No	I	-	-	No	No	No	-
1351	Mcal_1351	isotig03437	162	No	I	-	-	No	No	No	-
1352	Mcal_1352	isotig03440	159	No	I	-	-	No	No	No	-
1353	Mcal_1353	isotig03450	154	No	I	-	-	Yes	No	No	-
1354	Mcal_1354	isotig03460	152	No	I	-	-	No	No	No	-
1355	Mcal_1355	isotig03473	147	No	I	C:GO:0000786; F:GO:0003677; P:GO:0006334; C:GO:0005634; F:GO:0046982	IPR002119 (PRINTS); IPR002119 (SMART); IPR009072 (G3DSA:1.10.20.GENE3D); IPR007125 (PFAM); PTHR23430 (PANTHER); PTHR23430:SF45 (PANTHER); IPR009072 (SUPERFAMILY)	Yes	Yes	No	-
1356	Mcal_1356	isotig03474	147	No	I	-	TRANSMEMBRANE (PHOBIUS); NON_CYTOPLASMIC_DOMAIN (PHOBIUS); CYTOPLASMIC_DOMAIN (PHOBIUS); TMhelix (TMHMM)	No	No	No	-
1357	Mcal_1357	isotig03493	138	No	I	-	-	No	No	No	-
1358	Mcal_1358	isotig03498	138	No	I	P:GO:0055114; F:GO:0004313; F:GO:0016296; F:GO:0004320; F:GO:0016295; F:GO:0004316; F:GO:0004315; F:GO:0004319; F:GO:0004314; F:GO:0004317	IPR023102 (G3DSA:1.10.1470.GENE3D)	Yes	No	No	map01040 map00780 map00780 map00780 map00061 map00061 map00061 map00061 map00061
1359	Mcal_1359	isotig03508	136	No	I	-	-	No	No	No	-
1360	Mcal_1360	isotig03510	135	No	I	-	-	Yes	No	No	-
1361	Mcal_1361	isotig03518	132	No	I	-	-	Yes	No	No	-
1362	Mcal_1362	isotig03534	126	No	I	-	-	No	No	No	-
1363	Mcal_1363	isotig03542	124	No	I	-	-	No	No	No	-
1364	Mcal_1364	isotig03544	122	No	I	-	-	No	No	No	-
1365	Mcal_1365	isotig03546	118	No	I	-	-	No	No	No	-
1366	Mcal_1366	isotig03548	119	No	I	-	-	No	No	No	-
1367	Mcal_1367	isotig03553	117	No	I	-	-	No	No	No	-
1368	Mcal_1368	isotig03570	110	No	I	-	-	No	No	No	-
1369	Mcal_1369	isotig03571	107	No	I	-	-	No	No	No	-
1370	Mcal_1370	isotig03575	108	No	I	-	-	No	No	No	-
1371	Mcal_1371	isotig03594	104	No	I	-	-	No	No	No	-
1372	Mcal_1372	isotig03600	102	No	I	-	-	Yes	No	No	-
1373	Mcal_1373	Contig319.Newo100p95.cap3o60p95	510	No	V	-	-	No	No	No	-
1374	Mcal_1374	Contig330.Newo100p95.cap3o60p95	406	No	V	-	SignalP-TM (SIGNALP_GRAM_POSITIVE)	Yes	No	No	-
1375	Mcal_1375	Contig451.Newo100p95.cap3o60p95	487	No	V	P:GO:0009987; F:GO:0016787	-	Yes	No	No	-
1376	Mcal_1376	Contig48.Newo100p95.cap3o60p95	2126	No	V	P:GO:0006950; F:GO:0005524; F:GO:0032440; C:GO:0005634; P:GO:0055114	TRANSMEMBRANE (PHOBIUS); NON_CYTOPLASMIC_DOMAIN (PHOBIUS); CYTOPLASMIC_DOMAIN (PHOBIUS)	Yes	Yes	Yes	-
1377	Mcal_1377	Contig591.Newo100p95.cap3o60p95	1713	No	V	F:GO:0008061; P:GO:0006030; C:GO:0005576	IPR002557 (SMART); IPR002557 (PFAM); IPR002557 (G3DSA:2.170.140.GENE3D); PTHR22933 (PANTHER); SIGNAL_PEPTIDE_C_REGION (PHOBIUS); NON_CYTOPLASMIC_DOMAIN (PHOBIUS); SIGNAL_PEPTIDE (PHOBIUS); SIGNAL_PEPTIDE_H_REGION (PHOBIUS); SIGNAL_PEPTIDE_N_REGION (PHOBIUS); IPR002557 (PROSITE_PROFILES); SignalP-noTM (SIGNALP_EUK); IPR002557 (SUPERFAMILY)	Yes	No	No	-
1378	Mcal_1378	Contig638.Newo100p95.cap3o60p95	344	No	V	-	CYTOPLASMIC_DOMAIN (PHOBIUS); TRANSMEMBRANE (PHOBIUS); NON_CYTOPLASMIC_DOMAIN (PHOBIUS); TMhelix (TMHMM)	No	No	No	-
1379	Mcal_1379	Contig653.Newo100p95.cap3o60p95	613	No	V	F:GO:0098519	IPR004948 (PFAM); IPR027417 (G3DSA:3.40.50.GENE3D); PTHR20953 (PANTHER); IPR027417 (SUPERFAMILY)	Yes	No	No	-
1380	Mcal_1380	Contig665.Newo100p95.cap3o60p95	262	No	V	-	-	Yes	No	No	-
1381	Mcal_1381	Contig693.Newo100p95.cap3o60p95	1114	No	V	-	NON_CYTOPLASMIC_DOMAIN (PHOBIUS); TRANSMEMBRANE (PHOBIUS); TRANSMEMBRANE (PHOBIUS); CYTOPLASMIC_DOMAIN (PHOBIUS); CYTOPLASMIC_DOMAIN (PHOBIUS); TMhelix (TMHMM)	Yes	No	No	-
1382	Mcal_1382	isotig00452	1229	No	V	C:GO:0005622; P:GO:0006355; F:GO:0005515	IPR001132 (SMART); IPR001132 (PFAM); IPR017855 (G3DSA:2.60.200.GENE3D); PTHR22742 (PANTHER); IPR001132 (PROSITE_PROFILES); SignalP-TM (SIGNALP_GRAM_POSITIVE); IPR008984 (SUPERFAMILY)	Yes	Yes	No	-
1383	Mcal_1383	isotig00575	424	No	V	C:GO:0000275; F:GO:0046933; F:GO:0046961; P:GO:0015986	IPR006721 (PFAM); IPR006721 (G3DSA:1.10.1620.GENE3D); PTHR12448 (PANTHER); IPR006721 (SUPERFAMILY)	Yes	No	No	-
1384	Mcal_1384	isotig00579	362	No	V	-	-	No	No	No	-
1385	Mcal_1385	isotig00646	1338	No	V	F:GO:0005515	IPR019956 (PRINTS); IPR000626 (SMART); G3DSA:3.10.20.90 (GENE3D); IPR000626 (PFAM); G3DSA:3.10.20.90 (GENE3D); PTHR10666 (PANTHER); IPR019954 (PROSITE_PATTERNS); IPR019954 (PROSITE_PATTERNS); IPR019954 (PROSITE_PATTERNS); IPR019954 (PROSITE_PATTERNS); IPR000626 (PROSITE_PROFILES); IPR000626 (PROSITE_PROFILES); IPR000626 (PROSITE_PROFILES); IPR000626 (PROSITE_PROFILES); IPR029071 (SUPERFAMILY); IP…	Yes	Yes	Yes	-
1386	Mcal_1386	isotig00666	1198	No	V	F:GO:0005509	IPR002048 (SMART); IPR011992 (PFAM); IPR011992 (G3DSA:1.10.238.GENE3D); IPR011992 (G3DSA:1.10.238.GENE3D); IPR002048 (PFAM); IPR011992 (G3DSA:1.10.238.GENE3D); PTHR10827 (PANTHER); PTHR10827:SF44 (PANTHER); IPR018247 (PROSITE_PATTERNS); IPR018247 (PROSITE_PATTERNS); IPR018247 (PROSITE_PATTERNS); IPR018247 (PROSITE_PATTERNS); SIGNAL_PEPTIDE_N_REGION (PHOBIUS); NON_CYTOPLASMIC_DOMAIN (PHOBIUS); SIG…	Yes	Yes	No	-
1387	Mcal_1387	isotig00685	1113	No	V	P:GO:0051603; P:GO:0071353; P:GO:0030512; P:GO:0021680; C:GO:0030176; C:GO:0005793; P:GO:0043066; P:GO:0021589; C:GO:0005788; C:GO:0008180; P:GO:0031398; C:GO:0042470; F:GO:0043022; P:GO:0006983; C:GO:0009986; P:GO:0071236; F:GO:0019904; F:GO:0031625; P:GO:0006987; P:GO:0040019; F:GO:0051082; P:GO:0042149; C:GO:0030496; C:GO:0034663; F:GO:0051787; F:GO:0005524	Coil (COILS); IPR013126 (PRINTS); IPR029047 (G3DSA:2.60.34.GENE3D); G3DSA:3.30.420.40 (GENE3D); IPR013126 (PFAM); G3DSA:3.90.640.10 (GENE3D); G3DSA:3.30.420.40 (GENE3D); PTHR19375 (PANTHER); PTHR19375:SF157 (PANTHER); IPR018181 (PROSITE_PATTERNS); SSF53067 (SUPERFAMILY); IPR029047 (SUPERFAMILY)	Yes	Yes	Yes	-
1388	Mcal_1388	isotig00720	972	No	V	F:GO:0008270; F:GO:0003676; F:GO:0000166	-	Yes	Yes	No	-
1389	Mcal_1389	isotig00782	863	No	V	C:GO:0016020; C:GO:0005783	PTHR10281:SF1 (PANTHER); PTHR10281 (PANTHER); NON_CYTOPLASMIC_DOMAIN (PHOBIUS); TRANSMEMBRANE (PHOBIUS); CYTOPLASMIC_DOMAIN (PHOBIUS); NON_CYTOPLASMIC_DOMAIN (PHOBIUS); TRANSMEMBRANE (PHOBIUS); TMhelix (TMHMM); TMhelix (TMHMM)	Yes	No	No	-
1390	Mcal_1390	isotig00828	820	No	V	P:GO:0043651; P:GO:0033211; P:GO:0042178; C:GO:0016021; C:GO:0005789; C:GO:0005741; P:GO:0019432; P:GO:0044539; F:GO:0004467; P:GO:0014070; P:GO:0042493; P:GO:0035338; P:GO:0071902; P:GO:0036109; C:GO:0005886; P:GO:0034201; F:GO:0005524; P:GO:0007584; C:GO:0005778	PTHR24096:SF143 (PANTHER); PTHR24096 (PANTHER); SSF56801 (SUPERFAMILY)	Yes	No	Yes	map00071 map00061
1391	Mcal_1391	isotig00901	738	No	V	F:GO:0004185; P:GO:0006508	IPR029058 (G3DSA:3.40.50.GENE3D); IPR001563 (PFAM); IPR001563 (PANTHER); PTHR11802:SF24 (PANTHER); IPR029058 (SUPERFAMILY)	Yes	No	No	-
1392	Mcal_1392	isotig00943	699	No	V	-	-	Yes	Yes	No	-
1393	Mcal_1393	isotig00987	680	No	V	F:GO:0005215; C:GO:0016020; P:GO:0006810	IPR000425 (PRINTS); IPR023271 (G3DSA:1.20.1080.GENE3D); IPR000425 (PFAM); IPR000425 (PANTHER); PTHR19139:SF109 (PANTHER); CYTOPLASMIC_DOMAIN (PHOBIUS); CYTOPLASMIC_DOMAIN (PHOBIUS); TRANSMEMBRANE (PHOBIUS); NON_CYTOPLASMIC_DOMAIN (PHOBIUS); TRANSMEMBRANE (PHOBIUS); TRANSMEMBRANE (PHOBIUS); CYTOPLASMIC_DOMAIN (PHOBIUS); TRANSMEMBRANE (PHOBIUS); NON_CYTOPLASMIC_DOMAIN (PHOBIUS); IPR023271 (SUPERFAM…	Yes	No	No	-
1394	Mcal_1394	isotig01030	654	No	V	F:GO:0008430; C:GO:0030176; P:GO:0006886	Coil (COILS); IPR009703 (PFAM); CYTOPLASMIC_DOMAIN (PHOBIUS); NON_CYTOPLASMIC_DOMAIN (PHOBIUS); TRANSMEMBRANE (PHOBIUS); TMhelix (TMHMM)	Yes	No	No	-
1395	Mcal_1395	isotig01032	655	No	V	P:GO:0006457; P:GO:0006950; F:GO:0005524; F:GO:0051082	Coil (COILS); Coil (COILS); IPR013126 (PRINTS); IPR029048 (G3DSA:1.20.1270.GENE3D); IPR013126 (PFAM); IPR029047 (G3DSA:2.60.34.GENE3D); PTHR19375:SF173 (PANTHER); PTHR19375 (PANTHER); IPR029047 (SUPERFAMILY)	Yes	Yes	Yes	-
1396	Mcal_1396	isotig01185	587	No	V	F:GO:0016747; P:GO:0008152	IPR020616 (PFAM); IPR016038 (G3DSA:3.40.47.GENE3D); IPR016038 (G3DSA:3.40.47.GENE3D); PTHR18919:SF79 (PANTHER); PTHR18919 (PANTHER); IPR020615 (PROSITE_PATTERNS); IPR016039 (SUPERFAMILY)	Yes	No	Yes	-
1397	Mcal_1397	isotig01207	577	No	V	C:GO:0005737	Coil (COILS); IPR001623 (PRINTS); IPR001623 (SMART); IPR001623 (G3DSA:1.10.287.GENE3D); IPR001623 (PFAM); PTHR24077 (PANTHER); PTHR24077:SF225 (PANTHER); IPR018253 (PROSITE_PATTERNS); IPR001623 (PROSITE_PROFILES); IPR001623 (SUPERFAMILY)	Yes	Yes	No	-
1398	Mcal_1398	isotig01251	557	No	V	-	TMhelix (TMHMM)	Yes	Yes	No	-
1399	Mcal_1399	isotig01275	552	No	V	F:GO:0016779; F:GO:0003746; P:GO:0006414; P:GO:0006184; F:GO:0003924; C:GO:0005737; F:GO:0005525	-	Yes	Yes	Yes	-
1400	Mcal_1400	isotig01316	538	No	V	F:GO:0008999	IPR000182 (PFAM); IPR016181 (G3DSA:3.40.630.GENE3D); PTHR23091 (PANTHER); PTHR23091:SF179 (PANTHER); IPR000182 (PROSITE_PROFILES); IPR016181 (SUPERFAMILY)	Yes	Yes	No	-
1401	Mcal_1401	isotig01363	530	No	V	P:GO:0030433; P:GO:0044763; P:GO:0006457; C:GO:0016020; C:GO:0044432; F:GO:0051082; P:GO:0006950; F:GO:0005524	IPR001404 (PFAM); IPR001404 (PANTHER); SSF110942 (SUPERFAMILY); IPR020568 (SUPERFAMILY)	Yes	No	Yes	-
1402	Mcal_1402	isotig01426	511	No	V	C:GO:0005737; C:GO:0005839; C:GO:0005634; F:GO:0004298; P:GO:0051603	IPR029055 (G3DSA:3.60.20.GENE3D); IPR001353 (PFAM); PTHR11599:SF42 (PANTHER); PTHR11599 (PANTHER); IPR029055 (SUPERFAMILY); TMhelix (TMHMM)	Yes	Yes	Yes	-
1403	Mcal_1403	isotig01448	505	No	V	-	-	No	No	No	-
1404	Mcal_1404	isotig01461	503	No	V	C:GO:0005786; P:GO:0045900; F:GO:0008312; P:GO:0006614	-	Yes	No	No	-
1405	Mcal_1405	isotig01491	501	No	V	C:GO:0005737; P:GO:0006950; F:GO:0005524; P:GO:0042026	IPR002423 (PFAM); IPR027413 (G3DSA:1.10.560.GENE3D); IPR002423 (PANTHER); PTHR11353:SF75 (PANTHER); IPR002423 (SUPERFAMILY)	Yes	No	No	-
1406	Mcal_1406	isotig01613	477	No	V	-	SIGNAL_PEPTIDE_N_REGION (PHOBIUS); SIGNAL_PEPTIDE (PHOBIUS); SIGNAL_PEPTIDE_C_REGION (PHOBIUS); SIGNAL_PEPTIDE_H_REGION (PHOBIUS); NON_CYTOPLASMIC_DOMAIN (PHOBIUS)	Yes	No	No	-
1407	Mcal_1407	isotig01644	475	No	V	F:GO:0016874; P:GO:0008152	G3DSA:3.40.50.980 (GENE3D); IPR000873 (PFAM); PTHR24096:SF143 (PANTHER); PTHR24096 (PANTHER); SSF56801 (SUPERFAMILY)	Yes	No	Yes	-
1408	Mcal_1408	isotig01670	471	No	V	-	IPR009738 (PFAM)	Yes	No	No	-
1409	Mcal_1409	isotig01691	468	No	V	C:GO:0005885; P:GO:0034314	IPR008384 (PFAM); G3DSA:3.30.1460.20 (GENE3D); IPR008384 (PANTHER); SSF69645 (SUPERFAMILY)	Yes	No	No	-
1410	Mcal_1410	isotig01706	463	No	V	C:GO:0016021	-	Yes	No	No	-
1411	Mcal_1411	isotig01714	459	No	V	-	NON_CYTOPLASMIC_DOMAIN (PHOBIUS); TRANSMEMBRANE (PHOBIUS); CYTOPLASMIC_DOMAIN (PHOBIUS); TMhelix (TMHMM)	No	No	No	-
1412	Mcal_1412	isotig01749	460	No	V	F:GO:0016905; F:GO:0005515	IPR001680 (SMART); IPR015943 (G3DSA:2.130.10.GENE3D); PTHR10971 (PANTHER); PTHR10971:SF11 (PANTHER); IPR001680 (PROSITE_PROFILES); IPR017986 (SUPERFAMILY)	Yes	Yes	Yes	-
1413	Mcal_1413	isotig01854	447	No	V	F:GO:0080019	IPR016040 (G3DSA:3.40.50.GENE3D); IPR013120 (PFAM); IPR026055 (PANTHER); PTHR11011:SF26 (PANTHER)	Yes	No	No	-
1414	Mcal_1414	isotig01983	435	No	V	-	-	No	No	No	-
1415	Mcal_1415	isotig02061	424	No	V	F:GO:0008270; F:GO:0003939; P:GO:0055114	IPR011032 (G3DSA:3.90.180.GENE3D); IPR013154 (PFAM); PTHR11695:SF451 (PANTHER); IPR002085 (PANTHER); IPR002328 (PROSITE_PATTERNS); IPR011032 (SUPERFAMILY)	Yes	No	No	map00051 map00040
1416	Mcal_1416	isotig02135	417	No	V	-	-	No	No	No	-
1417	Mcal_1417	isotig02200	410	No	V	-	CYTOPLASMIC_DOMAIN (PHOBIUS); NON_CYTOPLASMIC_DOMAIN (PHOBIUS); TRANSMEMBRANE (PHOBIUS); TMhelix (TMHMM)	Yes	No	No	-
1418	Mcal_1418	isotig02296	399	No	V	F:GO:0005515	IPR002110 (SMART); IPR020683 (PFAM); IPR020683 (G3DSA:1.25.40.GENE3D); PTHR24124 (PANTHER); IPR002110 (PROSITE_PROFILES); IPR020683 (PROSITE_PROFILES); IPR002110 (PROSITE_PROFILES); IPR002110 (PROSITE_PROFILES); IPR020683 (SUPERFAMILY)	Yes	Yes	No	-
1419	Mcal_1419	isotig02350	395	No	V	F:GO:0046872	PTHR12681 (PANTHER); IPR000571 (PROSITE_PROFILES)	Yes	No	No	-
1420	Mcal_1420	isotig02432	386	No	V	F:GO:0005509	Coil (COILS); PTHR13025 (PANTHER)	Yes	No	No	-
1421	Mcal_1421	isotig02487	380	No	V	F:GO:0008080	-	Yes	No	No	-
1422	Mcal_1422	isotig02598	367	No	V	F:GO:0051537; C:GO:0043231	IPR006622 (SMART); IPR018967 (PFAM); PTHR13680 (PANTHER)	Yes	Yes	No	-
1423	Mcal_1423	isotig02618	359	No	V	P:GO:0042981	-	Yes	No	No	-
1424	Mcal_1424	isotig02669	354	No	V	C:GO:0044464	PTHR23422:SF10 (PANTHER); PTHR23422 (PANTHER)	Yes	No	No	-
1425	Mcal_1425	isotig02670	359	No	V	F:GO:0005515	Coil (COILS); Coil (COILS); G3DSA:1.20.5.110 (GENE3D); PF12352 (PFAM); PTHR19305 (PANTHER); IPR000727 (PROSITE_PROFILES); SSF58038 (SUPERFAMILY)	Yes	No	No	-
1426	Mcal_1426	isotig02798	341	No	V	-	-	Yes	Yes	Yes	-
1427	Mcal_1427	isotig02852	332	No	V	-	-	No	No	No	-
1428	Mcal_1428	isotig03043	292	No	V	P:GO:0006081; F:GO:0004028; P:GO:0055114	IPR016163 (G3DSA:3.40.309.GENE3D); IPR015590 (PFAM); PTHR11699 (PANTHER); IPR015657 (PTHR11699:PANTHER); IPR016161 (SUPERFAMILY)	Yes	No	Yes	-
1429	Mcal_1429	isotig03092	288	No	V	-	-	No	No	No	-
1430	Mcal_1430	isotig03276	224	No	V	-	TRANSMEMBRANE (PHOBIUS); NON_CYTOPLASMIC_DOMAIN (PHOBIUS); CYTOPLASMIC_DOMAIN (PHOBIUS); TMhelix (TMHMM)	No	No	No	-
1431	Mcal_1431	isotig03408	172	No	V	-	-	No	No	No	-
1432	Mcal_1432	isotig03563	111	No	V	-	-	No	No	No	-
1433	Mcal_1433	Contig1.Newo100p95.cap3o60p95	2142	No	IV	F:GO:0005507; C:GO:0005615; F:GO:0031404; F:GO:0005344; F:GO:0016491; P:GO:0015671; P:GO:0055114	IPR005203 (PFAM); IPR008922 (G3DSA:1.10.1280.GENE3D); IPR005203 (G3DSA:2.60.40.GENE3D); IPR000896 (PFAM); IPR013788 (PANTHER); PTHR11511:SF24 (PANTHER); IPR002227 (PROSITE_PATTERNS); IPR013788 (PROSITE_PATTERNS); SignalP-noTM (SIGNALP_EUK); IPR014756 (SUPERFAMILY); IPR008922 (SUPERFAMILY)	Yes	No	No	-
1434	Mcal_1434	Contig1000.Newo100p95.cap3o60p95	719	No	IV	-	Coil (COILS)	No	No	No	-
1435	Mcal_1435	Contig1001.Newo100p95.cap3o60p95	914	No	IV	C:GO:0005840; F:GO:0003735; P:GO:0006412	IPR000554 (PFAM); IPR000554 (PANTHER); PTHR11278:SF0 (PANTHER)	Yes	No	Yes	-
1436	Mcal_1436	Contig1003.Newo100p95.cap3o60p95	421	No	IV	-	-	No	No	No	-
1437	Mcal_1437	Contig1005.Newo100p95.cap3o60p95	532	No	IV	-	CYTOPLASMIC_DOMAIN (PHOBIUS); NON_CYTOPLASMIC_DOMAIN (PHOBIUS); TRANSMEMBRANE (PHOBIUS); TMhelix (TMHMM)	No	No	No	-
1438	Mcal_1438	Contig1006.Newo100p95.cap3o60p95	1032	No	IV	-	SIGNAL_PEPTIDE_N_REGION (PHOBIUS); SIGNAL_PEPTIDE (PHOBIUS); SIGNAL_PEPTIDE_C_REGION (PHOBIUS); NON_CYTOPLASMIC_DOMAIN (PHOBIUS); SIGNAL_PEPTIDE_H_REGION (PHOBIUS); SignalP-TM (SIGNALP_GRAM_POSITIVE); SignalP-noTM (SIGNALP_EUK); TMhelix (TMHMM)	No	No	No	-
1439	Mcal_1439	Contig1012.Newo100p95.cap3o60p95	836	No	IV	-	SIGNAL_PEPTIDE_N_REGION (PHOBIUS); TRANSMEMBRANE (PHOBIUS); SIGNAL_PEPTIDE_H_REGION (PHOBIUS); CYTOPLASMIC_DOMAIN (PHOBIUS); SIGNAL_PEPTIDE_C_REGION (PHOBIUS); CYTOPLASMIC_DOMAIN (PHOBIUS); NON_CYTOPLASMIC_DOMAIN (PHOBIUS); NON_CYTOPLASMIC_DOMAIN (PHOBIUS); SIGNAL_PEPTIDE (PHOBIUS); TRANSMEMBRANE (PHOBIUS); TRANSMEMBRANE (PHOBIUS); TMhelix (TMHMM); TMhelix (TMHMM); TMhelix (TMHMM)	Yes	No	No	-
1440	Mcal_1440	Contig1013.Newo100p95.cap3o60p95	407	No	IV	-	-	No	No	No	-
1441	Mcal_1441	Contig1015.Newo100p95.cap3o60p95	652	No	IV	F:GO:0005507; C:GO:0005615; F:GO:0031404; F:GO:0005344; F:GO:0016491; P:GO:0015671; P:GO:0055114	SIGNAL_PEPTIDE_H_REGION (PHOBIUS); NON_CYTOPLASMIC_DOMAIN (PHOBIUS); SIGNAL_PEPTIDE (PHOBIUS); SIGNAL_PEPTIDE_N_REGION (PHOBIUS); SIGNAL_PEPTIDE_C_REGION (PHOBIUS)	Yes	No	No	-
1442	Mcal_1442	Contig1017.Newo100p95.cap3o60p95	1194	No	IV	F:GO:0005509	IPR011992 (G3DSA:1.10.238.GENE3D); IPR011992 (G3DSA:1.10.238.GENE3D); PTHR23048:SF6 (PANTHER); PTHR23048 (PANTHER); IPR002048 (PROSITE_PROFILES); IPR002048 (PROSITE_PROFILES); SSF47473 (SUPERFAMILY)	Yes	Yes	No	-
1443	Mcal_1443	Contig1018.Newo100p95.cap3o60p95	812	No	IV	F:GO:0005524; C:GO:0005737; C:GO:0005856; F:GO:0000166	IPR004000 (PRINTS); IPR004000 (PFAM); G3DSA:3.30.420.40 (GENE3D); PTHR11937:SF162 (PANTHER); IPR004000 (PANTHER); IPR020902 (PROSITE_PATTERNS); SSF53067 (SUPERFAMILY)	Yes	Yes	Yes	-
1444	Mcal_1444	Contig1022.Newo100p95.cap3o60p95	357	No	IV	-	-	No	No	No	-
1445	Mcal_1445	Contig1023.Newo100p95.cap3o60p95	315	No	IV	-	Coil (COILS); IPR000533 (PFAM); SSF57997 (SUPERFAMILY)	Yes	No	No	-
1446	Mcal_1446	Contig1024.Newo100p95.cap3o60p95	604	No	IV	-	-	Yes	No	No	-
1447	Mcal_1447	Contig1027.Newo100p95.cap3o60p95	623	No	IV	P:GO:0016042; F:GO:0005509; F:GO:0004623; P:GO:0006644	IPR001211 (PRINTS); IPR016090 (SMART); IPR016090 (PFAM); IPR016090 (G3DSA:1.20.90.GENE3D); IPR001211 (PANTHER); PTHR11716:SF37 (PANTHER); IPR013090 (PROSITE_PATTERNS); IPR013090 (PROSITE_PATTERNS); IPR016090 (SUPERFAMILY)	Yes	No	No	map00592 map00591 map00590 map00565 map00564
1448	Mcal_1448	Contig103.Newo100p95.cap3o60p95	1180	No	IV	F:GO:0005215; C:GO:0005622; P:GO:0006810	IPR001071 (PRINTS); IPR001251 (SMART); IPR011074 (SMART); IPR001251 (G3DSA:3.40.525.GENE3D); IPR011074 (PFAM); IPR001251 (PFAM); PTHR10174 (PANTHER); IPR001251 (PROSITE_PROFILES); IPR001251 (SUPERFAMILY); IPR011074 (SUPERFAMILY)	Yes	No	No	-
1449	Mcal_1449	Contig1033.Newo100p95.cap3o60p95	516	No	IV	-	-	No	No	No	-
1450	Mcal_1450	Contig1039.Newo100p95.cap3o60p95	404	No	IV	-	SIGNAL_PEPTIDE_N_REGION (PHOBIUS); SIGNAL_PEPTIDE_H_REGION (PHOBIUS); SIGNAL_PEPTIDE (PHOBIUS); SIGNAL_PEPTIDE_C_REGION (PHOBIUS); NON_CYTOPLASMIC_DOMAIN (PHOBIUS); SignalP-noTM (SIGNALP_EUK)	Yes	No	No	-
1451	Mcal_1451	Contig104.Newo100p95.cap3o60p95	940	No	IV	F:GO:0005215; C:GO:0005622; P:GO:0006810	IPR001071 (PRINTS); IPR001251 (PFAM); IPR001251 (G3DSA:3.40.525.GENE3D); PTHR10174:SF110 (PANTHER); PTHR10174 (PANTHER); IPR001251 (PROSITE_PROFILES); IPR001251 (SUPERFAMILY)	Yes	No	No	-
1452	Mcal_1452	Contig106.Newo100p95.cap3o60p95	819	No	IV	C:GO:0005840; F:GO:0003735; P:GO:0016310; F:GO:0047323; F:GO:0005524; P:GO:0006412	IPR005824 (SMART); IPR001141 (PFAM); IPR014722 (G3DSA:2.30.30.GENE3D); IPR005824 (PFAM); PTHR10497:SF0 (PANTHER); IPR001141 (PANTHER); IPR008991 (SUPERFAMILY)	Yes	Yes	Yes	-
1453	Mcal_1453	Contig110.Newo100p95.cap3o60p95	956	No	IV	C:GO:0005840	IPR012988 (PFAM); IPR016082 (PFAM); IPR016082 (G3DSA:3.30.1390.GENE3D); IPR005998 (TIGRFAM); PTHR11524 (PANTHER); IPR016082 (SUPERFAMILY)	Yes	Yes	No	-
1454	Mcal_1454	Contig113.Newo100p95.cap3o60p95	1930	No	IV	F:GO:0004104	IPR000997 (PRINTS); IPR029058 (G3DSA:3.40.50.GENE3D); IPR002018 (PFAM); PTHR11559:SF154 (PANTHER); PTHR11559 (PANTHER); IPR019819 (PROSITE_PATTERNS); IPR029058 (SUPERFAMILY)	Yes	No	No	-
1455	Mcal_1455	Contig117.Newo100p95.cap3o60p95	1374	No	IV	C:GO:0005840; F:GO:0003735; P:GO:0006412; F:GO:0019843	IPR002942 (SMART); IPR000876 (PIRSF); IPR005824 (SMART); IPR013845 (PFAM); IPR013843 (PFAM); IPR005824 (PFAM); IPR002942 (PFAM); IPR000876 (PANTHER); IPR018199 (PROSITE_PATTERNS); IPR000876 (HAMAP); IPR002942 (PROSITE_PROFILES); SSF55174 (SUPERFAMILY)	Yes	No	No	-
1456	Mcal_1456	Contig119.Newo100p95.cap3o60p95	1099	No	IV	P:GO:0044237; F:GO:0050662; F:GO:0003978; P:GO:0006012	IPR016040 (G3DSA:3.40.50.GENE3D); IPR001509 (PFAM); PTHR10366 (PANTHER); IPR005886 (PTHR10366:PANTHER); SSF51735 (SUPERFAMILY)	Yes	No	No	map00520 map00052
1457	Mcal_1457	Contig122.Newo100p95.cap3o60p95	1321	No	IV	-	Coil (COILS); SIGNAL_PEPTIDE_C_REGION (PHOBIUS); SIGNAL_PEPTIDE_N_REGION (PHOBIUS); SIGNAL_PEPTIDE (PHOBIUS); SIGNAL_PEPTIDE_H_REGION (PHOBIUS); NON_CYTOPLASMIC_DOMAIN (PHOBIUS); SignalP-noTM (SIGNALP_EUK)	Yes	No	No	-
1458	Mcal_1458	Contig123.Newo100p95.cap3o60p95	1104	No	IV	-	-	Yes	No	No	-
1459	Mcal_1459	Contig124.Newo100p95.cap3o60p95	1962	No	IV	F:GO:0003998; F:GO:0016787	TRANSMEMBRANE (PHOBIUS); TRANSMEMBRANE (PHOBIUS); CYTOPLASMIC_DOMAIN (PHOBIUS); NON_CYTOPLASMIC_DOMAIN (PHOBIUS); NON_CYTOPLASMIC_DOMAIN (PHOBIUS); TMhelix (TMHMM); TMhelix (TMHMM)	Yes	Yes	No	map00627 map00620
1460	Mcal_1460	Contig126.Newo100p95.cap3o60p95	759	No	IV	-	Coil (COILS); CYTOPLASMIC_DOMAIN (PHOBIUS); TRANSMEMBRANE (PHOBIUS); NON_CYTOPLASMIC_DOMAIN (PHOBIUS)	No	No	No	-
1461	Mcal_1461	Contig127.Newo100p95.cap3o60p95	812	No	IV	P:GO:0006629; F:GO:0016717; C:GO:0016020	-	Yes	No	No	-
1462	Mcal_1462	Contig128.Newo100p95.cap3o60p95	1716	No	IV	F:GO:0003779; P:GO:0031032; F:GO:0005509	IPR003096 (PRINTS); IPR001997 (PRINTS); IPR002048 (SMART); IPR001715 (SMART); IPR001715 (PFAM); IPR001715 (G3DSA:1.10.418.GENE3D); IPR011992 (G3DSA:1.10.238.GENE3D); IPR011992 (PFAM); IPR000557 (PFAM); PTHR18959 (PANTHER); IPR000557 (PROSITE_PATTERNS); IPR018247 (PROSITE_PATTERNS); IPR000557 (PROSITE_PROFILES); IPR002048 (PROSITE_PROFILES); IPR002048 (PROSITE_PROFILES); IPR001715 (PROSITE_PROFILE…	Yes	Yes	Yes	-
1463	Mcal_1463	Contig129.Newo100p95.cap3o60p95	1038	No	IV	P:GO:0006879; F:GO:0016491; F:GO:0008199; P:GO:0006826; P:GO:0055114	CYTOPLASMIC_DOMAIN (PHOBIUS); TRANSMEMBRANE (PHOBIUS); CYTOPLASMIC_DOMAIN (PHOBIUS); NON_CYTOPLASMIC_DOMAIN (PHOBIUS); TRANSMEMBRANE (PHOBIUS)	Yes	No	No	-
1464	Mcal_1464	Contig130.Newo100p95.cap3o60p95	3029	No	IV	C:GO:0005737; P:GO:0016310; F:GO:0005524; F:GO:0004054	IPR014746 (G3DSA:3.30.590.GENE3D); IPR022413 (PFAM); IPR022414 (PFAM); IPR022413 (G3DSA:1.10.135.GENE3D); PTHR11547 (PANTHER); IPR022415 (PROSITE_PATTERNS); IPR022414 (PROSITE_PROFILES); IPR022413 (PROSITE_PROFILES); SSF55931 (SUPERFAMILY); IPR022413 (SUPERFAMILY)	Yes	No	No	map00330
1465	Mcal_1465	Contig131.Newo100p95.cap3o60p95	792	No	IV	-	SIGNAL_PEPTIDE_N_REGION (PHOBIUS); NON_CYTOPLASMIC_DOMAIN (PHOBIUS); SIGNAL_PEPTIDE (PHOBIUS); SIGNAL_PEPTIDE_C_REGION (PHOBIUS); SIGNAL_PEPTIDE_H_REGION (PHOBIUS)	Yes	No	No	-
1466	Mcal_1466	Contig132.Newo100p95.cap3o60p95	696	No	IV	P:GO:0071704; F:GO:0016787; P:GO:0044710; C:GO:0016020	IPR010736 (PFAM)	Yes	No	No	-
1467	Mcal_1467	Contig135.Newo100p95.cap3o60p95	609	No	IV	C:GO:0005840; F:GO:0003735; P:GO:0006412	IPR020784 (PFAM); IPR020784 (G3DSA:3.30.1550.GENE3D); IPR000911 (PANTHER); IPR020784 (SUPERFAMILY)	Yes	No	No	-
1468	Mcal_1468	Contig137.Newo100p95.cap3o60p95	1048	No	IV	-	SIGNAL_PEPTIDE_N_REGION (PHOBIUS); NON_CYTOPLASMIC_DOMAIN (PHOBIUS); SIGNAL_PEPTIDE_C_REGION (PHOBIUS); SIGNAL_PEPTIDE (PHOBIUS); SIGNAL_PEPTIDE_H_REGION (PHOBIUS); PS51257 (PROSITE_PROFILES); SignalP-noTM (SIGNALP_GRAM_NEGATIVE); SignalP-TM (SIGNALP_GRAM_POSITIVE); SignalP-noTM (SIGNALP_EUK)	Yes	No	No	-
1469	Mcal_1469	Contig138.Newo100p95.cap3o60p95	368	No	IV	-	-	Yes	No	No	-
1470	Mcal_1470	Contig139.Newo100p95.cap3o60p95	1489	No	IV	F:GO:0042302	IPR000618 (PRINTS); IPR000618 (PFAM); PTHR10380 (PANTHER); PTHR10380:SF120 (PANTHER); IPR000618 (PROSITE_PATTERNS); CYTOPLASMIC_DOMAIN (PHOBIUS); TRANSMEMBRANE (PHOBIUS); NON_CYTOPLASMIC_DOMAIN (PHOBIUS); IPR000618 (PROSITE_PROFILES); TMhelix (TMHMM); TMhelix (TMHMM)	Yes	Yes	No	-
1471	Mcal_1471	Contig142.Newo100p95.cap3o60p95	3053	No	IV	F:GO:0005388; C:GO:0016021; F:GO:0046872; F:GO:0005524; P:GO:0006816; C:GO:0033017	IPR001757 (PRINTS); IPR001757 (PRINTS); IPR001757 (TIGRFAM); IPR006068 (PFAM); IPR023298 (G3DSA:1.20.1110.GENE3D); IPR023214 (PFAM); PTHR24093:SF258 (PANTHER); PTHR24093 (PANTHER); CYTOPLASMIC_DOMAIN (PHOBIUS); TRANSMEMBRANE (PHOBIUS); CYTOPLASMIC_DOMAIN (PHOBIUS); TRANSMEMBRANE (PHOBIUS); CYTOPLASMIC_DOMAIN (PHOBIUS); NON_CYTOPLASMIC_DOMAIN (PHOBIUS); TRANSMEMBRANE (PHOBIUS); TRANSMEMBRANE (PHOB…	Yes	Yes	Yes	-
1472	Mcal_1472	Contig143.Newo100p95.cap3o60p95	1693	No	IV	C:GO:0005576; P:GO:0006030; F:GO:0008061	IPR002557 (SMART); IPR002557 (PFAM); IPR002557 (G3DSA:2.170.140.GENE3D); PTHR22933 (PANTHER); CYTOPLASMIC_DOMAIN (PHOBIUS); TRANSMEMBRANE (PHOBIUS); NON_CYTOPLASMIC_DOMAIN (PHOBIUS); IPR002557 (PROSITE_PROFILES); IPR002557 (SUPERFAMILY); TMhelix (TMHMM)	Yes	No	No	-
1473	Mcal_1473	Contig149.Newo100p95.cap3o60p95	1448	No	IV	F:GO:0005509	IPR002048 (SMART); IPR002048 (PFAM); IPR011992 (G3DSA:1.10.238.GENE3D); PTHR23049 (PANTHER); IPR018247 (PROSITE_PATTERNS); IPR002048 (PROSITE_PROFILES); IPR002048 (PROSITE_PROFILES); SSF47473 (SUPERFAMILY)	Yes	Yes	No	-
1474	Mcal_1474	Contig150.Newo100p95.cap3o60p95	1336	No	IV	F:GO:0016491; P:GO:0008152	IPR002198 (PRINTS); IPR002347 (PRINTS); IPR016040 (G3DSA:3.40.50.GENE3D); IPR002198 (PFAM); PTHR24316:SF215 (PANTHER); PTHR24316 (PANTHER); IPR020904 (PROSITE_PATTERNS); NON_CYTOPLASMIC_DOMAIN (PHOBIUS); TRANSMEMBRANE (PHOBIUS); CYTOPLASMIC_DOMAIN (PHOBIUS); CYTOPLASMIC_DOMAIN (PHOBIUS); TRANSMEMBRANE (PHOBIUS); SSF51735 (SUPERFAMILY); TMhelix (TMHMM)	Yes	Yes	No	-
1475	Mcal_1475	Contig157.Newo100p95.cap3o60p95	1022	No	IV	F:GO:0004364; P:GO:0008152	-	Yes	No	No	map00982 map00980 map00480
1476	Mcal_1476	Contig158.Newo100p95.cap3o60p95	1190	No	IV	P:GO:0009060; C:GO:0005743; C:GO:0070469; F:GO:0009055; F:GO:0005506; P:GO:0006119; F:GO:0020037; C:GO:0016021; P:GO:0022900; F:GO:0004129	IPR000883 (PRINTS); IPR023616 (G3DSA:1.20.210.GENE3D); IPR000883 (PFAM); IPR000883 (PANTHER); PTHR10422:SF18 (PANTHER); TRANSMEMBRANE (PHOBIUS); NON_CYTOPLASMIC_DOMAIN (PHOBIUS); CYTOPLASMIC_DOMAIN (PHOBIUS); TRANSMEMBRANE (PHOBIUS); NON_CYTOPLASMIC_DOMAIN (PHOBIUS); IPR023616 (PROSITE_PROFILES); IPR023616 (SUPERFAMILY); TMhelix (TMHMM); TMhelix (TMHMM)	Yes	No	No	map00190
1477	Mcal_1477	Contig159.Newo100p95.cap3o60p95	1318	No	IV	-	-	Yes	No	No	-
1478	Mcal_1478	Contig160.Newo100p95.cap3o60p95	1409	No	IV	F:GO:0005515	PR00014 (PRINTS); IPR003961 (SMART); IPR013783 (G3DSA:2.60.40.GENE3D); IPR013783 (G3DSA:2.60.40.GENE3D); IPR003961 (PFAM); PTHR19900 (PANTHER); IPR003961 (PROSITE_PROFILES); IPR003961 (PROSITE_PROFILES); IPR003961 (SUPERFAMILY)	Yes	No	No	-
1479	Mcal_1479	Contig161.Newo100p95.cap3o60p95	1111	No	IV	-	-	Yes	No	No	-
1480	Mcal_1480	Contig162.Newo100p95.cap3o60p95	903	No	IV	-	-	Yes	No	No	-
1481	Mcal_1481	Contig164.Newo100p95.cap3o60p95	878	No	IV	-	-	No	No	No	-
1482	Mcal_1482	Contig165.Newo100p95.cap3o60p95	1080	No	IV	C:GO:0005737; F:GO:0004801; P:GO:0006098	-	Yes	Yes	Yes	map00030
1483	Mcal_1483	Contig171.Newo100p95.cap3o60p95	1078	No	IV	P:GO:0006184; F:GO:0003924; P:GO:0051258; F:GO:0005525; C:GO:0005874; P:GO:0007017	IPR018316 (SMART); IPR003008 (G3DSA:3.40.50.GENE3D); IPR018316 (G3DSA:3.30.1330.GENE3D); IPR018316 (PFAM); IPR000217 (PANTHER); CYTOPLASMIC_DOMAIN (PHOBIUS); TRANSMEMBRANE (PHOBIUS); NON_CYTOPLASMIC_DOMAIN (PHOBIUS); IPR008280 (SUPERFAMILY)	Yes	Yes	Yes	-
1484	Mcal_1484	Contig176.Newo100p95.cap3o60p95	1195	No	IV	-	IPR003172 (SMART); IPR003172 (G3DSA:2.60.40.GENE3D); IPR003172 (PFAM); PTHR11306 (PANTHER); CYTOPLASMIC_DOMAIN (PHOBIUS); TRANSMEMBRANE (PHOBIUS); NON_CYTOPLASMIC_DOMAIN (PHOBIUS); IPR014756 (SUPERFAMILY); TMhelix (TMHMM)	Yes	No	No	-
1485	Mcal_1485	Contig177.Newo100p95.cap3o60p95	1032	No	IV	F:GO:0005488	TRANSMEMBRANE (PHOBIUS); CYTOPLASMIC_DOMAIN (PHOBIUS); NON_CYTOPLASMIC_DOMAIN (PHOBIUS); IPR016024 (SUPERFAMILY)	No	No	No	-
1486	Mcal_1486	Contig183.Newo100p95.cap3o60p95	1315	No	IV	F:GO:0004888; C:GO:0016021; F:GO:0004930; C:GO:0016020; P:GO:0007166; P:GO:0007186	SSF90188 (SUPERFAMILY)	Yes	No	No	-
1487	Mcal_1487	Contig185.Newo100p95.cap3o60p95	807	No	IV	C:GO:0005840; F:GO:0003735; P:GO:0006412	IPR001780 (PFAM); PTHR10902:SF0 (PANTHER); IPR001780 (PANTHER); IPR009000 (SUPERFAMILY)	Yes	No	No	-
1488	Mcal_1488	Contig186.Newo100p95.cap3o60p95	889	No	IV	P:GO:0006633; F:GO:0004768; F:GO:0005506; C:GO:0016021; C:GO:0005783; P:GO:0055114	TRANSMEMBRANE (PHOBIUS); TRANSMEMBRANE (PHOBIUS); CYTOPLASMIC_DOMAIN (PHOBIUS); NON_CYTOPLASMIC_DOMAIN (PHOBIUS); NON_CYTOPLASMIC_DOMAIN (PHOBIUS); TMhelix (TMHMM)	Yes	No	No	map01040
1489	Mcal_1489	Contig187.Newo100p95.cap3o60p95	661	No	IV	-	-	Yes	No	No	-
1490	Mcal_1490	Contig188.Newo100p95.cap3o60p95	1048	No	IV	-	-	Yes	No	No	-
1491	Mcal_1491	Contig190.Newo100p95.cap3o60p95	658	No	IV	-	SIGNAL_PEPTIDE_N_REGION (PHOBIUS); SIGNAL_PEPTIDE_C_REGION (PHOBIUS); NON_CYTOPLASMIC_DOMAIN (PHOBIUS); SIGNAL_PEPTIDE (PHOBIUS); SIGNAL_PEPTIDE_H_REGION (PHOBIUS); SignalP-TM (SIGNALP_GRAM_POSITIVE); SignalP-noTM (SIGNALP_GRAM_NEGATIVE)	No	No	No	-
1492	Mcal_1492	Contig193.Newo100p95.cap3o60p95	634	No	IV	F:GO:0046872; F:GO:0016491; C:GO:0070469; F:GO:0009055; C:GO:0016021; P:GO:0022904; C:GO:0005739	IPR027387 (G3DSA:1.20.810.GENE3D); IPR005798 (PFAM); TRANSMEMBRANE (PHOBIUS); NON_CYTOPLASMIC_DOMAIN (PHOBIUS); TRANSMEMBRANE (PHOBIUS); NON_CYTOPLASMIC_DOMAIN (PHOBIUS); CYTOPLASMIC_DOMAIN (PHOBIUS); IPR005798 (PROSITE_PROFILES); IPR005798 (SUPERFAMILY); TMhelix (TMHMM); TMhelix (TMHMM)	Yes	No	No	-
1493	Mcal_1493	Contig196.Newo100p95.cap3o60p95	819	No	IV	C:GO:0005840; F:GO:0003735; P:GO:0006412	IPR001780 (PFAM); IPR001780 (PANTHER); PTHR10902:SF0 (PANTHER); IPR018266 (PROSITE_PATTERNS); IPR009000 (SUPERFAMILY)	Yes	No	No	-
1494	Mcal_1494	Contig197.Newo100p95.cap3o60p95	669	No	IV	C:GO:0005874; P:GO:0051258; P:GO:0006184; P:GO:0007017; F:GO:0003924; F:GO:0005200; C:GO:0005737; F:GO:0005525	IPR002452 (PRINTS); IPR018316 (SMART); IPR023123 (G3DSA:1.10.287.GENE3D); IPR018316 (G3DSA:3.30.1330.GENE3D); IPR018316 (PFAM); PTHR11588:SF65 (PANTHER); IPR000217 (PANTHER); IPR008280 (SUPERFAMILY)	Yes	Yes	Yes	-
1495	Mcal_1495	Contig198.Newo100p95.cap3o60p95	1736	No	IV	C:GO:0005840; F:GO:0003735; P:GO:0006412	IPR002171 (PIRSF); IPR022666 (PFAM); IPR012340 (G3DSA:2.40.50.GENE3D); IPR022669 (PFAM); IPR014722 (G3DSA:2.30.30.GENE3D); IPR014726 (G3DSA:4.10.950.GENE3D); IPR002171 (PANTHER); PTHR13691:SF16 (PANTHER); IPR022671 (PROSITE_PATTERNS); IPR012340 (SUPERFAMILY); IPR008991 (SUPERFAMILY)	Yes	No	Yes	-
1496	Mcal_1496	Contig204.Newo100p95.cap3o60p95	603	No	IV	-	-	No	No	No	-
1497	Mcal_1497	Contig206.Newo100p95.cap3o60p95	623	No	IV	-	-	No	No	No	-
1498	Mcal_1498	Contig207.Newo100p95.cap3o60p95	1111	No	IV	C:GO:0005840; F:GO:0003735; P:GO:0006412	IPR001971 (PIRSF); IPR001971 (G3DSA:3.30.420.GENE3D); IPR001971 (PFAM); IPR001971 (PANTHER); IPR018102 (PROSITE_PATTERNS); IPR001971 (HAMAP); SSF53137 (SUPERFAMILY)	Yes	Yes	Yes	-
1499	Mcal_1499	Contig208.Newo100p95.cap3o60p95	587	No	IV	C:GO:0016020	PTHR15371 (PANTHER); PTHR15371:SF0 (PANTHER); CYTOPLASMIC_DOMAIN (PHOBIUS); TRANSMEMBRANE (PHOBIUS); NON_CYTOPLASMIC_DOMAIN (PHOBIUS); TMhelix (TMHMM)	Yes	No	No	-
1500	Mcal_1500	Contig210.Newo100p95.cap3o60p95	571	No	IV	F:GO:0003743; P:GO:0006413; P:GO:0006184; F:GO:0003924; F:GO:0005525	G3DSA:2.40.30.10 (GENE3D); G3DSA:2.40.30.10 (GENE3D); IPR015256 (PFAM); PTHR23115:SF123 (PANTHER); PTHR23115 (PANTHER); IPR009000 (SUPERFAMILY); IPR009001 (SUPERFAMILY)	Yes	No	Yes	-
1501	Mcal_1501	Contig212.Newo100p95.cap3o60p95	799	No	IV	C:GO:0044424	Coil (COILS); G3DSA:1.20.5.340 (GENE3D)	Yes	No	No	-
1502	Mcal_1502	Contig215.Newo100p95.cap3o60p95	668	No	IV	-	-	Yes	No	No	-
1503	Mcal_1503	Contig217.Newo100p95.cap3o60p95	764	No	IV	F:GO:0003746; P:GO:0006414; P:GO:0006184; F:GO:0003924; F:GO:0005525	IPR005517 (SMART); IPR000640 (SMART); IPR005517 (PFAM); IPR014721 (G3DSA:3.30.230.GENE3D); IPR000640 (G3DSA:3.30.70.GENE3D); IPR000640 (PFAM); PTHR23115:SF103 (PANTHER); PTHR23115 (PANTHER); IPR009022 (SUPERFAMILY); IPR020568 (SUPERFAMILY)	Yes	Yes	Yes	-
1504	Mcal_1504	Contig220.Newo100p95.cap3o60p95	1390	No	IV	F:GO:0005506; F:GO:0016705; P:GO:0055114; F:GO:0020037	IPR001128 (PFAM); IPR001128 (G3DSA:1.10.630.GENE3D); PTHR24300 (PANTHER); PTHR24300:SF130 (PANTHER); TRANSMEMBRANE (PHOBIUS); CYTOPLASMIC_DOMAIN (PHOBIUS); NON_CYTOPLASMIC_DOMAIN (PHOBIUS); IPR001128 (SUPERFAMILY); TMhelix (TMHMM)	Yes	No	No	-
1505	Mcal_1505	Contig221.Newo100p95.cap3o60p95	1366	No	IV	F:GO:0003676; C:GO:0030529; F:GO:0000166	IPR000504 (SMART); IPR000504 (PFAM); IPR012677 (G3DSA:3.30.70.GENE3D); PTHR23003:SF3 (PANTHER); PTHR23003 (PANTHER); IPR000504 (PROSITE_PROFILES); SSF54928 (SUPERFAMILY)	Yes	Yes	No	-
1506	Mcal_1506	Contig226.Newo100p95.cap3o60p95	828	No	IV	C:GO:0005840	IPR011991 (G3DSA:1.10.10.GENE3D); IPR004977 (PFAM); IPR004977 (PANTHER)	Yes	No	No	-
1507	Mcal_1507	Contig228.Newo100p95.cap3o60p95	868	No	IV	F:GO:0031409; C:GO:0005576	IPR000566 (PFAM); IPR012674 (G3DSA:2.40.128.GENE3D); SIGNAL_PEPTIDE_H_REGION (PHOBIUS); SIGNAL_PEPTIDE_N_REGION (PHOBIUS); SIGNAL_PEPTIDE_C_REGION (PHOBIUS); SIGNAL_PEPTIDE (PHOBIUS); NON_CYTOPLASMIC_DOMAIN (PHOBIUS); SignalP-noTM (SIGNALP_GRAM_NEGATIVE); SignalP-TM (SIGNALP_GRAM_POSITIVE); SignalP-noTM (SIGNALP_EUK); IPR011038 (SUPERFAMILY)	Yes	No	No	-
1508	Mcal_1508	Contig229.Newo100p95.cap3o60p95	774	No	IV	-	-	Yes	No	No	-
1509	Mcal_1509	Contig230.Newo100p95.cap3o60p95	636	No	IV	F:GO:0003676; F:GO:0005524	IPR011545 (PFAM); IPR027417 (G3DSA:3.40.50.GENE3D); PTHR24031 (PANTHER); PTHR24031:SF221 (PANTHER); IPR014001 (PROSITE_PROFILES); IPR014014 (PROSITE_PROFILES); IPR027417 (SUPERFAMILY)	Yes	Yes	Yes	-
1510	Mcal_1510	Contig231.Newo100p95.cap3o60p95	969	No	IV	F:GO:0005198	IPR001251 (SMART); IPR001251 (PFAM); IPR001251 (G3DSA:3.40.525.GENE3D); PTHR19993:SF1 (PANTHER); PTHR19993 (PANTHER); IPR001251 (PROSITE_PROFILES); IPR011074 (SUPERFAMILY); IPR001251 (SUPERFAMILY)	Yes	No	No	-
1511	Mcal_1511	Contig232.Newo100p95.cap3o60p95	503	No	IV	F:GO:0005509	-	Yes	No	No	-
1512	Mcal_1512	Contig233.Newo100p95.cap3o60p95	871	No	IV	-	SIGNAL_PEPTIDE_N_REGION (PHOBIUS); NON_CYTOPLASMIC_DOMAIN (PHOBIUS); SIGNAL_PEPTIDE_C_REGION (PHOBIUS); SIGNAL_PEPTIDE (PHOBIUS); SIGNAL_PEPTIDE_H_REGION (PHOBIUS)	Yes	No	No	-
1513	Mcal_1513	Contig234.Newo100p95.cap3o60p95	878	No	IV	-	IPR008922 (G3DSA:1.10.1280.GENE3D); IPR000896 (PFAM); PTHR11511:SF4 (PANTHER); IPR013788 (PANTHER); IPR008922 (SUPERFAMILY)	Yes	Yes	No	-
1514	Mcal_1514	Contig235.Newo100p95.cap3o60p95	598	No	IV	-	-	Yes	No	No	-
1515	Mcal_1515	Contig236.Newo100p95.cap3o60p95	835	No	IV	F:GO:0016301	CYTOPLASMIC_DOMAIN (PHOBIUS); TRANSMEMBRANE (PHOBIUS); NON_CYTOPLASMIC_DOMAIN (PHOBIUS); CYTOPLASMIC_DOMAIN (PHOBIUS); TRANSMEMBRANE (PHOBIUS); TMhelix (TMHMM); TMhelix (TMHMM)	Yes	Yes	Yes	-
1516	Mcal_1516	Contig237.Newo100p95.cap3o60p95	1291	No	IV	-	NON_CYTOPLASMIC_DOMAIN (PHOBIUS); SIGNAL_PEPTIDE_N_REGION (PHOBIUS); SIGNAL_PEPTIDE (PHOBIUS); SIGNAL_PEPTIDE_H_REGION (PHOBIUS); SIGNAL_PEPTIDE_C_REGION (PHOBIUS); TMhelix (TMHMM)	Yes	No	No	-
1517	Mcal_1517	Contig240.Newo100p95.cap3o60p95	622	No	IV	F:GO:0003899; P:GO:0006351; F:GO:0003677; C:GO:0005665	IPR006111 (PIRSF); IPR028363 (PIRSF); IPR006110 (PFAM); IPR012293 (G3DSA:3.90.940.GENE3D); IPR006111 (PANTHER); IPR020708 (PROSITE_PATTERNS); IPR006110 (SUPERFAMILY)	Yes	Yes	Yes	map00230 map00240
1518	Mcal_1518	Contig243.Newo100p95.cap3o60p95	671	No	IV	P:GO:0055114; P:GO:0006979; F:GO:0004601; F:GO:0020037	IPR019791 (PRINTS); IPR002007 (PFAM); IPR002007 (G3DSA:1.10.640.GENE3D); PTHR11475 (PANTHER); IPR002007 (PROSITE_PROFILES); IPR010255 (SUPERFAMILY)	Yes	No	No	map00360 map00940
1519	Mcal_1519	Contig244.Newo100p95.cap3o60p95	797	No	IV	C:GO:0005743; P:GO:0055085; C:GO:0016021; F:GO:0005215	TRANSMEMBRANE (PHOBIUS); TRANSMEMBRANE (PHOBIUS); CYTOPLASMIC_DOMAIN (PHOBIUS); NON_CYTOPLASMIC_DOMAIN (PHOBIUS); NON_CYTOPLASMIC_DOMAIN (PHOBIUS)	Yes	Yes	No	-
1520	Mcal_1520	Contig245.Newo100p95.cap3o60p95	1129	No	IV	-	-	Yes	No	No	-
1521	Mcal_1521	Contig246.Newo100p95.cap3o60p95	622	No	IV	F:GO:0008184; P:GO:0005975; F:GO:0030170	G3DSA:3.40.50.2000 (GENE3D); IPR000811 (PFAM); IPR000811 (PANTHER); SSF53756 (SUPERFAMILY)	Yes	No	No	-
1522	Mcal_1522	Contig248.Newo100p95.cap3o60p95	776	No	IV	C:GO:0070469; F:GO:0008137; C:GO:0031966; P:GO:0022900	IPR000440 (PFAM); IPR000440 (PANTHER); CYTOPLASMIC_DOMAIN (PHOBIUS); NON_CYTOPLASMIC_DOMAIN (PHOBIUS); CYTOPLASMIC_DOMAIN (PHOBIUS); NON_CYTOPLASMIC_DOMAIN (PHOBIUS); TRANSMEMBRANE (PHOBIUS); TRANSMEMBRANE (PHOBIUS); TRANSMEMBRANE (PHOBIUS); TMhelix (TMHMM); TMhelix (TMHMM); TMhelix (TMHMM)	Yes	No	No	map00190
1523	Mcal_1523	Contig252.Newo100p95.cap3o60p95	670	No	IV	F:GO:0016787	-	Yes	Yes	Yes	-
1524	Mcal_1524	Contig253.Newo100p95.cap3o60p95	745	No	IV	F:GO:0003735; P:GO:0006412; C:GO:0015935	IPR001865 (PRINTS); IPR001865 (PFAM); G3DSA:3.40.50.10490 (GENE3D); IPR005706 (PANTHER); IPR023591 (SUPERFAMILY)	Yes	No	No	-
1525	Mcal_1525	Contig255.Newo100p95.cap3o60p95	999	No	IV	-	G3DSA:1.10.287.580 (GENE3D); IPR023796 (PFAM); NON_CYTOPLASMIC_DOMAIN (PHOBIUS); CYTOPLASMIC_DOMAIN (PHOBIUS); TRANSMEMBRANE (PHOBIUS); TRANSMEMBRANE (PHOBIUS); CYTOPLASMIC_DOMAIN (PHOBIUS); IPR023796 (SUPERFAMILY)	Yes	Yes	No	-
1526	Mcal_1526	Contig257.Newo100p95.cap3o60p95	720	No	IV	F:GO:0008137; P:GO:0042773; C:GO:0005739	-	Yes	No	No	map00190
1527	Mcal_1527	Contig258.Newo100p95.cap3o60p95	1296	No	IV	F:GO:0004129	IPR004203 (PFAM); IPR004203 (G3DSA:1.10.442.GENE3D); CYTOPLASMIC_DOMAIN (PHOBIUS); TRANSMEMBRANE (PHOBIUS); NON_CYTOPLASMIC_DOMAIN (PHOBIUS); IPR004203 (SUPERFAMILY); TMhelix (TMHMM)	Yes	Yes	No	map00190
1528	Mcal_1528	Contig260.Newo100p95.cap3o60p95	933	No	IV	-	-	Yes	Yes	No	-
1529	Mcal_1529	Contig263.Newo100p95.cap3o60p95	585	No	IV	P:GO:0006526; P:GO:0000050; F:GO:0005524; F:GO:0004055	-	Yes	No	No	map00330 map00250
1530	Mcal_1530	Contig267.Newo100p95.cap3o60p95	838	No	IV	F:GO:0016740	IPR023352 (G3DSA:1.20.120.GENE3D); IPR001129 (PFAM); PTHR10250 (PANTHER); PTHR10250:SF15 (PANTHER); TRANSMEMBRANE (PHOBIUS); NON_CYTOPLASMIC_DOMAIN (PHOBIUS); CYTOPLASMIC_DOMAIN (PHOBIUS); TRANSMEMBRANE (PHOBIUS); TRANSMEMBRANE (PHOBIUS); CYTOPLASMIC_DOMAIN (PHOBIUS); NON_CYTOPLASMIC_DOMAIN (PHOBIUS); SSF161084 (SUPERFAMILY); TMhelix (TMHMM); TMhelix (TMHMM); TMhelix (TMHMM)	Yes	No	No	-
1531	Mcal_1531	Contig268.Newo100p95.cap3o60p95	612	No	IV	-	-	Yes	No	No	-
1532	Mcal_1532	Contig269.Newo100p95.cap3o60p95	904	No	IV	C:GO:0016021; C:GO:0005739; P:GO:0055114; F:GO:0008137	-	Yes	No	No	map00190
1533	Mcal_1533	Contig272.Newo100p95.cap3o60p95	630	No	IV	-	NON_CYTOPLASMIC_DOMAIN (PHOBIUS); SIGNAL_PEPTIDE_N_REGION (PHOBIUS); SIGNAL_PEPTIDE_C_REGION (PHOBIUS); SIGNAL_PEPTIDE (PHOBIUS); SIGNAL_PEPTIDE_H_REGION (PHOBIUS); SignalP-noTM (SIGNALP_EUK)	No	No	No	-
1534	Mcal_1534	Contig276.Newo100p95.cap3o60p95	661	No	IV	-	-	Yes	Yes	Yes	-
1535	Mcal_1535	Contig277.Newo100p95.cap3o60p95	761	No	IV	P:GO:0006937; C:GO:0005861	CYTOPLASMIC_DOMAIN (PHOBIUS); SIGNAL_PEPTIDE_N_REGION (PHOBIUS); TRANSMEMBRANE (PHOBIUS); NON_CYTOPLASMIC_DOMAIN (PHOBIUS); SIGNAL_PEPTIDE_C_REGION (PHOBIUS); SIGNAL_PEPTIDE (PHOBIUS); SIGNAL_PEPTIDE_H_REGION (PHOBIUS); TMhelix (TMHMM); TMhelix (TMHMM)	Yes	No	No	-
1536	Mcal_1536	Contig283.Newo100p95.cap3o60p95	843	No	IV	C:GO:0030176; C:GO:0005784; P:GO:0006613	IPR009779 (PFAM); PTHR13399:SF2 (PANTHER); IPR009779 (PANTHER); TRANSMEMBRANE (PHOBIUS); NON_CYTOPLASMIC_DOMAIN (PHOBIUS); CYTOPLASMIC_DOMAIN (PHOBIUS); TMhelix (TMHMM)	Yes	Yes	No	-
1537	Mcal_1537	Contig287.Newo100p95.cap3o60p95	373	No	IV	-	-	Yes	No	No	-
1538	Mcal_1538	Contig294.Newo100p95.cap3o60p95	378	No	IV	-	NON_CYTOPLASMIC_DOMAIN (PHOBIUS); CYTOPLASMIC_DOMAIN (PHOBIUS); TRANSMEMBRANE (PHOBIUS); CYTOPLASMIC_DOMAIN (PHOBIUS); TRANSMEMBRANE (PHOBIUS); TMhelix (TMHMM); TMhelix (TMHMM)	Yes	No	No	-
1539	Mcal_1539	Contig296.Newo100p95.cap3o60p95	666	No	IV	-	-	No	No	No	-
1540	Mcal_1540	Contig298.Newo100p95.cap3o60p95	608	No	IV	C:GO:0005840; F:GO:0003735; P:GO:0006412	Coil (COILS); IPR001380 (PFAM); IPR001380 (PANTHER); PTHR11722:SF0 (PANTHER); IPR018256 (PROSITE_PATTERNS)	Yes	No	Yes	-
1541	Mcal_1541	Contig299.Newo100p95.cap3o60p95	1163	No	IV	-	SIGNAL_PEPTIDE_N_REGION (PHOBIUS); SIGNAL_PEPTIDE_H_REGION (PHOBIUS); NON_CYTOPLASMIC_DOMAIN (PHOBIUS); SIGNAL_PEPTIDE_C_REGION (PHOBIUS); SIGNAL_PEPTIDE (PHOBIUS); SignalP-noTM (SIGNALP_EUK)	Yes	No	No	-
1542	Mcal_1542	Contig3.Newo100p95.cap3o60p95	1563	No	IV	C:GO:0005576; F:GO:0008061; P:GO:0006030	IPR002557 (SMART); IPR002557 (G3DSA:2.170.140.GENE3D); IPR002557 (PFAM); PTHR23301 (PANTHER); PTHR23301:SF13 (PANTHER); SIGNAL_PEPTIDE_H_REGION (PHOBIUS); NON_CYTOPLASMIC_DOMAIN (PHOBIUS); SIGNAL_PEPTIDE_N_REGION (PHOBIUS); SIGNAL_PEPTIDE (PHOBIUS); SIGNAL_PEPTIDE_C_REGION (PHOBIUS); IPR002557 (PROSITE_PROFILES); IPR002557 (PROSITE_PROFILES); IPR002557 (PROSITE_PROFILES); SignalP-noTM (SIGNALP_EU…	Yes	No	No	-
1543	Mcal_1543	Contig300.Newo100p95.cap3o60p95	910	No	IV	P:GO:0006937; C:GO:0005861	Coil (COILS); Coil (COILS); G3DSA:1.20.5.350 (GENE3D); IPR001978 (PFAM); IPR027707 (PANTHER); PTHR11521:SF1 (PANTHER); SSF90250 (SUPERFAMILY)	Yes	No	No	-
1544	Mcal_1544	Contig301.Newo100p95.cap3o60p95	354	No	IV	-	-	No	No	No	-
1545	Mcal_1545	Contig302.Newo100p95.cap3o60p95	800	No	IV	-	TRANSMEMBRANE (PHOBIUS); CYTOPLASMIC_DOMAIN (PHOBIUS); NON_CYTOPLASMIC_DOMAIN (PHOBIUS); TMhelix (TMHMM)	Yes	No	No	-
1546	Mcal_1546	Contig307.Newo100p95.cap3o60p95	679	No	IV	P:GO:0006979; F:GO:0051287; F:GO:0004450; P:GO:0006103; P:GO:0006749; F:GO:0000287; P:GO:0006099; F:GO:0005102; C:GO:0005829; P:GO:0006102; C:GO:0005739; F:GO:0042803	IPR024084 (PFAM); IPR024084 (G3DSA:3.40.718.GENE3D); IPR004790 (PANTHER); IPR019818 (PROSITE_PATTERNS); SSF53659 (SUPERFAMILY)	Yes	No	Yes	map00720 map00480 map00020
1547	Mcal_1547	Contig312.Newo100p95.cap3o60p95	481	No	IV	F:GO:0003779; C:GO:0016459; F:GO:0005524; F:GO:0003774; F:GO:0032440; P:GO:0055114	-	Yes	No	No	-
1548	Mcal_1548	Contig314.Newo100p95.cap3o60p95	539	No	IV	-	CYTOPLASMIC_DOMAIN (PHOBIUS); TRANSMEMBRANE (PHOBIUS); NON_CYTOPLASMIC_DOMAIN (PHOBIUS); TMhelix (TMHMM)	No	No	No	-
1549	Mcal_1549	Contig315.Newo100p95.cap3o60p95	478	No	IV	-	SIGNAL_PEPTIDE_C_REGION (PHOBIUS); SIGNAL_PEPTIDE (PHOBIUS); NON_CYTOPLASMIC_DOMAIN (PHOBIUS); SIGNAL_PEPTIDE_H_REGION (PHOBIUS); SIGNAL_PEPTIDE_N_REGION (PHOBIUS)	No	No	No	-
1550	Mcal_1550	Contig316.Newo100p95.cap3o60p95	618	No	IV	F:GO:0004725; F:GO:0008138; P:GO:0035335	-	Yes	No	No	-
1551	Mcal_1551	Contig318.Newo100p95.cap3o60p95	567	No	IV	-	-	Yes	No	No	-
1552	Mcal_1552	Contig32.Newo100p95.cap3o60p95	2201	No	IV	C:GO:0005852; C:GO:0016282; C:GO:0033290; P:GO:0006446; P:GO:0001731; F:GO:0003743; F:GO:0005515	IPR000555 (SMART); IPR000555 (PFAM); PTHR10540 (PANTHER); PTHR10540:SF6 (PANTHER)	Yes	Yes	Yes	-
1553	Mcal_1553	Contig326.Newo100p95.cap3o60p95	461	No	IV	-	-	Yes	Yes	Yes	-
1554	Mcal_1554	Contig329.Newo100p95.cap3o60p95	483	No	IV	-	-	Yes	No	No	-
1555	Mcal_1555	Contig333.Newo100p95.cap3o60p95	577	No	IV	C:GO:0005840; F:GO:0046872; F:GO:0003735; P:GO:0006412; F:GO:0019843	-	Yes	No	Yes	-
1556	Mcal_1556	Contig334.Newo100p95.cap3o60p95	407	No	IV	-	-	Yes	No	No	-
1557	Mcal_1557	Contig335.Newo100p95.cap3o60p95	595	No	IV	-	-	Yes	No	No	-
1558	Mcal_1558	Contig336.Newo100p95.cap3o60p95	488	No	IV	C:GO:0005576; P:GO:0006030; F:GO:0008061	IPR002557 (G3DSA:2.170.140.GENE3D); IPR002557 (PROSITE_PROFILES); IPR002557 (SUPERFAMILY)	Yes	No	No	-
1559	Mcal_1559	Contig346.Newo100p95.cap3o60p95	235	No	IV	-	-	Yes	No	No	-
1560	Mcal_1560	Contig349.Newo100p95.cap3o60p95	414	No	IV	-	-	Yes	No	No	-
1561	Mcal_1561	Contig35.Newo100p95.cap3o60p95	1526	No	IV	-	NON_CYTOPLASMIC_DOMAIN (PHOBIUS); CYTOPLASMIC_DOMAIN (PHOBIUS); TRANSMEMBRANE (PHOBIUS); CYTOPLASMIC_DOMAIN (PHOBIUS); NON_CYTOPLASMIC_DOMAIN (PHOBIUS); TRANSMEMBRANE (PHOBIUS); TRANSMEMBRANE (PHOBIUS); TMhelix (TMHMM)	Yes	No	No	-
1562	Mcal_1562	Contig350.Newo100p95.cap3o60p95	834	No	IV	F:GO:0005507; C:GO:0005615; F:GO:0031404; F:GO:0005344; F:GO:0016491; P:GO:0015671; P:GO:0055114	SIGNAL_PEPTIDE_C_REGION (PHOBIUS); NON_CYTOPLASMIC_DOMAIN (PHOBIUS); SIGNAL_PEPTIDE_N_REGION (PHOBIUS); SIGNAL_PEPTIDE (PHOBIUS); SIGNAL_PEPTIDE_H_REGION (PHOBIUS); TMhelix (TMHMM)	Yes	No	No	-
1563	Mcal_1563	Contig352.Newo100p95.cap3o60p95	1059	No	IV	F:GO:0005509	-	Yes	No	No	-
1564	Mcal_1564	Contig357.Newo100p95.cap3o60p95	205	No	IV	-	-	No	No	No	-
1565	Mcal_1565	Contig362.Newo100p95.cap3o60p95	848	No	IV	P:GO:0071353; P:GO:0051297; F:GO:0005525; P:GO:0006184; C:GO:0005881; P:GO:0051258; C:GO:0000242; F:GO:0003924; F:GO:0005200	IPR002452 (PRINTS); IPR000217 (PRINTS); IPR003008 (SMART); IPR018316 (PFAM); IPR018316 (G3DSA:3.30.1330.GENE3D); IPR003008 (PFAM); IPR003008 (G3DSA:3.40.50.GENE3D); IPR000217 (PANTHER); PTHR11588:SF65 (PANTHER); SIGNAL_PEPTIDE_N_REGION (PHOBIUS); NON_CYTOPLASMIC_DOMAIN (PHOBIUS); SIGNAL_PEPTIDE_C_REGION (PHOBIUS); SIGNAL_PEPTIDE (PHOBIUS); SIGNAL_PEPTIDE_H_REGION (PHOBIUS); IPR003008 (SUPERFAMILY…	Yes	Yes	Yes	-
1566	Mcal_1566	Contig365.Newo100p95.cap3o60p95	369	No	IV	-	SIGNAL_PEPTIDE_N_REGION (PHOBIUS); SIGNAL_PEPTIDE_C_REGION (PHOBIUS); NON_CYTOPLASMIC_DOMAIN (PHOBIUS); SIGNAL_PEPTIDE_H_REGION (PHOBIUS); SIGNAL_PEPTIDE (PHOBIUS)	Yes	No	No	-
1567	Mcal_1567	Contig369.Newo100p95.cap3o60p95	542	No	IV	-	-	Yes	No	No	-
1568	Mcal_1568	Contig370.Newo100p95.cap3o60p95	482	No	IV	-	CYTOPLASMIC_DOMAIN (PHOBIUS); TRANSMEMBRANE (PHOBIUS); NON_CYTOPLASMIC_DOMAIN (PHOBIUS); TMhelix (TMHMM)	No	No	No	-
1569	Mcal_1569	Contig371.Newo100p95.cap3o60p95	823	No	IV	F:GO:0003824	G3DSA:2.40.10.10 (GENE3D); IPR009003 (SUPERFAMILY)	Yes	No	No	-
1570	Mcal_1570	Contig373.Newo100p95.cap3o60p95	706	No	IV	C:GO:0005840; F:GO:0003735; P:GO:0006412	IPR029004 (PFAM); PTHR10544:SF0 (PANTHER); IPR002672 (PANTHER)	Yes	No	No	-
1571	Mcal_1571	Contig374.Newo100p95.cap3o60p95	1595	No	IV	P:GO:0055114; F:GO:0005506; F:GO:0016705; F:GO:0020037	IPR002401 (PRINTS); IPR001128 (G3DSA:1.10.630.GENE3D); IPR001128 (PFAM); PTHR24300:SF116 (PANTHER); PTHR24300 (PANTHER); IPR017972 (PROSITE_PATTERNS); CYTOPLASMIC_DOMAIN (PHOBIUS); NON_CYTOPLASMIC_DOMAIN (PHOBIUS); TRANSMEMBRANE (PHOBIUS); IPR001128 (SUPERFAMILY); TMhelix (TMHMM)	Yes	No	No	-
1572	Mcal_1572	Contig378.Newo100p95.cap3o60p95	1975	No	IV	C:GO:0005840; F:GO:0003735; P:GO:0006412	IPR002132 (PIRSF); IPR022803 (G3DSA:3.30.1440.GENE3D); IPR002132 (PFAM); IPR002132 (PFAM); IPR002132 (PANTHER); PTHR11994:SF8 (PANTHER); IPR020929 (PROSITE_PATTERNS); IPR022803 (SUPERFAMILY)	Yes	Yes	Yes	-
1573	Mcal_1573	Contig379.Newo100p95.cap3o60p95	825	No	IV	-	-	Yes	No	No	-
1574	Mcal_1574	Contig384.Newo100p95.cap3o60p95	660	No	IV	F:GO:0004672	-	Yes	No	No	-
1575	Mcal_1575	Contig386.Newo100p95.cap3o60p95	311	No	IV	-	-	No	No	No	-
1576	Mcal_1576	Contig387.Newo100p95.cap3o60p95	412	No	IV	F:GO:0003824; P:GO:0008152	IPR002591 (PFAM); IPR017849 (G3DSA:3.40.720.GENE3D); IPR024873 (PANTHER); IPR017850 (SUPERFAMILY)	Yes	No	No	-
1577	Mcal_1577	Contig390.Newo100p95.cap3o60p95	1067	No	IV	-	NON_CYTOPLASMIC_DOMAIN (PHOBIUS); TRANSMEMBRANE (PHOBIUS); CYTOPLASMIC_DOMAIN (PHOBIUS); TMhelix (TMHMM)	Yes	No	No	-
1578	Mcal_1578	Contig391.Newo100p95.cap3o60p95	664	No	IV	-	TRANSMEMBRANE (PHOBIUS); CYTOPLASMIC_DOMAIN (PHOBIUS); NON_CYTOPLASMIC_DOMAIN (PHOBIUS); TMhelix (TMHMM)	No	No	No	-
1579	Mcal_1579	Contig394.Newo100p95.cap3o60p95	368	No	IV	F:GO:0003779; P:GO:0031032	IPR001715 (G3DSA:1.10.418.GENE3D); PTHR18959 (PANTHER); IPR001715 (SUPERFAMILY)	Yes	No	No	-
1580	Mcal_1580	Contig397.Newo100p95.cap3o60p95	756	No	IV	F:GO:0031013; P:GO:0000003; P:GO:0040007; F:GO:0005509; P:GO:0002119	-	Yes	No	No	-
1581	Mcal_1581	Contig398.Newo100p95.cap3o60p95	758	No	IV	F:GO:0004563; P:GO:0005975	IPR025705 (PRINTS); IPR013781 (G3DSA:3.20.20.GENE3D); IPR029019 (PFAM); IPR029018 (G3DSA:3.30.379.GENE3D); PTHR22600:SF5 (PANTHER); PTHR22600 (PANTHER); SIGNAL_PEPTIDE_H_REGION (PHOBIUS); CYTOPLASMIC_DOMAIN (PHOBIUS); SIGNAL_PEPTIDE_C_REGION (PHOBIUS); SIGNAL_PEPTIDE (PHOBIUS); TRANSMEMBRANE (PHOBIUS); SIGNAL_PEPTIDE_N_REGION (PHOBIUS); NON_CYTOPLASMIC_DOMAIN (PHOBIUS); IPR029018 (SUPERFAMILY); T…	Yes	No	No	map00520 map00513 map00511 map00604 map00603 map00531
1582	Mcal_1582	Contig4.Newo100p95.cap3o60p95	2135	No	IV	F:GO:0004004; F:GO:0003676; C:GO:0005730; F:GO:0005524; F:GO:0005515; P:GO:0000354; C:GO:0005682; C:GO:0071013; C:GO:0005654; F:GO:0008565; P:GO:0031204	IPR004179 (SMART); IPR004179 (SMART); IPR004179 (PFAM); G3DSA:1.10.3380.10 (GENE3D); G3DSA:1.10.150.20 (GENE3D); IPR000008 (G3DSA:2.60.40.GENE3D); IPR027137 (PANTHER); IPR014756 (SUPERFAMILY); SSF158702 (SUPERFAMILY)	Yes	Yes	Yes	-
1583	Mcal_1583	Contig400.Newo100p95.cap3o60p95	984	No	IV	-	-	No	No	No	-
1584	Mcal_1584	Contig401.Newo100p95.cap3o60p95	111	No	IV	-	TRANSMEMBRANE (PHOBIUS); CYTOPLASMIC_DOMAIN (PHOBIUS); NON_CYTOPLASMIC_DOMAIN (PHOBIUS); TMhelix (TMHMM)	No	No	No	-
1585	Mcal_1585	Contig402.Newo100p95.cap3o60p95	561	No	IV	-	NON_CYTOPLASMIC_DOMAIN (PHOBIUS); SIGNAL_PEPTIDE_N_REGION (PHOBIUS); SIGNAL_PEPTIDE_H_REGION (PHOBIUS); SIGNAL_PEPTIDE (PHOBIUS); SIGNAL_PEPTIDE_C_REGION (PHOBIUS); SignalP-noTM (SIGNALP_EUK)	Yes	No	No	-
1586	Mcal_1586	Contig406.Newo100p95.cap3o60p95	983	No	IV	F:GO:0003746; P:GO:0006414; P:GO:0006184; F:GO:0003924; C:GO:0005737; F:GO:0005525	IPR000994 (G3DSA:3.90.230.GENE3D); IPR000994 (SUPERFAMILY)	Yes	Yes	Yes	-
1587	Mcal_1587	Contig408.Newo100p95.cap3o60p95	973	No	IV	F:GO:0005524; P:GO:0016310; F:GO:0047323	-	Yes	No	Yes	-
1588	Mcal_1588	Contig409.Newo100p95.cap3o60p95	1345	No	IV	C:GO:0005576	IPR001283 (SMART); IPR014044 (G3DSA:3.40.33.GENE3D); IPR014044 (PFAM); IPR001283 (PANTHER); PTHR10334:SF189 (PANTHER); IPR014044 (SUPERFAMILY)	Yes	No	No	-
1589	Mcal_1589	Contig410.Newo100p95.cap3o60p95	305	No	IV	-	-	Yes	No	No	-
1590	Mcal_1590	Contig411.Newo100p95.cap3o60p95	251	No	IV	-	-	No	No	No	-
1591	Mcal_1591	Contig413.Newo100p95.cap3o60p95	2334	No	IV	F:GO:0008061; P:GO:0006030; C:GO:0005576	IPR002557 (SMART); IPR002557 (G3DSA:2.170.140.GENE3D); IPR002557 (PFAM); PTHR22933 (PANTHER); SIGNAL_PEPTIDE_C_REGION (PHOBIUS); SIGNAL_PEPTIDE_N_REGION (PHOBIUS); SIGNAL_PEPTIDE_H_REGION (PHOBIUS); SIGNAL_PEPTIDE (PHOBIUS); NON_CYTOPLASMIC_DOMAIN (PHOBIUS); IPR002557 (PROSITE_PROFILES); SignalP-noTM (SIGNALP_EUK); IPR002557 (SUPERFAMILY)	Yes	No	No	-
1592	Mcal_1592	Contig415.Newo100p95.cap3o60p95	2905	No	IV	C:GO:0032982; C:GO:0030016; F:GO:0003774; F:GO:0032440; P:GO:0055114	-	Yes	No	No	-
1593	Mcal_1593	Contig416.Newo100p95.cap3o60p95	534	No	IV	P:GO:0016310; F:GO:0000166; F:GO:0004054	IPR014746 (G3DSA:3.30.590.GENE3D); IPR022414 (PFAM); PTHR11547 (PANTHER); PTHR11547:SF20 (PANTHER); IPR022414 (PROSITE_PROFILES); SSF55931 (SUPERFAMILY)	Yes	No	No	map00330
1594	Mcal_1594	Contig421.Newo100p95.cap3o60p95	560	No	IV	F:GO:0003735; C:GO:0022627; P:GO:0006412	-	Yes	No	Yes	-
1595	Mcal_1595	Contig426.Newo100p95.cap3o60p95	689	No	IV	C:GO:0005856; C:GO:0005737; F:GO:0005524	IPR004000 (PRINTS); G3DSA:3.30.420.40 (GENE3D); IPR004000 (PFAM); IPR004000 (PANTHER); PTHR11937:SF162 (PANTHER); IPR020902 (PROSITE_PATTERNS); SSF53067 (SUPERFAMILY)	Yes	Yes	Yes	-
1596	Mcal_1596	Contig431.Newo100p95.cap3o60p95	661	No	IV	-	-	No	No	No	-
1597	Mcal_1597	Contig432.Newo100p95.cap3o60p95	534	No	IV	F:GO:0003779; P:GO:0030036	IPR005455 (SMART); IPR005455 (PFAM); G3DSA:3.30.450.30 (GENE3D); IPR005455 (PANTHER); PTHR11604:SF0 (PANTHER); IPR005455 (SUPERFAMILY)	Yes	No	Yes	-
1598	Mcal_1598	Contig434.Newo100p95.cap3o60p95	867	No	IV	F:GO:0046872; P:GO:0006801; F:GO:0004784; P:GO:0055114	IPR001424 (PRINTS); IPR001424 (PFAM); IPR001424 (G3DSA:2.60.40.GENE3D); PTHR10003 (PANTHER); IPR018152 (PROSITE_PATTERNS); IPR018152 (PROSITE_PATTERNS); SIGNAL_PEPTIDE_H_REGION (PHOBIUS); SIGNAL_PEPTIDE_N_REGION (PHOBIUS); SIGNAL_PEPTIDE_C_REGION (PHOBIUS); SIGNAL_PEPTIDE (PHOBIUS); NON_CYTOPLASMIC_DOMAIN (PHOBIUS); SignalP-TM (SIGNALP_GRAM_POSITIVE); IPR001424 (SUPERFAMILY)	Yes	Yes	Yes	-
1599	Mcal_1599	Contig436.Newo100p95.cap3o60p95	360	No	IV	C:GO:0005743; P:GO:0055085; C:GO:0016021; F:GO:0005215	-	Yes	Yes	Yes	-
1600	Mcal_1600	Contig437.Newo100p95.cap3o60p95	427	No	IV	P:GO:0005975; C:GO:0005576; F:GO:0008061; F:GO:0016810; P:GO:0006030	PTHR11177 (PANTHER); PTHR11177:SF136 (PANTHER)	Yes	No	No	-
1601	Mcal_1601	Contig439.Newo100p95.cap3o60p95	987	No	IV	C:GO:0005861; P:GO:0006937	Coil (COILS); Coil (COILS); IPR027707 (PANTHER); PTHR11521:SF1 (PANTHER)	Yes	No	No	-
1602	Mcal_1602	Contig442.Newo100p95.cap3o60p95	256	No	IV	-	CYTOPLASMIC_DOMAIN (PHOBIUS); NON_CYTOPLASMIC_DOMAIN (PHOBIUS); TRANSMEMBRANE (PHOBIUS); TMhelix (TMHMM)	No	No	No	-
1603	Mcal_1603	Contig443.Newo100p95.cap3o60p95	367	No	IV	-	-	No	No	No	-
1604	Mcal_1604	Contig444.Newo100p95.cap3o60p95	363	No	IV	-	-	Yes	No	No	-
1605	Mcal_1605	Contig445.Newo100p95.cap3o60p95	391	No	IV	-	G3DSA:3.90.25.10 (GENE3D)	Yes	No	No	-
1606	Mcal_1606	Contig446.Newo100p95.cap3o60p95	562	No	IV	-	-	No	No	No	-
1607	Mcal_1607	Contig448.Newo100p95.cap3o60p95	633	No	IV	C:GO:0005856; C:GO:0005737; F:GO:0005524	-	Yes	Yes	Yes	-
1608	Mcal_1608	Contig449.Newo100p95.cap3o60p95	812	No	IV	F:GO:0005507; C:GO:0005615; F:GO:0031404; F:GO:0005344; F:GO:0016491; P:GO:0015671; P:GO:0055114	SIGNAL_PEPTIDE_C_REGION (PHOBIUS); SIGNAL_PEPTIDE (PHOBIUS); SIGNAL_PEPTIDE_N_REGION (PHOBIUS); TRANSMEMBRANE (PHOBIUS); SIGNAL_PEPTIDE_H_REGION (PHOBIUS); CYTOPLASMIC_DOMAIN (PHOBIUS); NON_CYTOPLASMIC_DOMAIN (PHOBIUS); PS51257 (PROSITE_PROFILES); TMhelix (TMHMM); TMhelix (TMHMM)	Yes	No	No	-
1609	Mcal_1609	Contig450.Newo100p95.cap3o60p95	843	No	IV	F:GO:0031404; C:GO:0005615; P:GO:0015671; F:GO:0016491; F:GO:0005507; F:GO:0005344; P:GO:0051259; P:GO:0055114	-	Yes	No	No	-
1610	Mcal_1610	Contig452.Newo100p95.cap3o60p95	729	No	IV	C:GO:0005615	G3DSA:3.30.497.10 (GENE3D); IPR023796 (PFAM); IPR000215 (PANTHER); IPR023796 (SUPERFAMILY)	Yes	No	No	-
1611	Mcal_1611	Contig453.Newo100p95.cap3o60p95	869	No	IV	-	-	No	No	No	-
1612	Mcal_1612	Contig454.Newo100p95.cap3o60p95	1264	No	IV	F:GO:0008061; P:GO:0006030; C:GO:0005576	IPR002557 (SMART); IPR002557 (PFAM); IPR002557 (G3DSA:2.170.140.GENE3D); PTHR22933 (PANTHER); SIGNAL_PEPTIDE_N_REGION (PHOBIUS); CYTOPLASMIC_DOMAIN (PHOBIUS); SIGNAL_PEPTIDE_H_REGION (PHOBIUS); TRANSMEMBRANE (PHOBIUS); SIGNAL_PEPTIDE_C_REGION (PHOBIUS); NON_CYTOPLASMIC_DOMAIN (PHOBIUS); SIGNAL_PEPTIDE (PHOBIUS); IPR002557 (PROSITE_PROFILES); SignalP-noTM (SIGNALP_EUK); IPR002557 (SUPERFAMILY); TM…	Yes	No	No	-
1613	Mcal_1613	Contig459.Newo100p95.cap3o60p95	579	No	IV	C:GO:0005615	G3DSA:2.30.39.10 (GENE3D); G3DSA:3.30.497.10 (GENE3D); IPR023796 (PFAM); IPR000215 (PANTHER); IPR023796 (SUPERFAMILY)	Yes	No	No	-
1614	Mcal_1614	Contig460.Newo100p95.cap3o60p95	486	No	IV	-	CYTOPLASMIC_DOMAIN (PHOBIUS); TRANSMEMBRANE (PHOBIUS); CYTOPLASMIC_DOMAIN (PHOBIUS); NON_CYTOPLASMIC_DOMAIN (PHOBIUS); TRANSMEMBRANE (PHOBIUS)	Yes	No	No	-
1615	Mcal_1615	Contig462.Newo100p95.cap3o60p95	551	No	IV	P:GO:0046034; P:GO:0015992	IPR004100 (PFAM); G3DSA:2.40.10.170 (GENE3D); PTHR15184 (PANTHER); PTHR15184:SF32 (PANTHER); IPR004100 (SUPERFAMILY)	Yes	Yes	Yes	-
1616	Mcal_1616	Contig463.Newo100p95.cap3o60p95	647	No	IV	-	-	Yes	No	No	-
1617	Mcal_1617	Contig464.Newo100p95.cap3o60p95	589	No	IV	-	TMhelix (TMHMM)	No	No	No	-
1618	Mcal_1618	Contig467.Newo100p95.cap3o60p95	813	No	IV	F:GO:0016491; P:GO:0055114	-	Yes	No	No	-
1619	Mcal_1619	Contig469.Newo100p95.cap3o60p95	619	No	IV	C:GO:0005737; P:GO:0016310; F:GO:0005524; F:GO:0004054	-	Yes	No	No	map00330
1620	Mcal_1620	Contig470.Newo100p95.cap3o60p95	433	No	IV	F:GO:0005509	-	Yes	Yes	No	-
1621	Mcal_1621	Contig474.Newo100p95.cap3o60p95	733	No	IV	F:GO:0005507; C:GO:0005615; F:GO:0031404; F:GO:0005344; F:GO:0016491; P:GO:0015671; P:GO:0055114	-	Yes	No	No	-
1622	Mcal_1622	Contig476.Newo100p95.cap3o60p95	398	No	IV	-	-	Yes	No	No	-
1623	Mcal_1623	Contig478.Newo100p95.cap3o60p95	441	No	IV	P:GO:0006937; C:GO:0005861	-	Yes	No	No	-
1624	Mcal_1624	Contig480.Newo100p95.cap3o60p95	1037	No	IV	F:GO:0003779; C:GO:0016459; F:GO:0005524; F:GO:0003774; F:GO:0032440; P:GO:0055114	SIGNAL_PEPTIDE_N_REGION (PHOBIUS); SIGNAL_PEPTIDE (PHOBIUS); SIGNAL_PEPTIDE_H_REGION (PHOBIUS); NON_CYTOPLASMIC_DOMAIN (PHOBIUS); SIGNAL_PEPTIDE_C_REGION (PHOBIUS); SignalP-TM (SIGNALP_GRAM_POSITIVE); SignalP-noTM (SIGNALP_GRAM_NEGATIVE)	Yes	No	No	-
1625	Mcal_1625	Contig483.Newo100p95.cap3o60p95	113	No	IV	-	-	No	No	No	-
1626	Mcal_1626	Contig485.Newo100p95.cap3o60p95	637	No	IV	-	SIGNAL_PEPTIDE_N_REGION (PHOBIUS); SIGNAL_PEPTIDE_C_REGION (PHOBIUS); SIGNAL_PEPTIDE (PHOBIUS); NON_CYTOPLASMIC_DOMAIN (PHOBIUS); SIGNAL_PEPTIDE_H_REGION (PHOBIUS); SignalP-noTM (SIGNALP_GRAM_NEGATIVE)	No	No	No	-
1627	Mcal_1627	Contig487.Newo100p95.cap3o60p95	426	No	IV	-	-	Yes	No	No	-
1628	Mcal_1628	Contig489.Newo100p95.cap3o60p95	321	No	IV	-	NON_CYTOPLASMIC_DOMAIN (PHOBIUS); CYTOPLASMIC_DOMAIN (PHOBIUS); TRANSMEMBRANE (PHOBIUS); TMhelix (TMHMM)	Yes	No	Yes	-
1629	Mcal_1629	Contig490.Newo100p95.cap3o60p95	583	No	IV	C:GO:0005840; F:GO:0003735; P:GO:0006412	-	Yes	No	Yes	-
1630	Mcal_1630	Contig491.Newo100p95.cap3o60p95	383	No	IV	-	-	No	No	No	-
1631	Mcal_1631	Contig494.Newo100p95.cap3o60p95	588	No	IV	-	-	No	No	No	-
1632	Mcal_1632	Contig497.Newo100p95.cap3o60p95	455	No	IV	-	-	Yes	No	No	-
1633	Mcal_1633	Contig498.Newo100p95.cap3o60p95	564	No	IV	P:GO:0031047; P:GO:0006413; F:GO:0008022; F:GO:0000166; P:GO:1900153; F:GO:0008143; P:GO:0045727; C:GO:0005829; C:GO:0071013; C:GO:0010494; P:GO:0048255; P:GO:2000623; P:GO:0060213; F:GO:0008494; P:GO:0000398; P:GO:0006378	IPR002004 (SMART); IPR002004 (PFAM); IPR002004 (G3DSA:1.10.1900.GENE3D); PTHR24011:SF239 (PANTHER); PTHR24011 (PANTHER); IPR002004 (PROSITE_PROFILES); IPR002004 (SUPERFAMILY)	Yes	No	No	-
1634	Mcal_1634	Contig5.Newo100p95.cap3o60p95	1308	No	IV	F:GO:0005509	IPR002048 (SMART); IPR011992 (G3DSA:1.10.238.GENE3D); IPR011992 (PFAM); PTHR10891 (PANTHER); PTHR10891:SF539 (PANTHER); IPR018247 (PROSITE_PATTERNS); IPR002048 (PROSITE_PROFILES); IPR002048 (PROSITE_PROFILES); SSF47473 (SUPERFAMILY)	Yes	Yes	No	-
1635	Mcal_1635	Contig500.Newo100p95.cap3o60p95	327	No	IV	-	TMhelix (TMHMM)	Yes	No	No	-
1636	Mcal_1636	Contig501.Newo100p95.cap3o60p95	1104	No	IV	C:GO:0005874; P:GO:0051258; P:GO:0006184; P:GO:0007017; F:GO:0003924; F:GO:0005200; F:GO:0005525	-	Yes	Yes	Yes	-
1637	Mcal_1637	Contig503.Newo100p95.cap3o60p95	287	No	IV	-	SIGNAL_PEPTIDE_N_REGION (PHOBIUS); SIGNAL_PEPTIDE (PHOBIUS); NON_CYTOPLASMIC_DOMAIN (PHOBIUS); SIGNAL_PEPTIDE_C_REGION (PHOBIUS); SIGNAL_PEPTIDE_H_REGION (PHOBIUS); SignalP-TM (SIGNALP_GRAM_POSITIVE); SignalP-noTM (SIGNALP_EUK)	Yes	No	No	-
1638	Mcal_1638	Contig506.Newo100p95.cap3o60p95	669	No	IV	C:GO:0005856; C:GO:0005737; F:GO:0005524	IPR029058 (G3DSA:3.40.50.GENE3D); IPR002018 (PFAM); PTHR11559 (PANTHER); PTHR11559:SF154 (PANTHER); IPR029058 (SUPERFAMILY)	Yes	Yes	Yes	-
1639	Mcal_1639	Contig507.Newo100p95.cap3o60p95	843	No	IV	F:GO:0046872; P:GO:0006801; F:GO:0004784; P:GO:0055114	IPR001424 (PRINTS); IPR001424 (PFAM); IPR001424 (G3DSA:2.60.40.GENE3D); PTHR10003 (PANTHER); SIGNAL_PEPTIDE_N_REGION (PHOBIUS); SIGNAL_PEPTIDE_C_REGION (PHOBIUS); NON_CYTOPLASMIC_DOMAIN (PHOBIUS); SIGNAL_PEPTIDE (PHOBIUS); SIGNAL_PEPTIDE_H_REGION (PHOBIUS); SignalP-noTM (SIGNALP_EUK); SignalP-noTM (SIGNALP_GRAM_NEGATIVE); IPR001424 (SUPERFAMILY)	Yes	Yes	Yes	-
1640	Mcal_1640	Contig510.Newo100p95.cap3o60p95	822	No	IV	F:GO:0005507; C:GO:0005615; F:GO:0031404; F:GO:0005344; F:GO:0016491; P:GO:0015671; P:GO:0055114	IPR008922 (G3DSA:1.10.1280.GENE3D); IPR005203 (G3DSA:2.60.40.GENE3D); PTHR11511:SF24 (PANTHER); IPR013788 (PANTHER); IPR002227 (PROSITE_PATTERNS); IPR008922 (SUPERFAMILY)	Yes	No	No	-
1641	Mcal_1641	Contig511.Newo100p95.cap3o60p95	693	No	IV	F:GO:0003796	-	Yes	No	No	-
1642	Mcal_1642	Contig513.Newo100p95.cap3o60p95	429	No	IV	-	-	No	No	No	-
1643	Mcal_1643	Contig514.Newo100p95.cap3o60p95	925	No	IV	C:GO:0005840; F:GO:0003735; P:GO:0006414	TMhelix (TMHMM)	Yes	No	Yes	-
1644	Mcal_1644	Contig516.Newo100p95.cap3o60p95	477	No	IV	-	-	No	No	No	-
1645	Mcal_1645	Contig517.Newo100p95.cap3o60p95	1048	No	IV	F:GO:0005515	IPR020472 (PRINTS); IPR001680 (SMART); IPR001680 (PFAM); IPR015943 (G3DSA:2.130.10.GENE3D); PTHR19868 (PANTHER); PTHR19868:SF0 (PANTHER); IPR019775 (PROSITE_PATTERNS); IPR019775 (PROSITE_PATTERNS); IPR001680 (PROSITE_PROFILES); IPR017986 (PROSITE_PROFILES); IPR001680 (PROSITE_PROFILES); IPR001680 (PROSITE_PROFILES); IPR017986 (SUPERFAMILY)	Yes	Yes	Yes	-
1646	Mcal_1646	Contig519.Newo100p95.cap3o60p95	424	No	IV	-	-	Yes	No	No	-
1647	Mcal_1647	Contig521.Newo100p95.cap3o60p95	623	No	IV	-	Coil (COILS); SignalP-noTM (SIGNALP_EUK)	No	No	No	-
1648	Mcal_1648	Contig522.Newo100p95.cap3o60p95	973	No	IV	-	-	Yes	Yes	No	-
1649	Mcal_1649	Contig523.Newo100p95.cap3o60p95	484	No	IV	-	CYTOPLASMIC_DOMAIN (PHOBIUS); TRANSMEMBRANE (PHOBIUS); NON_CYTOPLASMIC_DOMAIN (PHOBIUS); TMhelix (TMHMM); TMhelix (TMHMM)	Yes	No	No	-
1650	Mcal_1650	Contig524.Newo100p95.cap3o60p95	848	No	IV	-	TRANSMEMBRANE (PHOBIUS); NON_CYTOPLASMIC_DOMAIN (PHOBIUS); CYTOPLASMIC_DOMAIN (PHOBIUS); TMhelix (TMHMM)	Yes	No	No	-
1651	Mcal_1651	Contig525.Newo100p95.cap3o60p95	374	No	IV	-	-	No	No	No	-
1652	Mcal_1652	Contig527.Newo100p95.cap3o60p95	701	No	IV	-	-	No	No	No	-
1653	Mcal_1653	Contig528.Newo100p95.cap3o60p95	692	No	IV	-	-	Yes	No	No	-
1654	Mcal_1654	Contig53.Newo100p95.cap3o60p95	1852	No	IV	-	NON_CYTOPLASMIC_DOMAIN (PHOBIUS); TRANSMEMBRANE (PHOBIUS); CYTOPLASMIC_DOMAIN (PHOBIUS); TRANSMEMBRANE (PHOBIUS); NON_CYTOPLASMIC_DOMAIN (PHOBIUS); PS51257 (PROSITE_PROFILES); TMhelix (TMHMM); TMhelix (TMHMM)	No	No	No	-
1655	Mcal_1655	Contig531.Newo100p95.cap3o60p95	935	No	IV	F:GO:0032440; P:GO:0055114; F:GO:0005509	-	Yes	Yes	No	-
1656	Mcal_1656	Contig532.Newo100p95.cap3o60p95	2268	No	IV	C:GO:0043231; C:GO:0016020; P:GO:0055114; F:GO:0004499; F:GO:0050661; F:GO:0050660	IPR002257 (PRINTS); IPR000960 (PRINTS); IPR012143 (PIRSF); G3DSA:3.50.50.60 (GENE3D); IPR020946 (PFAM); PTHR23023 (PANTHER); SIGNAL_PEPTIDE_H_REGION (PHOBIUS); CYTOPLASMIC_DOMAIN (PHOBIUS); SIGNAL_PEPTIDE_N_REGION (PHOBIUS); NON_CYTOPLASMIC_DOMAIN (PHOBIUS); SIGNAL_PEPTIDE (PHOBIUS); SIGNAL_PEPTIDE_C_REGION (PHOBIUS); TRANSMEMBRANE (PHOBIUS); PS51257 (PROSITE_PROFILES); SSF51905 (SUPERFAMILY); SS…	Yes	No	No	map00982
1657	Mcal_1657	Contig533.Newo100p95.cap3o60p95	429	No	IV	-	-	No	No	No	-
1658	Mcal_1658	Contig534.Newo100p95.cap3o60p95	681	No	IV	C:GO:0005743; P:GO:0055085; C:GO:0016021; F:GO:0005215	-	Yes	Yes	Yes	-
1659	Mcal_1659	Contig535.Newo100p95.cap3o60p95	621	No	IV	-	-	Yes	No	No	-
1660	Mcal_1660	Contig537.Newo100p95.cap3o60p95	780	No	IV	F:GO:0003735; P:GO:0006412; C:GO:0030529; C:GO:0005840; C:GO:0005622	CYTOPLASMIC_DOMAIN (PHOBIUS); SIGNAL_PEPTIDE_N_REGION (PHOBIUS); TRANSMEMBRANE (PHOBIUS); SIGNAL_PEPTIDE_C_REGION (PHOBIUS); SIGNAL_PEPTIDE_H_REGION (PHOBIUS); NON_CYTOPLASMIC_DOMAIN (PHOBIUS); SIGNAL_PEPTIDE (PHOBIUS); SignalP-TM (SIGNALP_EUK); TMhelix (TMHMM); TMhelix (TMHMM); TMhelix (TMHMM)	Yes	No	No	-
1661	Mcal_1661	Contig538.Newo100p95.cap3o60p95	2239	No	IV	F:GO:0005509	G3DSA:3.30.420.40 (GENE3D); IPR004000 (PFAM); PTHR11937:SF165 (PANTHER); IPR004000 (PANTHER); CYTOPLASMIC_DOMAIN (PHOBIUS); SIGNAL_PEPTIDE_N_REGION (PHOBIUS); SIGNAL_PEPTIDE_H_REGION (PHOBIUS); SIGNAL_PEPTIDE_C_REGION (PHOBIUS); SIGNAL_PEPTIDE (PHOBIUS); TRANSMEMBRANE (PHOBIUS); NON_CYTOPLASMIC_DOMAIN (PHOBIUS); SignalP-TM (SIGNALP_EUK); SSF53067 (SUPERFAMILY); TMhelix (TMHMM)	Yes	Yes	Yes	-
1662	Mcal_1662	Contig541.Newo100p95.cap3o60p95	968	No	IV	C:GO:0005856; C:GO:0005737; F:GO:0005524	SIGNAL_PEPTIDE_H_REGION (PHOBIUS); SIGNAL_PEPTIDE_N_REGION (PHOBIUS); SIGNAL_PEPTIDE_C_REGION (PHOBIUS); NON_CYTOPLASMIC_DOMAIN (PHOBIUS); SIGNAL_PEPTIDE (PHOBIUS); SignalP-noTM (SIGNALP_EUK); SignalP-TM (SIGNALP_GRAM_POSITIVE); SignalP-noTM (SIGNALP_GRAM_NEGATIVE)	Yes	Yes	Yes	-
1663	Mcal_1663	Contig545.Newo100p95.cap3o60p95	638	No	IV	F:GO:0003735; F:GO:0003723; C:GO:0015935; P:GO:0006412	-	Yes	No	No	-
1664	Mcal_1664	Contig547.Newo100p95.cap3o60p95	1184	No	IV	F:GO:0042302	IPR000618 (PRINTS); IPR000618 (PFAM); PTHR10380 (PANTHER); PTHR10380:SF120 (PANTHER); IPR000618 (PROSITE_PATTERNS); CYTOPLASMIC_DOMAIN (PHOBIUS); TRANSMEMBRANE (PHOBIUS); NON_CYTOPLASMIC_DOMAIN (PHOBIUS); IPR000618 (PROSITE_PROFILES); TMhelix (TMHMM); TMhelix (TMHMM)	Yes	Yes	No	-
1665	Mcal_1665	Contig548.Newo100p95.cap3o60p95	1340	No	IV	-	SIGNAL_PEPTIDE_C_REGION (PHOBIUS); SIGNAL_PEPTIDE_N_REGION (PHOBIUS); NON_CYTOPLASMIC_DOMAIN (PHOBIUS); SIGNAL_PEPTIDE (PHOBIUS); SIGNAL_PEPTIDE_H_REGION (PHOBIUS); SignalP-noTM (SIGNALP_EUK); TMhelix (TMHMM)	Yes	No	Yes	-
1666	Mcal_1666	Contig549.Newo100p95.cap3o60p95	696	No	IV	-	-	Yes	No	No	-
1667	Mcal_1667	Contig550.Newo100p95.cap3o60p95	1108	No	IV	F:GO:0005507; C:GO:0005615; F:GO:0031404; F:GO:0005344; F:GO:0016491; P:GO:0015671; P:GO:0055114	G3DSA:3.30.420.40 (GENE3D); NON_CYTOPLASMIC_DOMAIN (PHOBIUS); CYTOPLASMIC_DOMAIN (PHOBIUS); TRANSMEMBRANE (PHOBIUS)	Yes	Yes	Yes	-
1668	Mcal_1668	Contig552.Newo100p95.cap3o60p95	545	No	IV	F:GO:0005509	IPR011992 (G3DSA:1.10.238.GENE3D); IPR023298 (G3DSA:1.20.1110.GENE3D); PTHR23048 (PANTHER); PTHR23048:SF6 (PANTHER); CYTOPLASMIC_DOMAIN (PHOBIUS); TRANSMEMBRANE (PHOBIUS); NON_CYTOPLASMIC_DOMAIN (PHOBIUS); SSF81665 (SUPERFAMILY); SSF47473 (SUPERFAMILY); TMhelix (TMHMM)	Yes	Yes	No	-
1669	Mcal_1669	Contig553.Newo100p95.cap3o60p95	630	No	IV	-	SIGNAL_PEPTIDE_H_REGION (PHOBIUS); NON_CYTOPLASMIC_DOMAIN (PHOBIUS); SIGNAL_PEPTIDE_N_REGION (PHOBIUS); SIGNAL_PEPTIDE_C_REGION (PHOBIUS); SIGNAL_PEPTIDE (PHOBIUS); SignalP-noTM (SIGNALP_EUK); TMhelix (TMHMM)	Yes	No	No	-
1670	Mcal_1670	Contig554.Newo100p95.cap3o60p95	571	No	IV	F:GO:0042302	TRANSMEMBRANE (PHOBIUS); CYTOPLASMIC_DOMAIN (PHOBIUS); NON_CYTOPLASMIC_DOMAIN (PHOBIUS); TMhelix (TMHMM)	Yes	No	No	-
1671	Mcal_1671	Contig556.Newo100p95.cap3o60p95	549	No	IV	-	-	Yes	No	No	-
1672	Mcal_1672	Contig60.Newo100p95.cap3o60p95	2513	No	IV	F:GO:0005507; C:GO:0005615; F:GO:0031404; F:GO:0005344; F:GO:0016491; P:GO:0015671; P:GO:0055114	IPR013788 (PRINTS); IPR005203 (G3DSA:2.60.40.GENE3D); IPR005204 (PFAM); IPR005204 (G3DSA:1.20.1370.GENE3D); IPR005203 (PFAM); IPR008922 (G3DSA:1.10.1280.GENE3D); IPR000896 (PFAM); IPR013788 (PANTHER); PTHR11511:SF4 (PANTHER); IPR013788 (PROSITE_PATTERNS); IPR013788 (PROSITE_PATTERNS); IPR002227 (PROSITE_PATTERNS); IPR008922 (SUPERFAMILY); IPR005204 (SUPERFAMILY); IPR014756 (SUPERFAMILY)	Yes	No	No	-
1673	Mcal_1673	Contig696.Newo100p95.cap3o60p95	199	No	IV	-	CYTOPLASMIC_DOMAIN (PHOBIUS); TRANSMEMBRANE (PHOBIUS); NON_CYTOPLASMIC_DOMAIN (PHOBIUS); TMhelix (TMHMM)	No	No	No	-
1674	Mcal_1674	Contig698.Newo100p95.cap3o60p95	1081	No	IV	F:GO:0005507; C:GO:0005615; F:GO:0031404; F:GO:0005344; F:GO:0016491; P:GO:0015671; P:GO:0055114	SIGNAL_PEPTIDE_C_REGION (PHOBIUS); SIGNAL_PEPTIDE_N_REGION (PHOBIUS); NON_CYTOPLASMIC_DOMAIN (PHOBIUS); SIGNAL_PEPTIDE (PHOBIUS); SIGNAL_PEPTIDE_H_REGION (PHOBIUS); SignalP-TM (SIGNALP_GRAM_POSITIVE); SignalP-noTM (SIGNALP_EUK)	Yes	No	No	-
1675	Mcal_1675	Contig700.Newo100p95.cap3o60p95	561	No	IV	-	-	Yes	No	No	-
1676	Mcal_1676	Contig701.Newo100p95.cap3o60p95	345	No	IV	-	NON_CYTOPLASMIC_DOMAIN (PHOBIUS); CYTOPLASMIC_DOMAIN (PHOBIUS); TRANSMEMBRANE (PHOBIUS); TMhelix (TMHMM)	No	No	No	-
1677	Mcal_1677	Contig702.Newo100p95.cap3o60p95	563	No	IV	-	-	Yes	No	No	-
1678	Mcal_1678	Contig704.Newo100p95.cap3o60p95	600	No	IV	F:GO:0003779; C:GO:0016459; F:GO:0005524; F:GO:0003774; F:GO:0032440; P:GO:0055114	Coil (COILS); G3DSA:1.20.5.340 (GENE3D); SSF90257 (SUPERFAMILY)	Yes	Yes	No	-
1679	Mcal_1679	Contig707.Newo100p95.cap3o60p95	1886	No	IV	-	NON_CYTOPLASMIC_DOMAIN (PHOBIUS); SIGNAL_PEPTIDE_N_REGION (PHOBIUS); SIGNAL_PEPTIDE (PHOBIUS); SIGNAL_PEPTIDE_C_REGION (PHOBIUS); SIGNAL_PEPTIDE_H_REGION (PHOBIUS); SignalP-noTM (SIGNALP_EUK)	Yes	No	Yes	-
1680	Mcal_1680	Contig708.Newo100p95.cap3o60p95	316	No	IV	-	TRANSMEMBRANE (PHOBIUS); CYTOPLASMIC_DOMAIN (PHOBIUS); NON_CYTOPLASMIC_DOMAIN (PHOBIUS); TMhelix (TMHMM)	Yes	Yes	No	-
1681	Mcal_1681	Contig709.Newo100p95.cap3o60p95	503	No	IV	-	TRANSMEMBRANE (PHOBIUS); SIGNAL_PEPTIDE_N_REGION (PHOBIUS); NON_CYTOPLASMIC_DOMAIN (PHOBIUS); SIGNAL_PEPTIDE_C_REGION (PHOBIUS); SIGNAL_PEPTIDE (PHOBIUS); CYTOPLASMIC_DOMAIN (PHOBIUS); SIGNAL_PEPTIDE_H_REGION (PHOBIUS); SignalP-noTM (SIGNALP_EUK)	No	No	No	-
1682	Mcal_1682	Contig710.Newo100p95.cap3o60p95	551	No	IV	-	-	Yes	No	No	-
1683	Mcal_1683	Contig713.Newo100p95.cap3o60p95	325	No	IV	-	-	Yes	Yes	Yes	-
1684	Mcal_1684	Contig714.Newo100p95.cap3o60p95	945	No	IV	F:GO:0016787; F:GO:0004104; F:GO:0003990; P:GO:0001507	IPR029058 (G3DSA:3.40.50.GENE3D); IPR002018 (PFAM); PTHR11559 (PANTHER); PTHR11559:SF154 (PANTHER); NON_CYTOPLASMIC_DOMAIN (PHOBIUS); CYTOPLASMIC_DOMAIN (PHOBIUS); TRANSMEMBRANE (PHOBIUS); IPR029058 (SUPERFAMILY)	Yes	No	No	map00564
1685	Mcal_1685	Contig718.Newo100p95.cap3o60p95	580	No	IV	-	-	Yes	No	No	-
1686	Mcal_1686	Contig719.Newo100p95.cap3o60p95	1058	No	IV	-	IPR014878 (PFAM); PTHR15854 (PANTHER); IPR011038 (SUPERFAMILY)	Yes	No	No	-
1687	Mcal_1687	Contig727.Newo100p95.cap3o60p95	486	No	IV	F:GO:0005507; C:GO:0005615; F:GO:0031404; F:GO:0005344; F:GO:0016491; P:GO:0015671; P:GO:0055114	IPR008922 (G3DSA:1.10.1280.GENE3D); IPR000896 (PFAM); IPR013788 (PANTHER); PTHR11511:SF4 (PANTHER); IPR013788 (PROSITE_PATTERNS); IPR008922 (SUPERFAMILY)	Yes	No	No	-
1688	Mcal_1688	Contig733.Newo100p95.cap3o60p95	984	No	IV	C:GO:0005840; F:GO:0003735; P:GO:0006412	IPR014722 (G3DSA:2.30.30.GENE3D); IPR000915 (PFAM); IPR000915 (PANTHER); IPR000915 (PROSITE_PATTERNS); IPR008991 (SUPERFAMILY)	Yes	Yes	Yes	-
1689	Mcal_1689	Contig737.Newo100p95.cap3o60p95	826	No	IV	F:GO:0043565; P:GO:0006355; F:GO:0003700	IPR001356 (SMART); IPR001356 (PFAM); IPR009057 (G3DSA:1.10.10.GENE3D); PTHR21408 (PANTHER); IPR001356 (PROSITE_PROFILES); IPR009057 (SUPERFAMILY)	Yes	No	No	-
1690	Mcal_1690	Contig739.Newo100p95.cap3o60p95	518	No	IV	-	-	Yes	No	No	-
1691	Mcal_1691	Contig742.Newo100p95.cap3o60p95	1698	No	IV	-	SIGNAL_PEPTIDE_H_REGION (PHOBIUS); SIGNAL_PEPTIDE_N_REGION (PHOBIUS); NON_CYTOPLASMIC_DOMAIN (PHOBIUS); TRANSMEMBRANE (PHOBIUS); SIGNAL_PEPTIDE_C_REGION (PHOBIUS); SIGNAL_PEPTIDE (PHOBIUS); CYTOPLASMIC_DOMAIN (PHOBIUS); TMhelix (TMHMM); TMhelix (TMHMM)	Yes	No	No	-
1692	Mcal_1692	Contig743.Newo100p95.cap3o60p95	417	No	IV	F:GO:0032440; P:GO:0055114; F:GO:0005509	IPR002048 (SMART); IPR011992 (G3DSA:1.10.238.GENE3D); PF13833 (PFAM); PTHR23050:SF16 (PANTHER); PTHR23050 (PANTHER); IPR018247 (PROSITE_PATTERNS); IPR002048 (PROSITE_PROFILES); IPR002048 (PROSITE_PROFILES); SSF47473 (SUPERFAMILY)	Yes	No	No	-
1693	Mcal_1693	Contig746.Newo100p95.cap3o60p95	398	No	IV	-	-	Yes	No	No	-
1694	Mcal_1694	Contig748.Newo100p95.cap3o60p95	511	No	IV	-	-	No	No	No	-
1695	Mcal_1695	Contig749.Newo100p95.cap3o60p95	725	No	IV	-	-	Yes	Yes	No	-
1696	Mcal_1696	Contig755.Newo100p95.cap3o60p95	700	No	IV	F:GO:0005507; C:GO:0005615; F:GO:0031404; F:GO:0005344; F:GO:0016491; P:GO:0015671; P:GO:0055114; P:GO:0006183; F:GO:0004550; P:GO:0006228; F:GO:0005524; P:GO:0006241; P:GO:0006165	IPR001564 (G3DSA:3.30.70.GENE3D); SIGNAL_PEPTIDE_C_REGION (PHOBIUS); SIGNAL_PEPTIDE_N_REGION (PHOBIUS); NON_CYTOPLASMIC_DOMAIN (PHOBIUS); SIGNAL_PEPTIDE (PHOBIUS); SIGNAL_PEPTIDE_H_REGION (PHOBIUS); SignalP-noTM (SIGNALP_EUK); IPR001564 (SUPERFAMILY)	Yes	Yes	Yes	map00230 map00240
1697	Mcal_1697	Contig757.Newo100p95.cap3o60p95	434	No	IV	P:GO:0006744; F:GO:0046914; F:GO:0016491; P:GO:0055114	SIGNAL_PEPTIDE_C_REGION (PHOBIUS); NON_CYTOPLASMIC_DOMAIN (PHOBIUS); SIGNAL_PEPTIDE (PHOBIUS); SIGNAL_PEPTIDE_N_REGION (PHOBIUS); SIGNAL_PEPTIDE_H_REGION (PHOBIUS); SignalP-noTM (SIGNALP_EUK); SignalP-noTM (SIGNALP_GRAM_NEGATIVE); TMhelix (TMHMM); TMhelix (TMHMM)	Yes	No	No	-
1698	Mcal_1698	Contig758.Newo100p95.cap3o60p95	398	No	IV	-	-	Yes	Yes	No	-
1699	Mcal_1699	Contig759.Newo100p95.cap3o60p95	766	No	IV	F:GO:0005515	IPR001368 (PROSITE_PATTERNS); NON_CYTOPLASMIC_DOMAIN (PHOBIUS); CYTOPLASMIC_DOMAIN (PHOBIUS); TRANSMEMBRANE (PHOBIUS); TRANSMEMBRANE (PHOBIUS); CYTOPLASMIC_DOMAIN (PHOBIUS); TMhelix (TMHMM); TMhelix (TMHMM)	Yes	No	No	-
1700	Mcal_1700	Contig76.Newo100p95.cap3o60p95	1573	No	IV	F:GO:0005509	IPR011992 (G3DSA:1.10.238.GENE3D); IPR011992 (G3DSA:1.10.238.GENE3D); PTHR23048:SF6 (PANTHER); PTHR23048 (PANTHER); IPR002048 (PROSITE_PROFILES); IPR002048 (PROSITE_PROFILES); SSF47473 (SUPERFAMILY)	Yes	Yes	No	-
1701	Mcal_1701	Contig761.Newo100p95.cap3o60p95	638	No	IV	-	TRANSMEMBRANE (PHOBIUS); NON_CYTOPLASMIC_DOMAIN (PHOBIUS); CYTOPLASMIC_DOMAIN (PHOBIUS); SignalP-noTM (SIGNALP_EUK)	Yes	No	No	-
1702	Mcal_1702	Contig763.Newo100p95.cap3o60p95	226	No	IV	-	G3DSA:1.10.8.20 (GENE3D); IPR011074 (SUPERFAMILY)	Yes	No	No	-
1703	Mcal_1703	Contig766.Newo100p95.cap3o60p95	939	No	IV	C:GO:0005840; F:GO:0003735; P:GO:0006412; F:GO:0004563; P:GO:0005975	IPR025705 (PRINTS); IPR015883 (PFAM); IPR001210 (G3DSA:1.10.60.GENE3D); IPR013781 (G3DSA:3.20.20.GENE3D); IPR001210 (PFAM); PTHR10732:SF0 (PANTHER); IPR001210 (PANTHER); IPR018273 (PROSITE_PATTERNS); IPR001210 (HAMAP); IPR017853 (SUPERFAMILY); IPR001210 (SUPERFAMILY)	Yes	No	No	map00520 map00513 map00511 map00604 map00603 map00531
1704	Mcal_1704	Contig772.Newo100p95.cap3o60p95	994	No	IV	-	-	Yes	No	No	-
1705	Mcal_1705	Contig775.Newo100p95.cap3o60p95	813	No	IV	C:GO:0005861	Coil (COILS); Coil (COILS); G3DSA:1.20.5.350 (GENE3D); IPR001978 (PFAM); PTHR13738 (PANTHER); SSF90250 (SUPERFAMILY)	Yes	No	No	-
1706	Mcal_1706	Contig779.Newo100p95.cap3o60p95	653	No	IV	-	SIGNAL_PEPTIDE_N_REGION (PHOBIUS); SIGNAL_PEPTIDE_H_REGION (PHOBIUS); SIGNAL_PEPTIDE (PHOBIUS); SIGNAL_PEPTIDE_C_REGION (PHOBIUS); NON_CYTOPLASMIC_DOMAIN (PHOBIUS); SignalP-noTM (SIGNALP_GRAM_NEGATIVE); SignalP-noTM (SIGNALP_EUK); SignalP-TM (SIGNALP_GRAM_POSITIVE); TMhelix (TMHMM); TMhelix (TMHMM)	Yes	No	No	-
1707	Mcal_1707	Contig780.Newo100p95.cap3o60p95	565	No	IV	-	SIGNAL_PEPTIDE_C_REGION (PHOBIUS); SIGNAL_PEPTIDE (PHOBIUS); NON_CYTOPLASMIC_DOMAIN (PHOBIUS); SIGNAL_PEPTIDE_N_REGION (PHOBIUS); SIGNAL_PEPTIDE_H_REGION (PHOBIUS)	Yes	No	No	-
1708	Mcal_1708	Contig789.Newo100p95.cap3o60p95	432	No	IV	-	-	No	No	No	-
1709	Mcal_1709	Contig79.Newo100p95.cap3o60p95	868	No	IV	F:GO:0005509	SIGNAL_PEPTIDE_N_REGION (PHOBIUS); SIGNAL_PEPTIDE_C_REGION (PHOBIUS); SIGNAL_PEPTIDE_H_REGION (PHOBIUS); SIGNAL_PEPTIDE (PHOBIUS); NON_CYTOPLASMIC_DOMAIN (PHOBIUS); SignalP-TM (SIGNALP_EUK); TMhelix (TMHMM)	Yes	Yes	No	-
1710	Mcal_1710	Contig790.Newo100p95.cap3o60p95	492	No	IV	C:GO:0043231; C:GO:0016020; F:GO:0050660; P:GO:0055114; F:GO:0004499; F:GO:0050661	G3DSA:3.50.50.60 (GENE3D); IPR020946 (PFAM); PTHR23023 (PANTHER); SSF51905 (SUPERFAMILY)	Yes	No	No	map00982
1711	Mcal_1711	Contig791.Newo100p95.cap3o60p95	1251	No	IV	-	SIGNAL_PEPTIDE_N_REGION (PHOBIUS); SIGNAL_PEPTIDE (PHOBIUS); NON_CYTOPLASMIC_DOMAIN (PHOBIUS); SIGNAL_PEPTIDE_C_REGION (PHOBIUS); SIGNAL_PEPTIDE_H_REGION (PHOBIUS); SignalP-TM (SIGNALP_GRAM_POSITIVE); SignalP-noTM (SIGNALP_GRAM_NEGATIVE); SignalP-noTM (SIGNALP_EUK)	Yes	No	No	-
1712	Mcal_1712	Contig792.Newo100p95.cap3o60p95	660	No	IV	-	-	Yes	No	No	-
1713	Mcal_1713	Contig798.Newo100p95.cap3o60p95	1014	No	IV	C:GO:0005840; F:GO:0003735; P:GO:0006412	NON_CYTOPLASMIC_DOMAIN (PHOBIUS); SIGNAL_PEPTIDE_N_REGION (PHOBIUS); SIGNAL_PEPTIDE_H_REGION (PHOBIUS); SIGNAL_PEPTIDE_C_REGION (PHOBIUS); SIGNAL_PEPTIDE (PHOBIUS); TMhelix (TMHMM)	Yes	Yes	Yes	-
1714	Mcal_1714	Contig799.Newo100p95.cap3o60p95	289	No	IV	-	-	No	No	No	-
1715	Mcal_1715	Contig800.Newo100p95.cap3o60p95	1031	No	IV	C:GO:0005861; P:GO:0006937	-	Yes	No	No	-
1716	Mcal_1716	Contig802.Newo100p95.cap3o60p95	751	No	IV	C:GO:0005829; C:GO:0030863; C:GO:0030424; F:GO:0019894; F:GO:0030957; C:GO:0070062; C:GO:0035267; F:GO:0005524; P:GO:0007409; F:GO:0050998; F:GO:0019901; C:GO:0030529; C:GO:0070688; C:GO:0014069	IPR004000 (PRINTS); G3DSA:3.30.420.40 (GENE3D); IPR004000 (PFAM); IPR004000 (PANTHER); PTHR11937:SF188 (PANTHER); IPR020902 (PROSITE_PATTERNS); SSF53067 (SUPERFAMILY)	Yes	Yes	Yes	-
1717	Mcal_1717	Contig803.Newo100p95.cap3o60p95	354	No	IV	-	-	Yes	No	No	-
1718	Mcal_1718	Contig805.Newo100p95.cap3o60p95	683	No	IV	-	-	Yes	No	No	-
1719	Mcal_1719	Contig81.Newo100p95.cap3o60p95	1463	No	IV	C:GO:0005874; P:GO:0051258; P:GO:0006184; P:GO:0007017; F:GO:0003924; F:GO:0005200; C:GO:0005737; F:GO:0005525	IPR002453 (PRINTS); IPR000217 (PRINTS); IPR003008 (G3DSA:3.40.50.GENE3D); IPR003008 (PFAM); PTHR11588:SF54 (PANTHER); IPR000217 (PANTHER); IPR013838 (PROSITE_PATTERNS); IPR003008 (SUPERFAMILY)	Yes	Yes	Yes	-
1720	Mcal_1720	Contig812.Newo100p95.cap3o60p95	680	No	IV	P:GO:0006879; F:GO:0016491; F:GO:0008199; P:GO:0006826; P:GO:0055114	IPR008331 (PFAM); IPR012347 (G3DSA:1.20.1260.GENE3D); IPR001519 (PANTHER); PTHR11431:SF37 (PANTHER); IPR009040 (PROSITE_PROFILES); IPR009078 (SUPERFAMILY)	Yes	No	No	-
1721	Mcal_1721	Contig813.Newo100p95.cap3o60p95	546	No	IV	-	-	No	No	No	-
1722	Mcal_1722	Contig816.Newo100p95.cap3o60p95	558	No	IV	F:GO:0005507; F:GO:0031404	IPR005203 (G3DSA:2.60.40.GENE3D); IPR005203 (PFAM); IPR014756 (SUPERFAMILY)	Yes	No	No	-
1723	Mcal_1723	Contig818.Newo100p95.cap3o60p95	688	No	IV	C:GO:0005840	IPR005326 (PFAM); PTHR12146 (PANTHER)	Yes	No	No	-
1724	Mcal_1724	Contig819.Newo100p95.cap3o60p95	1490	No	IV	F:GO:0003746; P:GO:0006414; P:GO:0006184; F:GO:0003924; F:GO:0005525	NON_CYTOPLASMIC_DOMAIN (PHOBIUS); SIGNAL_PEPTIDE_C_REGION (PHOBIUS); SIGNAL_PEPTIDE (PHOBIUS); SIGNAL_PEPTIDE_N_REGION (PHOBIUS); SIGNAL_PEPTIDE_H_REGION (PHOBIUS); SignalP-noTM (SIGNALP_EUK)	Yes	Yes	Yes	-
1725	Mcal_1725	Contig82.Newo100p95.cap3o60p95	1495	No	IV	F:GO:0008270; F:GO:0016740	SIGNAL_PEPTIDE_C_REGION (PHOBIUS); NON_CYTOPLASMIC_DOMAIN (PHOBIUS); SIGNAL_PEPTIDE_H_REGION (PHOBIUS); SIGNAL_PEPTIDE_N_REGION (PHOBIUS); SIGNAL_PEPTIDE (PHOBIUS); SignalP-noTM (SIGNALP_EUK)	Yes	Yes	No	-
1726	Mcal_1726	Contig822.Newo100p95.cap3o60p95	716	No	IV	-	Coil (COILS); IPR000533 (PFAM); G3DSA:1.20.5.340 (GENE3D); PTHR19269:SF44 (PANTHER); PTHR19269 (PANTHER); SSF57997 (SUPERFAMILY)	Yes	No	No	-
1727	Mcal_1727	Contig823.Newo100p95.cap3o60p95	537	No	IV	-	-	Yes	No	No	-
1728	Mcal_1728	Contig824.Newo100p95.cap3o60p95	703	No	IV	-	-	Yes	No	No	-
1729	Mcal_1729	Contig826.Newo100p95.cap3o60p95	888	No	IV	F:GO:0005509	-	Yes	Yes	No	-
1730	Mcal_1730	Contig828.Newo100p95.cap3o60p95	998	No	IV	C:GO:0005856; C:GO:0005737; F:GO:0005524	NON_CYTOPLASMIC_DOMAIN (PHOBIUS); CYTOPLASMIC_DOMAIN (PHOBIUS); TRANSMEMBRANE (PHOBIUS); NON_CYTOPLASMIC_DOMAIN (PHOBIUS); TRANSMEMBRANE (PHOBIUS); TMhelix (TMHMM); TMhelix (TMHMM); TMhelix (TMHMM)	Yes	Yes	Yes	-
1731	Mcal_1731	Contig829.Newo100p95.cap3o60p95	1169	No	IV	F:GO:0016788	SIGNAL_PEPTIDE_H_REGION (PHOBIUS); SIGNAL_PEPTIDE (PHOBIUS); NON_CYTOPLASMIC_DOMAIN (PHOBIUS); SIGNAL_PEPTIDE_N_REGION (PHOBIUS); SIGNAL_PEPTIDE_C_REGION (PHOBIUS); SignalP-TM (SIGNALP_GRAM_POSITIVE); SignalP-noTM (SIGNALP_EUK); TMhelix (TMHMM)	Yes	Yes	No	-
1732	Mcal_1732	Contig830.Newo100p95.cap3o60p95	408	No	IV	-	TRANSMEMBRANE (PHOBIUS); CYTOPLASMIC_DOMAIN (PHOBIUS); NON_CYTOPLASMIC_DOMAIN (PHOBIUS); TMhelix (TMHMM)	No	No	No	-
1733	Mcal_1733	Contig833.Newo100p95.cap3o60p95	432	No	IV	C:GO:0005856; C:GO:0005737; F:GO:0005524	IPR004000 (PFAM); G3DSA:3.30.420.40 (GENE3D); PTHR11937:SF188 (PANTHER); IPR004000 (PANTHER); SSF53067 (SUPERFAMILY)	Yes	Yes	Yes	-
1734	Mcal_1734	Contig834.Newo100p95.cap3o60p95	610	No	IV	P:GO:0015031; C:GO:0016021	-	Yes	No	Yes	-
1735	Mcal_1735	Contig837.Newo100p95.cap3o60p95	774	No	IV	P:GO:0071704; P:GO:0044238; P:GO:0044237; F:GO:0005525	IPR004161 (PFAM); G3DSA:2.40.30.10 (GENE3D); IPR004160 (PFAM); G3DSA:2.40.30.10 (GENE3D); PTHR23115:SF112 (PANTHER); PTHR23115 (PANTHER); IPR009001 (SUPERFAMILY); IPR009000 (SUPERFAMILY)	Yes	No	Yes	-
1736	Mcal_1736	Contig838.Newo100p95.cap3o60p95	677	No	IV	C:GO:0005840; F:GO:0003735; P:GO:0006412	SIGNAL_PEPTIDE_N_REGION (PHOBIUS); NON_CYTOPLASMIC_DOMAIN (PHOBIUS); SIGNAL_PEPTIDE_C_REGION (PHOBIUS); SIGNAL_PEPTIDE (PHOBIUS); SIGNAL_PEPTIDE_H_REGION (PHOBIUS); SignalP-noTM (SIGNALP_EUK)	Yes	No	No	-
1737	Mcal_1737	Contig843.Newo100p95.cap3o60p95	781	No	IV	-	G3DSA:3.30.420.40 (GENE3D); IPR004000 (PFAM); IPR004000 (PANTHER); PTHR11937:SF165 (PANTHER); SignalP-noTM (SIGNALP_EUK)	Yes	No	No	-
1738	Mcal_1738	Contig847.Newo100p95.cap3o60p95	367	No	IV	F:GO:0003735; P:GO:0006412; C:GO:0015935; C:GO:0005840	IPR027486 (G3DSA:3.30.70.GENE3D)	Yes	No	No	-
1739	Mcal_1739	Contig849.Newo100p95.cap3o60p95	545	No	IV	F:GO:0005507; C:GO:0005615; F:GO:0031404; F:GO:0005344; F:GO:0016491; P:GO:0015671; P:GO:0055114	-	Yes	No	No	-
1740	Mcal_1740	Contig851.Newo100p95.cap3o60p95	520	No	IV	-	-	No	No	No	-
1741	Mcal_1741	Contig852.Newo100p95.cap3o60p95	554	No	IV	P:GO:0015031; F:GO:0005093	IPR000806 (PRINTS); IPR018203 (PFAM); PTHR11787:SF8 (PANTHER); PTHR11787 (PANTHER); SSF51905 (SUPERFAMILY); SSF54373 (SUPERFAMILY)	Yes	No	Yes	-
1742	Mcal_1742	Contig854.Newo100p95.cap3o60p95	560	No	IV	-	-	Yes	No	No	-
1743	Mcal_1743	Contig856.Newo100p95.cap3o60p95	945	No	IV	-	TRANSMEMBRANE (PHOBIUS); CYTOPLASMIC_DOMAIN (PHOBIUS); TRANSMEMBRANE (PHOBIUS); CYTOPLASMIC_DOMAIN (PHOBIUS); NON_CYTOPLASMIC_DOMAIN (PHOBIUS); TMhelix (TMHMM); TMhelix (TMHMM)	Yes	No	No	-
1744	Mcal_1744	Contig857.Newo100p95.cap3o60p95	560	No	IV	P:GO:0006165; F:GO:0004550; P:GO:0006228; F:GO:0005524; P:GO:0006183; P:GO:0006241	SIGNAL_PEPTIDE_C_REGION (PHOBIUS); SIGNAL_PEPTIDE (PHOBIUS); SIGNAL_PEPTIDE_N_REGION (PHOBIUS); NON_CYTOPLASMIC_DOMAIN (PHOBIUS); SIGNAL_PEPTIDE_H_REGION (PHOBIUS); SignalP-noTM (SIGNALP_EUK); SignalP-TM (SIGNALP_GRAM_POSITIVE); SignalP-noTM (SIGNALP_GRAM_NEGATIVE)	Yes	Yes	Yes	map00230 map00240
1745	Mcal_1745	Contig859.Newo100p95.cap3o60p95	957	No	IV	F:GO:0005509	-	Yes	Yes	No	-
1746	Mcal_1746	Contig86.Newo100p95.cap3o60p95	1432	No	IV	-	SIGNAL_PEPTIDE_H_REGION (PHOBIUS); SIGNAL_PEPTIDE_C_REGION (PHOBIUS); SIGNAL_PEPTIDE_N_REGION (PHOBIUS); SIGNAL_PEPTIDE (PHOBIUS); NON_CYTOPLASMIC_DOMAIN (PHOBIUS); SignalP-noTM (SIGNALP_EUK); IPR029034 (SUPERFAMILY)	Yes	No	No	-
1747	Mcal_1747	Contig860.Newo100p95.cap3o60p95	312	No	IV	-	G3DSA:3.30.420.40 (GENE3D); IPR004000 (PFAM); PTHR11937:SF165 (PANTHER); IPR004000 (PANTHER); CYTOPLASMIC_DOMAIN (PHOBIUS); TRANSMEMBRANE (PHOBIUS); CYTOPLASMIC_DOMAIN (PHOBIUS); NON_CYTOPLASMIC_DOMAIN (PHOBIUS); TRANSMEMBRANE (PHOBIUS); SSF53067 (SUPERFAMILY); TMhelix (TMHMM); TMhelix (TMHMM)	Yes	Yes	Yes	-
1748	Mcal_1748	Contig862.Newo100p95.cap3o60p95	670	No	IV	C:GO:0005874; P:GO:0051258; P:GO:0006184; P:GO:0007017; F:GO:0003924; F:GO:0005200; F:GO:0005525	-	Yes	Yes	Yes	-
1749	Mcal_1749	Contig863.Newo100p95.cap3o60p95	922	No	IV	F:GO:0005507; C:GO:0005615; F:GO:0031404; F:GO:0005344; F:GO:0016491; P:GO:0015671; P:GO:0055114	SIGNAL_PEPTIDE_N_REGION (PHOBIUS); NON_CYTOPLASMIC_DOMAIN (PHOBIUS); SIGNAL_PEPTIDE_C_REGION (PHOBIUS); SIGNAL_PEPTIDE (PHOBIUS); SIGNAL_PEPTIDE_H_REGION (PHOBIUS)	Yes	No	No	-
1750	Mcal_1750	Contig865.Newo100p95.cap3o60p95	826	No	IV	P:GO:0009060; C:GO:0005743; C:GO:0070469; F:GO:0009055; F:GO:0005506; P:GO:0006119; F:GO:0020037; C:GO:0016021; P:GO:0022900; F:GO:0004129	Coil (COILS); CYTOPLASMIC_DOMAIN (PHOBIUS); NON_CYTOPLASMIC_DOMAIN (PHOBIUS); TRANSMEMBRANE (PHOBIUS); TMhelix (TMHMM)	Yes	No	No	map00190
1751	Mcal_1751	Contig869.Newo100p95.cap3o60p95	709	No	IV	F:GO:0005507; C:GO:0005615; F:GO:0031404; F:GO:0005344; F:GO:0016491; P:GO:0015671; P:GO:0055114	IPR005203 (PFAM); IPR005203 (G3DSA:2.60.40.GENE3D); IPR013788 (PANTHER); PTHR11511:SF4 (PANTHER); IPR014756 (SUPERFAMILY)	Yes	No	No	-
1752	Mcal_1752	Contig871.Newo100p95.cap3o60p95	478	No	IV	F:GO:0005509	-	Yes	No	No	-
1753	Mcal_1753	Contig875.Newo100p95.cap3o60p95	1619	No	IV	C:GO:0000786; F:GO:0003677; P:GO:0006334; C:GO:0005634; F:GO:0046982	NON_CYTOPLASMIC_DOMAIN (PHOBIUS); SIGNAL_PEPTIDE_H_REGION (PHOBIUS); SIGNAL_PEPTIDE_N_REGION (PHOBIUS); SIGNAL_PEPTIDE (PHOBIUS); SIGNAL_PEPTIDE_C_REGION (PHOBIUS); SignalP-noTM (SIGNALP_EUK)	Yes	No	No	-
1754	Mcal_1754	Contig879.Newo100p95.cap3o60p95	540	No	IV	P:GO:0006096; F:GO:0004332	SignalP-noTM (SIGNALP_EUK)	Yes	Yes	No	map00030 map00680 map00710 map00010 map00051
1755	Mcal_1755	Contig881.Newo100p95.cap3o60p95	673	No	IV	-	IPR004000 (PFAM); G3DSA:3.30.420.40 (GENE3D); IPR004000 (PANTHER); PTHR11937:SF187 (PANTHER); SSF53067 (SUPERFAMILY)	Yes	Yes	Yes	-
1756	Mcal_1756	Contig882.Newo100p95.cap3o60p95	535	No	IV	C:GO:0005840; F:GO:0003735; P:GO:0006412	SIGNAL_PEPTIDE_N_REGION (PHOBIUS); SIGNAL_PEPTIDE_H_REGION (PHOBIUS); NON_CYTOPLASMIC_DOMAIN (PHOBIUS); SIGNAL_PEPTIDE_C_REGION (PHOBIUS); SIGNAL_PEPTIDE (PHOBIUS); TMhelix (TMHMM)	Yes	No	No	-
1757	Mcal_1757	Contig885.Newo100p95.cap3o60p95	967	No	IV	C:GO:0005840; F:GO:0003735; P:GO:0006412	Coil (COILS); IPR000196 (PFAM); IPR015972 (G3DSA:1.10.1650.GENE3D); IPR015974 (G3DSA:1.10.1200.GENE3D); PTHR10722 (PANTHER); IPR023638 (PROSITE_PATTERNS); IPR027547 (HAMAP); IPR000196 (SUPERFAMILY)	Yes	No	No	-
1758	Mcal_1758	Contig886.Newo100p95.cap3o60p95	549	No	IV	F:GO:0004867	G3DSA:2.30.39.10 (GENE3D); IPR023796 (PFAM); IPR023796 (SUPERFAMILY)	Yes	No	No	-
1759	Mcal_1759	Contig887.Newo100p95.cap3o60p95	367	No	IV	F:GO:0005509	-	Yes	No	No	-
1760	Mcal_1760	Contig892.Newo100p95.cap3o60p95	582	No	IV	-	CYTOPLASMIC_DOMAIN (PHOBIUS); NON_CYTOPLASMIC_DOMAIN (PHOBIUS); TRANSMEMBRANE (PHOBIUS); TMhelix (TMHMM)	No	No	No	-
1761	Mcal_1761	Contig895.Newo100p95.cap3o60p95	535	No	IV	F:GO:0008270	IPR001781 (SMART); IPR001781 (PFAM); IPR001781 (G3DSA:2.10.110.GENE3D); PTHR24214:SF29 (PANTHER); PTHR24214 (PANTHER); IPR001781 (PROSITE_PROFILES); SSF57716 (SUPERFAMILY)	Yes	No	No	-
1762	Mcal_1762	Contig896.Newo100p95.cap3o60p95	444	No	IV	F:GO:0005507; C:GO:0005615; F:GO:0031404; F:GO:0005344; F:GO:0016491; P:GO:0015671; P:GO:0055114	IPR000896 (PFAM); IPR008922 (G3DSA:1.10.1280.GENE3D); IPR008922 (SUPERFAMILY)	Yes	No	No	-
1763	Mcal_1763	Contig897.Newo100p95.cap3o60p95	814	No	IV	-	SIGNAL_PEPTIDE_N_REGION (PHOBIUS); SIGNAL_PEPTIDE_C_REGION (PHOBIUS); NON_CYTOPLASMIC_DOMAIN (PHOBIUS); SIGNAL_PEPTIDE_H_REGION (PHOBIUS); SIGNAL_PEPTIDE (PHOBIUS)	Yes	No	No	-
1764	Mcal_1764	Contig898.Newo100p95.cap3o60p95	1226	No	IV	F:GO:0005507; C:GO:0005615; F:GO:0031404; F:GO:0005344; F:GO:0016491; P:GO:0015671; P:GO:0055114	-	Yes	No	Yes	-
1765	Mcal_1765	Contig901.Newo100p95.cap3o60p95	723	No	IV	-	TRANSMEMBRANE (PHOBIUS); NON_CYTOPLASMIC_DOMAIN (PHOBIUS); CYTOPLASMIC_DOMAIN (PHOBIUS); TMhelix (TMHMM)	Yes	No	No	-
1766	Mcal_1766	Contig902.Newo100p95.cap3o60p95	611	No	IV	C:GO:0005861	-	Yes	No	No	-
1767	Mcal_1767	Contig908.Newo100p95.cap3o60p95	551	No	IV	F:GO:0043565; F:GO:0051287; F:GO:0004450; F:GO:0000287; C:GO:0005634; P:GO:0006102; F:GO:0046982; P:GO:0055114	-	Yes	No	Yes	map00720 map00480 map00020
1768	Mcal_1768	Contig910.Newo100p95.cap3o60p95	522	No	IV	P:GO:0006879; F:GO:0016491; F:GO:0008199; P:GO:0006826; P:GO:0055114	IPR008331 (PFAM); IPR012347 (G3DSA:1.20.1260.GENE3D); IPR001519 (PANTHER); IPR014034 (PROSITE_PATTERNS); IPR009040 (PROSITE_PROFILES); IPR009078 (SUPERFAMILY)	Yes	No	Yes	-
1769	Mcal_1769	Contig913.Newo100p95.cap3o60p95	407	No	IV	-	SIGNAL_PEPTIDE_N_REGION (PHOBIUS); SIGNAL_PEPTIDE (PHOBIUS); SIGNAL_PEPTIDE_C_REGION (PHOBIUS); NON_CYTOPLASMIC_DOMAIN (PHOBIUS); SIGNAL_PEPTIDE_H_REGION (PHOBIUS); SignalP-noTM (SIGNALP_GRAM_NEGATIVE); SignalP-TM (SIGNALP_GRAM_POSITIVE); SignalP-noTM (SIGNALP_EUK)	Yes	No	No	-
1770	Mcal_1770	Contig914.Newo100p95.cap3o60p95	456	No	IV	-	TRANSMEMBRANE (PHOBIUS); NON_CYTOPLASMIC_DOMAIN (PHOBIUS); CYTOPLASMIC_DOMAIN (PHOBIUS)	Yes	No	No	-
1771	Mcal_1771	Contig92.Newo100p95.cap3o60p95	984	No	IV	F:GO:0030170; F:GO:0004648; P:GO:0006564	TRANSMEMBRANE (PHOBIUS); NON_CYTOPLASMIC_DOMAIN (PHOBIUS); CYTOPLASMIC_DOMAIN (PHOBIUS); SignalP-TM (SIGNALP_EUK); TMhelix (TMHMM)	Yes	No	No	map00680 map00260 map00750
1772	Mcal_1772	Contig920.Newo100p95.cap3o60p95	1620	No	IV	-	TRANSMEMBRANE (PHOBIUS); NON_CYTOPLASMIC_DOMAIN (PHOBIUS); CYTOPLASMIC_DOMAIN (PHOBIUS); TRANSMEMBRANE (PHOBIUS); CYTOPLASMIC_DOMAIN (PHOBIUS)	Yes	No	No	-
1773	Mcal_1773	Contig921.Newo100p95.cap3o60p95	1386	No	IV	F:GO:0008270; F:GO:0016740	CYTOPLASMIC_DOMAIN (PHOBIUS); NON_CYTOPLASMIC_DOMAIN (PHOBIUS); TRANSMEMBRANE (PHOBIUS)	Yes	Yes	No	-
1774	Mcal_1774	Contig925.Newo100p95.cap3o60p95	315	No	IV	-	-	Yes	No	No	-
1775	Mcal_1775	Contig926.Newo100p95.cap3o60p95	293	No	IV	-	-	No	No	No	-
1776	Mcal_1776	Contig927.Newo100p95.cap3o60p95	594	No	IV	F:GO:0005507; C:GO:0005615; F:GO:0031404; F:GO:0005344; F:GO:0016491; P:GO:0015671; P:GO:0055114	NON_CYTOPLASMIC_DOMAIN (PHOBIUS); SIGNAL_PEPTIDE_N_REGION (PHOBIUS); SIGNAL_PEPTIDE_H_REGION (PHOBIUS); SIGNAL_PEPTIDE (PHOBIUS); SIGNAL_PEPTIDE_C_REGION (PHOBIUS)	Yes	No	No	-
1777	Mcal_1777	Contig928.Newo100p95.cap3o60p95	766	No	IV	-	CYTOPLASMIC_DOMAIN (PHOBIUS); NON_CYTOPLASMIC_DOMAIN (PHOBIUS); TRANSMEMBRANE (PHOBIUS); TMhelix (TMHMM)	Yes	No	No	-
1778	Mcal_1778	Contig929.Newo100p95.cap3o60p95	1162	No	IV	F:GO:0005509; F:GO:0005515	IPR003599 (SMART); IPR003598 (SMART); IPR002048 (SMART); IPR013783 (G3DSA:2.60.40.GENE3D); IPR013098 (PFAM); IPR011992 (G3DSA:1.10.238.GENE3D); PTHR23050 (PANTHER); PTHR23050:SF16 (PANTHER); IPR018247 (PROSITE_PATTERNS); IPR002048 (PROSITE_PROFILES); IPR007110 (PROSITE_PROFILES); SSF47473 (SUPERFAMILY); SSF48726 (SUPERFAMILY)	Yes	Yes	No	-
1779	Mcal_1779	Contig93.Newo100p95.cap3o60p95	614	No	IV	-	-	Yes	No	No	-
1780	Mcal_1780	Contig930.Newo100p95.cap3o60p95	659	No	IV	-	CYTOPLASMIC_DOMAIN (PHOBIUS); TRANSMEMBRANE (PHOBIUS); NON_CYTOPLASMIC_DOMAIN (PHOBIUS); TMhelix (TMHMM)	No	No	No	-
1781	Mcal_1781	Contig931.Newo100p95.cap3o60p95	1255	No	IV	-	SIGNAL_PEPTIDE_N_REGION (PHOBIUS); SIGNAL_PEPTIDE_C_REGION (PHOBIUS); NON_CYTOPLASMIC_DOMAIN (PHOBIUS); SIGNAL_PEPTIDE (PHOBIUS); SIGNAL_PEPTIDE_H_REGION (PHOBIUS); SignalP-noTM (SIGNALP_EUK)	Yes	No	No	-
1782	Mcal_1782	Contig932.Newo100p95.cap3o60p95	307	No	IV	-	-	No	No	No	-
1783	Mcal_1783	Contig933.Newo100p95.cap3o60p95	576	No	IV	-	SIGNAL_PEPTIDE_C_REGION (PHOBIUS); SIGNAL_PEPTIDE_N_REGION (PHOBIUS); NON_CYTOPLASMIC_DOMAIN (PHOBIUS); SIGNAL_PEPTIDE (PHOBIUS); SIGNAL_PEPTIDE_H_REGION (PHOBIUS); SignalP-noTM (SIGNALP_EUK)	Yes	No	No	-
1784	Mcal_1784	Contig934.Newo100p95.cap3o60p95	939	No	IV	-	NON_CYTOPLASMIC_DOMAIN (PHOBIUS); SIGNAL_PEPTIDE (PHOBIUS); SIGNAL_PEPTIDE_N_REGION (PHOBIUS); SIGNAL_PEPTIDE_C_REGION (PHOBIUS); SIGNAL_PEPTIDE_H_REGION (PHOBIUS); SignalP-TM (SIGNALP_GRAM_POSITIVE); SignalP-noTM (SIGNALP_EUK); SignalP-noTM (SIGNALP_GRAM_NEGATIVE)	Yes	No	No	-
1785	Mcal_1785	Contig936.Newo100p95.cap3o60p95	600	No	IV	-	NON_CYTOPLASMIC_DOMAIN (PHOBIUS); SIGNAL_PEPTIDE_C_REGION (PHOBIUS); SIGNAL_PEPTIDE (PHOBIUS); SIGNAL_PEPTIDE_H_REGION (PHOBIUS); SIGNAL_PEPTIDE_N_REGION (PHOBIUS); SignalP-noTM (SIGNALP_GRAM_NEGATIVE); SignalP-noTM (SIGNALP_EUK); SignalP-TM (SIGNALP_GRAM_POSITIVE)	Yes	No	No	-
1786	Mcal_1786	Contig938.Newo100p95.cap3o60p95	367	No	IV	-	-	No	No	No	-
1787	Mcal_1787	Contig939.Newo100p95.cap3o60p95	448	No	IV	C:GO:0005840; F:GO:0003735; P:GO:0006412	IPR000716 (SMART); IPR000716 (PFAM); IPR023621 (G3DSA:3.10.440.GENE3D); IPR000716 (G3DSA:4.10.800.GENE3D); IPR000054 (PFAM); IPR000054 (PANTHER); IPR000716 (PROSITE_PATTERNS); IPR000716 (PROSITE_PROFILES); IPR023621 (SUPERFAMILY); IPR000716 (SUPERFAMILY)	Yes	Yes	No	-
1788	Mcal_1788	Contig94.Newo100p95.cap3o60p95	1021	No	IV	-	G3DSA:2.10.80.10 (GENE3D); SIGNAL_PEPTIDE (PHOBIUS); SIGNAL_PEPTIDE_N_REGION (PHOBIUS); SIGNAL_PEPTIDE_C_REGION (PHOBIUS); NON_CYTOPLASMIC_DOMAIN (PHOBIUS); SIGNAL_PEPTIDE_H_REGION (PHOBIUS); SignalP-noTM (SIGNALP_EUK); SignalP-TM (SIGNALP_GRAM_POSITIVE)	Yes	No	No	-
1789	Mcal_1789	Contig943.Newo100p95.cap3o60p95	512	No	IV	P:GO:0006457; P:GO:0006950; F:GO:0005524; F:GO:0051082	IPR001404 (PFAM); IPR001404 (PANTHER); SSF110942 (SUPERFAMILY)	Yes	No	Yes	-
1790	Mcal_1790	Contig945.Newo100p95.cap3o60p95	1011	No	IV	C:GO:0005840; F:GO:0003735; P:GO:0006412	-	Yes	No	Yes	-
1791	Mcal_1791	Contig946.Newo100p95.cap3o60p95	616	No	IV	P:GO:0007498; P:GO:0045214; P:GO:0046716; F:GO:0005509; C:GO:0005861; P:GO:0030240; P:GO:0006874; P:GO:0048644; P:GO:0007005; P:GO:0006937; F:GO:0005523	NON_CYTOPLASMIC_DOMAIN (PHOBIUS); SIGNAL_PEPTIDE_N_REGION (PHOBIUS); SIGNAL_PEPTIDE_C_REGION (PHOBIUS); SIGNAL_PEPTIDE_H_REGION (PHOBIUS); SIGNAL_PEPTIDE (PHOBIUS)	Yes	No	No	-
1792	Mcal_1792	Contig947.Newo100p95.cap3o60p95	497	No	IV	C:GO:0005856; C:GO:0005737; F:GO:0005524	IPR004000 (PRINTS); G3DSA:3.30.420.40 (GENE3D); IPR004000 (PFAM); IPR004000 (PANTHER); PTHR11937:SF162 (PANTHER); IPR020902 (PROSITE_PATTERNS); SSF53067 (SUPERFAMILY)	Yes	Yes	Yes	-
1793	Mcal_1793	Contig95.Newo100p95.cap3o60p95	1243	No	IV	-	IPR012674 (G3DSA:2.40.128.GENE3D); IPR000566 (PFAM); PTHR10612 (PANTHER); IPR011038 (SUPERFAMILY)	Yes	No	No	-
1794	Mcal_1794	Contig954.Newo100p95.cap3o60p95	791	No	IV	-	-	Yes	No	No	-
1795	Mcal_1795	Contig963.Newo100p95.cap3o60p95	448	No	IV	-	-	No	No	No	-
1796	Mcal_1796	Contig969.Newo100p95.cap3o60p95	695	No	IV	C:GO:0005840; F:GO:0003735; P:GO:0006412	IPR022309 (PFAM); IPR001047 (TIGRFAM); IPR001047 (PANTHER); IPR018283 (PROSITE_PATTERNS)	Yes	No	Yes	-
1797	Mcal_1797	Contig97.Newo100p95.cap3o60p95	1716	No	IV	F:GO:0016779; F:GO:0003746; P:GO:0006414; P:GO:0006184; F:GO:0003924; C:GO:0005737; F:GO:0005525	NON_CYTOPLASMIC_DOMAIN (PHOBIUS); SIGNAL_PEPTIDE_H_REGION (PHOBIUS); SIGNAL_PEPTIDE_N_REGION (PHOBIUS); SIGNAL_PEPTIDE_C_REGION (PHOBIUS); SIGNAL_PEPTIDE (PHOBIUS); SignalP-noTM (SIGNALP_EUK)	Yes	Yes	Yes	-
1798	Mcal_1798	Contig973.Newo100p95.cap3o60p95	423	No	IV	F:GO:0003676; P:GO:0006376; P:GO:0048025; F:GO:0000166; P:GO:0016482; C:GO:0005654	IPR000504 (SMART); IPR012677 (G3DSA:3.30.70.GENE3D); IPR000504 (PFAM); PTHR23147 (PANTHER); IPR000504 (PROSITE_PROFILES); SSF54928 (SUPERFAMILY)	Yes	Yes	Yes	-
1799	Mcal_1799	Contig976.Newo100p95.cap3o60p95	502	No	IV	C:GO:0005840; F:GO:0003735; P:GO:0006414	Coil (COILS); IPR001813 (PFAM); PTHR21141 (PANTHER); IPR027534 (HAMAP)	Yes	No	Yes	-
1800	Mcal_1800	Contig977.Newo100p95.cap3o60p95	781	No	IV	P:GO:0045454	Coil (COILS); IPR012336 (G3DSA:3.40.30.GENE3D); IPR013766 (PFAM); PTHR21148 (PANTHER); IPR012336 (SUPERFAMILY)	Yes	No	No	-
1801	Mcal_1801	Contig978.Newo100p95.cap3o60p95	895	No	IV	C:GO:0005840; F:GO:0003735; C:GO:0005861; F:GO:0008061; C:GO:0005576; P:GO:0006412; P:GO:0006030	IPR001978 (PFAM); G3DSA:1.20.5.350 (GENE3D); SSF90250 (SUPERFAMILY)	Yes	No	No	-
1802	Mcal_1802	Contig984.Newo100p95.cap3o60p95	1096	No	IV	P:GO:0006810; C:GO:0016021	Coil (COILS); IPR009038 (PFAM); IPR015720 (PANTHER); PTHR22811:SF55 (PANTHER); CYTOPLASMIC_DOMAIN (PHOBIUS); NON_CYTOPLASMIC_DOMAIN (PHOBIUS); TRANSMEMBRANE (PHOBIUS); IPR009038 (PROSITE_PROFILES); IPR009038 (SUPERFAMILY); TMhelix (TMHMM)	Yes	Yes	Yes	-
1803	Mcal_1803	Contig988.Newo100p95.cap3o60p95	628	No	IV	C:GO:0005840; F:GO:0003735; P:GO:0006412; F:GO:0019843	IPR016180 (G3DSA:3.90.1170.GENE3D); IPR016180 (PFAM); PTHR12220:SF13 (PANTHER); IPR000114 (PANTHER); SIGNAL_PEPTIDE_N_REGION (PHOBIUS); NON_CYTOPLASMIC_DOMAIN (PHOBIUS); SIGNAL_PEPTIDE (PHOBIUS); SIGNAL_PEPTIDE_H_REGION (PHOBIUS); SIGNAL_PEPTIDE_C_REGION (PHOBIUS); PS51257 (PROSITE_PROFILES); SignalP-TM (SIGNALP_EUK); IPR016180 (SUPERFAMILY); TMhelix (TMHMM); TMhelix (TMHMM)	Yes	No	No	-
1804	Mcal_1804	Contig989.Newo100p95.cap3o60p95	652	No	IV	F:GO:0005509	PTHR23048:SF6 (PANTHER); PTHR23048 (PANTHER); CYTOPLASMIC_DOMAIN (PHOBIUS); TRANSMEMBRANE (PHOBIUS); NON_CYTOPLASMIC_DOMAIN (PHOBIUS)	Yes	No	No	-
1805	Mcal_1805	Contig990.Newo100p95.cap3o60p95	664	No	IV	F:GO:0042302	-	Yes	No	No	-
1806	Mcal_1806	Contig992.Newo100p95.cap3o60p95	585	No	IV	-	SIGNAL_PEPTIDE_H_REGION (PHOBIUS); SIGNAL_PEPTIDE_C_REGION (PHOBIUS); SIGNAL_PEPTIDE_N_REGION (PHOBIUS); NON_CYTOPLASMIC_DOMAIN (PHOBIUS); SIGNAL_PEPTIDE (PHOBIUS); SignalP-noTM (SIGNALP_EUK); SignalP-TM (SIGNALP_GRAM_POSITIVE); TMhelix (TMHMM)	Yes	No	No	-
1807	Mcal_1807	Contig995.Newo100p95.cap3o60p95	296	No	IV	-	-	Yes	No	No	-
1808	Mcal_1808	Contig998.Newo100p95.cap3o60p95	507	No	IV	-	-	Yes	No	No	-
1809	Mcal_1809	G232G8W04H0KPN_palp	188	Yes	IV	-	-	No	No	No	-
1810	Mcal_1810	G232G8W04H0M8Q_palp	364	Yes	IV	-	-	Yes	No	No	-
1811	Mcal_1811	G232G8W04H1B10_leg	334	Yes	IV	F:GO:0005509	SIGNAL_PEPTIDE_C_REGION (PHOBIUS); NON_CYTOPLASMIC_DOMAIN (PHOBIUS); SIGNAL_PEPTIDE_N_REGION (PHOBIUS); SIGNAL_PEPTIDE (PHOBIUS); SIGNAL_PEPTIDE_H_REGION (PHOBIUS); SignalP-noTM (SIGNALP_EUK)	Yes	Yes	No	-
1812	Mcal_1812	G232G8W04H1BFE_leg	331	Yes	IV	-	-	Yes	No	No	-
1813	Mcal_1813	G232G8W04H1NRZ_palp	342	Yes	IV	-	-	Yes	No	No	-
1814	Mcal_1814	G232G8W04H1PEM_leg	330	Yes	IV	-	-	Yes	No	No	-
1815	Mcal_1815	G232G8W04H3TIX_leg	198	Yes	IV	-	SignalP-TM (SIGNALP_GRAM_POSITIVE)	Yes	No	No	-
1816	Mcal_1816	G232G8W04H4QL0_palp	366	Yes	IV	C:GO:0005856; C:GO:0005737; F:GO:0005524	-	Yes	No	Yes	-
1817	Mcal_1817	G232G8W04H4UOQ_palp	175	Yes	IV	-	-	Yes	Yes	No	-
1818	Mcal_1818	G232G8W04H4VGB_palp	460	Yes	IV	-	-	No	No	No	-
1819	Mcal_1819	G232G8W04H4WVG_palp	368	Yes	IV	-	-	Yes	No	No	-
1820	Mcal_1820	G232G8W04H4YGZ_leg	355	Yes	IV	-	-	No	No	No	-
1821	Mcal_1821	G232G8W04H51RS_leg	295	Yes	IV	C:GO:0005737; P:GO:0016310; F:GO:0005524; F:GO:0004054	-	Yes	No	No	map00330
1822	Mcal_1822	G232G8W04H53E8_leg	217	Yes	IV	C:GO:0005743; P:GO:0055085; C:GO:0016021; F:GO:0005215	-	Yes	Yes	No	-
1823	Mcal_1823	G232G8W04H5DQO_palp	373	Yes	IV	-	CYTOPLASMIC_DOMAIN (PHOBIUS); NON_CYTOPLASMIC_DOMAIN (PHOBIUS); TRANSMEMBRANE (PHOBIUS); TMhelix (TMHMM)	Yes	No	No	-
1824	Mcal_1824	G232G8W04H5I75_palp	366	Yes	IV	C:GO:0005737; P:GO:0016310; F:GO:0005524; F:GO:0004054	TMhelix (TMHMM)	Yes	No	No	map00330
1825	Mcal_1825	G232G8W04H5NS1_leg	382	Yes	IV	-	SIGNAL_PEPTIDE_H_REGION (PHOBIUS); SIGNAL_PEPTIDE_N_REGION (PHOBIUS); SIGNAL_PEPTIDE_C_REGION (PHOBIUS); NON_CYTOPLASMIC_DOMAIN (PHOBIUS); SIGNAL_PEPTIDE (PHOBIUS)	Yes	No	No	-
1826	Mcal_1826	G232G8W04H5SJ6_palp	435	Yes	IV	F:GO:0005507; C:GO:0005576; F:GO:0031404; P:GO:0008152; P:GO:0006810	-	Yes	No	No	-
1827	Mcal_1827	G232G8W04H5V90_leg	415	Yes	IV	F:GO:0005507; C:GO:0005615; F:GO:0031404; F:GO:0005344; F:GO:0016491; P:GO:0015671; P:GO:0055114	-	Yes	No	No	-
1828	Mcal_1828	G232G8W04H6LFQ_leg	140	Yes	IV	-	-	No	No	No	-
1829	Mcal_1829	G232G8W04H6V8C_leg	344	Yes	IV	-	CYTOPLASMIC_DOMAIN (PHOBIUS); NON_CYTOPLASMIC_DOMAIN (PHOBIUS); TRANSMEMBRANE (PHOBIUS); TMhelix (TMHMM)	Yes	No	No	-
1830	Mcal_1830	G232G8W04H7IY7_palp	308	Yes	IV	F:GO:0005507; C:GO:0005576; F:GO:0031404; P:GO:0008152; P:GO:0006810	-	Yes	No	No	-
1831	Mcal_1831	G232G8W04H7QGR_leg	445	Yes	IV	-	-	No	No	No	-
1832	Mcal_1832	G232G8W04H85FY_leg	341	Yes	IV	-	-	Yes	No	No	-
1833	Mcal_1833	G232G8W04H9G9E_leg	368	Yes	IV	-	-	Yes	No	No	-
1834	Mcal_1834	G232G8W04H9M9Y_leg	313	Yes	IV	-	TMhelix (TMHMM)	No	No	No	-
1835	Mcal_1835	G232G8W04H9YFQ_leg	290	Yes	IV	F:GO:0003746; P:GO:0006414; P:GO:0006184; F:GO:0003924; F:GO:0005525	-	Yes	No	Yes	-
1836	Mcal_1836	G232G8W04I0ISQ_leg	348	Yes	IV	-	CYTOPLASMIC_DOMAIN (PHOBIUS); NON_CYTOPLASMIC_DOMAIN (PHOBIUS); TRANSMEMBRANE (PHOBIUS)	Yes	No	No	-
1837	Mcal_1837	G232G8W04I0SBQ_leg	448	Yes	IV	-	-	Yes	No	No	-
1838	Mcal_1838	G232G8W04I1T73_leg	188	Yes	IV	-	TRANSMEMBRANE (PHOBIUS); CYTOPLASMIC_DOMAIN (PHOBIUS); NON_CYTOPLASMIC_DOMAIN (PHOBIUS)	No	No	No	-
1839	Mcal_1839	G232G8W04I1Y4F_leg	140	Yes	IV	-	IPR004000 (PFAM); G3DSA:3.30.420.40 (GENE3D)	Yes	No	Yes	-
1840	Mcal_1840	G232G8W04I237E_palp	251	Yes	IV	-	-	Yes	No	No	-
1841	Mcal_1841	G232G8W04I2T8M_palp	370	Yes	IV	-	-	Yes	No	No	-
1842	Mcal_1842	G232G8W04I3HQ8_palp	371	Yes	IV	-	-	No	No	No	-
1843	Mcal_1843	G232G8W04I5DV7_palp	385	Yes	IV	C:GO:0005737; P:GO:0016310; F:GO:0005524; F:GO:0004054	IPR014746 (G3DSA:3.30.590.GENE3D); IPR022414 (PFAM); PTHR11547 (PANTHER); PTHR11547:SF18 (PANTHER); IPR022414 (PROSITE_PROFILES); SSF55931 (SUPERFAMILY)	Yes	No	No	map00330
1844	Mcal_1844	G232G8W04I5DWT_palp	414	Yes	IV	C:GO:0005840; F:GO:0003735; P:GO:0006412	NON_CYTOPLASMIC_DOMAIN (PHOBIUS); TRANSMEMBRANE (PHOBIUS); CYTOPLASMIC_DOMAIN (PHOBIUS); SignalP-TM (SIGNALP_GRAM_POSITIVE); TMhelix (TMHMM)	Yes	No	No	-
1845	Mcal_1845	G232G8W04I5M89_palp	234	Yes	IV	-	-	Yes	No	No	-
1846	Mcal_1846	G232G8W04I7479_palp	315	Yes	IV	-	TRANSMEMBRANE (PHOBIUS); CYTOPLASMIC_DOMAIN (PHOBIUS); NON_CYTOPLASMIC_DOMAIN (PHOBIUS); TMhelix (TMHMM)	No	No	No	-
1847	Mcal_1847	G232G8W04I7E09_palp	403	Yes	IV	F:GO:0042302	-	Yes	No	No	-
1848	Mcal_1848	G232G8W04I7Y7V_leg	395	Yes	IV	-	NON_CYTOPLASMIC_DOMAIN (PHOBIUS); TRANSMEMBRANE (PHOBIUS); CYTOPLASMIC_DOMAIN (PHOBIUS)	No	No	No	-
1849	Mcal_1849	G232G8W04I8BSJ_leg	450	Yes	IV	-	-	No	No	No	-
1850	Mcal_1850	G232G8W04I9Z8J_palp	372	Yes	IV	-	NON_CYTOPLASMIC_DOMAIN (PHOBIUS); CYTOPLASMIC_DOMAIN (PHOBIUS); TRANSMEMBRANE (PHOBIUS); TMhelix (TMHMM); TMhelix (TMHMM)	No	No	No	-
1851	Mcal_1851	G232G8W04IA9DW_palp	396	Yes	IV	-	TRANSMEMBRANE (PHOBIUS); NON_CYTOPLASMIC_DOMAIN (PHOBIUS); TRANSMEMBRANE (PHOBIUS); CYTOPLASMIC_DOMAIN (PHOBIUS); NON_CYTOPLASMIC_DOMAIN (PHOBIUS); TMhelix (TMHMM)	No	No	No	-
1852	Mcal_1852	G232G8W04IADGP_leg	210	Yes	IV	-	SignalP-noTM (SIGNALP_EUK)	Yes	No	No	-
1853	Mcal_1853	G232G8W04IAKIT_palp	402	Yes	IV	F:GO:0005509	IPR002048 (SMART); IPR011992 (PFAM); IPR011992 (G3DSA:1.10.238.GENE3D); PTHR10891 (PANTHER); PTHR10891:SF539 (PANTHER); IPR018247 (PROSITE_PATTERNS); IPR002048 (PROSITE_PROFILES); IPR002048 (PROSITE_PROFILES); SSF47473 (SUPERFAMILY)	Yes	Yes	No	-
1854	Mcal_1854	G232G8W04IB7PP_palp	382	Yes	IV	-	NON_CYTOPLASMIC_DOMAIN (PHOBIUS); TRANSMEMBRANE (PHOBIUS); CYTOPLASMIC_DOMAIN (PHOBIUS); TMhelix (TMHMM)	Yes	No	No	-
1855	Mcal_1855	G232G8W04IBABN_leg	381	Yes	IV	-	SIGNAL_PEPTIDE_N_REGION (PHOBIUS); SIGNAL_PEPTIDE (PHOBIUS); SIGNAL_PEPTIDE_H_REGION (PHOBIUS); SIGNAL_PEPTIDE_C_REGION (PHOBIUS); NON_CYTOPLASMIC_DOMAIN (PHOBIUS); SignalP-TM (SIGNALP_GRAM_POSITIVE); TMhelix (TMHMM)	Yes	No	No	-
1856	Mcal_1856	G232G8W04IBHST_leg	361	Yes	IV	-	-	Yes	No	No	-
1857	Mcal_1857	G232G8W04IBO99_palp	280	Yes	IV	-	-	No	No	No	-
1858	Mcal_1858	G232G8W04IC3QG_palp	351	Yes	IV	-	-	Yes	No	No	-
1859	Mcal_1859	G232G8W04IC97V_palp	338	Yes	IV	-	SIGNAL_PEPTIDE_C_REGION (PHOBIUS); TRANSMEMBRANE (PHOBIUS); SIGNAL_PEPTIDE_N_REGION (PHOBIUS); NON_CYTOPLASMIC_DOMAIN (PHOBIUS); CYTOPLASMIC_DOMAIN (PHOBIUS); SIGNAL_PEPTIDE (PHOBIUS); SIGNAL_PEPTIDE_H_REGION (PHOBIUS); TMhelix (TMHMM)	Yes	No	No	-
1860	Mcal_1860	G232G8W04ICXZX_leg	365	Yes	IV	-	-	No	No	No	-
1861	Mcal_1861	G232G8W04IDF50_palp	489	Yes	IV	-	-	Yes	No	No	-
1862	Mcal_1862	G232G8W04IDV7J_palp	456	Yes	IV	-	-	Yes	No	No	-
1863	Mcal_1863	G232G8W04IENQM_palp	408	Yes	IV	-	-	Yes	No	No	-
1864	Mcal_1864	G232G8W04IEYYL_palp	446	Yes	IV	-	-	Yes	No	No	-
1865	Mcal_1865	G232G8W04IGSPF_palp	372	Yes	IV	-	-	Yes	No	No	-
1866	Mcal_1866	G232G8W04IHFK0_palp	216	Yes	IV	-	-	No	No	No	-
1867	Mcal_1867	G232G8W04IHHJ8_leg	333	Yes	IV	-	CYTOPLASMIC_DOMAIN (PHOBIUS); NON_CYTOPLASMIC_DOMAIN (PHOBIUS); TRANSMEMBRANE (PHOBIUS); TMhelix (TMHMM)	Yes	No	No	-
1868	Mcal_1868	G232G8W04II2HK_leg	336	Yes	IV	-	SIGNAL_PEPTIDE (PHOBIUS); SIGNAL_PEPTIDE_C_REGION (PHOBIUS); SIGNAL_PEPTIDE_N_REGION (PHOBIUS); SIGNAL_PEPTIDE_H_REGION (PHOBIUS); NON_CYTOPLASMIC_DOMAIN (PHOBIUS); SignalP-noTM (SIGNALP_EUK); SignalP-TM (SIGNALP_GRAM_POSITIVE); SignalP-noTM (SIGNALP_GRAM_NEGATIVE); TMhelix (TMHMM)	No	No	No	-
1869	Mcal_1869	G232G8W04IIB4H_leg	314	Yes	IV	-	NON_CYTOPLASMIC_DOMAIN (PHOBIUS); CYTOPLASMIC_DOMAIN (PHOBIUS); TRANSMEMBRANE (PHOBIUS); TMhelix (TMHMM)	Yes	No	No	-
1870	Mcal_1870	G232G8W04IPAQB_palp	249	Yes	IV	-	-	Yes	No	No	-
1871	Mcal_1871	G232G8W04IPJY7_palp	428	Yes	IV	-	-	No	No	No	-
1872	Mcal_1872	G232G8W04IQ2CG_leg	336	Yes	IV	-	-	No	No	No	-
1873	Mcal_1873	G232G8W04IQAW1_leg	168	Yes	IV	C:GO:0030529	-	Yes	No	No	-
1874	Mcal_1874	G232G8W04IQYSX_leg	390	Yes	IV	-	IPR004977 (PFAM); IPR004977 (PANTHER)	Yes	No	No	-
1875	Mcal_1875	G232G8W04IR474_leg	355	Yes	IV	-	SIGNAL_PEPTIDE_N_REGION (PHOBIUS); SIGNAL_PEPTIDE_C_REGION (PHOBIUS); SIGNAL_PEPTIDE (PHOBIUS); NON_CYTOPLASMIC_DOMAIN (PHOBIUS); SIGNAL_PEPTIDE_H_REGION (PHOBIUS)	Yes	No	No	-
1876	Mcal_1876	G232G8W04IRBGW_palp	456	Yes	IV	-	CYTOPLASMIC_DOMAIN (PHOBIUS); TRANSMEMBRANE (PHOBIUS); NON_CYTOPLASMIC_DOMAIN (PHOBIUS)	No	No	No	-
1877	Mcal_1877	G232G8W04IRLKX_leg	297	Yes	IV	-	-	No	No	No	-
1878	Mcal_1878	G232G8W04IRWHT_palp	384	Yes	IV	-	-	Yes	No	No	-
1879	Mcal_1879	G232G8W04IRXCK_palp	323	Yes	IV	C:GO:0005861; P:GO:0006937	SIGNAL_PEPTIDE_C_REGION (PHOBIUS); SIGNAL_PEPTIDE (PHOBIUS); SIGNAL_PEPTIDE_N_REGION (PHOBIUS); SIGNAL_PEPTIDE_H_REGION (PHOBIUS); NON_CYTOPLASMIC_DOMAIN (PHOBIUS); TMhelix (TMHMM)	Yes	No	No	-
1880	Mcal_1880	G232G8W04IS5VG_palp	119	Yes	IV	-	-	No	No	No	-
1881	Mcal_1881	G232G8W04ISHU1_leg	437	Yes	IV	C:GO:0005615	IPR023796 (PFAM); G3DSA:2.30.39.10 (GENE3D); IPR000215 (PANTHER); IPR023795 (PROSITE_PATTERNS); IPR023796 (SUPERFAMILY)	Yes	No	No	-
1882	Mcal_1882	G232G8W04IT006_leg	355	Yes	IV	-	-	Yes	No	No	-
1883	Mcal_1883	G232G8W04ITS0A_leg	455	Yes	IV	-	-	No	No	No	-
1884	Mcal_1884	G232G8W04IU0B0_palp	458	Yes	IV	-	-	No	No	No	-
1885	Mcal_1885	G232G8W04IV7PW_leg	314	Yes	IV	-	CYTOPLASMIC_DOMAIN (PHOBIUS); NON_CYTOPLASMIC_DOMAIN (PHOBIUS); TRANSMEMBRANE (PHOBIUS); TMhelix (TMHMM)	Yes	No	No	-
1886	Mcal_1886	G232G8W04IVTXD_leg	372	Yes	IV	-	TRANSMEMBRANE (PHOBIUS); NON_CYTOPLASMIC_DOMAIN (PHOBIUS); CYTOPLASMIC_DOMAIN (PHOBIUS); TMhelix (TMHMM)	Yes	No	No	-
1887	Mcal_1887	G232G8W04IW0WD_leg	116	Yes	IV	-	-	No	No	No	-
1888	Mcal_1888	G232G8W04IW370_leg	340	Yes	IV	-	-	No	No	No	-
1889	Mcal_1889	G232G8W04IWD8K_palp	465	Yes	IV	F:GO:0032440; P:GO:0055114; F:GO:0005509	SIGNAL_PEPTIDE_N_REGION (PHOBIUS); SIGNAL_PEPTIDE_C_REGION (PHOBIUS); SIGNAL_PEPTIDE (PHOBIUS); NON_CYTOPLASMIC_DOMAIN (PHOBIUS); SIGNAL_PEPTIDE_H_REGION (PHOBIUS); SignalP-noTM (SIGNALP_EUK)	Yes	No	No	-
1890	Mcal_1890	G232G8W04IWUX6_leg	500	Yes	IV	F:GO:0005507; F:GO:0031404; P:GO:0008152	-	Yes	No	No	-
1891	Mcal_1891	G232G8W04IWWME_leg	276	Yes	IV	-	NON_CYTOPLASMIC_DOMAIN (PHOBIUS); CYTOPLASMIC_DOMAIN (PHOBIUS); TRANSMEMBRANE (PHOBIUS); TMhelix (TMHMM)	Yes	No	No	-
1892	Mcal_1892	G232G8W04IX3YM_leg	447	Yes	IV	-	NON_CYTOPLASMIC_DOMAIN (PHOBIUS); TRANSMEMBRANE (PHOBIUS); CYTOPLASMIC_DOMAIN (PHOBIUS); TMhelix (TMHMM)	No	No	No	-
1893	Mcal_1893	G232G8W04IX8Y1_leg	370	Yes	IV	F:GO:0004252; P:GO:0006508	G3DSA:2.40.10.10 (GENE3D); IPR001254 (PFAM); PTHR24258:SF96 (PANTHER); PTHR24258 (PANTHER); IPR009003 (SUPERFAMILY)	Yes	No	No	-
1894	Mcal_1894	G232G8W04IXJ5V_leg	464	Yes	IV	-	-	No	No	No	-
1895	Mcal_1895	G232G8W04IXU34_leg	148	Yes	IV	-	SignalP-TM (SIGNALP_GRAM_POSITIVE)	Yes	No	No	-
1896	Mcal_1896	G232G8W04IYCBW_palp	488	Yes	IV	C:GO:0005743; P:GO:0055085; C:GO:0016021; F:GO:0005215	-	Yes	Yes	No	-
1897	Mcal_1897	G232G8W04IYHEW_leg	346	Yes	IV	-	-	No	No	No	-
1898	Mcal_1898	G232G8W04IZ6HC_leg	436	Yes	IV	-	-	No	No	No	-
1899	Mcal_1899	G232G8W04IZP7P_leg	389	Yes	IV	C:GO:0044424; F:GO:0000166	-	Yes	Yes	Yes	-
1900	Mcal_1900	G232G8W04IZTUP_palp	452	Yes	IV	-	SIGNAL_PEPTIDE_H_REGION (PHOBIUS); SIGNAL_PEPTIDE_N_REGION (PHOBIUS); SIGNAL_PEPTIDE_C_REGION (PHOBIUS); SIGNAL_PEPTIDE (PHOBIUS); NON_CYTOPLASMIC_DOMAIN (PHOBIUS); SignalP-TM (SIGNALP_EUK); SignalP-TM (SIGNALP_GRAM_POSITIVE); TMhelix (TMHMM); TMhelix (TMHMM)	Yes	No	No	-
1901	Mcal_1901	G232G8W04J01PD_leg	291	Yes	IV	-	-	Yes	No	No	-
1902	Mcal_1902	G232G8W04JA2RW_leg	392	Yes	IV	-	-	No	No	No	-
1903	Mcal_1903	G232G8W04JAKOW_palp	378	Yes	IV	F:GO:0005215; C:GO:0016020; P:GO:0006810	-	Yes	No	Yes	-
1904	Mcal_1904	G232G8W04JALH5_palp	220	Yes	IV	-	NON_CYTOPLASMIC_DOMAIN (PHOBIUS); SIGNAL_PEPTIDE_N_REGION (PHOBIUS); SIGNAL_PEPTIDE_C_REGION (PHOBIUS); SIGNAL_PEPTIDE (PHOBIUS); SIGNAL_PEPTIDE_H_REGION (PHOBIUS); SignalP-TM (SIGNALP_GRAM_POSITIVE); SignalP-noTM (SIGNALP_EUK); SignalP-noTM (SIGNALP_GRAM_NEGATIVE)	No	No	No	-
1905	Mcal_1905	G232G8W04JB8I1_leg	459	Yes	IV	-	SIGNAL_PEPTIDE (PHOBIUS); SIGNAL_PEPTIDE_N_REGION (PHOBIUS); SIGNAL_PEPTIDE_C_REGION (PHOBIUS); NON_CYTOPLASMIC_DOMAIN (PHOBIUS); SIGNAL_PEPTIDE_H_REGION (PHOBIUS); SignalP-noTM (SIGNALP_EUK); TMhelix (TMHMM)	Yes	No	No	-
1906	Mcal_1906	G232G8W04JC9VR_leg	274	Yes	IV	-	TRANSMEMBRANE (PHOBIUS); NON_CYTOPLASMIC_DOMAIN (PHOBIUS); CYTOPLASMIC_DOMAIN (PHOBIUS); TMhelix (TMHMM)	No	No	No	-
1907	Mcal_1907	G232G8W04JCM9I_palp	395	Yes	IV	-	-	No	No	No	-
1908	Mcal_1908	G232G8W04JDGL7_palp	505	Yes	IV	C:GO:0005840; F:GO:0003735; P:GO:0006412	-	Yes	No	Yes	-
1909	Mcal_1909	G232G8W04JDJXG_leg	286	Yes	IV	-	-	No	No	No	-
1910	Mcal_1910	G232G8W04JEJN6_leg	379	Yes	IV	-	-	No	No	No	-
1911	Mcal_1911	G232G8W04JF0CH_palp	246	Yes	IV	-	TRANSMEMBRANE (PHOBIUS); NON_CYTOPLASMIC_DOMAIN (PHOBIUS); TRANSMEMBRANE (PHOBIUS); CYTOPLASMIC_DOMAIN (PHOBIUS); NON_CYTOPLASMIC_DOMAIN (PHOBIUS); TMhelix (TMHMM); TMhelix (TMHMM)	No	No	No	-
1912	Mcal_1912	G232G8W04JFVNZ_leg	304	Yes	IV	-	-	Yes	No	No	-
1913	Mcal_1913	G232G8W04JGP47_leg	214	Yes	IV	-	-	No	No	No	-
1914	Mcal_1914	G232G8W04JHNSJ_leg	349	Yes	IV	-	-	No	No	No	-
1915	Mcal_1915	G232G8W04JHPBW_leg	387	Yes	IV	-	NON_CYTOPLASMIC_DOMAIN (PHOBIUS); TRANSMEMBRANE (PHOBIUS); CYTOPLASMIC_DOMAIN (PHOBIUS); TMhelix (TMHMM)	No	No	No	-
1916	Mcal_1916	G232G8W04JI88M_leg	324	Yes	IV	-	-	No	No	No	-
1917	Mcal_1917	G232G8W04JIM6I_palp	423	Yes	IV	F:GO:0005509	CYTOPLASMIC_DOMAIN (PHOBIUS); NON_CYTOPLASMIC_DOMAIN (PHOBIUS); TRANSMEMBRANE (PHOBIUS)	Yes	No	No	-
1918	Mcal_1918	G232G8W04JINBM_palp	100	Yes	IV	-	-	Yes	No	No	-
1919	Mcal_1919	G232G8W04JKWSV_palp	452	Yes	IV	-	-	Yes	No	No	-
1920	Mcal_1920	G232G8W04JL1HD_palp	332	Yes	IV	F:GO:0016705; F:GO:0005506; P:GO:0055114; F:GO:0020037	IPR002401 (PRINTS); IPR001128 (PFAM); IPR001128 (G3DSA:1.10.630.GENE3D); PTHR24300 (PANTHER); SignalP-noTM (SIGNALP_EUK); IPR001128 (SUPERFAMILY)	Yes	No	No	-
1921	Mcal_1921	G232G8W04JNHA7_palp	205	Yes	IV	-	-	No	No	No	-
1922	Mcal_1922	G232G8W04JOLI9_leg	411	Yes	IV	C:GO:0005856; C:GO:0005737; F:GO:0005524	G3DSA:3.30.420.40 (GENE3D); SSF53067 (SUPERFAMILY)	Yes	Yes	Yes	-
1923	Mcal_1923	G232G8W04JPHOC_palp	437	Yes	IV	-	-	No	No	No	-
1924	Mcal_1924	G232G8W04JQ2QJ_leg	321	Yes	IV	F:GO:0005507; C:GO:0005615; F:GO:0031404; F:GO:0005344; F:GO:0016491; P:GO:0015671; P:GO:0055114	TRANSMEMBRANE (PHOBIUS); CYTOPLASMIC_DOMAIN (PHOBIUS); NON_CYTOPLASMIC_DOMAIN (PHOBIUS); TMhelix (TMHMM)	Yes	No	No	-
1925	Mcal_1925	G232G8W04JRE39_leg	335	Yes	IV	-	CYTOPLASMIC_DOMAIN (PHOBIUS); TRANSMEMBRANE (PHOBIUS); NON_CYTOPLASMIC_DOMAIN (PHOBIUS); TMhelix (TMHMM)	Yes	No	No	-
1926	Mcal_1926	G232G8W04JRWN0_palp	141	Yes	IV	-	TRANSMEMBRANE (PHOBIUS); CYTOPLASMIC_DOMAIN (PHOBIUS); NON_CYTOPLASMIC_DOMAIN (PHOBIUS); TMhelix (TMHMM)	Yes	No	No	-
1927	Mcal_1927	G232G8W04JT5IZ_palp	428	Yes	IV	-	CYTOPLASMIC_DOMAIN (PHOBIUS); TRANSMEMBRANE (PHOBIUS); NON_CYTOPLASMIC_DOMAIN (PHOBIUS)	Yes	No	Yes	-
1928	Mcal_1928	G232G8W04JUPHP_leg	446	Yes	IV	-	SignalP-TM (SIGNALP_GRAM_POSITIVE)	Yes	No	No	-
1929	Mcal_1929	G232G8W04JUT1R_leg	441	Yes	IV	-	-	No	No	No	-
1930	Mcal_1930	G232G8W04JV2M8_palp	359	Yes	IV	C:GO:0005856; C:GO:0005737; F:GO:0005524	IPR004000 (PRINTS); G3DSA:3.30.420.40 (GENE3D); IPR004000 (PFAM); IPR004000 (PANTHER); PTHR11937:SF162 (PANTHER); IPR020902 (PROSITE_PATTERNS); SSF53067 (SUPERFAMILY)	Yes	Yes	Yes	-
1931	Mcal_1931	G232G8W04JVFVZ_palp	351	Yes	IV	-	-	No	No	No	-
1932	Mcal_1932	G232G8W04JW7ZZ_palp	408	Yes	IV	-	-	No	No	No	-
1933	Mcal_1933	G232G8W04JW87X_palp	334	Yes	IV	F:GO:0030414; F:GO:0004869; C:GO:0005576; P:GO:0010466	SIGNAL_PEPTIDE (PHOBIUS); SIGNAL_PEPTIDE_N_REGION (PHOBIUS); SIGNAL_PEPTIDE_C_REGION (PHOBIUS); NON_CYTOPLASMIC_DOMAIN (PHOBIUS); SIGNAL_PEPTIDE_H_REGION (PHOBIUS); SignalP-noTM (SIGNALP_EUK); SignalP-TM (SIGNALP_GRAM_POSITIVE)	Yes	No	No	-
1934	Mcal_1934	G232G8W04JW95G_palp	403	Yes	IV	-	CYTOPLASMIC_DOMAIN (PHOBIUS); TRANSMEMBRANE (PHOBIUS); NON_CYTOPLASMIC_DOMAIN (PHOBIUS); TMhelix (TMHMM)	Yes	No	Yes	-
1935	Mcal_1935	G232G8W04JWA52_palp	373	Yes	IV	-	-	Yes	No	No	-
1936	Mcal_1936	G232G8W04JWU96_palp	465	Yes	IV	-	-	Yes	No	No	-
1937	Mcal_1937	G232G8W04JWXR1_palp	446	Yes	IV	-	SIGNAL_PEPTIDE_N_REGION (PHOBIUS); SIGNAL_PEPTIDE (PHOBIUS); SIGNAL_PEPTIDE_C_REGION (PHOBIUS); SIGNAL_PEPTIDE_H_REGION (PHOBIUS); NON_CYTOPLASMIC_DOMAIN (PHOBIUS); SignalP-noTM (SIGNALP_EUK); SignalP-TM (SIGNALP_GRAM_POSITIVE); SignalP-noTM (SIGNALP_GRAM_NEGATIVE)	Yes	No	No	-
1938	Mcal_1938	contig00021	696	No	IV	F:GO:0005507; C:GO:0005615; F:GO:0031404; F:GO:0005344; F:GO:0016491; P:GO:0015671; P:GO:0055114	IPR013788 (PRINTS); IPR000896 (PFAM); IPR008922 (G3DSA:1.10.1280.GENE3D); IPR005204 (PFAM); IPR005204 (G3DSA:1.20.1370.GENE3D); PTHR11511:SF4 (PANTHER); IPR013788 (PANTHER); IPR013788 (PROSITE_PATTERNS); IPR005204 (SUPERFAMILY); IPR008922 (SUPERFAMILY)	Yes	No	No	-
1939	Mcal_1939	contig00037	562	No	IV	-	NON_CYTOPLASMIC_DOMAIN (PHOBIUS); TRANSMEMBRANE (PHOBIUS); CYTOPLASMIC_DOMAIN (PHOBIUS); TMhelix (TMHMM)	Yes	No	No	-
1940	Mcal_1940	contig00063	729	No	IV	F:GO:0004252; P:GO:0006508	G3DSA:2.40.10.10 (GENE3D); IPR001254 (PFAM); PTHR24268 (PANTHER); PTHR24268:SF95 (PANTHER); IPR001254 (PROSITE_PROFILES); IPR009003 (SUPERFAMILY)	Yes	No	No	-
1941	Mcal_1941	contig00069	874	No	IV	F:GO:0005507; C:GO:0005615; F:GO:0031404; F:GO:0005344; F:GO:0016491; P:GO:0015671; P:GO:0055114	IPR005203 (PFAM); IPR005203 (G3DSA:2.60.40.GENE3D); IPR013788 (PANTHER); PTHR11511:SF24 (PANTHER); IPR014756 (SUPERFAMILY)	Yes	No	No	-
1942	Mcal_1942	contig00085	756	No	IV	-	-	No	No	No	-
1943	Mcal_1943	contig00135	676	No	IV	-	SIGNAL_PEPTIDE_N_REGION (PHOBIUS); SIGNAL_PEPTIDE_H_REGION (PHOBIUS); NON_CYTOPLASMIC_DOMAIN (PHOBIUS); SIGNAL_PEPTIDE (PHOBIUS); SIGNAL_PEPTIDE_C_REGION (PHOBIUS)	Yes	No	No	-
1944	Mcal_1944	contig00187	569	No	IV	-	SIGNAL_PEPTIDE_N_REGION (PHOBIUS); SIGNAL_PEPTIDE (PHOBIUS); SIGNAL_PEPTIDE_C_REGION (PHOBIUS); NON_CYTOPLASMIC_DOMAIN (PHOBIUS); SIGNAL_PEPTIDE_H_REGION (PHOBIUS); SignalP-noTM (SIGNALP_GRAM_NEGATIVE); SignalP-TM (SIGNALP_GRAM_POSITIVE); SignalP-noTM (SIGNALP_EUK)	No	No	No	-
1945	Mcal_1945	contig00256	501	No	IV	F:GO:0016301; P:GO:0016310; F:GO:0005509	IPR002048 (SMART); IPR011992 (PFAM); IPR011992 (G3DSA:1.10.238.GENE3D); IPR002048 (PFAM); PTHR10891:SF222 (PANTHER); PTHR10891 (PANTHER); IPR018247 (PROSITE_PATTERNS); IPR018247 (PROSITE_PATTERNS); IPR018247 (PROSITE_PATTERNS); IPR002048 (PROSITE_PROFILES); IPR002048 (PROSITE_PROFILES); IPR002048 (PROSITE_PROFILES); SSF47473 (SUPERFAMILY)	Yes	Yes	No	-
1946	Mcal_1946	isotig00095	1394	No	IV	F:GO:0042302	IPR000618 (PRINTS); IPR000618 (PFAM); PTHR10380 (PANTHER); IPR000618 (PROSITE_PATTERNS); SIGNAL_PEPTIDE_C_REGION (PHOBIUS); SIGNAL_PEPTIDE_N_REGION (PHOBIUS); NON_CYTOPLASMIC_DOMAIN (PHOBIUS); SIGNAL_PEPTIDE (PHOBIUS); SIGNAL_PEPTIDE_H_REGION (PHOBIUS); IPR000618 (PROSITE_PROFILES); SignalP-noTM (SIGNALP_EUK); SignalP-noTM (SIGNALP_GRAM_NEGATIVE)	Yes	No	No	-
1947	Mcal_1947	isotig00099	1132	No	IV	F:GO:0016491; F:GO:0000166	-	Yes	No	Yes	-
1948	Mcal_1948	isotig00159	1633	No	IV	P:GO:0006165; F:GO:0004550; P:GO:0006228; F:GO:0005524; P:GO:0006183; P:GO:0006241	NON_CYTOPLASMIC_DOMAIN (PHOBIUS); TRANSMEMBRANE (PHOBIUS); CYTOPLASMIC_DOMAIN (PHOBIUS); TRANSMEMBRANE (PHOBIUS); NON_CYTOPLASMIC_DOMAIN (PHOBIUS); PS51257 (PROSITE_PROFILES); TMhelix (TMHMM); TMhelix (TMHMM)	Yes	Yes	Yes	map00230 map00240
1949	Mcal_1949	isotig00180	955	No	IV	F:GO:0005507; C:GO:0005615; F:GO:0031404; F:GO:0005344; F:GO:0016491; P:GO:0015671; P:GO:0055114	IPR005203 (PFAM); IPR000896 (PFAM); IPR008922 (G3DSA:1.10.1280.GENE3D); IPR005203 (G3DSA:2.60.40.GENE3D); IPR013788 (PANTHER); PTHR11511:SF24 (PANTHER); IPR013788 (PROSITE_PATTERNS); IPR002227 (PROSITE_PATTERNS); IPR008922 (SUPERFAMILY); IPR014756 (SUPERFAMILY)	Yes	No	No	-
1950	Mcal_1950	isotig00224	2153	No	IV	C:GO:0005856; C:GO:0005737; F:GO:0005524	IPR004000 (PRINTS); IPR004000 (SMART); IPR004000 (PFAM); G3DSA:3.30.420.40 (GENE3D); G3DSA:3.90.640.10 (GENE3D); G3DSA:3.30.420.40 (GENE3D); IPR004000 (PANTHER); PTHR11937:SF187 (PANTHER); IPR020902 (PROSITE_PATTERNS); IPR004001 (PROSITE_PATTERNS); IPR004001 (PROSITE_PATTERNS); SSF53067 (SUPERFAMILY); SSF53067 (SUPERFAMILY)	Yes	Yes	Yes	-
1951	Mcal_1951	isotig00230	869	No	IV	-	TMhelix (TMHMM)	No	No	No	-
1952	Mcal_1952	isotig00232	874	No	IV	C:GO:0005840; F:GO:0003735; P:GO:0006412; F:GO:0019843	NON_CYTOPLASMIC_DOMAIN (PHOBIUS); SIGNAL_PEPTIDE_C_REGION (PHOBIUS); SIGNAL_PEPTIDE_N_REGION (PHOBIUS); SIGNAL_PEPTIDE (PHOBIUS); SIGNAL_PEPTIDE_H_REGION (PHOBIUS); SignalP-TM (SIGNALP_EUK); TMhelix (TMHMM)	Yes	No	No	-
1953	Mcal_1953	isotig00255	1353	No	IV	P:GO:0055085; C:GO:0005743; F:GO:0005215	IPR002113 (PRINTS); IPR002067 (PRINTS); IPR023395 (G3DSA:1.50.40.GENE3D); IPR018108 (PFAM); PTHR24089 (PANTHER); PTHR24089:SF169 (PANTHER); TRANSMEMBRANE (PHOBIUS); NON_CYTOPLASMIC_DOMAIN (PHOBIUS); TRANSMEMBRANE (PHOBIUS); CYTOPLASMIC_DOMAIN (PHOBIUS); CYTOPLASMIC_DOMAIN (PHOBIUS); IPR018108 (PROSITE_PROFILES); IPR018108 (PROSITE_PROFILES); IPR018108 (PROSITE_PROFILES); IPR023395 (SUPERFAMILY); …	Yes	Yes	Yes	-
1954	Mcal_1954	isotig00258	1074	No	IV	-	SIGNAL_PEPTIDE_N_REGION (PHOBIUS); SIGNAL_PEPTIDE_C_REGION (PHOBIUS); SIGNAL_PEPTIDE_H_REGION (PHOBIUS); NON_CYTOPLASMIC_DOMAIN (PHOBIUS); SIGNAL_PEPTIDE (PHOBIUS); SignalP-TM (SIGNALP_GRAM_POSITIVE); SignalP-noTM (SIGNALP_EUK); SignalP-noTM (SIGNALP_GRAM_NEGATIVE)	Yes	No	No	-
1955	Mcal_1955	isotig00274	1313	No	IV	F:GO:0003743; P:GO:0006413; C:GO:0005829; C:GO:0005730; C:GO:0005852; F:GO:0005515	SIGNAL_PEPTIDE_C_REGION (PHOBIUS); SIGNAL_PEPTIDE_N_REGION (PHOBIUS); NON_CYTOPLASMIC_DOMAIN (PHOBIUS); SIGNAL_PEPTIDE (PHOBIUS); SIGNAL_PEPTIDE_H_REGION (PHOBIUS); TMhelix (TMHMM)	Yes	Yes	No	-
1956	Mcal_1956	isotig00277	1117	No	IV	F:GO:0003994; P:GO:0006099; F:GO:0051539	IPR015928 (G3DSA:3.20.19.GENE3D); IPR000573 (PFAM); IPR015937 (PANTHER); PTHR11670:SF30 (PANTHER); IPR015928 (SUPERFAMILY)	Yes	Yes	No	map00720 map00020 map00630
1957	Mcal_1957	isotig00285	1061	No	IV	F:GO:0042302	-	Yes	No	No	-
1958	Mcal_1958	isotig00302	1237	No	IV	F:GO:0003676; F:GO:0000166	IPR000504 (SMART); IPR000504 (PFAM); IPR012677 (G3DSA:3.30.70.GENE3D); PTHR10548 (PANTHER); IPR000504 (PROSITE_PROFILES); SSF54928 (SUPERFAMILY)	Yes	Yes	Yes	-
1959	Mcal_1959	isotig00308	824	No	IV	C:GO:0005576	G3DSA:2.10.80.10 (GENE3D); SIGNAL_PEPTIDE (PHOBIUS); NON_CYTOPLASMIC_DOMAIN (PHOBIUS); SIGNAL_PEPTIDE_N_REGION (PHOBIUS); SIGNAL_PEPTIDE_C_REGION (PHOBIUS); SIGNAL_PEPTIDE_H_REGION (PHOBIUS); SignalP-noTM (SIGNALP_EUK); SignalP-TM (SIGNALP_GRAM_POSITIVE)	Yes	No	No	-
1960	Mcal_1960	isotig00309	706	No	IV	C:GO:0005576	G3DSA:2.10.80.10 (GENE3D); SIGNAL_PEPTIDE (PHOBIUS); NON_CYTOPLASMIC_DOMAIN (PHOBIUS); SIGNAL_PEPTIDE_N_REGION (PHOBIUS); SIGNAL_PEPTIDE_C_REGION (PHOBIUS); SIGNAL_PEPTIDE_H_REGION (PHOBIUS); SignalP-noTM (SIGNALP_EUK); SignalP-TM (SIGNALP_GRAM_POSITIVE)	Yes	No	No	-
1961	Mcal_1961	isotig00317	708	No	IV	P:GO:0008152; F:GO:0016491	IPR002347 (PRINTS); IPR002198 (PRINTS); IPR016040 (G3DSA:3.40.50.GENE3D); IPR002198 (PFAM); PTHR24322 (PANTHER); PTHR24322:SF310 (PANTHER); SIGNAL_PEPTIDE_C_REGION (PHOBIUS); SIGNAL_PEPTIDE_H_REGION (PHOBIUS); SIGNAL_PEPTIDE (PHOBIUS); NON_CYTOPLASMIC_DOMAIN (PHOBIUS); SIGNAL_PEPTIDE_N_REGION (PHOBIUS); SSF51735 (SUPERFAMILY)	Yes	Yes	No	-
1962	Mcal_1962	isotig00330	1482	No	IV	F:GO:0016779; F:GO:0003746; P:GO:0006414; P:GO:0006184; F:GO:0003924; C:GO:0005737; F:GO:0005525	-	Yes	Yes	Yes	-
1963	Mcal_1963	isotig00339	1135	No	IV	P:GO:0071353; P:GO:0051258; C:GO:0005881; P:GO:0006184; P:GO:0007017; F:GO:0003924; F:GO:0005200; F:GO:0005525; F:GO:0042302	IPR000618 (PRINTS); IPR000618 (PFAM); PTHR10380:SF120 (PANTHER); PTHR10380 (PANTHER); IPR000618 (PROSITE_PATTERNS); SIGNAL_PEPTIDE_C_REGION (PHOBIUS); TRANSMEMBRANE (PHOBIUS); NON_CYTOPLASMIC_DOMAIN (PHOBIUS); CYTOPLASMIC_DOMAIN (PHOBIUS); SIGNAL_PEPTIDE_N_REGION (PHOBIUS); SIGNAL_PEPTIDE (PHOBIUS); SIGNAL_PEPTIDE_H_REGION (PHOBIUS); IPR000618 (PROSITE_PROFILES); TMhelix (TMHMM); TMhelix (TMHMM);…	Yes	Yes	Yes	-
1964	Mcal_1964	isotig00343	810	No	IV	C:GO:0005737	IPR018105 (PRINTS); IPR018105 (PFAM); IPR011323 (G3DSA:2.170.150.GENE3D); IPR018105 (PANTHER); IPR018103 (PROSITE_PATTERNS); IPR011057 (SUPERFAMILY)	Yes	No	Yes	-
1965	Mcal_1965	isotig00348	1236	No	IV	F:GO:0008061; P:GO:0006030; C:GO:0005576	-	Yes	No	No	-
1966	Mcal_1966	isotig00350	1002	No	IV	P:GO:0006810; C:GO:0005622; F:GO:0005215; F:GO:0016787	IPR011074 (SMART); IPR001251 (G3DSA:3.40.525.GENE3D); IPR011074 (PFAM); PTHR10174 (PANTHER); PTHR10174:SF110 (PANTHER); IPR011074 (SUPERFAMILY)	Yes	No	No	-
1967	Mcal_1967	isotig00355	442	No	IV	C:GO:0005840; P:GO:0042254	IPR001921 (PRINTS); IPR029064 (G3DSA:3.30.1330.GENE3D); PTHR23105:SF34 (PANTHER); PTHR23105 (PANTHER)	Yes	No	No	-
1968	Mcal_1968	isotig00356	963	No	IV	C:GO:0005840; F:GO:0003735; P:GO:0042254; F:GO:0003906; P:GO:0006414	SIGNAL_PEPTIDE_H_REGION (PHOBIUS); SIGNAL_PEPTIDE_N_REGION (PHOBIUS); SIGNAL_PEPTIDE (PHOBIUS); SIGNAL_PEPTIDE_C_REGION (PHOBIUS); NON_CYTOPLASMIC_DOMAIN (PHOBIUS); TMhelix (TMHMM)	Yes	No	Yes	-
1969	Mcal_1969	isotig00359	713	No	IV	-	SIGNAL_PEPTIDE_C_REGION (PHOBIUS); NON_CYTOPLASMIC_DOMAIN (PHOBIUS); SIGNAL_PEPTIDE_N_REGION (PHOBIUS); SIGNAL_PEPTIDE (PHOBIUS); SIGNAL_PEPTIDE_H_REGION (PHOBIUS); SignalP-noTM (SIGNALP_EUK); SignalP-TM (SIGNALP_GRAM_POSITIVE); SignalP-noTM (SIGNALP_GRAM_NEGATIVE)	Yes	No	Yes	-
1970	Mcal_1970	isotig00363	479	No	IV	-	CYTOPLASMIC_DOMAIN (PHOBIUS); TRANSMEMBRANE (PHOBIUS); NON_CYTOPLASMIC_DOMAIN (PHOBIUS); TMhelix (TMHMM)	No	No	No	-
1971	Mcal_1971	isotig00376	801	No	IV	C:GO:0005840; F:GO:0003735; P:GO:0006412	CYTOPLASMIC_DOMAIN (PHOBIUS); TRANSMEMBRANE (PHOBIUS); NON_CYTOPLASMIC_DOMAIN (PHOBIUS); TMhelix (TMHMM)	Yes	Yes	Yes	-
1972	Mcal_1972	isotig00386	368	No	IV	F:GO:0003735; C:GO:0005840; P:GO:0006412; F:GO:0000166	IPR013025 (PFAM); IPR012677 (G3DSA:3.30.70.GENE3D); PTHR11620 (PANTHER); IPR012678 (SUPERFAMILY)	Yes	No	No	-
1973	Mcal_1973	isotig00387	321	No	IV	C:GO:0005840; F:GO:0003735; P:GO:0051726; P:GO:0006412; F:GO:0000166	IPR013025 (PFAM); IPR012677 (G3DSA:3.30.70.GENE3D); PTHR11620 (PANTHER); IPR001014 (PROSITE_PATTERNS); IPR013025 (HAMAP); IPR012678 (SUPERFAMILY)	Yes	No	No	-
1974	Mcal_1974	isotig00396	900	No	IV	F:GO:0016747	PTHR11161 (PANTHER); PTHR11161:SF0 (PANTHER); TRANSMEMBRANE (PHOBIUS); CYTOPLASMIC_DOMAIN (PHOBIUS); TRANSMEMBRANE (PHOBIUS); NON_CYTOPLASMIC_DOMAIN (PHOBIUS); TRANSMEMBRANE (PHOBIUS); NON_CYTOPLASMIC_DOMAIN (PHOBIUS); CYTOPLASMIC_DOMAIN (PHOBIUS); TRANSMEMBRANE (PHOBIUS); TRANSMEMBRANE (PHOBIUS); NON_CYTOPLASMIC_DOMAIN (PHOBIUS); CYTOPLASMIC_DOMAIN (PHOBIUS); TMhelix (TMHMM); TMhelix (TMHMM); TM…	Yes	No	No	-
1975	Mcal_1975	isotig00413	1120	No	IV	F:GO:0020037; F:GO:0005506; F:GO:0016705; F:GO:0009055; P:GO:0055114; F:GO:0070330; F:GO:0016491; F:GO:0046872; F:GO:0004497	CYTOPLASMIC_DOMAIN (PHOBIUS); TRANSMEMBRANE (PHOBIUS); NON_CYTOPLASMIC_DOMAIN (PHOBIUS); TMhelix (TMHMM)	Yes	No	No	map00591 map00590 map00982 map00980 map00232 map00627 map00380 map00071 map00830 map00140
1976	Mcal_1976	isotig00424	1845	No	IV	F:GO:0008061; P:GO:0006030; C:GO:0005576	-	Yes	No	No	-
1977	Mcal_1977	isotig00437	1076	No	IV	F:GO:0005507; C:GO:0005615; F:GO:0031404; F:GO:0005344; F:GO:0016491; P:GO:0015671; P:GO:0055114	IPR013788 (PRINTS); IPR005204 (G3DSA:1.20.1370.GENE3D); IPR008922 (G3DSA:1.10.1280.GENE3D); IPR000896 (PFAM); IPR005204 (PFAM); IPR013788 (PANTHER); PTHR11511:SF4 (PANTHER); IPR013788 (PROSITE_PATTERNS); IPR008922 (SUPERFAMILY); IPR005204 (SUPERFAMILY)	Yes	No	No	-
1978	Mcal_1978	isotig00438	1054	No	IV	P:GO:0006470; F:GO:0004725	IPR000242 (PRINTS); IPR003595 (SMART); IPR000242 (PFAM); IPR029021 (G3DSA:3.90.190.GENE3D); PTHR19134 (PANTHER); IPR016130 (PROSITE_PATTERNS); IPR000242 (PROSITE_PROFILES); IPR000387 (PROSITE_PROFILES); IPR029021 (SUPERFAMILY)	Yes	Yes	No	-
1979	Mcal_1979	isotig00441	900	No	IV	-	SIGNAL_PEPTIDE_H_REGION (PHOBIUS); NON_CYTOPLASMIC_DOMAIN (PHOBIUS); SIGNAL_PEPTIDE_N_REGION (PHOBIUS); SIGNAL_PEPTIDE (PHOBIUS); SIGNAL_PEPTIDE_C_REGION (PHOBIUS)	Yes	No	No	-
1980	Mcal_1980	isotig00444	1354	No	IV	C:GO:0005840; F:GO:0008097; F:GO:0003735; P:GO:0006412	Coil (COILS); IPR005485 (PRINTS); G3DSA:3.30.420.100 (GENE3D); IPR005484 (PFAM); IPR005485 (PANTHER); SSF53137 (SUPERFAMILY)	Yes	No	No	-
1981	Mcal_1981	isotig00448	991	No	IV	P:GO:0006508; F:GO:0004252	IPR001314 (PRINTS); IPR001254 (SMART); G3DSA:2.40.10.10 (GENE3D); IPR001254 (PFAM); G3DSA:2.40.10.10 (GENE3D); PTHR24268:SF81 (PANTHER); PTHR24268 (PANTHER); IPR018114 (PROSITE_PATTERNS); IPR018114 (PROSITE_PATTERNS); IPR001254 (PROSITE_PROFILES); IPR009003 (SUPERFAMILY)	Yes	No	No	-
1982	Mcal_1982	isotig00450	935	No	IV	-	-	Yes	No	No	-
1983	Mcal_1983	isotig00454	1017	No	IV	-	-	Yes	Yes	Yes	-
1984	Mcal_1984	isotig00456	1065	No	IV	F:GO:0005507; C:GO:0005615; F:GO:0031404; F:GO:0005344; F:GO:0016491; P:GO:0015671; P:GO:0055114	IPR008922 (G3DSA:1.10.1280.GENE3D); IPR005203 (PFAM); IPR000896 (PFAM); IPR005203 (G3DSA:2.60.40.GENE3D); PTHR11511:SF4 (PANTHER); IPR013788 (PANTHER); IPR013788 (PROSITE_PATTERNS); IPR002227 (PROSITE_PATTERNS); IPR014756 (SUPERFAMILY); IPR008922 (SUPERFAMILY)	Yes	No	No	-
1985	Mcal_1985	isotig00463	783	No	IV	P:GO:0006414; F:GO:0003746; C:GO:0005853	Coil (COILS); IPR018940 (PFAM); IPR014717 (G3DSA:3.30.70.GENE3D); IPR014038 (PFAM); PTHR11595:SF20 (PANTHER); PTHR11595 (PANTHER); IPR001326 (PROSITE_PATTERNS); IPR014038 (SUPERFAMILY)	Yes	Yes	Yes	-
1986	Mcal_1986	isotig00466	931	No	IV	F:GO:0003743; P:GO:0006413; F:GO:0003746; P:GO:0006452; P:GO:0008612; P:GO:0045905; F:GO:0043022; P:GO:0045901	IPR000896 (PFAM); IPR008922 (G3DSA:1.10.1280.GENE3D); NON_CYTOPLASMIC_DOMAIN (PHOBIUS); CYTOPLASMIC_DOMAIN (PHOBIUS); TRANSMEMBRANE (PHOBIUS); IPR008922 (SUPERFAMILY); TMhelix (TMHMM)	Yes	No	Yes	-
1987	Mcal_1987	isotig00467	675	No	IV	F:GO:0003743; P:GO:0006413; F:GO:0003746; P:GO:0006452; P:GO:0008612; P:GO:0045905; F:GO:0043022; P:GO:0045901	IPR000896 (PFAM); IPR008922 (G3DSA:1.10.1280.GENE3D); NON_CYTOPLASMIC_DOMAIN (PHOBIUS); CYTOPLASMIC_DOMAIN (PHOBIUS); TRANSMEMBRANE (PHOBIUS); IPR008922 (SUPERFAMILY); TMhelix (TMHMM)	Yes	No	Yes	-
1988	Mcal_1988	isotig00474	895	No	IV	-	SIGNAL_PEPTIDE_C_REGION (PHOBIUS); NON_CYTOPLASMIC_DOMAIN (PHOBIUS); SIGNAL_PEPTIDE (PHOBIUS); SIGNAL_PEPTIDE_H_REGION (PHOBIUS); SIGNAL_PEPTIDE_N_REGION (PHOBIUS); SignalP-noTM (SIGNALP_EUK); SignalP-TM (SIGNALP_GRAM_POSITIVE)	Yes	No	No	-
1989	Mcal_1989	isotig00475	655	No	IV	-	-	Yes	No	No	-
1990	Mcal_1990	isotig00476	1107	No	IV	C:GO:0005739; C:GO:0016020	CYTOPLASMIC_DOMAIN (PHOBIUS); TRANSMEMBRANE (PHOBIUS); NON_CYTOPLASMIC_DOMAIN (PHOBIUS)	Yes	No	No	-
1991	Mcal_1991	isotig00477	431	No	IV	-	TRANSMEMBRANE (PHOBIUS); TRANSMEMBRANE (PHOBIUS); CYTOPLASMIC_DOMAIN (PHOBIUS); NON_CYTOPLASMIC_DOMAIN (PHOBIUS); NON_CYTOPLASMIC_DOMAIN (PHOBIUS); TMhelix (TMHMM); TMhelix (TMHMM)	Yes	No	No	-
1992	Mcal_1992	isotig00483	720	No	IV	F:GO:0042302	IPR000618 (PFAM); PTHR10380:SF120 (PANTHER); PTHR10380 (PANTHER); IPR000618 (PROSITE_PATTERNS); TRANSMEMBRANE (PHOBIUS); CYTOPLASMIC_DOMAIN (PHOBIUS); NON_CYTOPLASMIC_DOMAIN (PHOBIUS); IPR000618 (PROSITE_PROFILES); TMhelix (TMHMM)	Yes	No	No	-
1993	Mcal_1993	isotig00484	802	No	IV	F:GO:0008745; F:GO:0008270; P:GO:0009253	IPR006619 (SMART); IPR002502 (SMART); IPR002502 (G3DSA:3.40.80.GENE3D); IPR002502 (PFAM); IPR015510 (PANTHER); NON_CYTOPLASMIC_DOMAIN (PHOBIUS); SIGNAL_PEPTIDE (PHOBIUS); SIGNAL_PEPTIDE_N_REGION (PHOBIUS); SIGNAL_PEPTIDE_C_REGION (PHOBIUS); SIGNAL_PEPTIDE_H_REGION (PHOBIUS); SignalP-noTM (SIGNALP_EUK); IPR002502 (SUPERFAMILY)	Yes	No	No	-
1994	Mcal_1994	isotig00486	777	No	IV	F:GO:0030414; F:GO:0004869; C:GO:0005576; P:GO:0010466	IPR000716 (SMART); IPR000716 (G3DSA:4.10.800.GENE3D); IPR000716 (PFAM); IPR000716 (PROSITE_PATTERNS); SIGNAL_PEPTIDE_H_REGION (PHOBIUS); SIGNAL_PEPTIDE_N_REGION (PHOBIUS); SIGNAL_PEPTIDE_C_REGION (PHOBIUS); SIGNAL_PEPTIDE (PHOBIUS); NON_CYTOPLASMIC_DOMAIN (PHOBIUS); IPR000716 (PROSITE_PROFILES); IPR000716 (PROSITE_PROFILES); SignalP-TM (SIGNALP_GRAM_POSITIVE); SignalP-noTM (SIGNALP_EUK); IPR00071…	Yes	No	No	-
1995	Mcal_1995	isotig00490	795	No	IV	-	SIGNAL_PEPTIDE_N_REGION (PHOBIUS); SIGNAL_PEPTIDE_C_REGION (PHOBIUS); SIGNAL_PEPTIDE (PHOBIUS); SIGNAL_PEPTIDE_H_REGION (PHOBIUS); NON_CYTOPLASMIC_DOMAIN (PHOBIUS); SignalP-noTM (SIGNALP_EUK); SignalP-TM (SIGNALP_GRAM_POSITIVE)	Yes	No	No	-
1996	Mcal_1996	isotig00494	834	No	IV	F:GO:0008168; P:GO:0008152; P:GO:0032259; F:GO:0003674; F:GO:0016740; P:GO:0008150; C:GO:0005575; C:GO:0005789; C:GO:0005811	CYTOPLASMIC_DOMAIN (PHOBIUS); TRANSMEMBRANE (PHOBIUS); TRANSMEMBRANE (PHOBIUS); CYTOPLASMIC_DOMAIN (PHOBIUS); NON_CYTOPLASMIC_DOMAIN (PHOBIUS); TMhelix (TMHMM)	Yes	No	Yes	-
1997	Mcal_1997	isotig00498	843	No	IV	C:GO:0016021	IPR002076 (PFAM); IPR002076 (PANTHER); NON_CYTOPLASMIC_DOMAIN (PHOBIUS); TRANSMEMBRANE (PHOBIUS); CYTOPLASMIC_DOMAIN (PHOBIUS); TRANSMEMBRANE (PHOBIUS); NON_CYTOPLASMIC_DOMAIN (PHOBIUS); TMhelix (TMHMM); TMhelix (TMHMM); TMhelix (TMHMM)	Yes	No	No	-
1998	Mcal_1998	isotig00505	456	No	IV	F:GO:0003676; F:GO:0008270; F:GO:0000166	IPR000504 (SMART); IPR001878 (SMART); IPR001878 (PFAM); IPR001878 (G3DSA:4.10.60.GENE3D); IPR012677 (G3DSA:3.30.70.GENE3D); IPR000504 (PFAM); PTHR24012:SF270 (PANTHER); PTHR24012 (PANTHER); IPR001878 (PROSITE_PROFILES); IPR000504 (PROSITE_PROFILES); SSF54928 (SUPERFAMILY)	Yes	Yes	Yes	-
[truncated: 4,700 more rows]

## Sheet: Column Description
Table S3. Column Description			Summary of the functional annotation of transcripts
ID	Sequence_ID	Contig_ID	Length (A)	Singleton (B)	Expression Location (C)	GO_annotation (D)	InterPro_Domain (E)	Blast_Hit (F)	HK_hit (G)	CEG_hit (H)	KEGG (I)
	(A), Length		Sequence length (in nucleotides)
	(B), Singleton		Contig formed by a single read
	(C), Expression Location		Tissue gene expression: Leg, Palp, Ovary or shared among tissues (see the key in the Venn Diagram Graph)
	(D), GO_annotation		GO terms obtained with Blast2GO by performing a similarity search with blastx against the NCBInr database. Blast parameters: E-value: 1e-3; Maximum target sequences per transcript: 5
			-, There is not GO term
	(E), InterPro_Domain		InterPro domains obtained with InterProScan (v5.0) from Blast2GO.
			-, No IPS match
	(F), Blast_hit		Blast hit. Transcript with a blastx hit against our own Arthropod database (see below). Blast parameters: E-value: 1e-3; Maximum target sequences per transcript: 5
	(G), HK_hit		HouseKeeping hit. Transcript with a blastx hit against BOTH human and D. melanogaster HK databases (i.e. shared HK_hit). Blast parameters: E-value: 1e-3; Maximum target sequences per transcript: 5
	(H), CEG_hit		Transcript with a blastx hit against CEGMA database. Blast parameters: E-value: 1e-3; Maximum target sequences per transcript: 5
	(I), KEGG_annotation
	Arthropod database	Database including the genome DNA and protein sequences from:
		Hexapods	Drosophila melanogaster; Pediculus humanos
		Crustaceans	Daphnia pulex
		Myriapods	Strigamia maritima
		Chelicerates; mites & ticks	Ixodes scapularis, Metaseiulus occidentalis and Tetranychus urticae
		Chelicerates; scorpions	Mesobuthus martensii
		Chelicerates; spiders	Acanthoscurria geniculata, Latrodectus hesperus, Loxosceles reclusa, Parasteatoda tepidadorium and Stegodyphus sp

## Sheet: Mapped Reads
Table S3.		Summary of the mapped reads per transcript and tissue
ID	Sequence_ID	Contig_ID	Length	Singleton	Expression Location	Reads Leg mapped	Reads Palp Mapped	Reads Ovary Mapped
1	Mcal_1	Contig227.Newo100p95.cap3o60p95	506	No	I	4	0	0
2	Mcal_2	Contig238.Newo100p95.cap3o60p95	475	No	I	4	0	0
3	Mcal_3	Contig251.Newo100p95.cap3o60p95	445	No	I	14	0	0
4	Mcal_4	Contig265.Newo100p95.cap3o60p95	575	No	I	4	0	0
5	Mcal_5	Contig282.Newo100p95.cap3o60p95	827	No	I	5	0	0
6	Mcal_6	Contig288.Newo100p95.cap3o60p95	641	No	I	3	0	0
7	Mcal_7	Contig289.Newo100p95.cap3o60p95	364	No	I	4	0	0
8	Mcal_8	Contig304.Newo100p95.cap3o60p95	660	No	I	4	0	0
9	Mcal_9	Contig313.Newo100p95.cap3o60p95	671	No	I	7	0	0
10	Mcal_10	Contig340.Newo100p95.cap3o60p95	424	No	I	3	0	0
11	Mcal_11	Contig353.Newo100p95.cap3o60p95	209	No	I	3	0	0
12	Mcal_12	Contig354.Newo100p95.cap3o60p95	464	No	I	1	0	0
13	Mcal_13	Contig376.Newo100p95.cap3o60p95	215	No	I	2	0	0
14	Mcal_14	Contig380.Newo100p95.cap3o60p95	595	No	I	4	0	0
15	Mcal_15	Contig382.Newo100p95.cap3o60p95	606	No	I	15	0	0
16	Mcal_16	Contig389.Newo100p95.cap3o60p95	385	No	I	5	0	0
17	Mcal_17	Contig392.Newo100p95.cap3o60p95	382	No	I	6	0	0
18	Mcal_18	Contig393.Newo100p95.cap3o60p95	352	No	I	2	0	0
19	Mcal_19	Contig396.Newo100p95.cap3o60p95	776	No	I	5	0	0
20	Mcal_20	Contig407.Newo100p95.cap3o60p95	327	No	I	4	0	0
21	Mcal_21	Contig412.Newo100p95.cap3o60p95	366	No	I	3	0	0
22	Mcal_22	Contig414.Newo100p95.cap3o60p95	382	No	I	6	0	0
23	Mcal_23	Contig420.Newo100p95.cap3o60p95	120	No	I	2	0	0
24	Mcal_24	Contig424.Newo100p95.cap3o60p95	454	No	I	2	0	0
25	Mcal_25	Contig427.Newo100p95.cap3o60p95	363	No	I	6	0	0
26	Mcal_26	Contig429.Newo100p95.cap3o60p95	387	No	I	2	0	0
27	Mcal_27	Contig430.Newo100p95.cap3o60p95	460	No	I	4	0	0
28	Mcal_28	Contig435.Newo100p95.cap3o60p95	393	No	I	2	0	0
29	Mcal_29	Contig438.Newo100p95.cap3o60p95	230	No	I	2	0	0
30	Mcal_30	Contig440.Newo100p95.cap3o60p95	432	No	I	3	0	0
31	Mcal_31	Contig455.Newo100p95.cap3o60p95	414	No	I	2	0	0
32	Mcal_32	Contig456.Newo100p95.cap3o60p95	771	No	I	3	0	0
33	Mcal_33	Contig458.Newo100p95.cap3o60p95	722	No	I	4	0	0
34	Mcal_34	Contig461.Newo100p95.cap3o60p95	474	No	I	2	0	0
35	Mcal_35	Contig465.Newo100p95.cap3o60p95	413	No	I	2	0	0
36	Mcal_36	Contig471.Newo100p95.cap3o60p95	363	No	I	2	0	0
37	Mcal_37	Contig475.Newo100p95.cap3o60p95	878	No	I	6	0	0
38	Mcal_38	Contig481.Newo100p95.cap3o60p95	389	No	I	2	0	0
39	Mcal_39	Contig482.Newo100p95.cap3o60p95	417	No	I	2	0	0
40	Mcal_40	Contig484.Newo100p95.cap3o60p95	790	No	I	3	0	0
41	Mcal_41	Contig486.Newo100p95.cap3o60p95	241	No	I	1	0	0
42	Mcal_42	Contig496.Newo100p95.cap3o60p95	726	No	I	3	0	0
43	Mcal_43	Contig499.Newo100p95.cap3o60p95	591	No	I	3	0	0
44	Mcal_44	Contig502.Newo100p95.cap3o60p95	641	No	I	5	0	0
45	Mcal_45	Contig508.Newo100p95.cap3o60p95	371	No	I	2	0	0
46	Mcal_46	Contig509.Newo100p95.cap3o60p95	472	No	I	3	0	0
47	Mcal_47	Contig512.Newo100p95.cap3o60p95	414	No	I	4	0	0
48	Mcal_48	Contig515.Newo100p95.cap3o60p95	478	No	I	2	0	0
49	Mcal_49	Contig518.Newo100p95.cap3o60p95	533	No	I	2	0	0
50	Mcal_50	Contig520.Newo100p95.cap3o60p95	433	No	I	2	0	0
51	Mcal_51	Contig529.Newo100p95.cap3o60p95	360	No	I	2	0	0
52	Mcal_52	Contig530.Newo100p95.cap3o60p95	359	No	I	1	0	7
53	Mcal_53	Contig536.Newo100p95.cap3o60p95	644	No	I	3	0	0
54	Mcal_54	Contig539.Newo100p95.cap3o60p95	528	No	I	2	0	0
55	Mcal_55	Contig542.Newo100p95.cap3o60p95	757	No	I	2	0	0
56	Mcal_56	Contig544.Newo100p95.cap3o60p95	549	No	I	2	0	0
57	Mcal_57	Contig555.Newo100p95.cap3o60p95	197	No	I	1	0	0
58	Mcal_58	Contig557.Newo100p95.cap3o60p95	532	No	I	3	0	0
59	Mcal_59	Contig84.Newo100p95.cap3o60p95	1433	No	I	5	0	0
60	Mcal_60	Contig997.Newo100p95.cap3o60p95	466	No	I	1	0	0
61	Mcal_61	G232G8W04H03HN_leg	218	Yes	I	1	0	0
62	Mcal_62	G232G8W04H045U_leg	167	Yes	I	2	0	0
63	Mcal_63	G232G8W04H0J0K_leg	425	Yes	I	1	0	0
64	Mcal_64	G232G8W04H0JU9_leg	212	Yes	I	3	0	0
65	Mcal_65	G232G8W04H0QOT_leg	266	Yes	I	1	0	0
66	Mcal_66	G232G8W04H0V2L_leg	394	Yes	I	1	0	0
67	Mcal_67	G232G8W04H10EO_leg	336	Yes	I	1	0	0
68	Mcal_68	G232G8W04H16D4_leg	170	Yes	I	1	0	0
69	Mcal_69	G232G8W04H16HV_leg	454	Yes	I	1	0	0
70	Mcal_70	G232G8W04H1B2G_leg	292	Yes	I	2	0	0
71	Mcal_71	G232G8W04H1CTJ_leg	339	Yes	I	1	0	0
72	Mcal_72	G232G8W04H1FKW_leg	268	Yes	I	2	0	0
73	Mcal_73	G232G8W04H1FU2_leg	351	Yes	I	1	0	0
74	Mcal_74	G232G8W04H1HRV_leg	289	Yes	I	1	0	0
75	Mcal_75	G232G8W04H1IRO_leg	231	Yes	I	1	0	0
76	Mcal_76	G232G8W04H1N12_leg	299	Yes	I	1	0	0
77	Mcal_77	G232G8W04H1U28_leg	263	Yes	I	4	0	0
78	Mcal_78	G232G8W04H1XWT_leg	385	Yes	I	4	0	0
79	Mcal_79	G232G8W04H20AK_leg	306	Yes	I	1	0	0
80	Mcal_80	G232G8W04H20GB_leg	327	Yes	I	1	0	0
81	Mcal_81	G232G8W04H20JT_leg	202	Yes	I	1	0	0
82	Mcal_82	G232G8W04H27A4_leg	369	Yes	I	1	0	0
83	Mcal_83	G232G8W04H29VG_leg	390	Yes	I	1	0	0
84	Mcal_84	G232G8W04H2DO8_leg	355	Yes	I	1	0	1
85	Mcal_85	G232G8W04H2HSH_leg	347	Yes	I	1	0	0
86	Mcal_86	G232G8W04H2HTK_leg	317	Yes	I	1	0	0
87	Mcal_87	G232G8W04H2I02_leg	387	Yes	I	1	0	0
88	Mcal_88	G232G8W04H2JON_leg	218	Yes	I	1	0	0
89	Mcal_89	G232G8W04H2N15_leg	156	Yes	I	1	0	0
90	Mcal_90	G232G8W04H2OLS_leg	338	Yes	I	1	0	0
91	Mcal_91	G232G8W04H2UDL_leg	202	Yes	I	1	0	0
92	Mcal_92	G232G8W04H2Z2U_leg	339	Yes	I	1	0	0
93	Mcal_93	G232G8W04H33PL_leg	115	Yes	I	1	0	0
94	Mcal_94	G232G8W04H36U4_leg	213	Yes	I	1	0	0
95	Mcal_95	G232G8W04H37AG_leg	248	Yes	I	1	0	0
96	Mcal_96	G232G8W04H3B3G_leg	265	Yes	I	1	0	0
97	Mcal_97	G232G8W04H3C0W_leg	351	Yes	I	1	0	0
98	Mcal_98	G232G8W04H3FI9_leg	209	Yes	I	1	0	0
99	Mcal_99	G232G8W04H3UYW_leg	125	Yes	I	1	0	0
100	Mcal_100	G232G8W04H3V68_leg	314	Yes	I	1	0	0
101	Mcal_101	G232G8W04H3VXO_leg	141	Yes	I	1	0	0
102	Mcal_102	G232G8W04H41YN_leg	249	Yes	I	1	0	0
103	Mcal_103	G232G8W04H43MK_leg	383	Yes	I	2	0	0
104	Mcal_104	G232G8W04H44R2_leg	296	Yes	I	1	0	0
105	Mcal_105	G232G8W04H48VD_leg	112	Yes	I	1	0	0
106	Mcal_106	G232G8W04H49K2_leg	306	Yes	I	1	0	0
107	Mcal_107	G232G8W04H4AXR_leg	421	Yes	I	1	0	0
108	Mcal_108	G232G8W04H4BB6_leg	324	Yes	I	1	0	0
109	Mcal_109	G232G8W04H4DLJ_leg	319	Yes	I	1	0	0
110	Mcal_110	G232G8W04H4FGI_leg	161	Yes	I	1	0	0
111	Mcal_111	G232G8W04H4HB2_leg	392	Yes	I	1	0	0
112	Mcal_112	G232G8W04H4JY5_leg	368	Yes	I	1	0	0
113	Mcal_113	G232G8W04H4L5D_leg	276	Yes	I	1	0	0
114	Mcal_114	G232G8W04H4MUA_leg	278	Yes	I	1	0	0
115	Mcal_115	G232G8W04H4N5Y_leg	278	Yes	I	1	0	0
116	Mcal_116	G232G8W04H4NOG_leg	172	Yes	I	1	0	0
117	Mcal_117	G232G8W04H4QFK_leg	297	Yes	I	1	0	0
118	Mcal_118	G232G8W04H4S50_leg	104	Yes	I	1	0	0
119	Mcal_119	G232G8W04H4SIV_leg	339	Yes	I	1	0	0
120	Mcal_120	G232G8W04H4V7V_leg	101	Yes	I	1	0	0
121	Mcal_121	G232G8W04H4VNS_leg	405	Yes	I	1	0	0
122	Mcal_122	G232G8W04H51PW_leg	277	Yes	I	1	0	0
123	Mcal_123	G232G8W04H52EE_leg	329	Yes	I	1	0	0
124	Mcal_124	G232G8W04H52T6_leg	315	Yes	I	1	0	0
125	Mcal_125	G232G8W04H53IN_leg	312	Yes	I	1	0	0
126	Mcal_126	G232G8W04H58I1_leg	364	Yes	I	1	0	0
127	Mcal_127	G232G8W04H5AA8_leg	341	Yes	I	1	0	0
128	Mcal_128	G232G8W04H5AGH_leg	306	Yes	I	1	0	0
129	Mcal_129	G232G8W04H5BDA_leg	447	Yes	I	1	0	0
130	Mcal_130	G232G8W04H5DMB_leg	387	Yes	I	1	0	0
131	Mcal_131	G232G8W04H5F6W_leg	293	Yes	I	1	0	0
132	Mcal_132	G232G8W04H5ID0_leg	132	Yes	I	1	0	0
133	Mcal_133	G232G8W04H5JRN_leg	367	Yes	I	1	0	0
134	Mcal_134	G232G8W04H5KDP_leg	180	Yes	I	1	0	0
135	Mcal_135	G232G8W04H5M9P_leg	396	Yes	I	1	0	0
136	Mcal_136	G232G8W04H5MT7_leg	117	Yes	I	1	0	0
137	Mcal_137	G232G8W04H5MUO_leg	422	Yes	I	1	0	0
138	Mcal_138	G232G8W04H5NSK_leg	364	Yes	I	1	0	0
139	Mcal_139	G232G8W04H5NT4_leg	168	Yes	I	1	0	1
140	Mcal_140	G232G8W04H5QF8_leg	318	Yes	I	1	0	0
141	Mcal_141	G232G8W04H5R8E_leg	360	Yes	I	1	0	0
142	Mcal_142	G232G8W04H5VA3_leg	337	Yes	I	1	0	0
143	Mcal_143	G232G8W04H6105_leg	323	Yes	I	1	0	0
144	Mcal_144	G232G8W04H62EW_leg	333	Yes	I	1	0	0
145	Mcal_145	G232G8W04H62KM_leg	225	Yes	I	1	0	0
146	Mcal_146	G232G8W04H65B1_leg	321	Yes	I	1	0	0
147	Mcal_147	G232G8W04H65G0_leg	134	Yes	I	1	0	0
148	Mcal_148	G232G8W04H67P5_leg	426	Yes	I	1	0	0
149	Mcal_149	G232G8W04H67S2_leg	151	Yes	I	1	0	0
150	Mcal_150	G232G8W04H697O_leg	210	Yes	I	1	0	0
151	Mcal_151	G232G8W04H6BA8_leg	282	Yes	I	1	0	0
152	Mcal_152	G232G8W04H6CMK_leg	420	Yes	I	1	0	0
153	Mcal_153	G232G8W04H6DD3_leg	390	Yes	I	1	0	0
154	Mcal_154	G232G8W04H6F0F_leg	200	Yes	I	1	0	0
155	Mcal_155	G232G8W04H6F8D_leg	393	Yes	I	1	0	0
156	Mcal_156	G232G8W04H6HZG_leg	193	Yes	I	1	0	0
157	Mcal_157	G232G8W04H6I2F_leg	380	Yes	I	1	0	0
158	Mcal_158	G232G8W04H6JMP_leg	299	Yes	I	1	0	0
159	Mcal_159	G232G8W04H6O45_leg	279	Yes	I	1	0	0
160	Mcal_160	G232G8W04H6S36_leg	358	Yes	I	1	0	0
161	Mcal_161	G232G8W04H6XDI_leg	188	Yes	I	1	0	0
162	Mcal_162	G232G8W04H6XKA_leg	407	Yes	I	1	0	0
163	Mcal_163	G232G8W04H6XOJ_leg	119	Yes	I	1	0	0
164	Mcal_164	G232G8W04H6XVE_leg	340	Yes	I	1	0	0
165	Mcal_165	G232G8W04H6ZJS_leg	169	Yes	I	1	0	0
166	Mcal_166	G232G8W04H71UZ_leg	246	Yes	I	1	0	0
167	Mcal_167	G232G8W04H74M9_leg	368	Yes	I	1	0	0
168	Mcal_168	G232G8W04H7549_leg	359	Yes	I	1	0	0
169	Mcal_169	G232G8W04H75XX_leg	245	Yes	I	1	0	0
170	Mcal_170	G232G8W04H7AUX_leg	394	Yes	I	1	0	0
171	Mcal_171	G232G8W04H7BBT_leg	249	Yes	I	1	0	0
172	Mcal_172	G232G8W04H7E5J_leg	444	Yes	I	1	0	0
173	Mcal_173	G232G8W04H7IDF_leg	225	Yes	I	1	0	0
174	Mcal_174	G232G8W04H7JNY_leg	351	Yes	I	1	0	0
175	Mcal_175	G232G8W04H7N92_leg	113	Yes	I	1	0	0
176	Mcal_176	G232G8W04H7NLB_leg	371	Yes	I	1	0	0
177	Mcal_177	G232G8W04H7OFQ_leg	345	Yes	I	1	0	0
178	Mcal_178	G232G8W04H7TN0_leg	110	Yes	I	1	0	0
179	Mcal_179	G232G8W04H7TNY_leg	158	Yes	I	1	0	0
180	Mcal_180	G232G8W04H7UG6_leg	140	Yes	I	1	0	0
181	Mcal_181	G232G8W04H8055_leg	253	Yes	I	1	0	0
182	Mcal_182	G232G8W04H81MB_leg	485	Yes	I	1	0	0
183	Mcal_183	G232G8W04H823E_leg	146	Yes	I	1	0	0
184	Mcal_184	G232G8W04H829N_leg	183	Yes	I	1	0	0
185	Mcal_185	G232G8W04H8IQ7_leg	375	Yes	I	2	0	0
186	Mcal_186	G232G8W04H8MOZ_leg	378	Yes	I	1	0	0
187	Mcal_187	G232G8W04H8QAS_leg	185	Yes	I	1	0	0
188	Mcal_188	G232G8W04H8QFL_leg	172	Yes	I	1	0	0
189	Mcal_189	G232G8W04H8QH5_leg	400	Yes	I	1	0	0
190	Mcal_190	G232G8W04H8QRA_leg	100	Yes	I	1	0	0
191	Mcal_191	G232G8W04H8U7G_leg	218	Yes	I	1	0	0
192	Mcal_192	G232G8W04H94OL_leg	364	Yes	I	1	0	0
193	Mcal_193	G232G8W04H9619_leg	207	Yes	I	1	0	0
194	Mcal_194	G232G8W04H9AYZ_leg	352	Yes	I	1	0	0
195	Mcal_195	G232G8W04H9G2K_leg	273	Yes	I	1	0	0
196	Mcal_196	G232G8W04H9H4L_leg	224	Yes	I	1	0	0
197	Mcal_197	G232G8W04H9H97_leg	335	Yes	I	1	0	0
198	Mcal_198	G232G8W04H9IC4_leg	229	Yes	I	1	0	0
199	Mcal_199	G232G8W04H9IYM_leg	199	Yes	I	1	0	0
200	Mcal_200	G232G8W04H9JPI_leg	101	Yes	I	1	0	0
201	Mcal_201	G232G8W04H9JR4_leg	122	Yes	I	1	0	0
202	Mcal_202	G232G8W04H9LU6_leg	409	Yes	I	1	0	0
203	Mcal_203	G232G8W04H9OFW_leg	192	Yes	I	1	0	0
204	Mcal_204	G232G8W04H9U8Q_leg	342	Yes	I	1	0	0
205	Mcal_205	G232G8W04H9UDM_leg	208	Yes	I	1	0	0
206	Mcal_206	G232G8W04H9UJW_leg	396	Yes	I	1	0	0
207	Mcal_207	G232G8W04H9VH8_leg	420	Yes	I	2	0	0
208	Mcal_208	G232G8W04H9X7M_leg	172	Yes	I	1	0	0
209	Mcal_209	G232G8W04H9Z1N_leg	369	Yes	I	1	0	0
210	Mcal_210	G232G8W04I0ADF_leg	314	Yes	I	1	0	0
211	Mcal_211	G232G8W04I0E1L_leg	124	Yes	I	1	0	0
212	Mcal_212	G232G8W04I0E63_leg	393	Yes	I	1	0	0
213	Mcal_213	G232G8W04I0LPW_leg	393	Yes	I	1	0	0
214	Mcal_214	G232G8W04I0QDR_leg	287	Yes	I	1	0	0
215	Mcal_215	G232G8W04I0QKL_leg	221	Yes	I	1	0	0
216	Mcal_216	G232G8W04I0S9F_leg	274	Yes	I	1	0	0
217	Mcal_217	G232G8W04I0UWD_leg	345	Yes	I	1	0	0
218	Mcal_218	G232G8W04I0V03_leg	118	Yes	I	1	0	0
219	Mcal_219	G232G8W04I0W50_leg	125	Yes	I	1	0	0
220	Mcal_220	G232G8W04I0WTV_leg	268	Yes	I	1	0	0
221	Mcal_221	G232G8W04I0YU2_leg	224	Yes	I	1	0	0
222	Mcal_222	G232G8W04I11IT_leg	356	Yes	I	1	0	0
223	Mcal_223	G232G8W04I120G_leg	259	Yes	I	1	0	0
224	Mcal_224	G232G8W04I147P_leg	437	Yes	I	1	0	0
225	Mcal_225	G232G8W04I15CP_leg	132	Yes	I	1	0	0
226	Mcal_226	G232G8W04I16P6_leg	359	Yes	I	1	0	0
227	Mcal_227	G232G8W04I1BRN_leg	131	Yes	I	1	0	0
228	Mcal_228	G232G8W04I1FK7_leg	379	Yes	I	1	0	0
229	Mcal_229	G232G8W04I1SLO_leg	484	Yes	I	1	0	0
230	Mcal_230	G232G8W04I1TBC_leg	261	Yes	I	1	0	0
231	Mcal_231	G232G8W04I1W6N_leg	432	Yes	I	3	0	0
232	Mcal_232	G232G8W04I1ZJK_leg	118	Yes	I	1	0	0
233	Mcal_233	G232G8W04I22LO_leg	155	Yes	I	1	0	0
234	Mcal_234	G232G8W04I23SJ_leg	281	Yes	I	1	0	0
235	Mcal_235	G232G8W04I26O2_leg	447	Yes	I	1	0	0
236	Mcal_236	G232G8W04I2DLI_leg	383	Yes	I	1	0	0
237	Mcal_237	G232G8W04I2DTZ_leg	382	Yes	I	1	0	0
238	Mcal_238	G232G8W04I2GJD_leg	424	Yes	I	1	0	0
239	Mcal_239	G232G8W04I2H0I_leg	182	Yes	I	1	0	0
240	Mcal_240	G232G8W04I2HXU_leg	213	Yes	I	1	0	0
241	Mcal_241	G232G8W04I2HXZ_leg	290	Yes	I	1	0	0
242	Mcal_242	G232G8W04I2IPZ_leg	255	Yes	I	1	0	0
243	Mcal_243	G232G8W04I2JU0_leg	239	Yes	I	1	0	0
244	Mcal_244	G232G8W04I2K7Y_leg	382	Yes	I	2	0	0
245	Mcal_245	G232G8W04I2K8C_leg	185	Yes	I	2	0	0
246	Mcal_246	G232G8W04I301V_leg	125	Yes	I	1	0	0
247	Mcal_247	G232G8W04I31KY_leg	159	Yes	I	1	0	0
248	Mcal_248	G232G8W04I31SX_leg	138	Yes	I	1	0	0
249	Mcal_249	G232G8W04I351I_leg	313	Yes	I	1	0	0
250	Mcal_250	G232G8W04I381Q_leg	111	Yes	I	1	0	0
251	Mcal_251	G232G8W04I38JJ_leg	282	Yes	I	1	0	0
252	Mcal_252	G232G8W04I3A25_leg	369	Yes	I	1	0	0
253	Mcal_253	G232G8W04I3BJR_leg	408	Yes	I	1	0	0
254	Mcal_254	G232G8W04I3CMU_leg	336	Yes	I	4	0	0
255	Mcal_255	G232G8W04I3CN5_leg	423	Yes	I	1	0	0
256	Mcal_256	G232G8W04I3F9U_leg	322	Yes	I	1	0	0
257	Mcal_257	G232G8W04I3GC8_leg	248	Yes	I	1	0	0
258	Mcal_258	G232G8W04I3MAR_leg	414	Yes	I	1	0	0
259	Mcal_259	G232G8W04I3OBE_leg	363	Yes	I	1	0	0
260	Mcal_260	G232G8W04I3PL2_leg	195	Yes	I	1	0	0
261	Mcal_261	G232G8W04I3PMG_leg	148	Yes	I	1	0	0
262	Mcal_262	G232G8W04I3QCZ_leg	277	Yes	I	1	0	0
263	Mcal_263	G232G8W04I3S7K_leg	318	Yes	I	1	0	0
264	Mcal_264	G232G8W04I3SFQ_leg	140	Yes	I	1	0	0
265	Mcal_265	G232G8W04I3TIL_leg	146	Yes	I	1	0	0
266	Mcal_266	G232G8W04I3U80_leg	411	Yes	I	1	0	0
267	Mcal_267	G232G8W04I3Y0E_leg	335	Yes	I	1	0	0
268	Mcal_268	G232G8W04I42V2_leg	349	Yes	I	1	0	0
269	Mcal_269	G232G8W04I43IR_leg	272	Yes	I	1	0	0
270	Mcal_270	G232G8W04I43PP_leg	291	Yes	I	4	0	0
271	Mcal_271	G232G8W04I45UX_leg	116	Yes	I	1	0	0
272	Mcal_272	G232G8W04I46NB_leg	446	Yes	I	1	0	0
273	Mcal_273	G232G8W04I48MX_leg	156	Yes	I	1	0	0
274	Mcal_274	G232G8W04I4A2V_leg	315	Yes	I	1	0	0
275	Mcal_275	G232G8W04I4B3Q_leg	119	Yes	I	1	0	0
276	Mcal_276	G232G8W04I4BV4_leg	122	Yes	I	1	0	0
277	Mcal_277	G232G8W04I4EF1_leg	328	Yes	I	1	0	0
278	Mcal_278	G232G8W04I4G4Y_leg	289	Yes	I	1	0	0
279	Mcal_279	G232G8W04I4GDC_leg	321	Yes	I	1	0	0
280	Mcal_280	G232G8W04I4HM9_leg	449	Yes	I	1	0	0
281	Mcal_281	G232G8W04I4KYQ_leg	291	Yes	I	1	0	0
282	Mcal_282	G232G8W04I4LFJ_leg	344	Yes	I	1	0	0
283	Mcal_283	G232G8W04I4LSW_leg	270	Yes	I	1	0	0
284	Mcal_284	G232G8W04I4NBQ_leg	319	Yes	I	1	0	0
285	Mcal_285	G232G8W04I4QOJ_leg	168	Yes	I	1	0	0
286	Mcal_286	G232G8W04I4R09_leg	121	Yes	I	2	0	0
287	Mcal_287	G232G8W04I4X1A_leg	420	Yes	I	1	0	0
288	Mcal_288	G232G8W04I4YLY_leg	292	Yes	I	1	0	0
289	Mcal_289	G232G8W04I4ZJ0_leg	188	Yes	I	1	0	0
290	Mcal_290	G232G8W04I514X_leg	340	Yes	I	1	0	0
291	Mcal_291	G232G8W04I52HW_leg	177	Yes	I	2	0	0
292	Mcal_292	G232G8W04I55MD_leg	311	Yes	I	1	0	0
293	Mcal_293	G232G8W04I56UK_leg	477	Yes	I	1	0	0
294	Mcal_294	G232G8W04I582G_leg	272	Yes	I	1	0	0
295	Mcal_295	G232G8W04I59ZS_leg	117	Yes	I	1	0	0
296	Mcal_296	G232G8W04I5C7J_leg	115	Yes	I	1	0	0
297	Mcal_297	G232G8W04I5E2G_leg	350	Yes	I	1	0	0
298	Mcal_298	G232G8W04I5I8X_leg	433	Yes	I	1	0	0
299	Mcal_299	G232G8W04I5O7F_leg	151	Yes	I	1	0	0
300	Mcal_300	G232G8W04I5OEC_leg	294	Yes	I	1	0	0
301	Mcal_301	G232G8W04I5P1F_leg	417	Yes	I	1	0	0
302	Mcal_302	G232G8W04I5QFT_leg	371	Yes	I	1	0	0
303	Mcal_303	G232G8W04I61N8_leg	407	Yes	I	3	0	0
304	Mcal_304	G232G8W04I65AJ_leg	119	Yes	I	1	0	0
305	Mcal_305	G232G8W04I65K7_leg	385	Yes	I	1	0	0
306	Mcal_306	G232G8W04I6ACP_leg	433	Yes	I	1	0	0
307	Mcal_307	G232G8W04I6CCU_leg	388	Yes	I	1	0	0
308	Mcal_308	G232G8W04I6FFX_leg	154	Yes	I	3	0	0
309	Mcal_309	G232G8W04I6IDN_leg	338	Yes	I	1	0	0
310	Mcal_310	G232G8W04I6O7R_leg	191	Yes	I	1	0	0
311	Mcal_311	G232G8W04I6USX_leg	198	Yes	I	1	0	0
312	Mcal_312	G232G8W04I6XKE_leg	240	Yes	I	1	0	0
313	Mcal_313	G232G8W04I6Y9L_leg	247	Yes	I	1	0	0
314	Mcal_314	G232G8W04I72QL_leg	206	Yes	I	1	0	0
315	Mcal_315	G232G8W04I77LU_leg	252	Yes	I	1	0	0
316	Mcal_316	G232G8W04I7C7T_leg	393	Yes	I	1	0	0
317	Mcal_317	G232G8W04I7F5R_leg	257	Yes	I	1	0	0
318	Mcal_318	G232G8W04I7JCI_leg	266	Yes	I	1	0	0
319	Mcal_319	G232G8W04I7KIS_leg	248	Yes	I	1	0	0
320	Mcal_320	G232G8W04I7LIN_leg	293	Yes	I	1	0	0
321	Mcal_321	G232G8W04I7M4Q_leg	159	Yes	I	1	0	0
322	Mcal_322	G232G8W04I7P9Z_leg	164	Yes	I	1	0	0
323	Mcal_323	G232G8W04I7QF1_leg	233	Yes	I	1	0	0
324	Mcal_324	G232G8W04I7SZL_leg	402	Yes	I	1	0	0
325	Mcal_325	G232G8W04I7UWQ_leg	330	Yes	I	1	0	0
326	Mcal_326	G232G8W04I7XCK_leg	223	Yes	I	1	0	0
327	Mcal_327	G232G8W04I84NJ_leg	324	Yes	I	1	0	0
328	Mcal_328	G232G8W04I84ZB_leg	367	Yes	I	1	0	0
329	Mcal_329	G232G8W04I8AHB_leg	346	Yes	I	1	0	0
330	Mcal_330	G232G8W04I8DDW_leg	188	Yes	I	1	0	0
331	Mcal_331	G232G8W04I8J9R_leg	253	Yes	I	1	0	0
332	Mcal_332	G232G8W04I8JNC_leg	401	Yes	I	1	0	0
333	Mcal_333	G232G8W04I8M6B_leg	331	Yes	I	1	0	0
334	Mcal_334	G232G8W04I8TC5_leg	216	Yes	I	1	0	0
335	Mcal_335	G232G8W04I8THY_leg	445	Yes	I	1	0	0
336	Mcal_336	G232G8W04I92OY_leg	326	Yes	I	2	0	0
337	Mcal_337	G232G8W04I94NF_leg	179	Yes	I	1	0	0
338	Mcal_338	G232G8W04I96FI_leg	330	Yes	I	1	0	0
339	Mcal_339	G232G8W04I9BNB_leg	443	Yes	I	1	0	0
340	Mcal_340	G232G8W04I9E9D_leg	368	Yes	I	1	0	0
341	Mcal_341	G232G8W04I9HT8_leg	401	Yes	I	1	0	0
342	Mcal_342	G232G8W04I9KTF_leg	235	Yes	I	1	0	0
343	Mcal_343	G232G8W04I9TFB_leg	249	Yes	I	1	0	0
344	Mcal_344	G232G8W04I9WX2_leg	248	Yes	I	1	0	0
345	Mcal_345	G232G8W04IA22C_leg	193	Yes	I	1	0	0
346	Mcal_346	G232G8W04IA898_leg	385	Yes	I	2	0	0
347	Mcal_347	G232G8W04IA8PX_leg	363	Yes	I	1	0	0
348	Mcal_348	G232G8W04IAG2Y_leg	275	Yes	I	1	0	0
349	Mcal_349	G232G8W04IAKIZ_leg	182	Yes	I	1	0	0
350	Mcal_350	G232G8W04IANKK_leg	181	Yes	I	1	0	0
351	Mcal_351	G232G8W04IAQ27_leg	143	Yes	I	1	0	0
352	Mcal_352	G232G8W04IAWOB_leg	502	Yes	I	1	0	0
353	Mcal_353	G232G8W04IAWT5_leg	111	Yes	I	1	0	0
354	Mcal_354	G232G8W04IAY1L_leg	250	Yes	I	1	0	0
355	Mcal_355	G232G8W04IAYAT_leg	171	Yes	I	1	0	0
356	Mcal_356	G232G8W04IB2RY_leg	354	Yes	I	1	0	0
357	Mcal_357	G232G8W04IB4E4_leg	301	Yes	I	1	0	0
358	Mcal_358	G232G8W04IB8PY_leg	425	Yes	I	1	0	0
359	Mcal_359	G232G8W04IBAYN_leg	232	Yes	I	1	0	0
360	Mcal_360	G232G8W04IBCTE_leg	391	Yes	I	1	0	0
361	Mcal_361	G232G8W04IBXV7_leg	463	Yes	I	1	0	0
362	Mcal_362	G232G8W04IBZDW_leg	253	Yes	I	1	0	0
363	Mcal_363	G232G8W04IC3V5_leg	356	Yes	I	1	0	0
364	Mcal_364	G232G8W04IC4IF_leg	123	Yes	I	1	0	0
365	Mcal_365	G232G8W04IC575_leg	374	Yes	I	1	0	0
366	Mcal_366	G232G8W04IC6KJ_leg	150	Yes	I	1	0	0
367	Mcal_367	G232G8W04IC8E7_leg	290	Yes	I	1	0	0
368	Mcal_368	G232G8W04IC96T_leg	357	Yes	I	1	0	0
369	Mcal_369	G232G8W04ICAZ7_leg	179	Yes	I	1	0	0
370	Mcal_370	G232G8W04ICBSD_leg	179	Yes	I	1	0	0
371	Mcal_371	G232G8W04ICCAP_leg	314	Yes	I	1	0	0
372	Mcal_372	G232G8W04ICERP_leg	393	Yes	I	1	0	0
373	Mcal_373	G232G8W04ICKKY_leg	153	Yes	I	1	0	0
374	Mcal_374	G232G8W04ICKNG_leg	342	Yes	I	1	0	0
375	Mcal_375	G232G8W04ICNIQ_leg	379	Yes	I	2	0	0
376	Mcal_376	G232G8W04ICQ4H_leg	222	Yes	I	1	0	0
377	Mcal_377	G232G8W04ICUZK_leg	306	Yes	I	1	0	0
378	Mcal_378	G232G8W04ID2C5_leg	138	Yes	I	1	0	0
379	Mcal_379	G232G8W04ID4PF_leg	357	Yes	I	1	0	0
380	Mcal_380	G232G8W04IDHCC_leg	305	Yes	I	1	0	0
381	Mcal_381	G232G8W04IDJ8M_leg	130	Yes	I	1	0	0
382	Mcal_382	G232G8W04IDMH3_leg	322	Yes	I	1	0	0
383	Mcal_383	G232G8W04IDPDV_leg	356	Yes	I	1	0	0
384	Mcal_384	G232G8W04IDUX7_leg	364	Yes	I	1	0	0
385	Mcal_385	G232G8W04IE90G_leg	425	Yes	I	1	0	0
386	Mcal_386	G232G8W04IEBIC_leg	362	Yes	I	1	0	0
387	Mcal_387	G232G8W04IEBV4_leg	233	Yes	I	1	0	0
388	Mcal_388	G232G8W04IEEVL_leg	237	Yes	I	1	0	0
389	Mcal_389	G232G8W04IEON7_leg	386	Yes	I	1	0	0
390	Mcal_390	G232G8W04IEPB0_leg	203	Yes	I	1	0	0
391	Mcal_391	G232G8W04IEPC6_leg	381	Yes	I	1	0	0
392	Mcal_392	G232G8W04IEPK2_leg	320	Yes	I	1	0	0
393	Mcal_393	G232G8W04IEQ5F_leg	222	Yes	I	1	0	0
394	Mcal_394	G232G8W04IEST4_leg	381	Yes	I	1	0	0
395	Mcal_395	G232G8W04IEWMV_leg	323	Yes	I	1	0	0
396	Mcal_396	G232G8W04IEZSO_leg	154	Yes	I	1	0	0
397	Mcal_397	G232G8W04IF1Q0_leg	305	Yes	I	1	0	0
398	Mcal_398	G232G8W04IF27M_leg	368	Yes	I	1	0	0
399	Mcal_399	G232G8W04IF58R_leg	238	Yes	I	1	0	0
400	Mcal_400	G232G8W04IF6L1_leg	224	Yes	I	1	0	0
401	Mcal_401	G232G8W04IF79S_leg	219	Yes	I	1	0	0
402	Mcal_402	G232G8W04IF7UO_leg	169	Yes	I	1	0	0
403	Mcal_403	G232G8W04IFBKA_leg	363	Yes	I	1	0	0
404	Mcal_404	G232G8W04IFDIL_leg	182	Yes	I	1	0	0
405	Mcal_405	G232G8W04IFEWQ_leg	287	Yes	I	1	0	0
406	Mcal_406	G232G8W04IFH3T_leg	283	Yes	I	1	0	0
407	Mcal_407	G232G8W04IFK2X_leg	298	Yes	I	1	0	0
408	Mcal_408	G232G8W04IFL67_leg	383	Yes	I	1	0	0
409	Mcal_409	G232G8W04IFM98_leg	311	Yes	I	1	0	0
410	Mcal_410	G232G8W04IFMIJ_leg	341	Yes	I	1	0	0
411	Mcal_411	G232G8W04IFOZ0_leg	317	Yes	I	1	0	0
412	Mcal_412	G232G8W04IFPGZ_leg	150	Yes	I	1	0	0
413	Mcal_413	G232G8W04IFPTL_leg	383	Yes	I	1	0	0
414	Mcal_414	G232G8W04IFQSV_leg	362	Yes	I	1	0	0
415	Mcal_415	G232G8W04IFSIR_leg	370	Yes	I	1	0	0
416	Mcal_416	G232G8W04IFWKK_leg	139	Yes	I	1	0	0
417	Mcal_417	G232G8W04IG1QL_leg	124	Yes	I	1	0	0
418	Mcal_418	G232G8W04IG3SG_leg	236	Yes	I	1	0	0
419	Mcal_419	G232G8W04IG68K_leg	281	Yes	I	1	0	0
420	Mcal_420	G232G8W04IGI1G_leg	477	Yes	I	1	0	0
421	Mcal_421	G232G8W04IGMLH_leg	240	Yes	I	1	0	0
422	Mcal_422	G232G8W04IGO2G_leg	121	Yes	I	1	0	0
423	Mcal_423	G232G8W04IGOVG_leg	324	Yes	I	1	0	0
424	Mcal_424	G232G8W04IGP9R_leg	371	Yes	I	1	0	0
425	Mcal_425	G232G8W04IGT29_leg	131	Yes	I	1	0	0
426	Mcal_426	G232G8W04IGWM5_leg	217	Yes	I	1	0	0
427	Mcal_427	G232G8W04IGXLP_leg	430	Yes	I	1	0	0
428	Mcal_428	G232G8W04IGZDN_leg	286	Yes	I	1	0	0
429	Mcal_429	G232G8W04IH08B_leg	387	Yes	I	1	0	0
430	Mcal_430	G232G8W04IH3DG_leg	278	Yes	I	1	0	0
431	Mcal_431	G232G8W04IH5JI_leg	313	Yes	I	1	0	1
432	Mcal_432	G232G8W04IH6YJ_leg	269	Yes	I	1	0	0
433	Mcal_433	G232G8W04IHB0X_leg	396	Yes	I	1	0	0
434	Mcal_434	G232G8W04IHDMS_leg	435	Yes	I	1	0	0
435	Mcal_435	G232G8W04IHEYH_leg	320	Yes	I	2	0	0
436	Mcal_436	G232G8W04IHF6S_leg	309	Yes	I	1	0	0
437	Mcal_437	G232G8W04IHGDW_leg	368	Yes	I	1	0	0
438	Mcal_438	G232G8W04IHNBP_leg	339	Yes	I	1	0	0
439	Mcal_439	G232G8W04IHQGH_leg	355	Yes	I	1	0	0
440	Mcal_440	G232G8W04IHTG4_leg	327	Yes	I	1	0	0
441	Mcal_441	G232G8W04IHUME_leg	441	Yes	I	1	0	0
442	Mcal_442	G232G8W04IHWMM_leg	254	Yes	I	1	0	0
443	Mcal_443	G232G8W04IHWVR_leg	174	Yes	I	1	0	0
444	Mcal_444	G232G8W04IHXI3_leg	447	Yes	I	1	0	0
445	Mcal_445	G232G8W04II3HW_leg	210	Yes	I	1	0	0
446	Mcal_446	G232G8W04II48E_leg	350	Yes	I	1	0	0
447	Mcal_447	G232G8W04II49Y_leg	222	Yes	I	1	0	0
448	Mcal_448	G232G8W04II802_leg	365	Yes	I	1	0	0
449	Mcal_449	G232G8W04II8LJ_leg	176	Yes	I	1	0	0
450	Mcal_450	G232G8W04IIA1Y_leg	334	Yes	I	1	0	0
451	Mcal_451	G232G8W04IIDUC_leg	247	Yes	I	1	0	0
452	Mcal_452	G232G8W04IIF67_leg	338	Yes	I	1	0	0
453	Mcal_453	G232G8W04IILPN_leg	291	Yes	I	1	0	0
454	Mcal_454	G232G8W04IIQEZ_leg	417	Yes	I	1	0	0
455	Mcal_455	G232G8W04IISUT_leg	316	Yes	I	1	0	0
456	Mcal_456	G232G8W04IITA8_leg	284	Yes	I	1	0	0
457	Mcal_457	G232G8W04IITUQ_leg	489	Yes	I	1	0	0
458	Mcal_458	G232G8W04IIVAG_leg	365	Yes	I	1	0	0
459	Mcal_459	G232G8W04IJ70M_leg	377	Yes	I	1	0	0
460	Mcal_460	G232G8W04IJ7GG_leg	471	Yes	I	1	0	0
461	Mcal_461	G232G8W04IJB47_leg	421	Yes	I	1	0	0
462	Mcal_462	G232G8W04IJCCA_leg	390	Yes	I	1	0	0
463	Mcal_463	G232G8W04IJCG8_leg	473	Yes	I	1	9	0
464	Mcal_464	G232G8W04IJDVJ_leg	190	Yes	I	1	0	0
465	Mcal_465	G232G8W04IJFD4_leg	491	Yes	I	1	0	0
466	Mcal_466	G232G8W04IJFGR_leg	501	Yes	I	1	0	0
467	Mcal_467	G232G8W04IJIH5_leg	374	Yes	I	1	0	0
468	Mcal_468	G232G8W04IJISL_leg	424	Yes	I	1	0	0
469	Mcal_469	G232G8W04IJKAY_leg	387	Yes	I	1	0	0
470	Mcal_470	G232G8W04IJMD5_leg	440	Yes	I	1	0	0
471	Mcal_471	G232G8W04IJQGP_leg	208	Yes	I	1	0	0
472	Mcal_472	G232G8W04IJUB6_leg	300	Yes	I	1	0	0
473	Mcal_473	G232G8W04IJUIM_leg	361	Yes	I	1	0	0
474	Mcal_474	G232G8W04IJW20_leg	371	Yes	I	1	0	0
475	Mcal_475	G232G8W04IJX5Q_leg	134	Yes	I	1	0	0
476	Mcal_476	G232G8W04IJZ8Q_leg	272	Yes	I	1	0	0
477	Mcal_477	G232G8W04IK0KB_leg	499	Yes	I	2	0	0
478	Mcal_478	G232G8W04IK2PZ_leg	284	Yes	I	1	0	0
479	Mcal_479	G232G8W04IK6NE_leg	234	Yes	I	1	0	0
480	Mcal_480	G232G8W04IKBCF_leg	382	Yes	I	3	0	0
481	Mcal_481	G232G8W04IKD8S_leg	367	Yes	I	1	0	0
482	Mcal_482	G232G8W04IKELU_leg	268	Yes	I	1	0	0
483	Mcal_483	G232G8W04IKFUS_leg	334	Yes	I	1	0	0
484	Mcal_484	G232G8W04IKJET_leg	378	Yes	I	1	0	0
485	Mcal_485	G232G8W04IKJUF_leg	435	Yes	I	1	0	0
486	Mcal_486	G232G8W04IKQEV_leg	133	Yes	I	1	0	0
487	Mcal_487	G232G8W04IKQZ4_leg	106	Yes	I	1	0	0
488	Mcal_488	G232G8W04IKRR9_leg	277	Yes	I	1	0	0
489	Mcal_489	G232G8W04IKS2C_leg	431	Yes	I	1	0	0
490	Mcal_490	G232G8W04IKWH9_leg	185	Yes	I	1	0	0
491	Mcal_491	G232G8W04IKX4G_leg	255	Yes	I	1	0	0
492	Mcal_492	G232G8W04IKXNC_leg	198	Yes	I	1	0	0
493	Mcal_493	G232G8W04IKZX2_leg	340	Yes	I	1	0	0
494	Mcal_494	G232G8W04IL0FO_leg	265	Yes	I	1	0	0
495	Mcal_495	G232G8W04IL0SR_leg	278	Yes	I	1	0	0
496	Mcal_496	G232G8W04IL1U6_leg	155	Yes	I	1	0	0
497	Mcal_497	G232G8W04IL1ZN_leg	164	Yes	I	1	0	0
498	Mcal_498	G232G8W04IL7K3_leg	353	Yes	I	1	0	0
499	Mcal_499	G232G8W04IL9AU_leg	388	Yes	I	1	0	0
500	Mcal_500	G232G8W04ILANJ_leg	124	Yes	I	2	0	3
501	Mcal_501	G232G8W04ILHMH_leg	101	Yes	I	1	0	0
502	Mcal_502	G232G8W04ILHNH_leg	207	Yes	I	1	0	0
503	Mcal_503	G232G8W04ILHYS_leg	345	Yes	I	1	0	0
504	Mcal_504	G232G8W04ILO5W_leg	402	Yes	I	1	0	0
505	Mcal_505	G232G8W04ILR2H_leg	262	Yes	I	1	0	0
506	Mcal_506	G232G8W04ILWNX_leg	318	Yes	I	1	0	0
507	Mcal_507	G232G8W04ILXSL_leg	268	Yes	I	1	0	0
508	Mcal_508	G232G8W04ILZFZ_leg	414	Yes	I	1	0	0
509	Mcal_509	G232G8W04ILZOM_leg	394	Yes	I	1	0	0
510	Mcal_510	G232G8W04IM054_leg	359	Yes	I	2	0	0
511	Mcal_511	G232G8W04IM7UX_leg	282	Yes	I	1	0	0
512	Mcal_512	G232G8W04IM83S_leg	264	Yes	I	1	0	0
513	Mcal_513	G232G8W04IMAAV_leg	411	Yes	I	1	0	0
514	Mcal_514	G232G8W04IMBYE_leg	382	Yes	I	1	0	0
515	Mcal_515	G232G8W04IMCMF_leg	519	Yes	I	1	0	0
516	Mcal_516	G232G8W04IMEGM_leg	156	Yes	I	1	0	0
517	Mcal_517	G232G8W04IMFHS_leg	197	Yes	I	3	0	0
518	Mcal_518	G232G8W04IMHZI_leg	384	Yes	I	1	0	0
519	Mcal_519	G232G8W04IMLIO_leg	173	Yes	I	1	0	0
520	Mcal_520	G232G8W04IMUR7_leg	127	Yes	I	1	0	0
521	Mcal_521	G232G8W04IMWBB_leg	320	Yes	I	1	0	0
522	Mcal_522	G232G8W04IMWIA_leg	386	Yes	I	1	0	0
523	Mcal_523	G232G8W04IN0QJ_leg	279	Yes	I	1	0	0
524	Mcal_524	G232G8W04IN4YA_leg	371	Yes	I	1	0	0
525	Mcal_525	G232G8W04IN7M1_leg	195	Yes	I	1	0	0
526	Mcal_526	G232G8W04IN7OL_leg	431	Yes	I	1	0	0
527	Mcal_527	G232G8W04IN95Q_leg	338	Yes	I	1	0	0
528	Mcal_528	G232G8W04INCZP_leg	111	Yes	I	1	0	0
529	Mcal_529	G232G8W04ING5N_leg	282	Yes	I	1	0	0
530	Mcal_530	G232G8W04INHI0_leg	345	Yes	I	1	0	0
531	Mcal_531	G232G8W04INKGP_leg	235	Yes	I	1	0	0
532	Mcal_532	G232G8W04INQKT_leg	303	Yes	I	1	0	0
533	Mcal_533	G232G8W04INSKI_leg	360	Yes	I	3	0	0
534	Mcal_534	G232G8W04INVHF_leg	211	Yes	I	1	0	0
535	Mcal_535	G232G8W04INVK7_leg	120	Yes	I	1	0	0
536	Mcal_536	G232G8W04INXWZ_leg	146	Yes	I	1	0	0
537	Mcal_537	G232G8W04IO0A0_leg	375	Yes	I	1	0	0
538	Mcal_538	G232G8W04IO5CW_leg	435	Yes	I	2	0	0
539	Mcal_539	G232G8W04IO6YO_leg	359	Yes	I	1	0	0
540	Mcal_540	G232G8W04IO78R_leg	375	Yes	I	1	0	0
541	Mcal_541	G232G8W04IO7UO_leg	291	Yes	I	1	0	0
542	Mcal_542	G232G8W04IO8N4_leg	136	Yes	I	1	0	0
543	Mcal_543	G232G8W04IOBPY_leg	110	Yes	I	2	0	0
544	Mcal_544	G232G8W04IOD40_leg	365	Yes	I	1	0	0
545	Mcal_545	G232G8W04IOEF5_leg	245	Yes	I	3	0	0
546	Mcal_546	G232G8W04IOFF1_leg	197	Yes	I	1	0	0
547	Mcal_547	G232G8W04IOGDC_leg	244	Yes	I	1	0	0
548	Mcal_548	G232G8W04IOI96_leg	232	Yes	I	1	0	0
549	Mcal_549	G232G8W04IOIJ1_leg	397	Yes	I	1	0	0
550	Mcal_550	G232G8W04IONE5_leg	104	Yes	I	1	0	0
551	Mcal_551	G232G8W04IOO34_leg	403	Yes	I	1	0	0
552	Mcal_552	G232G8W04IOUZA_leg	169	Yes	I	1	0	0
553	Mcal_553	G232G8W04IOX10_leg	371	Yes	I	1	0	0
554	Mcal_554	G232G8W04IP35G_leg	406	Yes	I	1	0	0
555	Mcal_555	G232G8W04IP9HM_leg	448	Yes	I	1	0	0
556	Mcal_556	G232G8W04IPBUQ_leg	186	Yes	I	1	0	0
557	Mcal_557	G232G8W04IPC51_leg	252	Yes	I	1	0	0
558	Mcal_558	G232G8W04IPG56_leg	424	Yes	I	1	0	0
559	Mcal_559	G232G8W04IPMK7_leg	339	Yes	I	3	0	0
560	Mcal_560	G232G8W04IPRDV_leg	193	Yes	I	1	0	0
561	Mcal_561	G232G8W04IPS8U_leg	456	Yes	I	1	0	0
562	Mcal_562	G232G8W04IPUB5_leg	471	Yes	I	1	0	0
563	Mcal_563	G232G8W04IPWYL_leg	231	Yes	I	1	0	0
564	Mcal_564	G232G8W04IQ1C6_leg	356	Yes	I	3	9	0
565	Mcal_565	G232G8W04IQ29C_leg	432	Yes	I	1	0	0
566	Mcal_566	G232G8W04IQ2RD_leg	184	Yes	I	1	0	0
567	Mcal_567	G232G8W04IQ2RZ_leg	364	Yes	I	1	0	0
568	Mcal_568	G232G8W04IQ4OQ_leg	355	Yes	I	1	0	0
569	Mcal_569	G232G8W04IQ8P5_leg	404	Yes	I	1	0	0
570	Mcal_570	G232G8W04IQDTF_leg	389	Yes	I	1	0	0
571	Mcal_571	G232G8W04IQGXL_leg	290	Yes	I	1	0	0
572	Mcal_572	G232G8W04IQGZX_leg	122	Yes	I	1	0	0
573	Mcal_573	G232G8W04IQH0H_leg	334	Yes	I	1	0	0
574	Mcal_574	G232G8W04IQL4N_leg	134	Yes	I	1	0	0
575	Mcal_575	G232G8W04IQMPG_leg	431	Yes	I	1	0	0
576	Mcal_576	G232G8W04IQPBI_leg	388	Yes	I	1	0	0
577	Mcal_577	G232G8W04IQRGX_leg	295	Yes	I	1	0	0
578	Mcal_578	G232G8W04IQRP6_leg	453	Yes	I	1	0	0
579	Mcal_579	G232G8W04IQS8P_leg	324	Yes	I	1	0	0
580	Mcal_580	G232G8W04IQTV4_leg	116	Yes	I	1	0	0
581	Mcal_581	G232G8W04IQU1R_leg	359	Yes	I	1	0	0
582	Mcal_582	G232G8W04IQUA2_leg	255	Yes	I	1	0	0
583	Mcal_583	G232G8W04IQX1O_leg	342	Yes	I	1	0	0
584	Mcal_584	G232G8W04IR07K_leg	123	Yes	I	1	0	0
585	Mcal_585	G232G8W04IR2SR_leg	359	Yes	I	1	0	0
586	Mcal_586	G232G8W04IR3SK_leg	437	Yes	I	1	0	0
587	Mcal_587	G232G8W04IR5X2_leg	283	Yes	I	1	0	0
588	Mcal_588	G232G8W04IR7LY_leg	119	Yes	I	1	0	0
589	Mcal_589	G232G8W04IR8GW_leg	187	Yes	I	1	0	0
590	Mcal_590	G232G8W04IRB8F_leg	224	Yes	I	1	0	0
591	Mcal_591	G232G8W04IRCKI_leg	363	Yes	I	1	0	0
592	Mcal_592	G232G8W04IRDWJ_leg	239	Yes	I	1	0	0
593	Mcal_593	G232G8W04IREJJ_leg	262	Yes	I	1	0	0
594	Mcal_594	G232G8W04IRTHA_leg	117	Yes	I	1	0	0
595	Mcal_595	G232G8W04IRU5B_leg	409	Yes	I	1	0	0
596	Mcal_596	G232G8W04IS0MH_leg	116	Yes	I	1	0	0
597	Mcal_597	G232G8W04IS4QO_leg	256	Yes	I	1	0	0
598	Mcal_598	G232G8W04IS75U_leg	207	Yes	I	2	0	0
599	Mcal_599	G232G8W04IS7XO_leg	121	Yes	I	1	0	0
600	Mcal_600	G232G8W04IS8R6_leg	362	Yes	I	1	0	0
601	Mcal_601	G232G8W04IS8TJ_leg	155	Yes	I	1	0	0
602	Mcal_602	G232G8W04IS8ZV_leg	484	Yes	I	1	0	0
603	Mcal_603	G232G8W04ISF1T_leg	326	Yes	I	1	0	0
604	Mcal_604	G232G8W04ISHM3_leg	246	Yes	I	1	0	0
605	Mcal_605	G232G8W04ISHU4_leg	309	Yes	I	1	0	0
606	Mcal_606	G232G8W04ISI6L_leg	277	Yes	I	1	0	0
607	Mcal_607	G232G8W04ISK3K_leg	270	Yes	I	1	0	0
608	Mcal_608	G232G8W04ISKCF_leg	387	Yes	I	1	0	0
609	Mcal_609	G232G8W04ISLJB_leg	326	Yes	I	1	0	0
610	Mcal_610	G232G8W04ISNT0_leg	442	Yes	I	1	0	0
611	Mcal_611	G232G8W04ISQX7_leg	322	Yes	I	1	0	0
612	Mcal_612	G232G8W04ISSXK_leg	348	Yes	I	1	0	0
613	Mcal_613	G232G8W04ISX39_leg	289	Yes	I	1	0	0
614	Mcal_614	G232G8W04IT07Y_leg	112	Yes	I	1	0	0
615	Mcal_615	G232G8W04IT1VS_leg	305	Yes	I	1	0	0
616	Mcal_616	G232G8W04IT3OJ_leg	510	Yes	I	1	0	0
617	Mcal_617	G232G8W04IT816_leg	253	Yes	I	1	0	0
618	Mcal_618	G232G8W04IT8VM_leg	328	Yes	I	1	0	0
619	Mcal_619	G232G8W04ITBVU_leg	261	Yes	I	1	0	0
620	Mcal_620	G232G8W04ITEBS_leg	246	Yes	I	1	0	0
621	Mcal_621	G232G8W04ITV3R_leg	171	Yes	I	1	0	0
622	Mcal_622	G232G8W04ITVF8_leg	395	Yes	I	1	0	0
623	Mcal_623	G232G8W04IU3KX_leg	406	Yes	I	1	0	0
624	Mcal_624	G232G8W04IU4K0_leg	112	Yes	I	1	0	0
625	Mcal_625	G232G8W04IU7ET_leg	250	Yes	I	1	0	0
626	Mcal_626	G232G8W04IU87W_leg	351	Yes	I	1	0	0
627	Mcal_627	G232G8W04IUECS_leg	411	Yes	I	4	0	0
628	Mcal_628	G232G8W04IUGEV_leg	216	Yes	I	1	0	0
629	Mcal_629	G232G8W04IUIL8_leg	208	Yes	I	1	0	0
630	Mcal_630	G232G8W04IUKHS_leg	488	Yes	I	1	0	0
631	Mcal_631	G232G8W04IUOB9_leg	284	Yes	I	1	0	0
632	Mcal_632	G232G8W04IURNV_leg	375	Yes	I	1	0	0
633	Mcal_633	G232G8W04IUTS9_leg	394	Yes	I	1	0	0
634	Mcal_634	G232G8W04IUTZ2_leg	286	Yes	I	1	0	0
635	Mcal_635	G232G8W04IUV7V_leg	380	Yes	I	1	0	0
636	Mcal_636	G232G8W04IUZM4_leg	169	Yes	I	1	0	0
637	Mcal_637	G232G8W04IV2OA_leg	155	Yes	I	1	0	0
638	Mcal_638	G232G8W04IV527_leg	383	Yes	I	1	0	0
639	Mcal_639	G232G8W04IV8E0_leg	194	Yes	I	1	0	0
640	Mcal_640	G232G8W04IV8P7_leg	150	Yes	I	1	0	0
641	Mcal_641	G232G8W04IVCQ9_leg	336	Yes	I	1	0	0
642	Mcal_642	G232G8W04IVH18_leg	293	Yes	I	1	0	0
643	Mcal_643	G232G8W04IVL75_leg	259	Yes	I	1	0	0
644	Mcal_644	G232G8W04IVPTU_leg	328	Yes	I	1	0	0
645	Mcal_645	G232G8W04IVQSZ_leg	462	Yes	I	1	0	0
646	Mcal_646	G232G8W04IVVK4_leg	224	Yes	I	1	0	0
647	Mcal_647	G232G8W04IVWW2_leg	387	Yes	I	1	0	0
648	Mcal_648	G232G8W04IW1G6_leg	426	Yes	I	1	0	0
649	Mcal_649	G232G8W04IW4L3_leg	358	Yes	I	1	0	0
650	Mcal_650	G232G8W04IW63W_leg	204	Yes	I	1	0	0
651	Mcal_651	G232G8W04IWCOK_leg	248	Yes	I	1	0	0
652	Mcal_652	G232G8W04IWCV5_leg	286	Yes	I	1	0	0
653	Mcal_653	G232G8W04IWFZY_leg	386	Yes	I	1	0	0
654	Mcal_654	G232G8W04IWIX4_leg	409	Yes	I	1	0	0
655	Mcal_655	G232G8W04IWLPH_leg	348	Yes	I	2	0	0
656	Mcal_656	G232G8W04IWRBQ_leg	264	Yes	I	1	0	0
657	Mcal_657	G232G8W04IWVTM_leg	348	Yes	I	1	0	0
658	Mcal_658	G232G8W04IWXFC_leg	218	Yes	I	1	0	0
659	Mcal_659	G232G8W04IWXTD_leg	317	Yes	I	1	0	0
660	Mcal_660	G232G8W04IX1D2_leg	183	Yes	I	1	0	0
661	Mcal_661	G232G8W04IX2TW_leg	408	Yes	I	1	0	0
662	Mcal_662	G232G8W04IX2W7_leg	354	Yes	I	1	0	0
663	Mcal_663	G232G8W04IX6OO_leg	375	Yes	I	1	0	0
664	Mcal_664	G232G8W04IX7WA_leg	210	Yes	I	1	0	0
665	Mcal_665	G232G8W04IX95Y_leg	369	Yes	I	1	0	0
666	Mcal_666	G232G8W04IX9RM_leg	332	Yes	I	1	0	0
667	Mcal_667	G232G8W04IXEJF_leg	171	Yes	I	1	0	0
668	Mcal_668	G232G8W04IXG5H_leg	382	Yes	I	1	0	0
669	Mcal_669	G232G8W04IXIW6_leg	128	Yes	I	1	0	0
670	Mcal_670	G232G8W04IXL2L_leg	321	Yes	I	1	0	0
671	Mcal_671	G232G8W04IXMIF_leg	323	Yes	I	1	0	0
672	Mcal_672	G232G8W04IXMK3_leg	169	Yes	I	1	0	0
673	Mcal_673	G232G8W04IXN5X_leg	283	Yes	I	1	0	0
674	Mcal_674	G232G8W04IXP3O_leg	342	Yes	I	1	0	0
675	Mcal_675	G232G8W04IXUK7_leg	217	Yes	I	2	0	0
676	Mcal_676	G232G8W04IY5UJ_leg	309	Yes	I	1	0	0
677	Mcal_677	G232G8W04IY6JG_leg	233	Yes	I	1	0	0
678	Mcal_678	G232G8W04IYIGU_leg	466	Yes	I	3	0	0
679	Mcal_679	G232G8W04IYIW9_leg	391	Yes	I	1	0	0
680	Mcal_680	G232G8W04IYMD9_leg	469	Yes	I	2	0	0
681	Mcal_681	G232G8W04IYPRS_leg	309	Yes	I	1	0	0
682	Mcal_682	G232G8W04IYSYY_leg	179	Yes	I	1	0	0
683	Mcal_683	G232G8W04IYURH_leg	309	Yes	I	1	0	0
684	Mcal_684	G232G8W04IYVNX_leg	315	Yes	I	1	0	0
685	Mcal_685	G232G8W04IYXXJ_leg	315	Yes	I	1	0	0
686	Mcal_686	G232G8W04IYZG3_leg	256	Yes	I	2	0	0
687	Mcal_687	G232G8W04IZ0T4_leg	419	Yes	I	1	0	0
688	Mcal_688	G232G8W04IZ351_leg	474	Yes	I	1	0	0
689	Mcal_689	G232G8W04IZ3PZ_leg	100	Yes	I	1	0	0
690	Mcal_690	G232G8W04IZ7Q6_leg	232	Yes	I	1	0	0
691	Mcal_691	G232G8W04IZ8HJ_leg	310	Yes	I	1	0	0
692	Mcal_692	G232G8W04IZ90H_leg	130	Yes	I	1	0	0
693	Mcal_693	G232G8W04IZ9QP_leg	350	Yes	I	1	0	0
694	Mcal_694	G232G8W04IZAE6_leg	275	Yes	I	1	0	0
695	Mcal_695	G232G8W04IZBVN_leg	307	Yes	I	1	0	0
696	Mcal_696	G232G8W04IZDPM_leg	243	Yes	I	1	0	0
697	Mcal_697	G232G8W04IZO3U_leg	200	Yes	I	1	0	0
698	Mcal_698	G232G8W04IZOMI_leg	115	Yes	I	1	0	0
699	Mcal_699	G232G8W04IZTKF_leg	377	Yes	I	1	0	0
700	Mcal_700	G232G8W04IZW0L_leg	215	Yes	I	1	0	0
701	Mcal_701	G232G8W04IZWK6_leg	168	Yes	I	1	0	0
702	Mcal_702	G232G8W04IZX8U_leg	380	Yes	I	1	0	0
703	Mcal_703	G232G8W04IZYJ4_leg	363	Yes	I	1	0	0
704	Mcal_704	G232G8W04J0C6V_leg	318	Yes	I	1	0	0
705	Mcal_705	G232G8W04J1AIV_leg	413	Yes	I	1	0	0
706	Mcal_706	G232G8W04J1PYN_leg	156	Yes	I	1	0	0
707	Mcal_707	G232G8W04JA2O1_leg	427	Yes	I	1	0	0
708	Mcal_708	G232G8W04JA3C3_leg	267	Yes	I	1	0	0
709	Mcal_709	G232G8W04JA8KS_leg	155	Yes	I	1	0	0
710	Mcal_710	G232G8W04JABE5_leg	240	Yes	I	1	0	0
711	Mcal_711	G232G8W04JAI8P_leg	325	Yes	I	1	0	0
712	Mcal_712	G232G8W04JAIFH_leg	286	Yes	I	1	0	0
713	Mcal_713	G232G8W04JAJGW_leg	185	Yes	I	1	0	0
714	Mcal_714	G232G8W04JB2MQ_leg	360	Yes	I	1	0	0
715	Mcal_715	G232G8W04JBJJN_leg	350	Yes	I	1	0	0
716	Mcal_716	G232G8W04JBOSD_leg	345	Yes	I	1	0	0
717	Mcal_717	G232G8W04JBSED_leg	188	Yes	I	1	0	0
718	Mcal_718	G232G8W04JBSOU_leg	423	Yes	I	1	0	0
719	Mcal_719	G232G8W04JC0TI_leg	452	Yes	I	1	0	0
720	Mcal_720	G232G8W04JC25Z_leg	353	Yes	I	1	0	0
721	Mcal_721	G232G8W04JC2TN_leg	117	Yes	I	1	0	0
722	Mcal_722	G232G8W04JC3BX_leg	362	Yes	I	1	0	0
723	Mcal_723	G232G8W04JCDZW_leg	160	Yes	I	1	0	0
724	Mcal_724	G232G8W04JCK1C_leg	360	Yes	I	1	0	0
725	Mcal_725	G232G8W04JCLGK_leg	445	Yes	I	1	0	0
726	Mcal_726	G232G8W04JCQJ4_leg	401	Yes	I	1	0	0
727	Mcal_727	G232G8W04JCWSB_leg	342	Yes	I	2	0	0
728	Mcal_728	G232G8W04JCXTX_leg	377	Yes	I	1	0	0
729	Mcal_729	G232G8W04JD11Y_leg	184	Yes	I	1	0	0
730	Mcal_730	G232G8W04JD1X1_leg	134	Yes	I	1	0	0
731	Mcal_731	G232G8W04JD3D3_leg	105	Yes	I	1	0	0
732	Mcal_732	G232G8W04JD78X_leg	350	Yes	I	1	0	0
733	Mcal_733	G232G8W04JD7HM_leg	165	Yes	I	1	0	0
734	Mcal_734	G232G8W04JD80K_leg	366	Yes	I	1	0	0
735	Mcal_735	G232G8W04JD93J_leg	368	Yes	I	1	0	0
736	Mcal_736	G232G8W04JDFEG_leg	221	Yes	I	1	0	0
737	Mcal_737	G232G8W04JDFHK_leg	235	Yes	I	1	0	0
738	Mcal_738	G232G8W04JDFQ6_leg	377	Yes	I	1	0	0
739	Mcal_739	G232G8W04JDFYM_leg	373	Yes	I	1	0	0
740	Mcal_740	G232G8W04JDG5S_leg	368	Yes	I	1	0	0
741	Mcal_741	G232G8W04JDQOB_leg	394	Yes	I	1	0	0
742	Mcal_742	G232G8W04JDUYI_leg	149	Yes	I	1	0	0
743	Mcal_743	G232G8W04JE0YW_leg	250	Yes	I	1	0	0
744	Mcal_744	G232G8W04JE3Y7_leg	390	Yes	I	1	0	0
745	Mcal_745	G232G8W04JEK91_leg	323	Yes	I	1	0	0
746	Mcal_746	G232G8W04JEL0I_leg	104	Yes	I	1	0	0
747	Mcal_747	G232G8W04JELPR_leg	430	Yes	I	1	0	0
748	Mcal_748	G232G8W04JEXB0_leg	339	Yes	I	1	0	0
749	Mcal_749	G232G8W04JEXQ9_leg	127	Yes	I	1	0	0
750	Mcal_750	G232G8W04JF33A_leg	359	Yes	I	1	0	0
751	Mcal_751	G232G8W04JF3M8_leg	350	Yes	I	1	0	0
752	Mcal_752	G232G8W04JFFOL_leg	308	Yes	I	2	0	0
753	Mcal_753	G232G8W04JFSGO_leg	160	Yes	I	1	0	0
754	Mcal_754	G232G8W04JFVT8_leg	457	Yes	I	1	0	0
755	Mcal_755	G232G8W04JG2PI_leg	264	Yes	I	1	0	0
756	Mcal_756	G232G8W04JG5YE_leg	280	Yes	I	1	0	0
757	Mcal_757	G232G8W04JG7DA_leg	240	Yes	I	1	0	0
758	Mcal_758	G232G8W04JGBVE_leg	292	Yes	I	1	0	0
759	Mcal_759	G232G8W04JGKP9_leg	221	Yes	I	1	0	0
760	Mcal_760	G232G8W04JGMN3_leg	179	Yes	I	1	0	0
761	Mcal_761	G232G8W04JGTQJ_leg	171	Yes	I	1	0	0
762	Mcal_762	G232G8W04JGUZA_leg	161	Yes	I	1	0	0
763	Mcal_763	G232G8W04JH21K_leg	356	Yes	I	1	0	0
764	Mcal_764	G232G8W04JHOM4_leg	200	Yes	I	1	0	0
765	Mcal_765	G232G8W04JHT12_leg	357	Yes	I	1	0	0
766	Mcal_766	G232G8W04JHVTW_leg	246	Yes	I	1	0	0
767	Mcal_767	G232G8W04JHW3I_leg	424	Yes	I	1	0	0
768	Mcal_768	G232G8W04JI0B1_leg	286	Yes	I	1	0	0
769	Mcal_769	G232G8W04JI15M_leg	352	Yes	I	1	0	0
770	Mcal_770	G232G8W04JI55T_leg	316	Yes	I	1	0	0
771	Mcal_771	G232G8W04JI8JR_leg	335	Yes	I	1	0	0
772	Mcal_772	G232G8W04JI9ET_leg	348	Yes	I	2	0	0
773	Mcal_773	G232G8W04JIIUU_leg	131	Yes	I	1	0	0
774	Mcal_774	G232G8W04JILKX_leg	426	Yes	I	1	0	0
775	Mcal_775	G232G8W04JISU5_leg	412	Yes	I	1	0	0
776	Mcal_776	G232G8W04JIYEN_leg	284	Yes	I	1	0	0
777	Mcal_777	G232G8W04JJ0U1_leg	267	Yes	I	1	0	0
778	Mcal_778	G232G8W04JJ9I8_leg	325	Yes	I	1	0	0
779	Mcal_779	G232G8W04JJA8J_leg	197	Yes	I	4	0	0
780	Mcal_780	G232G8W04JJH5U_leg	457	Yes	I	3	0	0
781	Mcal_781	G232G8W04JJJBL_leg	128	Yes	I	1	0	0
782	Mcal_782	G232G8W04JJMDR_leg	285	Yes	I	1	0	0
783	Mcal_783	G232G8W04JJNM3_leg	197	Yes	I	1	0	0
784	Mcal_784	G232G8W04JJQE6_leg	411	Yes	I	1	0	0
785	Mcal_785	G232G8W04JJS61_leg	102	Yes	I	1	0	0
786	Mcal_786	G232G8W04JJTFB_leg	321	Yes	I	1	0	0
787	Mcal_787	G232G8W04JJTKE_leg	415	Yes	I	2	0	0
788	Mcal_788	G232G8W04JJUHV_leg	151	Yes	I	1	0	0
789	Mcal_789	G232G8W04JK3R7_leg	429	Yes	I	1	0	0
790	Mcal_790	G232G8W04JK441_leg	264	Yes	I	1	0	0
791	Mcal_791	G232G8W04JK61W_leg	304	Yes	I	2	0	0
792	Mcal_792	G232G8W04JK7C7_leg	330	Yes	I	1	0	0
793	Mcal_793	G232G8W04JKEXH_leg	466	Yes	I	1	0	0
794	Mcal_794	G232G8W04JKFI9_leg	150	Yes	I	1	0	0
795	Mcal_795	G232G8W04JKKB7_leg	284	Yes	I	1	0	0
796	Mcal_796	G232G8W04JKNOK_leg	374	Yes	I	1	0	0
797	Mcal_797	G232G8W04JKT0I_leg	418	Yes	I	1	0	0
798	Mcal_798	G232G8W04JKZAD_leg	209	Yes	I	1	0	0
799	Mcal_799	G232G8W04JKZPS_leg	120	Yes	I	1	0	0
800	Mcal_800	G232G8W04JL055_leg	119	Yes	I	1	0	0
801	Mcal_801	G232G8W04JL1DL_leg	229	Yes	I	1	0	0
802	Mcal_802	G232G8W04JL9PY_leg	218	Yes	I	1	0	0
803	Mcal_803	G232G8W04JLFWX_leg	450	Yes	I	1	0	0
804	Mcal_804	G232G8W04JLWZ2_leg	384	Yes	I	1	0	0
805	Mcal_805	G232G8W04JM4GS_leg	297	Yes	I	1	0	0
806	Mcal_806	G232G8W04JM5HT_leg	217	Yes	I	1	0	0
807	Mcal_807	G232G8W04JM6N4_leg	401	Yes	I	1	0	0
808	Mcal_808	G232G8W04JM904_leg	374	Yes	I	1	0	0
809	Mcal_809	G232G8W04JMAKW_leg	192	Yes	I	1	0	0
810	Mcal_810	G232G8W04JMAVD_leg	270	Yes	I	1	0	0
811	Mcal_811	G232G8W04JMJYO_leg	358	Yes	I	1	0	0
812	Mcal_812	G232G8W04JMMAC_leg	369	Yes	I	2	0	0
813	Mcal_813	G232G8W04JMOKH_leg	100	Yes	I	1	0	0
814	Mcal_814	G232G8W04JMQV2_leg	368	Yes	I	1	0	0
815	Mcal_815	G232G8W04JMUCM_leg	344	Yes	I	1	0	0
816	Mcal_816	G232G8W04JMV5A_leg	269	Yes	I	1	0	0
817	Mcal_817	G232G8W04JN1Q8_leg	412	Yes	I	1	0	0
818	Mcal_818	G232G8W04JN6QD_leg	292	Yes	I	1	0	0
819	Mcal_819	G232G8W04JNA19_leg	117	Yes	I	1	0	0
820	Mcal_820	G232G8W04JNAAF_leg	336	Yes	I	1	0	0
821	Mcal_821	G232G8W04JNALL_leg	239	Yes	I	1	0	0
822	Mcal_822	G232G8W04JNDBI_leg	354	Yes	I	1	0	0
823	Mcal_823	G232G8W04JNFEF_leg	101	Yes	I	1	0	0
824	Mcal_824	G232G8W04JNSBM_leg	392	Yes	I	1	0	0
825	Mcal_825	G232G8W04JO4AX_leg	212	Yes	I	1	0	0
826	Mcal_826	G232G8W04JO6CQ_leg	245	Yes	I	1	0	0
827	Mcal_827	G232G8W04JO92R_leg	440	Yes	I	6	0	0
828	Mcal_828	G232G8W04JOC21_leg	248	Yes	I	1	0	0
829	Mcal_829	G232G8W04JOD1Y_leg	107	Yes	I	1	0	9
830	Mcal_830	G232G8W04JOU3A_leg	281	Yes	I	1	0	0
831	Mcal_831	G232G8W04JOVR7_leg	333	Yes	I	1	0	0
832	Mcal_832	G232G8W04JOZYP_leg	142	Yes	I	1	0	0
833	Mcal_833	G232G8W04JP010_leg	119	Yes	I	1	0	0
834	Mcal_834	G232G8W04JP631_leg	346	Yes	I	1	0	0
835	Mcal_835	G232G8W04JP94W_leg	305	Yes	I	1	0	0
836	Mcal_836	G232G8W04JPAUQ_leg	264	Yes	I	1	0	0
837	Mcal_837	G232G8W04JPBR3_leg	313	Yes	I	1	0	0
838	Mcal_838	G232G8W04JPKOP_leg	339	Yes	I	1	0	0
839	Mcal_839	G232G8W04JPVYB_leg	336	Yes	I	1	0	0
840	Mcal_840	G232G8W04JPWVJ_leg	261	Yes	I	1	0	0
841	Mcal_841	G232G8W04JPZ2F_leg	383	Yes	I	1	0	0
842	Mcal_842	G232G8W04JQ1H3_leg	109	Yes	I	1	0	0
843	Mcal_843	G232G8W04JQ58Y_leg	309	Yes	I	1	0	0
844	Mcal_844	G232G8W04JQ8PQ_leg	117	Yes	I	1	0	0
845	Mcal_845	G232G8W04JQJ1A_leg	331	Yes	I	1	0	0
846	Mcal_846	G232G8W04JQM5O_leg	131	Yes	I	1	0	0
847	Mcal_847	G232G8W04JQR2R_leg	281	Yes	I	1	0	0
848	Mcal_848	G232G8W04JQWF5_leg	130	Yes	I	1	0	0
849	Mcal_849	G232G8W04JR3PO_leg	127	Yes	I	1	0	0
850	Mcal_850	G232G8W04JR405_leg	245	Yes	I	1	0	0
851	Mcal_851	G232G8W04JR6J8_leg	429	Yes	I	2	0	0
852	Mcal_852	G232G8W04JR6W0_leg	171	Yes	I	1	0	0
853	Mcal_853	G232G8W04JRDQZ_leg	221	Yes	I	1	0	0
854	Mcal_854	G232G8W04JRHEQ_leg	329	Yes	I	1	0	0
855	Mcal_855	G232G8W04JRISG_leg	405	Yes	I	1	0	0
856	Mcal_856	G232G8W04JRJOX_leg	152	Yes	I	1	0	0
857	Mcal_857	G232G8W04JROGF_leg	166	Yes	I	1	0	0
858	Mcal_858	G232G8W04JRTBI_leg	358	Yes	I	1	0	0
859	Mcal_859	G232G8W04JS0IK_leg	308	Yes	I	1	0	0
860	Mcal_860	G232G8W04JS74S_leg	282	Yes	I	1	0	0
861	Mcal_861	G232G8W04JS8J4_leg	366	Yes	I	1	0	0
862	Mcal_862	G232G8W04JS9LE_leg	328	Yes	I	1	0	0
863	Mcal_863	G232G8W04JSG5S_leg	285	Yes	I	1	0	0
864	Mcal_864	G232G8W04JSG85_leg	139	Yes	I	1	0	0
865	Mcal_865	G232G8W04JSLPC_leg	147	Yes	I	1	0	0
866	Mcal_866	G232G8W04JSMUV_leg	269	Yes	I	1	0	0
867	Mcal_867	G232G8W04JSNN8_leg	110	Yes	I	1	0	0
868	Mcal_868	G232G8W04JSOMF_leg	321	Yes	I	1	0	0
869	Mcal_869	G232G8W04JSW6M_leg	308	Yes	I	1	0	0
870	Mcal_870	G232G8W04JT31T_leg	390	Yes	I	1	0	0
871	Mcal_871	G232G8W04JT3BE_leg	195	Yes	I	1	0	0
872	Mcal_872	G232G8W04JT7QV_leg	250	Yes	I	1	0	0
873	Mcal_873	G232G8W04JTCZG_leg	361	Yes	I	1	0	0
874	Mcal_874	G232G8W04JTEFF_leg	107	Yes	I	1	0	0
875	Mcal_875	G232G8W04JTH1J_leg	296	Yes	I	1	0	0
876	Mcal_876	G232G8W04JTHLS_leg	130	Yes	I	1	0	0
877	Mcal_877	G232G8W04JU997_leg	160	Yes	I	1	0	0
878	Mcal_878	G232G8W04JUCHX_leg	293	Yes	I	1	0	0
879	Mcal_879	G232G8W04JUHAH_leg	453	Yes	I	1	0	0
880	Mcal_880	G232G8W04JUL3E_leg	126	Yes	I	1	0	0
881	Mcal_881	G232G8W04JUMOU_leg	310	Yes	I	1	0	0
882	Mcal_882	G232G8W04JUY1F_leg	366	Yes	I	1	0	0
883	Mcal_883	G232G8W04JV09L_leg	366	Yes	I	1	0	0
884	Mcal_884	G232G8W04JV2QX_leg	251	Yes	I	1	0	0
885	Mcal_885	G232G8W04JV559_leg	212	Yes	I	1	0	0
886	Mcal_886	G232G8W04JV6ED_leg	146	Yes	I	1	0	0
887	Mcal_887	G232G8W04JVL3A_leg	408	Yes	I	3	0	0
888	Mcal_888	G232G8W04JVP4U_leg	318	Yes	I	1	0	0
889	Mcal_889	G232G8W04JVSFU_leg	214	Yes	I	1	0	0
890	Mcal_890	G232G8W04JWBO5_leg	466	Yes	I	1	0	0
891	Mcal_891	G232G8W04JWIRR_leg	234	Yes	I	1	0	0
892	Mcal_892	G232G8W04JWSIN_leg	349	Yes	I	1	0	0
893	Mcal_893	G232G8W04JWT90_leg	256	Yes	I	1	0	0
894	Mcal_894	G232G8W04JWVJR_leg	136	Yes	I	1	0	0
895	Mcal_895	G232G8W04JX0LQ_leg	462	Yes	I	1	0	0
896	Mcal_896	G232G8W04JX3KJ_leg	474	Yes	I	1	0	0
897	Mcal_897	G232G8W04JX6XD_leg	304	Yes	I	1	0	0
898	Mcal_898	G232G8W04JX9K4_leg	388	Yes	I	1	0	0
899	Mcal_899	G232G8W04JXHER_leg	499	Yes	I	2	0	0
900	Mcal_900	G232G8W04JXM01_leg	352	Yes	I	1	0	0
901	Mcal_901	G232G8W04JXNS2_leg	332	Yes	I	1	0	0
902	Mcal_902	G232G8W04JXTZ6_leg	121	Yes	I	1	0	0
903	Mcal_903	G232G8W04JY5ER_leg	231	Yes	I	1	0	0
904	Mcal_904	G232G8W04JY7NP_leg	156	Yes	I	1	0	0
905	Mcal_905	G232G8W04JYH4Z_leg	274	Yes	I	1	0	0
906	Mcal_906	G232G8W04JYKRC_leg	179	Yes	I	1	0	0
907	Mcal_907	G232G8W04JYLJF_leg	161	Yes	I	1	0	0
908	Mcal_908	G232G8W04JYQWZ_leg	398	Yes	I	1	0	0
909	Mcal_909	G232G8W04JZ87B_leg	109	Yes	I	1	0	0
910	Mcal_910	G232G8W04JZAVI_leg	227	Yes	I	1	0	0
911	Mcal_911	G232G8W04JZDJ2_leg	411	Yes	I	1	0	0
912	Mcal_912	G232G8W04JZEIV_leg	290	Yes	I	1	0	0
913	Mcal_913	G232G8W04JZEJL_leg	459	Yes	I	1	0	0
914	Mcal_914	G232G8W04JZGIP_leg	106	Yes	I	1	0	0
915	Mcal_915	G232G8W04JZRQ2_leg	309	Yes	I	1	0	0
916	Mcal_916	G232G8W04JZW0O_leg	201	Yes	I	1	0	0
917	Mcal_917	G232G8W04JZW78_leg	240	Yes	I	1	0	0
918	Mcal_918	G232G8W04JZWK3_leg	352	Yes	I	1	0	0
919	Mcal_919	G232G8W04JZWUD_leg	247	Yes	I	1	0	0
920	Mcal_920	contig00083	586	No	I	6	0	0
921	Mcal_921	isotig00162	1135	No	I	5	0	0
922	Mcal_922	isotig00227	1008	No	I	5	0	0
923	Mcal_923	isotig00236	457	No	I	8	0	0
924	Mcal_924	isotig00254	984	No	I	34	0	0
925	Mcal_925	isotig00281	604	No	I	3	0	0
926	Mcal_926	isotig00334	806	No	I	14	0	0
927	Mcal_927	isotig00379	464	No	I	3	0	0
928	Mcal_928	isotig00402	456	No	I	4	0	0
929	Mcal_929	isotig00403	410	No	I	2	0	0
930	Mcal_930	isotig00428	1160	No	I	5	0	0
931	Mcal_931	isotig00429	1058	No	I	3	0	0
932	Mcal_932	isotig00449	959	No	I	1	0	0
933	Mcal_933	isotig00489	553	No	I	3	0	0
934	Mcal_934	isotig00495	535	No	I	1	0	0
935	Mcal_935	isotig00499	482	No	I	10	0	0
936	Mcal_936	isotig00515	579	No	I	1	0	0
937	Mcal_937	isotig00539	457	No	I	5	0	0
938	Mcal_938	isotig00561	395	No	I	3	0	0
939	Mcal_939	isotig00569	366	No	I	2	0	0
940	Mcal_940	isotig00574	477	No	I	3	0	0
941	Mcal_941	isotig00580	421	No	I	2	0	0
942	Mcal_942	isotig00588	400	No	I	2	0	0
943	Mcal_943	isotig00659	1253	No	I	41	0	0
944	Mcal_944	isotig00669	1176	No	I	10	0	0
945	Mcal_945	isotig00682	1122	No	I	24	0	0
946	Mcal_946	isotig00684	1114	No	I	82	0	0
947	Mcal_947	isotig00705	1029	No	I	16	0	0
948	Mcal_948	isotig00709	1021	No	I	123	0	0
949	Mcal_949	isotig00719	971	No	I	9	0	0
950	Mcal_950	isotig00780	878	No	I	14	0	0
951	Mcal_951	isotig00784	869	No	I	18	0	0
952	Mcal_952	isotig00785	866	No	I	9	0	0
953	Mcal_953	isotig00787	862	No	I	4	0	0
954	Mcal_954	isotig00791	861	No	I	4	0	0
955	Mcal_955	isotig00798	856	No	I	7	0	0
956	Mcal_956	isotig00862	783	No	I	7	0	0
957	Mcal_957	isotig00872	770	No	I	9	0	0
958	Mcal_958	isotig00879	762	No	I	2	0	0
959	Mcal_959	isotig00893	748	No	I	10	0	0
960	Mcal_960	isotig00897	741	No	I	5	0	0
961	Mcal_961	isotig00917	727	No	I	2	0	0
962	Mcal_962	isotig00944	699	No	I	3	0	0
963	Mcal_963	isotig00958	697	No	I	3	0	0
964	Mcal_964	isotig00964	687	No	I	4	0	0
965	Mcal_965	isotig00975	684	No	I	3	0	0
966	Mcal_966	isotig00993	677	No	I	5	0	0
967	Mcal_967	isotig01034	657	No	I	5	0	0
968	Mcal_968	isotig01042	648	No	I	7	0	0
969	Mcal_969	isotig01053	644	No	I	2	0	0
970	Mcal_970	isotig01058	639	No	I	3	0	0
971	Mcal_971	isotig01075	637	No	I	3	0	0
972	Mcal_972	isotig01079	635	No	I	4	0	0
973	Mcal_973	isotig01094	623	No	I	2	0	1
974	Mcal_974	isotig01126	611	No	I	3	0	0
975	Mcal_975	isotig01165	593	No	I	3	0	0
976	Mcal_976	isotig01181	587	No	I	6	0	0
977	Mcal_977	isotig01191	585	No	I	3	0	0
978	Mcal_978	isotig01202	578	No	I	4	0	0
979	Mcal_979	isotig01225	575	No	I	3	0	0
980	Mcal_980	isotig01233	568	No	I	8	0	0
981	Mcal_981	isotig01238	568	No	I	4	0	0
982	Mcal_982	isotig01245	563	No	I	3	0	0
983	Mcal_983	isotig01288	545	No	I	3	0	0
984	Mcal_984	isotig01314	534	No	I	2	0	0
985	Mcal_985	isotig01333	532	No	I	3	0	0
986	Mcal_986	isotig01341	534	No	I	8	0	0
987	Mcal_987	isotig01343	535	No	I	4	0	0
988	Mcal_988	isotig01345	531	No	I	4	0	0
989	Mcal_989	isotig01347	532	No	I	6	0	0
990	Mcal_990	isotig01353	525	No	I	3	0	0
991	Mcal_991	isotig01362	530	No	I	3	0	0
992	Mcal_992	isotig01367	525	No	I	3	0	0
993	Mcal_993	isotig01369	525	No	I	2	0	0
994	Mcal_994	isotig01374	523	No	I	4	0	0
995	Mcal_995	isotig01376	525	No	I	5	0	0
996	Mcal_996	isotig01402	519	No	I	3	0	0
997	Mcal_997	isotig01409	518	No	I	4	0	0
998	Mcal_998	isotig01412	518	No	I	4	0	0
999	Mcal_999	isotig01417	514	No	I	3	0	0
1000	Mcal_1000	isotig01418	515	No	I	2	0	0
1001	Mcal_1001	isotig01445	508	No	I	7	0	0
1002	Mcal_1002	isotig01453	507	No	I	2	0	0
1003	Mcal_1003	isotig01456	506	No	I	3	0	0
1004	Mcal_1004	isotig01459	506	No	I	4	0	0
1005	Mcal_1005	isotig01480	501	No	I	4	0	0
1006	Mcal_1006	isotig01484	502	No	I	3	0	0
1007	Mcal_1007	isotig01493	499	No	I	2	0	0
1008	Mcal_1008	isotig01506	498	No	I	7	0	0
1009	Mcal_1009	isotig01507	497	No	I	2	0	0
1010	Mcal_1010	isotig01511	487	No	I	2	0	0
1011	Mcal_1011	isotig01528	493	No	I	6	0	0
1012	Mcal_1012	isotig01532	491	No	I	3	0	0
1013	Mcal_1013	isotig01536	492	No	I	5	0	0
1014	Mcal_1014	isotig01567	486	No	I	6	0	0
1015	Mcal_1015	isotig01589	481	No	I	4	0	0
1016	Mcal_1016	isotig01596	479	No	I	5	0	0
1017	Mcal_1017	isotig01601	480	No	I	2	0	0
1018	Mcal_1018	isotig01606	479	No	I	2	0	0
1019	Mcal_1019	isotig01656	473	No	I	2	0	0
1020	Mcal_1020	isotig01662	470	No	I	2	0	0
1021	Mcal_1021	isotig01671	471	No	I	2	0	0
1022	Mcal_1022	isotig01676	470	No	I	3	0	0
1023	Mcal_1023	isotig01678	465	No	I	3	0	0
1024	Mcal_1024	isotig01681	470	No	I	4	0	0
1025	Mcal_1025	isotig01701	465	No	I	2	0	0
1026	Mcal_1026	isotig01702	461	No	I	2	0	0
1027	Mcal_1027	isotig01715	465	No	I	2	0	0
1028	Mcal_1028	isotig01739	459	No	I	4	0	0
1029	Mcal_1029	isotig01740	461	No	I	2	0	0
1030	Mcal_1030	isotig01754	459	No	I	4	0	0
1031	Mcal_1031	isotig01765	459	No	I	8	0	0
1032	Mcal_1032	isotig01775	457	No	I	2	0	0
1033	Mcal_1033	isotig01777	455	No	I	2	0	0
1034	Mcal_1034	isotig01781	454	No	I	2	0	0
1035	Mcal_1035	isotig01782	456	No	I	2	0	0
1036	Mcal_1036	isotig01791	457	No	I	4	0	0
1037	Mcal_1037	isotig01794	453	No	I	2	0	0
1038	Mcal_1038	isotig01800	452	No	I	2	0	0
1039	Mcal_1039	isotig01821	451	No	I	3	0	0
1040	Mcal_1040	isotig01823	452	No	I	2	0	0
1041	Mcal_1041	isotig01824	449	No	I	4	0	0
1042	Mcal_1042	isotig01828	452	No	I	3	0	0
1043	Mcal_1043	isotig01834	450	No	I	3	0	0
1044	Mcal_1044	isotig01835	450	No	I	8	0	0
1045	Mcal_1045	isotig01836	448	No	I	2	0	0
1046	Mcal_1046	isotig01844	448	No	I	2	0	0
1047	Mcal_1047	isotig01845	448	No	I	8	0	0
1048	Mcal_1048	isotig01852	447	No	I	2	0	0
1049	Mcal_1049	isotig01858	445	No	I	2	0	0
1050	Mcal_1050	isotig01859	446	No	I	2	0	0
1051	Mcal_1051	isotig01861	447	No	I	4	0	0
1052	Mcal_1052	isotig01866	446	No	I	2	0	0
1053	Mcal_1053	isotig01870	443	No	I	2	0	0
1054	Mcal_1054	isotig01885	445	No	I	5	0	0
1055	Mcal_1055	isotig01886	442	No	I	2	0	0
1056	Mcal_1056	isotig01894	442	No	I	2	0	0
1057	Mcal_1057	isotig01896	442	No	I	2	0	0
1058	Mcal_1058	isotig01901	442	No	I	5	0	0
1059	Mcal_1059	isotig01906	437	No	I	2	0	0
1060	Mcal_1060	isotig01907	440	No	I	3	0	0
1061	Mcal_1061	isotig01912	442	No	I	2	0	0
1062	Mcal_1062	isotig01913	440	No	I	2	0	0
1063	Mcal_1063	isotig01914	437	No	I	2	0	0
1064	Mcal_1064	isotig01921	440	No	I	2	0	0
1065	Mcal_1065	isotig01927	437	No	I	2	0	0
1066	Mcal_1066	isotig01928	440	No	I	3	0	0
1067	Mcal_1067	isotig01933	437	No	I	2	0	0
1068	Mcal_1068	isotig01934	439	No	I	4	0	0
1069	Mcal_1069	isotig01950	439	No	I	4	0	0
1070	Mcal_1070	isotig01954	435	No	I	3	0	0
1071	Mcal_1071	isotig01965	436	No	I	2	0	0
1072	Mcal_1072	isotig01975	434	No	I	2	0	0
1073	Mcal_1073	isotig01981	436	No	I	8	0	0
1074	Mcal_1074	isotig01989	434	No	I	3	0	0
1075	Mcal_1075	isotig01992	433	No	I	6	0	0
1076	Mcal_1076	isotig01994	428	No	I	2	0	0
1077	Mcal_1077	isotig01996	429	No	I	2	0	0
1078	Mcal_1078	isotig01997	429	No	I	2	0	0
1079	Mcal_1079	isotig02000	430	No	I	2	0	0
1080	Mcal_1080	isotig02008	431	No	I	2	0	0
1081	Mcal_1081	isotig02011	430	No	I	4	0	0
1082	Mcal_1082	isotig02012	429	No	I	3	0	0
1083	Mcal_1083	isotig02014	430	No	I	2	0	0
1084	Mcal_1084	isotig02018	428	No	I	2	0	0
1085	Mcal_1085	isotig02027	428	No	I	4	0	0
1086	Mcal_1086	isotig02028	428	No	I	6	0	0
1087	Mcal_1087	isotig02038	427	No	I	3	0	0
1088	Mcal_1088	isotig02045	427	No	I	2	0	0
1089	Mcal_1089	isotig02053	423	No	I	2	0	0
1090	Mcal_1090	isotig02057	425	No	I	3	0	0
1091	Mcal_1091	isotig02060	423	No	I	2	0	0
1092	Mcal_1092	isotig02063	422	No	I	4	0	0
1093	Mcal_1093	isotig02064	425	No	I	5	0	0
1094	Mcal_1094	isotig02067	423	No	I	4	0	0
1095	Mcal_1095	isotig02074	423	No	I	3	0	0
1096	Mcal_1096	isotig02086	419	No	I	2	0	0
1097	Mcal_1097	isotig02087	420	No	I	4	0	0
1098	Mcal_1098	isotig02088	422	No	I	3	0	0
1099	Mcal_1099	isotig02090	422	No	I	2	0	0
1100	Mcal_1100	isotig02091	419	No	I	2	0	0
1101	Mcal_1101	isotig02092	420	No	I	4	0	0
1102	Mcal_1102	isotig02094	417	No	I	3	0	0
1103	Mcal_1103	isotig02100	416	No	I	2	0	0
1104	Mcal_1104	isotig02115	419	No	I	4	0	0
1105	Mcal_1105	isotig02117	419	No	I	2	0	0
1106	Mcal_1106	isotig02124	417	No	I	2	0	0
1107	Mcal_1107	isotig02129	418	No	I	2	0	0
1108	Mcal_1108	isotig02131	417	No	I	3	0	0
1109	Mcal_1109	isotig02132	411	No	I	2	0	0
1110	Mcal_1110	isotig02134	413	No	I	2	0	0
1111	Mcal_1111	isotig02136	415	No	I	3	0	0
1112	Mcal_1112	isotig02139	415	No	I	2	0	0
1113	Mcal_1113	isotig02144	413	No	I	3	0	0
1114	Mcal_1114	isotig02145	416	No	I	6	0	0
1115	Mcal_1115	isotig02154	413	No	I	3	0	0
1116	Mcal_1116	isotig02159	408	No	I	3	0	0
1117	Mcal_1117	isotig02160	408	No	I	2	0	0
1118	Mcal_1118	isotig02161	412	No	I	2	0	0
1119	Mcal_1119	isotig02169	412	No	I	3	0	0
1120	Mcal_1120	isotig02174	413	No	I	2	0	0
1121	Mcal_1121	isotig02176	410	No	I	2	0	0
1122	Mcal_1122	isotig02196	409	No	I	2	0	0
1123	Mcal_1123	isotig02197	405	No	I	2	0	0
1124	Mcal_1124	isotig02199	406	No	I	2	0	0
1125	Mcal_1125	isotig02204	408	No	I	2	0	0
1126	Mcal_1126	isotig02209	407	No	I	3	0	0
1127	Mcal_1127	isotig02210	407	No	I	2	0	0
1128	Mcal_1128	isotig02213	404	No	I	3	0	0
1129	Mcal_1129	isotig02215	406	No	I	2	0	0
1130	Mcal_1130	isotig02219	406	No	I	2	0	0
1131	Mcal_1131	isotig02232	404	No	I	2	0	0
1132	Mcal_1132	isotig02235	403	No	I	2	0	0
1133	Mcal_1133	isotig02244	403	No	I	2	0	0
1134	Mcal_1134	isotig02245	402	No	I	4	0	0
1135	Mcal_1135	isotig02248	403	No	I	3	0	0
1136	Mcal_1136	isotig02251	403	No	I	2	0	0
1137	Mcal_1137	isotig02263	402	No	I	3	0	0
1138	Mcal_1138	isotig02279	399	No	I	2	0	0
1139	Mcal_1139	isotig02281	398	No	I	3	0	0
1140	Mcal_1140	isotig02286	399	No	I	2	0	0
1141	Mcal_1141	isotig02289	400	No	I	4	0	0
1142	Mcal_1142	isotig02301	397	No	I	3	0	0
1143	Mcal_1143	isotig02305	395	No	I	2	0	0
1144	Mcal_1144	isotig02307	395	No	I	2	0	0
1145	Mcal_1145	isotig02312	398	No	I	5	0	0
1146	Mcal_1146	isotig02313	398	No	I	4	0	0
1147	Mcal_1147	isotig02314	398	No	I	4	0	0
1148	Mcal_1148	isotig02321	397	No	I	2	0	0
1149	Mcal_1149	isotig02322	389	No	I	2	0	0
1150	Mcal_1150	isotig02324	397	No	I	3	0	0
1151	Mcal_1151	isotig02326	397	No	I	3	0	0
1152	Mcal_1152	isotig02327	395	No	I	2	0	0
1153	Mcal_1153	isotig02335	396	No	I	2	0	0
1154	Mcal_1154	isotig02338	395	No	I	2	0	0
1155	Mcal_1155	isotig02346	395	No	I	2	0	0
1156	Mcal_1156	isotig02348	391	No	I	2	0	0
1157	Mcal_1157	isotig02352	395	No	I	3	0	0
1158	Mcal_1158	isotig02355	391	No	I	2	0	0
1159	Mcal_1159	isotig02360	394	No	I	3	0	0
1160	Mcal_1160	isotig02372	392	No	I	3	0	0
1161	Mcal_1161	isotig02380	392	No	I	6	0	0
1162	Mcal_1162	isotig02382	392	No	I	3	0	0
1163	Mcal_1163	isotig02383	384	No	I	2	0	0
1164	Mcal_1164	isotig02387	392	No	I	2	0	0
1165	Mcal_1165	isotig02399	390	No	I	2	0	0
1166	Mcal_1166	isotig02411	388	No	I	2	2	0
1167	Mcal_1167	isotig02413	388	No	I	4	0	0
1168	Mcal_1168	isotig02417	386	No	I	2	0	0
1169	Mcal_1169	isotig02429	388	No	I	4	0	0
1170	Mcal_1170	isotig02437	385	No	I	2	0	0
1171	Mcal_1171	isotig02439	385	No	I	4	0	0
1172	Mcal_1172	isotig02443	381	No	I	2	0	0
1173	Mcal_1173	isotig02451	382	No	I	2	0	0
1174	Mcal_1174	isotig02457	380	No	I	2	0	0
1175	Mcal_1175	isotig02458	383	No	I	2	0	0
1176	Mcal_1176	isotig02468	376	No	I	2	0	0
1177	Mcal_1177	isotig02484	380	No	I	2	0	0
1178	Mcal_1178	isotig02490	380	No	I	3	0	0
1179	Mcal_1179	isotig02491	380	No	I	3	0	0
1180	Mcal_1180	isotig02496	379	No	I	2	0	0
1181	Mcal_1181	isotig02497	377	No	I	2	0	0
1182	Mcal_1182	isotig02499	374	No	I	3	0	0
1183	Mcal_1183	isotig02515	377	No	I	3	0	0
1184	Mcal_1184	isotig02516	376	No	I	2	0	0
1185	Mcal_1185	isotig02518	375	No	I	2	0	0
1186	Mcal_1186	isotig02523	376	No	I	2	0	0
1187	Mcal_1187	isotig02530	375	No	I	2	0	0
1188	Mcal_1188	isotig02534	375	No	I	2	0	0
1189	Mcal_1189	isotig02536	373	No	I	2	0	0
1190	Mcal_1190	isotig02541	374	No	I	2	0	0
1191	Mcal_1191	isotig02544	368	No	I	2	0	0
1192	Mcal_1192	isotig02545	374	No	I	3	0	0
1193	Mcal_1193	isotig02548	375	No	I	3	0	0
1194	Mcal_1194	isotig02555	373	No	I	2	0	0
1195	Mcal_1195	isotig02560	370	No	I	2	0	0
1196	Mcal_1196	isotig02571	371	No	I	3	0	0
1197	Mcal_1197	isotig02573	371	No	I	5	0	0
1198	Mcal_1198	isotig02576	368	No	I	2	0	0
1199	Mcal_1199	isotig02580	370	No	I	2	0	1
1200	Mcal_1200	isotig02583	367	No	I	3	0	0
1201	Mcal_1201	isotig02599	367	No	I	2	0	0
1202	Mcal_1202	isotig02609	361	No	I	2	0	0
1203	Mcal_1203	isotig02611	363	No	I	2	0	0
1204	Mcal_1204	isotig02629	362	No	I	2	0	0
1205	Mcal_1205	isotig02631	364	No	I	3	0	0
1206	Mcal_1206	isotig02635	361	No	I	2	0	0
1207	Mcal_1207	isotig02637	362	No	I	2	0	0
1208	Mcal_1208	isotig02645	362	No	I	2	0	0
1209	Mcal_1209	isotig02651	362	No	I	4	0	0
1210	Mcal_1210	isotig02653	360	No	I	2	0	0
1211	Mcal_1211	isotig02654	356	No	I	2	0	0
1212	Mcal_1212	isotig02655	359	No	I	2	0	0
1213	Mcal_1213	isotig02658	361	No	I	2	0	0
1214	Mcal_1214	isotig02659	361	No	I	3	0	0
1215	Mcal_1215	isotig02663	356	No	I	2	0	0
1216	Mcal_1216	isotig02664	358	No	I	2	0	0
1217	Mcal_1217	isotig02687	353	No	I	2	0	0
1218	Mcal_1218	isotig02704	354	No	I	2	0	0
1219	Mcal_1219	isotig02709	354	No	I	2	0	0
1220	Mcal_1220	isotig02710	350	No	I	2	0	0
1221	Mcal_1221	isotig02711	354	No	I	3	0	0
1222	Mcal_1222	isotig02712	351	No	I	4	0	0
1223	Mcal_1223	isotig02715	353	No	I	2	0	0
1224	Mcal_1224	isotig02721	352	No	I	2	0	0
1225	Mcal_1225	isotig02732	348	No	I	2	0	0
1226	Mcal_1226	isotig02733	350	No	I	2	0	0
1227	Mcal_1227	isotig02736	350	No	I	4	0	0
1228	Mcal_1228	isotig02739	350	No	I	6	0	0
1229	Mcal_1229	isotig02751	346	No	I	2	0	0
1230	Mcal_1230	isotig02754	341	No	I	2	0	0
1231	Mcal_1231	isotig02757	344	No	I	2	0	0
1232	Mcal_1232	isotig02760	344	No	I	2	0	0
1233	Mcal_1233	isotig02761	344	No	I	2	0	0
1234	Mcal_1234	isotig02765	346	No	I	3	0	0
1235	Mcal_1235	isotig02767	343	No	I	2	0	0
1236	Mcal_1236	isotig02775	343	No	I	2	0	0
1237	Mcal_1237	isotig02776	345	No	I	3	0	0
1238	Mcal_1238	isotig02780	344	No	I	3	0	0
1239	Mcal_1239	isotig02782	342	No	I	2	0	0
1240	Mcal_1240	isotig02783	344	No	I	7	0	0
1241	Mcal_1241	isotig02785	342	No	I	3	1	0
1242	Mcal_1242	isotig02787	337	No	I	2	0	0
1243	Mcal_1243	isotig02791	335	No	I	2	0	0
1244	Mcal_1244	isotig02799	341	No	I	4	1	0
1245	Mcal_1245	isotig02801	340	No	I	2	0	0
1246	Mcal_1246	isotig02803	339	No	I	2	0	0
1247	Mcal_1247	isotig02805	335	No	I	2	0	0
1248	Mcal_1248	isotig02807	337	No	I	2	0	0
1249	Mcal_1249	isotig02808	339	No	I	4	0	0
1250	Mcal_1250	isotig02830	328	No	I	2	0	0
1251	Mcal_1251	isotig02837	336	No	I	2	0	0
1252	Mcal_1252	isotig02845	334	No	I	4	2	0
1253	Mcal_1253	isotig02847	331	No	I	2	0	0
1254	Mcal_1254	isotig02849	332	No	I	2	0	0
1255	Mcal_1255	isotig02860	331	No	I	5	0	0
1256	Mcal_1256	isotig02870	330	No	I	3	0	0
1257	Mcal_1257	isotig02877	329	No	I	2	0	0
1258	Mcal_1258	isotig02884	328	No	I	4	0	0
1259	Mcal_1259	isotig02894	326	No	I	2	0	0
1260	Mcal_1260	isotig02899	323	No	I	2	0	0
1261	Mcal_1261	isotig02902	323	No	I	2	0	0
1262	Mcal_1262	isotig02910	321	No	I	2	0	0
1263	Mcal_1263	isotig02913	324	No	I	4	0	0
1264	Mcal_1264	isotig02917	323	No	I	2	0	0
1265	Mcal_1265	isotig02919	319	No	I	2	0	0
1266	Mcal_1266	isotig02924	317	No	I	2	0	0
1267	Mcal_1267	isotig02926	320	No	I	3	0	0
1268	Mcal_1268	isotig02931	317	No	I	2	0	0
1269	Mcal_1269	isotig02936	321	No	I	2	0	0
1270	Mcal_1270	isotig02946	318	No	I	2	0	0
1271	Mcal_1271	isotig02947	318	No	I	2	0	0
1272	Mcal_1272	isotig02949	319	No	I	4	0	0
1273	Mcal_1273	isotig02951	316	No	I	2	0	0
1274	Mcal_1274	isotig02964	316	No	I	2	0	0
1275	Mcal_1275	isotig02965	315	No	I	3	0	0
1276	Mcal_1276	isotig02968	313	No	I	2	0	0
1277	Mcal_1277	isotig02976	314	No	I	6	0	0
1278	Mcal_1278	isotig02978	313	No	I	2	0	0
1279	Mcal_1279	isotig02980	311	No	I	2	0	0
1280	Mcal_1280	isotig02983	311	No	I	4	0	0
1281	Mcal_1281	isotig02986	311	No	I	2	0	0
1282	Mcal_1282	isotig03000	308	No	I	3	0	0
1283	Mcal_1283	isotig03001	303	No	I	2	0	0
1284	Mcal_1284	isotig03010	305	No	I	2	0	0
1285	Mcal_1285	isotig03016	302	No	I	2	0	0
1286	Mcal_1286	isotig03027	301	No	I	13	0	0
1287	Mcal_1287	isotig03031	292	No	I	2	0	0
1288	Mcal_1288	isotig03032	301	No	I	2	0	0
1289	Mcal_1289	isotig03040	300	No	I	4	0	0
1290	Mcal_1290	isotig03048	297	No	I	2	0	0
1291	Mcal_1291	isotig03057	295	No	I	3	0	0
1292	Mcal_1292	isotig03058	295	No	I	4	0	0
1293	Mcal_1293	isotig03067	291	No	I	4	0	0
1294	Mcal_1294	isotig03069	293	No	I	1	0	0
1295	Mcal_1295	isotig03075	292	No	I	2	0	0
1296	Mcal_1296	isotig03086	288	No	I	2	0	0
1297	Mcal_1297	isotig03088	287	No	I	2	0	0
1298	Mcal_1298	isotig03094	286	No	I	2	0	0
1299	Mcal_1299	isotig03096	287	No	I	2	0	0
1300	Mcal_1300	isotig03098	286	No	I	2	0	0
1301	Mcal_1301	isotig03110	283	No	I	2	0	0
1302	Mcal_1302	isotig03112	280	No	I	2	0	0
1303	Mcal_1303	isotig03113	279	No	I	3	0	0
1304	Mcal_1304	isotig03123	276	No	I	2	0	0
1305	Mcal_1305	isotig03126	278	No	I	1	0	0
1306	Mcal_1306	isotig03134	276	No	I	2	0	0
1307	Mcal_1307	isotig03135	277	No	I	3	0	0
1308	Mcal_1308	isotig03147	272	No	I	2	0	0
1309	Mcal_1309	isotig03154	269	No	I	3	0	0
1310	Mcal_1310	isotig03156	267	No	I	2	0	0
1311	Mcal_1311	isotig03160	265	No	I	2	0	0
1312	Mcal_1312	isotig03162	264	No	I	2	0	0
1313	Mcal_1313	isotig03167	265	No	I	5	0	0
1314	Mcal_1314	isotig03168	265	No	I	2	0	0
1315	Mcal_1315	isotig03191	258	No	I	2	0	0
1316	Mcal_1316	isotig03193	255	No	I	4	0	0
1317	Mcal_1317	isotig03195	255	No	I	2	0	0
1318	Mcal_1318	isotig03196	255	No	I	8	0	0
1319	Mcal_1319	isotig03199	253	No	I	2	0	0
1320	Mcal_1320	isotig03205	244	No	I	2	0	0
1321	Mcal_1321	isotig03211	247	No	I	2	0	0
1322	Mcal_1322	isotig03221	246	No	I	3	0	0
1323	Mcal_1323	isotig03230	239	No	I	2	0	0
1324	Mcal_1324	isotig03247	237	No	I	2	0	0
1325	Mcal_1325	isotig03257	231	No	I	4	0	0
1326	Mcal_1326	isotig03259	221	No	I	2	0	0
1327	Mcal_1327	isotig03270	226	No	I	2	0	0
1328	Mcal_1328	isotig03272	226	No	I	3	0	0
1329	Mcal_1329	isotig03278	225	No	I	2	0	0
1330	Mcal_1330	isotig03282	223	No	I	2	0	0
1331	Mcal_1331	isotig03284	222	No	I	5	0	0
1332	Mcal_1332	isotig03292	214	No	I	2	0	0
1333	Mcal_1333	isotig03296	217	No	I	4	0	0
1334	Mcal_1334	isotig03316	209	No	I	2	0	0
1335	Mcal_1335	isotig03325	201	No	I	2	0	0
1336	Mcal_1336	isotig03329	202	No	I	3	0	0
1337	Mcal_1337	isotig03334	199	No	I	2	0	0
1338	Mcal_1338	isotig03345	188	No	I	2	0	0
1339	Mcal_1339	isotig03367	187	No	I	2	0	0
1340	Mcal_1340	isotig03370	188	No	I	2	0	0
1341	Mcal_1341	isotig03371	189	No	I	6	0	0
1342	Mcal_1342	isotig03373	188	No	I	1	0	0
1343	Mcal_1343	isotig03383	187	No	I	3	0	0
1344	Mcal_1344	isotig03386	186	No	I	2	0	0
1345	Mcal_1345	isotig03387	183	No	I	2	0	0
1346	Mcal_1346	isotig03388	184	No	I	2	0	0
1347	Mcal_1347	isotig03389	178	No	I	2	0	0
1348	Mcal_1348	isotig03402	178	No	I	2	0	0
1349	Mcal_1349	isotig03420	170	No	I	3	0	0
1350	Mcal_1350	isotig03423	167	No	I	2	0	0
1351	Mcal_1351	isotig03437	162	No	I	2	0	0
1352	Mcal_1352	isotig03440	159	No	I	2	0	0
1353	Mcal_1353	isotig03450	154	No	I	2	0	0
1354	Mcal_1354	isotig03460	152	No	I	2	0	0
1355	Mcal_1355	isotig03473	147	No	I	2	0	0
1356	Mcal_1356	isotig03474	147	No	I	2	0	0
1357	Mcal_1357	isotig03493	138	No	I	2	0	0
1358	Mcal_1358	isotig03498	138	No	I	3	0	0
1359	Mcal_1359	isotig03508	136	No	I	2	0	0
1360	Mcal_1360	isotig03510	135	No	I	2	0	0
1361	Mcal_1361	isotig03518	132	No	I	2	0	0
1362	Mcal_1362	isotig03534	126	No	I	2	0	0
1363	Mcal_1363	isotig03542	124	No	I	3	0	0
1364	Mcal_1364	isotig03544	122	No	I	2	0	0
1365	Mcal_1365	isotig03546	118	No	I	2	0	0
1366	Mcal_1366	isotig03548	119	No	I	2	0	0
1367	Mcal_1367	isotig03553	117	No	I	2	0	0
1368	Mcal_1368	isotig03570	110	No	I	3	0	0
1369	Mcal_1369	isotig03571	107	No	I	2	0	0
1370	Mcal_1370	isotig03575	108	No	I	2	0	0
1371	Mcal_1371	isotig03594	104	No	I	2	0	0
1372	Mcal_1372	isotig03600	102	No	I	2	0	0
1373	Mcal_1373	Contig319.Newo100p95.cap3o60p95	510	No	V	3	0	7
1374	Mcal_1374	Contig330.Newo100p95.cap3o60p95	406	No	V	2	0	1
1375	Mcal_1375	Contig451.Newo100p95.cap3o60p95	487	No	V	1	0	2
1376	Mcal_1376	Contig48.Newo100p95.cap3o60p95	2126	No	V	1	0	3
1377	Mcal_1377	Contig591.Newo100p95.cap3o60p95	1713	No	V	1	0	1031
1378	Mcal_1378	Contig638.Newo100p95.cap3o60p95	344	No	V	1	0	1
1379	Mcal_1379	Contig653.Newo100p95.cap3o60p95	613	No	V	1	0	2
1380	Mcal_1380	Contig665.Newo100p95.cap3o60p95	262	No	V	1	0	1
1381	Mcal_1381	Contig693.Newo100p95.cap3o60p95	1114	No	V	1	0	15
1382	Mcal_1382	isotig00452	1229	No	V	3	0	76
1383	Mcal_1383	isotig00575	424	No	V	1	0	2
1384	Mcal_1384	isotig00579	362	No	V	1	0	2
1385	Mcal_1385	isotig00646	1338	No	V	5	0	66
1386	Mcal_1386	isotig00666	1198	No	V	1	0	163
1387	Mcal_1387	isotig00685	1113	No	V	1	0	8
1388	Mcal_1388	isotig00720	972	No	V	1	0	4
1389	Mcal_1389	isotig00782	863	No	V	3	0	2
1390	Mcal_1390	isotig00828	820	No	V	3	0	3
1391	Mcal_1391	isotig00901	738	No	V	1	0	6
1392	Mcal_1392	isotig00943	699	No	V	3	0	3
1393	Mcal_1393	isotig00987	680	No	V	8	0	11
1394	Mcal_1394	isotig01030	654	No	V	3	0	2
1395	Mcal_1395	isotig01032	655	No	V	4	0	1
1396	Mcal_1396	isotig01185	587	No	V	3	0	1
1397	Mcal_1397	isotig01207	577	No	V	1	0	2
1398	Mcal_1398	isotig01251	557	No	V	2	0	3
1399	Mcal_1399	isotig01275	552	No	V	11	0	1
1400	Mcal_1400	isotig01316	538	No	V	1	0	1
1401	Mcal_1401	isotig01363	530	No	V	2	0	1
1402	Mcal_1402	isotig01426	511	No	V	1	0	1
1403	Mcal_1403	isotig01448	505	No	V	2	0	2
1404	Mcal_1404	isotig01461	503	No	V	1	0	1
1405	Mcal_1405	isotig01491	501	No	V	4	0	3
1406	Mcal_1406	isotig01613	477	No	V	1	0	2
1407	Mcal_1407	isotig01644	475	No	V	1	0	1
1408	Mcal_1408	isotig01670	471	No	V	1	0	1
1409	Mcal_1409	isotig01691	468	No	V	2	0	1
1410	Mcal_1410	isotig01706	463	No	V	2	0	3
1411	Mcal_1411	isotig01714	459	No	V	2	0	1
1412	Mcal_1412	isotig01749	460	No	V	2	0	2
1413	Mcal_1413	isotig01854	447	No	V	1	0	2
1414	Mcal_1414	isotig01983	435	No	V	1	0	1
1415	Mcal_1415	isotig02061	424	No	V	3	0	2
1416	Mcal_1416	isotig02135	417	No	V	1	0	3
1417	Mcal_1417	isotig02200	410	No	V	2	0	2
1418	Mcal_1418	isotig02296	399	No	V	1	0	3
1419	Mcal_1419	isotig02350	395	No	V	1	0	2
1420	Mcal_1420	isotig02432	386	No	V	2	0	1
1421	Mcal_1421	isotig02487	380	No	V	1	0	4
1422	Mcal_1422	isotig02598	367	No	V	2	0	1
1423	Mcal_1423	isotig02618	359	No	V	1	0	1
1424	Mcal_1424	isotig02669	354	No	V	1	0	1
1425	Mcal_1425	isotig02670	359	No	V	3	0	1
1426	Mcal_1426	isotig02798	341	No	V	2	0	1
1427	Mcal_1427	isotig02852	332	No	V	2	0	3
1428	Mcal_1428	isotig03043	292	No	V	1	0	1
1429	Mcal_1429	isotig03092	288	No	V	3	0	1
1430	Mcal_1430	isotig03276	224	No	V	1	0	3
1431	Mcal_1431	isotig03408	172	No	V	3	0	1
1432	Mcal_1432	isotig03563	111	No	V	1	0	1
1433	Mcal_1433	Contig1.Newo100p95.cap3o60p95	2142	No	IV	357	621	0
1434	Mcal_1434	Contig1000.Newo100p95.cap3o60p95	719	No	IV	1	4	0
1435	Mcal_1435	Contig1001.Newo100p95.cap3o60p95	914	No	IV	1	6	0
1436	Mcal_1436	Contig1003.Newo100p95.cap3o60p95	421	No	IV	4	3	0
1437	Mcal_1437	Contig1005.Newo100p95.cap3o60p95	532	No	IV	4	2	0
1438	Mcal_1438	Contig1006.Newo100p95.cap3o60p95	1032	No	IV	111	150	0
1439	Mcal_1439	Contig1012.Newo100p95.cap3o60p95	836	No	IV	2	19	0
1440	Mcal_1440	Contig1013.Newo100p95.cap3o60p95	407	No	IV	23	32	0
1441	Mcal_1441	Contig1015.Newo100p95.cap3o60p95	652	No	IV	3	2	0
1442	Mcal_1442	Contig1017.Newo100p95.cap3o60p95	1194	No	IV	6	3	0
1443	Mcal_1443	Contig1018.Newo100p95.cap3o60p95	812	No	IV	2	3	0
1444	Mcal_1444	Contig1022.Newo100p95.cap3o60p95	357	No	IV	1	2	0
1445	Mcal_1445	Contig1023.Newo100p95.cap3o60p95	315	No	IV	1	1	0
1446	Mcal_1446	Contig1024.Newo100p95.cap3o60p95	604	No	IV	3	2	0
1447	Mcal_1447	Contig1027.Newo100p95.cap3o60p95	623	No	IV	2	2	0
1448	Mcal_1448	Contig103.Newo100p95.cap3o60p95	1180	No	IV	33	57	0
1449	Mcal_1449	Contig1033.Newo100p95.cap3o60p95	516	No	IV	1	4	0
1450	Mcal_1450	Contig1039.Newo100p95.cap3o60p95	404	No	IV	2	1	0
1451	Mcal_1451	Contig104.Newo100p95.cap3o60p95	940	No	IV	2	7	0
1452	Mcal_1452	Contig106.Newo100p95.cap3o60p95	819	No	IV	8	13	0
1453	Mcal_1453	Contig110.Newo100p95.cap3o60p95	956	No	IV	16	37	0
1454	Mcal_1454	Contig113.Newo100p95.cap3o60p95	1930	No	IV	137	113	0
1455	Mcal_1455	Contig117.Newo100p95.cap3o60p95	1374	No	IV	7	31	0
1456	Mcal_1456	Contig119.Newo100p95.cap3o60p95	1099	No	IV	11	15	0
1457	Mcal_1457	Contig122.Newo100p95.cap3o60p95	1321	No	IV	637	150	0
1458	Mcal_1458	Contig123.Newo100p95.cap3o60p95	1104	No	IV	187	132	0
1459	Mcal_1459	Contig124.Newo100p95.cap3o60p95	1962	No	IV	16	34	0
1460	Mcal_1460	Contig126.Newo100p95.cap3o60p95	759	No	IV	295	161	0
1461	Mcal_1461	Contig127.Newo100p95.cap3o60p95	812	No	IV	3	1	0
1462	Mcal_1462	Contig128.Newo100p95.cap3o60p95	1716	No	IV	59	166	0
1463	Mcal_1463	Contig129.Newo100p95.cap3o60p95	1038	No	IV	4	27	0
1464	Mcal_1464	Contig130.Newo100p95.cap3o60p95	3029	No	IV	217	503	0
1465	Mcal_1465	Contig131.Newo100p95.cap3o60p95	792	No	IV	3	2	0
1466	Mcal_1466	Contig132.Newo100p95.cap3o60p95	696	No	IV	2	2	0
1467	Mcal_1467	Contig135.Newo100p95.cap3o60p95	609	No	IV	3	2	0
1468	Mcal_1468	Contig137.Newo100p95.cap3o60p95	1048	No	IV	273	136	0
1469	Mcal_1469	Contig138.Newo100p95.cap3o60p95	368	No	IV	17	17	0
1470	Mcal_1470	Contig139.Newo100p95.cap3o60p95	1489	No	IV	5	6	0
1471	Mcal_1471	Contig142.Newo100p95.cap3o60p95	3053	No	IV	73	37	0
1472	Mcal_1472	Contig143.Newo100p95.cap3o60p95	1693	No	IV	34	121	0
1473	Mcal_1473	Contig149.Newo100p95.cap3o60p95	1448	No	IV	74	67	0
1474	Mcal_1474	Contig150.Newo100p95.cap3o60p95	1336	No	IV	28	19	0
1475	Mcal_1475	Contig157.Newo100p95.cap3o60p95	1022	No	IV	9	14	0
1476	Mcal_1476	Contig158.Newo100p95.cap3o60p95	1190	No	IV	2	9	0
1477	Mcal_1477	Contig159.Newo100p95.cap3o60p95	1318	No	IV	10	18	0
1478	Mcal_1478	Contig160.Newo100p95.cap3o60p95	1409	No	IV	8	13	0
1479	Mcal_1479	Contig161.Newo100p95.cap3o60p95	1111	No	IV	5	12	0
1480	Mcal_1480	Contig162.Newo100p95.cap3o60p95	903	No	IV	29	46	0
1481	Mcal_1481	Contig164.Newo100p95.cap3o60p95	878	No	IV	9	28	0
1482	Mcal_1482	Contig165.Newo100p95.cap3o60p95	1080	No	IV	6	11	0
1483	Mcal_1483	Contig171.Newo100p95.cap3o60p95	1078	No	IV	6	3	0
1484	Mcal_1484	Contig176.Newo100p95.cap3o60p95	1195	No	IV	15	21	0
1485	Mcal_1485	Contig177.Newo100p95.cap3o60p95	1032	No	IV	42	140	0
1486	Mcal_1486	Contig183.Newo100p95.cap3o60p95	1315	No	IV	8	10	0
1487	Mcal_1487	Contig185.Newo100p95.cap3o60p95	807	No	IV	8	8	0
1488	Mcal_1488	Contig186.Newo100p95.cap3o60p95	889	No	IV	18	90	0
1489	Mcal_1489	Contig187.Newo100p95.cap3o60p95	661	No	IV	53	157	0
1490	Mcal_1490	Contig188.Newo100p95.cap3o60p95	1048	No	IV	8	6	0
1491	Mcal_1491	Contig190.Newo100p95.cap3o60p95	658	No	IV	31	91	0
1492	Mcal_1492	Contig193.Newo100p95.cap3o60p95	634	No	IV	7	7	0
1493	Mcal_1493	Contig196.Newo100p95.cap3o60p95	819	No	IV	15	8	0
1494	Mcal_1494	Contig197.Newo100p95.cap3o60p95	669	No	IV	7	3	0
1495	Mcal_1495	Contig198.Newo100p95.cap3o60p95	1736	No	IV	1	10	0
1496	Mcal_1496	Contig204.Newo100p95.cap3o60p95	603	No	IV	6	3	0
1497	Mcal_1497	Contig206.Newo100p95.cap3o60p95	623	No	IV	5	9	0
1498	Mcal_1498	Contig207.Newo100p95.cap3o60p95	1111	No	IV	28	39	0
1499	Mcal_1499	Contig208.Newo100p95.cap3o60p95	587	No	IV	2	2	0
1500	Mcal_1500	Contig210.Newo100p95.cap3o60p95	571	No	IV	2	3	0
1501	Mcal_1501	Contig212.Newo100p95.cap3o60p95	799	No	IV	2	2	0
1502	Mcal_1502	Contig215.Newo100p95.cap3o60p95	668	No	IV	6	9	0
1503	Mcal_1503	Contig217.Newo100p95.cap3o60p95	764	No	IV	4	12	0
1504	Mcal_1504	Contig220.Newo100p95.cap3o60p95	1390	No	IV	10	16	0
1505	Mcal_1505	Contig221.Newo100p95.cap3o60p95	1366	No	IV	2	8	0
1506	Mcal_1506	Contig226.Newo100p95.cap3o60p95	828	No	IV	17	31	0
1507	Mcal_1507	Contig228.Newo100p95.cap3o60p95	868	No	IV	7	11	0
1508	Mcal_1508	Contig229.Newo100p95.cap3o60p95	774	No	IV	6	9	0
1509	Mcal_1509	Contig230.Newo100p95.cap3o60p95	636	No	IV	5	4	0
1510	Mcal_1510	Contig231.Newo100p95.cap3o60p95	969	No	IV	16	8	0
1511	Mcal_1511	Contig232.Newo100p95.cap3o60p95	503	No	IV	10	5	0
1512	Mcal_1512	Contig233.Newo100p95.cap3o60p95	871	No	IV	4	17	0
1513	Mcal_1513	Contig234.Newo100p95.cap3o60p95	878	No	IV	3	26	0
1514	Mcal_1514	Contig235.Newo100p95.cap3o60p95	598	No	IV	1	9	0
1515	Mcal_1515	Contig236.Newo100p95.cap3o60p95	835	No	IV	3	5	0
1516	Mcal_1516	Contig237.Newo100p95.cap3o60p95	1291	No	IV	126	169	0
1517	Mcal_1517	Contig240.Newo100p95.cap3o60p95	622	No	IV	1	5	0
1518	Mcal_1518	Contig243.Newo100p95.cap3o60p95	671	No	IV	2	5	0
1519	Mcal_1519	Contig244.Newo100p95.cap3o60p95	797	No	IV	9	7	0
1520	Mcal_1520	Contig245.Newo100p95.cap3o60p95	1129	No	IV	82	108	0
1521	Mcal_1521	Contig246.Newo100p95.cap3o60p95	622	No	IV	5	3	0
1522	Mcal_1522	Contig248.Newo100p95.cap3o60p95	776	No	IV	16	21	0
1523	Mcal_1523	Contig252.Newo100p95.cap3o60p95	670	No	IV	2	5	0
1524	Mcal_1524	Contig253.Newo100p95.cap3o60p95	745	No	IV	2	4	0
1525	Mcal_1525	Contig255.Newo100p95.cap3o60p95	999	No	IV	4	10	0
1526	Mcal_1526	Contig257.Newo100p95.cap3o60p95	720	No	IV	74	109	0
1527	Mcal_1527	Contig258.Newo100p95.cap3o60p95	1296	No	IV	2	4	0
1528	Mcal_1528	Contig260.Newo100p95.cap3o60p95	933	No	IV	4	16	0
1529	Mcal_1529	Contig263.Newo100p95.cap3o60p95	585	No	IV	2	3	0
1530	Mcal_1530	Contig267.Newo100p95.cap3o60p95	838	No	IV	6	10	0
1531	Mcal_1531	Contig268.Newo100p95.cap3o60p95	612	No	IV	7	1	0
1532	Mcal_1532	Contig269.Newo100p95.cap3o60p95	904	No	IV	10	2	0
1533	Mcal_1533	Contig272.Newo100p95.cap3o60p95	630	No	IV	18	3	0
1534	Mcal_1534	Contig276.Newo100p95.cap3o60p95	661	No	IV	6	14	0
1535	Mcal_1535	Contig277.Newo100p95.cap3o60p95	761	No	IV	4	6	0
1536	Mcal_1536	Contig283.Newo100p95.cap3o60p95	843	No	IV	2	3	0
1537	Mcal_1537	Contig287.Newo100p95.cap3o60p95	373	No	IV	1	6	0
1538	Mcal_1538	Contig294.Newo100p95.cap3o60p95	378	No	IV	1	8	0
1539	Mcal_1539	Contig296.Newo100p95.cap3o60p95	666	No	IV	8	7	0
1540	Mcal_1540	Contig298.Newo100p95.cap3o60p95	608	No	IV	1	6	0
1541	Mcal_1541	Contig299.Newo100p95.cap3o60p95	1163	No	IV	1	13	0
1542	Mcal_1542	Contig3.Newo100p95.cap3o60p95	1563	No	IV	141	348	0
1543	Mcal_1543	Contig300.Newo100p95.cap3o60p95	910	No	IV	1	12	0
1544	Mcal_1544	Contig301.Newo100p95.cap3o60p95	354	No	IV	13	4	0
1545	Mcal_1545	Contig302.Newo100p95.cap3o60p95	800	No	IV	1	7	0
1546	Mcal_1546	Contig307.Newo100p95.cap3o60p95	679	No	IV	2	2	0
1547	Mcal_1547	Contig312.Newo100p95.cap3o60p95	481	No	IV	24	20	0
1548	Mcal_1548	Contig314.Newo100p95.cap3o60p95	539	No	IV	4	2	0
1549	Mcal_1549	Contig315.Newo100p95.cap3o60p95	478	No	IV	5	1	0
1550	Mcal_1550	Contig316.Newo100p95.cap3o60p95	618	No	IV	13	8	0
1551	Mcal_1551	Contig318.Newo100p95.cap3o60p95	567	No	IV	3	5	0
1552	Mcal_1552	Contig32.Newo100p95.cap3o60p95	2201	No	IV	6	19	0
1553	Mcal_1553	Contig326.Newo100p95.cap3o60p95	461	No	IV	1	1	0
1554	Mcal_1554	Contig329.Newo100p95.cap3o60p95	483	No	IV	1	2	0
1555	Mcal_1555	Contig333.Newo100p95.cap3o60p95	577	No	IV	9	7	0
1556	Mcal_1556	Contig334.Newo100p95.cap3o60p95	407	No	IV	36	9	0
1557	Mcal_1557	Contig335.Newo100p95.cap3o60p95	595	No	IV	1	4	0
1558	Mcal_1558	Contig336.Newo100p95.cap3o60p95	488	No	IV	2	2	0
1559	Mcal_1559	Contig346.Newo100p95.cap3o60p95	235	No	IV	2	3	0
1560	Mcal_1560	Contig349.Newo100p95.cap3o60p95	414	No	IV	2	1	0
1561	Mcal_1561	Contig35.Newo100p95.cap3o60p95	1526	No	IV	18	35	0
1562	Mcal_1562	Contig350.Newo100p95.cap3o60p95	834	No	IV	2	5	0
1563	Mcal_1563	Contig352.Newo100p95.cap3o60p95	1059	No	IV	12	27	0
1564	Mcal_1564	Contig357.Newo100p95.cap3o60p95	205	No	IV	4	1	0
1565	Mcal_1565	Contig362.Newo100p95.cap3o60p95	848	No	IV	5	12	0
1566	Mcal_1566	Contig365.Newo100p95.cap3o60p95	369	No	IV	1	1	0
1567	Mcal_1567	Contig369.Newo100p95.cap3o60p95	542	No	IV	2	12	0
1568	Mcal_1568	Contig370.Newo100p95.cap3o60p95	482	No	IV	284	197	0
1569	Mcal_1569	Contig371.Newo100p95.cap3o60p95	823	No	IV	12	11	0
1570	Mcal_1570	Contig373.Newo100p95.cap3o60p95	706	No	IV	2	10	0
1571	Mcal_1571	Contig374.Newo100p95.cap3o60p95	1595	No	IV	72	40	0
1572	Mcal_1572	Contig378.Newo100p95.cap3o60p95	1975	No	IV	13	30	0
1573	Mcal_1573	Contig379.Newo100p95.cap3o60p95	825	No	IV	12	10	0
1574	Mcal_1574	Contig384.Newo100p95.cap3o60p95	660	No	IV	1	2	0
1575	Mcal_1575	Contig386.Newo100p95.cap3o60p95	311	No	IV	42	28	0
1576	Mcal_1576	Contig387.Newo100p95.cap3o60p95	412	No	IV	2	1	0
1577	Mcal_1577	Contig390.Newo100p95.cap3o60p95	1067	No	IV	551	244	0
1578	Mcal_1578	Contig391.Newo100p95.cap3o60p95	664	No	IV	4	3	0
1579	Mcal_1579	Contig394.Newo100p95.cap3o60p95	368	No	IV	12	7	0
1580	Mcal_1580	Contig397.Newo100p95.cap3o60p95	756	No	IV	3	11	0
1581	Mcal_1581	Contig398.Newo100p95.cap3o60p95	758	No	IV	1	2	0
1582	Mcal_1582	Contig4.Newo100p95.cap3o60p95	2135	No	IV	21	49	0
1583	Mcal_1583	Contig400.Newo100p95.cap3o60p95	984	No	IV	7	12	0
1584	Mcal_1584	Contig401.Newo100p95.cap3o60p95	111	No	IV	5	2	0
1585	Mcal_1585	Contig402.Newo100p95.cap3o60p95	561	No	IV	14	4	0
1586	Mcal_1586	Contig406.Newo100p95.cap3o60p95	983	No	IV	18	17	0
1587	Mcal_1587	Contig408.Newo100p95.cap3o60p95	973	No	IV	241	8	0
1588	Mcal_1588	Contig409.Newo100p95.cap3o60p95	1345	No	IV	6	8	0
1589	Mcal_1589	Contig410.Newo100p95.cap3o60p95	305	No	IV	1	1	0
1590	Mcal_1590	Contig411.Newo100p95.cap3o60p95	251	No	IV	1	1	0
1591	Mcal_1591	Contig413.Newo100p95.cap3o60p95	2334	No	IV	171	44	0
1592	Mcal_1592	Contig415.Newo100p95.cap3o60p95	2905	No	IV	35	11	0
1593	Mcal_1593	Contig416.Newo100p95.cap3o60p95	534	No	IV	11	9	0
1594	Mcal_1594	Contig421.Newo100p95.cap3o60p95	560	No	IV	2	9	0
1595	Mcal_1595	Contig426.Newo100p95.cap3o60p95	689	No	IV	41	75	0
1596	Mcal_1596	Contig431.Newo100p95.cap3o60p95	661	No	IV	2	3	0
1597	Mcal_1597	Contig432.Newo100p95.cap3o60p95	534	No	IV	1	3	0
1598	Mcal_1598	Contig434.Newo100p95.cap3o60p95	867	No	IV	22	2	0
1599	Mcal_1599	Contig436.Newo100p95.cap3o60p95	360	No	IV	1	1	0
1600	Mcal_1600	Contig437.Newo100p95.cap3o60p95	427	No	IV	5	2	0
1601	Mcal_1601	Contig439.Newo100p95.cap3o60p95	987	No	IV	23	4	0
1602	Mcal_1602	Contig442.Newo100p95.cap3o60p95	256	No	IV	1	5	0
1603	Mcal_1603	Contig443.Newo100p95.cap3o60p95	367	No	IV	10	1	0
1604	Mcal_1604	Contig444.Newo100p95.cap3o60p95	363	No	IV	2	4	0
1605	Mcal_1605	Contig445.Newo100p95.cap3o60p95	391	No	IV	2	2	0
1606	Mcal_1606	Contig446.Newo100p95.cap3o60p95	562	No	IV	3	1	0
1607	Mcal_1607	Contig448.Newo100p95.cap3o60p95	633	No	IV	1	3	0
1608	Mcal_1608	Contig449.Newo100p95.cap3o60p95	812	No	IV	149	39	0
1609	Mcal_1609	Contig450.Newo100p95.cap3o60p95	843	No	IV	9	6	0
1610	Mcal_1610	Contig452.Newo100p95.cap3o60p95	729	No	IV	4	2	0
1611	Mcal_1611	Contig453.Newo100p95.cap3o60p95	869	No	IV	42	29	0
1612	Mcal_1612	Contig454.Newo100p95.cap3o60p95	1264	No	IV	84	13	0
1613	Mcal_1613	Contig459.Newo100p95.cap3o60p95	579	No	IV	2	3	0
1614	Mcal_1614	Contig460.Newo100p95.cap3o60p95	486	No	IV	7	7	0
1615	Mcal_1615	Contig462.Newo100p95.cap3o60p95	551	No	IV	1	2	0
1616	Mcal_1616	Contig463.Newo100p95.cap3o60p95	647	No	IV	6	1	0
1617	Mcal_1617	Contig464.Newo100p95.cap3o60p95	589	No	IV	1	3	0
1618	Mcal_1618	Contig467.Newo100p95.cap3o60p95	813	No	IV	2	2	0
1619	Mcal_1619	Contig469.Newo100p95.cap3o60p95	619	No	IV	2	7	0
1620	Mcal_1620	Contig470.Newo100p95.cap3o60p95	433	No	IV	5	4	0
1621	Mcal_1621	Contig474.Newo100p95.cap3o60p95	733	No	IV	4	1	0
1622	Mcal_1622	Contig476.Newo100p95.cap3o60p95	398	No	IV	1	1	0
1623	Mcal_1623	Contig478.Newo100p95.cap3o60p95	441	No	IV	24	16	0
1624	Mcal_1624	Contig480.Newo100p95.cap3o60p95	1037	No	IV	6	12	0
1625	Mcal_1625	Contig483.Newo100p95.cap3o60p95	113	No	IV	1	1	0
1626	Mcal_1626	Contig485.Newo100p95.cap3o60p95	637	No	IV	4	9	0
1627	Mcal_1627	Contig487.Newo100p95.cap3o60p95	426	No	IV	1	1	0
1628	Mcal_1628	Contig489.Newo100p95.cap3o60p95	321	No	IV	2	1	0
1629	Mcal_1629	Contig490.Newo100p95.cap3o60p95	583	No	IV	2	2	0
1630	Mcal_1630	Contig491.Newo100p95.cap3o60p95	383	No	IV	2	3	0
1631	Mcal_1631	Contig494.Newo100p95.cap3o60p95	588	No	IV	2	2	0
1632	Mcal_1632	Contig497.Newo100p95.cap3o60p95	455	No	IV	3	4	0
1633	Mcal_1633	Contig498.Newo100p95.cap3o60p95	564	No	IV	30	11	0
1634	Mcal_1634	Contig5.Newo100p95.cap3o60p95	1308	No	IV	13	16	0
1635	Mcal_1635	Contig500.Newo100p95.cap3o60p95	327	No	IV	6	7	0
1636	Mcal_1636	Contig501.Newo100p95.cap3o60p95	1104	No	IV	2	4	0
1637	Mcal_1637	Contig503.Newo100p95.cap3o60p95	287	No	IV	68	19	0
1638	Mcal_1638	Contig506.Newo100p95.cap3o60p95	669	No	IV	1	2	0
1639	Mcal_1639	Contig507.Newo100p95.cap3o60p95	843	No	IV	5	2	0
1640	Mcal_1640	Contig510.Newo100p95.cap3o60p95	822	No	IV	1	4	0
1641	Mcal_1641	Contig511.Newo100p95.cap3o60p95	693	No	IV	7	26	0
1642	Mcal_1642	Contig513.Newo100p95.cap3o60p95	429	No	IV	1	1	0
1643	Mcal_1643	Contig514.Newo100p95.cap3o60p95	925	No	IV	81	57	0
1644	Mcal_1644	Contig516.Newo100p95.cap3o60p95	477	No	IV	1	2	0
1645	Mcal_1645	Contig517.Newo100p95.cap3o60p95	1048	No	IV	4	17	0
1646	Mcal_1646	Contig519.Newo100p95.cap3o60p95	424	No	IV	40	21	0
1647	Mcal_1647	Contig521.Newo100p95.cap3o60p95	623	No	IV	98	36	0
1648	Mcal_1648	Contig522.Newo100p95.cap3o60p95	973	No	IV	160	123	0
1649	Mcal_1649	Contig523.Newo100p95.cap3o60p95	484	No	IV	918	131	0
1650	Mcal_1650	Contig524.Newo100p95.cap3o60p95	848	No	IV	2	7	0
1651	Mcal_1651	Contig525.Newo100p95.cap3o60p95	374	No	IV	4	2	0
1652	Mcal_1652	Contig527.Newo100p95.cap3o60p95	701	No	IV	3	9	0
1653	Mcal_1653	Contig528.Newo100p95.cap3o60p95	692	No	IV	18	11	0
1654	Mcal_1654	Contig53.Newo100p95.cap3o60p95	1852	No	IV	476	30	0
1655	Mcal_1655	Contig531.Newo100p95.cap3o60p95	935	No	IV	6	9	0
1656	Mcal_1656	Contig532.Newo100p95.cap3o60p95	2268	No	IV	75	138	0
1657	Mcal_1657	Contig533.Newo100p95.cap3o60p95	429	No	IV	1	3	0
1658	Mcal_1658	Contig534.Newo100p95.cap3o60p95	681	No	IV	32	9	0
1659	Mcal_1659	Contig535.Newo100p95.cap3o60p95	621	No	IV	57	98	0
1660	Mcal_1660	Contig537.Newo100p95.cap3o60p95	780	No	IV	20	8	0
1661	Mcal_1661	Contig538.Newo100p95.cap3o60p95	2239	No	IV	22	75	0
1662	Mcal_1662	Contig541.Newo100p95.cap3o60p95	968	No	IV	76	38	0
1663	Mcal_1663	Contig545.Newo100p95.cap3o60p95	638	No	IV	2	2	0
1664	Mcal_1664	Contig547.Newo100p95.cap3o60p95	1184	No	IV	2	3	0
1665	Mcal_1665	Contig548.Newo100p95.cap3o60p95	1340	No	IV	37	17	0
1666	Mcal_1666	Contig549.Newo100p95.cap3o60p95	696	No	IV	12	2	0
1667	Mcal_1667	Contig550.Newo100p95.cap3o60p95	1108	No	IV	2	10	0
1668	Mcal_1668	Contig552.Newo100p95.cap3o60p95	545	No	IV	3	1	0
1669	Mcal_1669	Contig553.Newo100p95.cap3o60p95	630	No	IV	1	1	0
1670	Mcal_1670	Contig554.Newo100p95.cap3o60p95	571	No	IV	1	3	0
1671	Mcal_1671	Contig556.Newo100p95.cap3o60p95	549	No	IV	1	2	0
1672	Mcal_1672	Contig60.Newo100p95.cap3o60p95	2513	No	IV	303	409	0
1673	Mcal_1673	Contig696.Newo100p95.cap3o60p95	199	No	IV	2	1	0
1674	Mcal_1674	Contig698.Newo100p95.cap3o60p95	1081	No	IV	2	34	0
1675	Mcal_1675	Contig700.Newo100p95.cap3o60p95	561	No	IV	12	24	0
1676	Mcal_1676	Contig701.Newo100p95.cap3o60p95	345	No	IV	1	2	0
1677	Mcal_1677	Contig702.Newo100p95.cap3o60p95	563	No	IV	16	21	0
1678	Mcal_1678	Contig704.Newo100p95.cap3o60p95	600	No	IV	1	4	0
1679	Mcal_1679	Contig707.Newo100p95.cap3o60p95	1886	No	IV	1488	1231	0
1680	Mcal_1680	Contig708.Newo100p95.cap3o60p95	316	No	IV	1	1	0
1681	Mcal_1681	Contig709.Newo100p95.cap3o60p95	503	No	IV	6	2	0
1682	Mcal_1682	Contig710.Newo100p95.cap3o60p95	551	No	IV	5	2	0
1683	Mcal_1683	Contig713.Newo100p95.cap3o60p95	325	No	IV	1	1	0
1684	Mcal_1684	Contig714.Newo100p95.cap3o60p95	945	No	IV	14	8	0
1685	Mcal_1685	Contig718.Newo100p95.cap3o60p95	580	No	IV	2	3	0
1686	Mcal_1686	Contig719.Newo100p95.cap3o60p95	1058	No	IV	4	7	0
1687	Mcal_1687	Contig727.Newo100p95.cap3o60p95	486	No	IV	11	35	0
1688	Mcal_1688	Contig733.Newo100p95.cap3o60p95	984	No	IV	6	5	0
1689	Mcal_1689	Contig737.Newo100p95.cap3o60p95	826	No	IV	3	7	0
1690	Mcal_1690	Contig739.Newo100p95.cap3o60p95	518	No	IV	5	6	0
1691	Mcal_1691	Contig742.Newo100p95.cap3o60p95	1698	No	IV	60	62	0
1692	Mcal_1692	Contig743.Newo100p95.cap3o60p95	417	No	IV	2	3	0
1693	Mcal_1693	Contig746.Newo100p95.cap3o60p95	398	No	IV	2	5	0
1694	Mcal_1694	Contig748.Newo100p95.cap3o60p95	511	No	IV	1	4	0
1695	Mcal_1695	Contig749.Newo100p95.cap3o60p95	725	No	IV	3	5	0
1696	Mcal_1696	Contig755.Newo100p95.cap3o60p95	700	No	IV	1	9	0
1697	Mcal_1697	Contig757.Newo100p95.cap3o60p95	434	No	IV	1	2	0
1698	Mcal_1698	Contig758.Newo100p95.cap3o60p95	398	No	IV	3	1	0
1699	Mcal_1699	Contig759.Newo100p95.cap3o60p95	766	No	IV	3	6	0
1700	Mcal_1700	Contig76.Newo100p95.cap3o60p95	1573	No	IV	7	5	0
1701	Mcal_1701	Contig761.Newo100p95.cap3o60p95	638	No	IV	6	4	0
1702	Mcal_1702	Contig763.Newo100p95.cap3o60p95	226	No	IV	1	2	0
1703	Mcal_1703	Contig766.Newo100p95.cap3o60p95	939	No	IV	9	7	0
1704	Mcal_1704	Contig772.Newo100p95.cap3o60p95	994	No	IV	6	4	0
1705	Mcal_1705	Contig775.Newo100p95.cap3o60p95	813	No	IV	30	75	0
1706	Mcal_1706	Contig779.Newo100p95.cap3o60p95	653	No	IV	29	81	0
1707	Mcal_1707	Contig780.Newo100p95.cap3o60p95	565	No	IV	1	3	0
1708	Mcal_1708	Contig789.Newo100p95.cap3o60p95	432	No	IV	2	2	0
1709	Mcal_1709	Contig79.Newo100p95.cap3o60p95	868	No	IV	7	1	0
1710	Mcal_1710	Contig790.Newo100p95.cap3o60p95	492	No	IV	1	3	0
1711	Mcal_1711	Contig791.Newo100p95.cap3o60p95	1251	No	IV	2067	1726	0
1712	Mcal_1712	Contig792.Newo100p95.cap3o60p95	660	No	IV	3	4	0
1713	Mcal_1713	Contig798.Newo100p95.cap3o60p95	1014	No	IV	505	292	0
1714	Mcal_1714	Contig799.Newo100p95.cap3o60p95	289	No	IV	2	1	0
1715	Mcal_1715	Contig800.Newo100p95.cap3o60p95	1031	No	IV	28	34	0
1716	Mcal_1716	Contig802.Newo100p95.cap3o60p95	751	No	IV	2	4	0
1717	Mcal_1717	Contig803.Newo100p95.cap3o60p95	354	No	IV	2	5	0
1718	Mcal_1718	Contig805.Newo100p95.cap3o60p95	683	No	IV	9	3	0
1719	Mcal_1719	Contig81.Newo100p95.cap3o60p95	1463	No	IV	85	100	0
1720	Mcal_1720	Contig812.Newo100p95.cap3o60p95	680	No	IV	5	6	0
1721	Mcal_1721	Contig813.Newo100p95.cap3o60p95	546	No	IV	2	1	0
1722	Mcal_1722	Contig816.Newo100p95.cap3o60p95	558	No	IV	1	1	0
1723	Mcal_1723	Contig818.Newo100p95.cap3o60p95	688	No	IV	2	9	0
1724	Mcal_1724	Contig819.Newo100p95.cap3o60p95	1490	No	IV	7	17	0
1725	Mcal_1725	Contig82.Newo100p95.cap3o60p95	1495	No	IV	654	359	0
1726	Mcal_1726	Contig822.Newo100p95.cap3o60p95	716	No	IV	4	22	0
1727	Mcal_1727	Contig823.Newo100p95.cap3o60p95	537	No	IV	1	3	0
1728	Mcal_1728	Contig824.Newo100p95.cap3o60p95	703	No	IV	14	13	0
1729	Mcal_1729	Contig826.Newo100p95.cap3o60p95	888	No	IV	135	94	0
1730	Mcal_1730	Contig828.Newo100p95.cap3o60p95	998	No	IV	2	5	0
1731	Mcal_1731	Contig829.Newo100p95.cap3o60p95	1169	No	IV	125	83	0
1732	Mcal_1732	Contig830.Newo100p95.cap3o60p95	408	No	IV	3	3	0
1733	Mcal_1733	Contig833.Newo100p95.cap3o60p95	432	No	IV	2	3	0
1734	Mcal_1734	Contig834.Newo100p95.cap3o60p95	610	No	IV	5	1	0
1735	Mcal_1735	Contig837.Newo100p95.cap3o60p95	774	No	IV	8	12	0
1736	Mcal_1736	Contig838.Newo100p95.cap3o60p95	677	No	IV	1	3	0
1737	Mcal_1737	Contig843.Newo100p95.cap3o60p95	781	No	IV	6	12	0
1738	Mcal_1738	Contig847.Newo100p95.cap3o60p95	367	No	IV	1	6	0
1739	Mcal_1739	Contig849.Newo100p95.cap3o60p95	545	No	IV	3	6	0
1740	Mcal_1740	Contig851.Newo100p95.cap3o60p95	520	No	IV	110	28	0
1741	Mcal_1741	Contig852.Newo100p95.cap3o60p95	554	No	IV	1	2	0
1742	Mcal_1742	Contig854.Newo100p95.cap3o60p95	560	No	IV	2	1	0
1743	Mcal_1743	Contig856.Newo100p95.cap3o60p95	945	No	IV	1	7	0
1744	Mcal_1744	Contig857.Newo100p95.cap3o60p95	560	No	IV	6	3	0
1745	Mcal_1745	Contig859.Newo100p95.cap3o60p95	957	No	IV	22	18	0
1746	Mcal_1746	Contig86.Newo100p95.cap3o60p95	1432	No	IV	30	22	0
1747	Mcal_1747	Contig860.Newo100p95.cap3o60p95	312	No	IV	2	1	0
1748	Mcal_1748	Contig862.Newo100p95.cap3o60p95	670	No	IV	2	4	0
1749	Mcal_1749	Contig863.Newo100p95.cap3o60p95	922	No	IV	24	60	0
1750	Mcal_1750	Contig865.Newo100p95.cap3o60p95	826	No	IV	4	7	0
1751	Mcal_1751	Contig869.Newo100p95.cap3o60p95	709	No	IV	4	3	0
1752	Mcal_1752	Contig871.Newo100p95.cap3o60p95	478	No	IV	1	3	0
1753	Mcal_1753	Contig875.Newo100p95.cap3o60p95	1619	No	IV	247	291	0
1754	Mcal_1754	Contig879.Newo100p95.cap3o60p95	540	No	IV	1	2	0
1755	Mcal_1755	Contig881.Newo100p95.cap3o60p95	673	No	IV	2	5	0
1756	Mcal_1756	Contig882.Newo100p95.cap3o60p95	535	No	IV	1	9	0
1757	Mcal_1757	Contig885.Newo100p95.cap3o60p95	967	No	IV	5	9	0
1758	Mcal_1758	Contig886.Newo100p95.cap3o60p95	549	No	IV	1	8	0
1759	Mcal_1759	Contig887.Newo100p95.cap3o60p95	367	No	IV	2	6	0
1760	Mcal_1760	Contig892.Newo100p95.cap3o60p95	582	No	IV	3	3	0
1761	Mcal_1761	Contig895.Newo100p95.cap3o60p95	535	No	IV	2	1	0
1762	Mcal_1762	Contig896.Newo100p95.cap3o60p95	444	No	IV	1	1	0
1763	Mcal_1763	Contig897.Newo100p95.cap3o60p95	814	No	IV	14	33	0
1764	Mcal_1764	Contig898.Newo100p95.cap3o60p95	1226	No	IV	109	141	0
1765	Mcal_1765	Contig901.Newo100p95.cap3o60p95	723	No	IV	1	2	0
1766	Mcal_1766	Contig902.Newo100p95.cap3o60p95	611	No	IV	6	17	0
1767	Mcal_1767	Contig908.Newo100p95.cap3o60p95	551	No	IV	1	3	0
1768	Mcal_1768	Contig910.Newo100p95.cap3o60p95	522	No	IV	2	1	0
1769	Mcal_1769	Contig913.Newo100p95.cap3o60p95	407	No	IV	1	7	0
1770	Mcal_1770	Contig914.Newo100p95.cap3o60p95	456	No	IV	31	50	0
1771	Mcal_1771	Contig92.Newo100p95.cap3o60p95	984	No	IV	2	3	0
1772	Mcal_1772	Contig920.Newo100p95.cap3o60p95	1620	No	IV	21	58	0
1773	Mcal_1773	Contig921.Newo100p95.cap3o60p95	1386	No	IV	1282	670	0
1774	Mcal_1774	Contig925.Newo100p95.cap3o60p95	315	No	IV	2	3	0
1775	Mcal_1775	Contig926.Newo100p95.cap3o60p95	293	No	IV	1	2	0
1776	Mcal_1776	Contig927.Newo100p95.cap3o60p95	594	No	IV	1	3	0
1777	Mcal_1777	Contig928.Newo100p95.cap3o60p95	766	No	IV	38	72	0
1778	Mcal_1778	Contig929.Newo100p95.cap3o60p95	1162	No	IV	21	28	0
1779	Mcal_1779	Contig93.Newo100p95.cap3o60p95	614	No	IV	4	5	0
1780	Mcal_1780	Contig930.Newo100p95.cap3o60p95	659	No	IV	43	30	0
1781	Mcal_1781	Contig931.Newo100p95.cap3o60p95	1255	No	IV	57	51	0
1782	Mcal_1782	Contig932.Newo100p95.cap3o60p95	307	No	IV	1	2	0
1783	Mcal_1783	Contig933.Newo100p95.cap3o60p95	576	No	IV	1	3	0
1784	Mcal_1784	Contig934.Newo100p95.cap3o60p95	939	No	IV	4	20	0
1785	Mcal_1785	Contig936.Newo100p95.cap3o60p95	600	No	IV	4	4	0
1786	Mcal_1786	Contig938.Newo100p95.cap3o60p95	367	No	IV	21	30	0
1787	Mcal_1787	Contig939.Newo100p95.cap3o60p95	448	No	IV	1	2	0
1788	Mcal_1788	Contig94.Newo100p95.cap3o60p95	1021	No	IV	56	43	0
1789	Mcal_1789	Contig943.Newo100p95.cap3o60p95	512	No	IV	1	3	0
1790	Mcal_1790	Contig945.Newo100p95.cap3o60p95	1011	No	IV	6	7	0
1791	Mcal_1791	Contig946.Newo100p95.cap3o60p95	616	No	IV	36	24	0
1792	Mcal_1792	Contig947.Newo100p95.cap3o60p95	497	No	IV	1	1	0
1793	Mcal_1793	Contig95.Newo100p95.cap3o60p95	1243	No	IV	26	3	0
1794	Mcal_1794	Contig954.Newo100p95.cap3o60p95	791	No	IV	79	185	0
1795	Mcal_1795	Contig963.Newo100p95.cap3o60p95	448	No	IV	7	4	0
1796	Mcal_1796	Contig969.Newo100p95.cap3o60p95	695	No	IV	3	17	0
1797	Mcal_1797	Contig97.Newo100p95.cap3o60p95	1716	No	IV	58	49	0
1798	Mcal_1798	Contig973.Newo100p95.cap3o60p95	423	No	IV	2	1	0
1799	Mcal_1799	Contig976.Newo100p95.cap3o60p95	502	No	IV	10	6	0
1800	Mcal_1800	Contig977.Newo100p95.cap3o60p95	781	No	IV	25	35	0
1801	Mcal_1801	Contig978.Newo100p95.cap3o60p95	895	No	IV	271	269	0
1802	Mcal_1802	Contig984.Newo100p95.cap3o60p95	1096	No	IV	3	7	0
1803	Mcal_1803	Contig988.Newo100p95.cap3o60p95	628	No	IV	5	4	0
1804	Mcal_1804	Contig989.Newo100p95.cap3o60p95	652	No	IV	4	1	0
1805	Mcal_1805	Contig990.Newo100p95.cap3o60p95	664	No	IV	1	2	0
1806	Mcal_1806	Contig992.Newo100p95.cap3o60p95	585	No	IV	2	5	0
1807	Mcal_1807	Contig995.Newo100p95.cap3o60p95	296	No	IV	2	1	0
1808	Mcal_1808	Contig998.Newo100p95.cap3o60p95	507	No	IV	1	2	0
1809	Mcal_1809	G232G8W04H0KPN_palp	188	Yes	IV	1	4	0
1810	Mcal_1810	G232G8W04H0M8Q_palp	364	Yes	IV	4	3	0
1811	Mcal_1811	G232G8W04H1B10_leg	334	Yes	IV	3	1	0
1812	Mcal_1812	G232G8W04H1BFE_leg	331	Yes	IV	1	2	0
1813	Mcal_1813	G232G8W04H1NRZ_palp	342	Yes	IV	1	4	0
1814	Mcal_1814	G232G8W04H1PEM_leg	330	Yes	IV	1	1	0
1815	Mcal_1815	G232G8W04H3TIX_leg	198	Yes	IV	2	1	0
1816	Mcal_1816	G232G8W04H4QL0_palp	366	Yes	IV	1	6	0
1817	Mcal_1817	G232G8W04H4UOQ_palp	175	Yes	IV	2	3	0
1818	Mcal_1818	G232G8W04H4VGB_palp	460	Yes	IV	1	5	0
1819	Mcal_1819	G232G8W04H4WVG_palp	368	Yes	IV	2	6	0
1820	Mcal_1820	G232G8W04H4YGZ_leg	355	Yes	IV	3	4	0
1821	Mcal_1821	G232G8W04H51RS_leg	295	Yes	IV	3	1	0
1822	Mcal_1822	G232G8W04H53E8_leg	217	Yes	IV	12	14	0
1823	Mcal_1823	G232G8W04H5DQO_palp	373	Yes	IV	18	11	0
1824	Mcal_1824	G232G8W04H5I75_palp	366	Yes	IV	1	4	0
1825	Mcal_1825	G232G8W04H5NS1_leg	382	Yes	IV	10	17	0
1826	Mcal_1826	G232G8W04H5SJ6_palp	435	Yes	IV	2	2	0
1827	Mcal_1827	G232G8W04H5V90_leg	415	Yes	IV	2	3	0
1828	Mcal_1828	G232G8W04H6LFQ_leg	140	Yes	IV	4	14	0
1829	Mcal_1829	G232G8W04H6V8C_leg	344	Yes	IV	2	1	0
1830	Mcal_1830	G232G8W04H7IY7_palp	308	Yes	IV	1	7	0
1831	Mcal_1831	G232G8W04H7QGR_leg	445	Yes	IV	2	1	0
1832	Mcal_1832	G232G8W04H85FY_leg	341	Yes	IV	3	1	0
1833	Mcal_1833	G232G8W04H9G9E_leg	368	Yes	IV	148	97	0
1834	Mcal_1834	G232G8W04H9M9Y_leg	313	Yes	IV	2	1	0
1835	Mcal_1835	G232G8W04H9YFQ_leg	290	Yes	IV	1	1	0
1836	Mcal_1836	G232G8W04I0ISQ_leg	348	Yes	IV	2	2	0
1837	Mcal_1837	G232G8W04I0SBQ_leg	448	Yes	IV	4	1	0
1838	Mcal_1838	G232G8W04I1T73_leg	188	Yes	IV	1	1	0
1839	Mcal_1839	G232G8W04I1Y4F_leg	140	Yes	IV	2	1	0
1840	Mcal_1840	G232G8W04I237E_palp	251	Yes	IV	1	7	0
1841	Mcal_1841	G232G8W04I2T8M_palp	370	Yes	IV	1	1	0
1842	Mcal_1842	G232G8W04I3HQ8_palp	371	Yes	IV	1	1	0
1843	Mcal_1843	G232G8W04I5DV7_palp	385	Yes	IV	1	4	0
1844	Mcal_1844	G232G8W04I5DWT_palp	414	Yes	IV	1	1	0
1845	Mcal_1845	G232G8W04I5M89_palp	234	Yes	IV	366	212	0
1846	Mcal_1846	G232G8W04I7479_palp	315	Yes	IV	1	3	0
1847	Mcal_1847	G232G8W04I7E09_palp	403	Yes	IV	8	4	0
1848	Mcal_1848	G232G8W04I7Y7V_leg	395	Yes	IV	4	3	0
1849	Mcal_1849	G232G8W04I8BSJ_leg	450	Yes	IV	5	4	0
1850	Mcal_1850	G232G8W04I9Z8J_palp	372	Yes	IV	1	8	0
1851	Mcal_1851	G232G8W04IA9DW_palp	396	Yes	IV	7	7	0
1852	Mcal_1852	G232G8W04IADGP_leg	210	Yes	IV	1	2	0
1853	Mcal_1853	G232G8W04IAKIT_palp	402	Yes	IV	7	5	0
1854	Mcal_1854	G232G8W04IB7PP_palp	382	Yes	IV	45	46	0
1855	Mcal_1855	G232G8W04IBABN_leg	381	Yes	IV	3	4	0
1856	Mcal_1856	G232G8W04IBHST_leg	361	Yes	IV	1	1	0
1857	Mcal_1857	G232G8W04IBO99_palp	280	Yes	IV	1	4	0
1858	Mcal_1858	G232G8W04IC3QG_palp	351	Yes	IV	18	5	0
1859	Mcal_1859	G232G8W04IC97V_palp	338	Yes	IV	4	1	0
1860	Mcal_1860	G232G8W04ICXZX_leg	365	Yes	IV	2	1	0
1861	Mcal_1861	G232G8W04IDF50_palp	489	Yes	IV	4	1	0
1862	Mcal_1862	G232G8W04IDV7J_palp	456	Yes	IV	1	3	0
1863	Mcal_1863	G232G8W04IENQM_palp	408	Yes	IV	7	6	0
1864	Mcal_1864	G232G8W04IEYYL_palp	446	Yes	IV	3	5	0
1865	Mcal_1865	G232G8W04IGSPF_palp	372	Yes	IV	6	6	0
1866	Mcal_1866	G232G8W04IHFK0_palp	216	Yes	IV	2	1	0
1867	Mcal_1867	G232G8W04IHHJ8_leg	333	Yes	IV	14	17	0
1868	Mcal_1868	G232G8W04II2HK_leg	336	Yes	IV	27	15	0
1869	Mcal_1869	G232G8W04IIB4H_leg	314	Yes	IV	7	2	0
1870	Mcal_1870	G232G8W04IPAQB_palp	249	Yes	IV	1	1	0
1871	Mcal_1871	G232G8W04IPJY7_palp	428	Yes	IV	1	2	0
1872	Mcal_1872	G232G8W04IQ2CG_leg	336	Yes	IV	6	14	0
1873	Mcal_1873	G232G8W04IQAW1_leg	168	Yes	IV	1	1	0
1874	Mcal_1874	G232G8W04IQYSX_leg	390	Yes	IV	5	3	0
1875	Mcal_1875	G232G8W04IR474_leg	355	Yes	IV	2	4	0
1876	Mcal_1876	G232G8W04IRBGW_palp	456	Yes	IV	17	11	0
1877	Mcal_1877	G232G8W04IRLKX_leg	297	Yes	IV	1	1	0
1878	Mcal_1878	G232G8W04IRWHT_palp	384	Yes	IV	2	2	0
1879	Mcal_1879	G232G8W04IRXCK_palp	323	Yes	IV	3	2	0
1880	Mcal_1880	G232G8W04IS5VG_palp	119	Yes	IV	5	3	0
1881	Mcal_1881	G232G8W04ISHU1_leg	437	Yes	IV	2	1	0
1882	Mcal_1882	G232G8W04IT006_leg	355	Yes	IV	2	1	0
1883	Mcal_1883	G232G8W04ITS0A_leg	455	Yes	IV	1	2	0
1884	Mcal_1884	G232G8W04IU0B0_palp	458	Yes	IV	2	3	0
1885	Mcal_1885	G232G8W04IV7PW_leg	314	Yes	IV	1	1	0
1886	Mcal_1886	G232G8W04IVTXD_leg	372	Yes	IV	32	31	0
1887	Mcal_1887	G232G8W04IW0WD_leg	116	Yes	IV	47	20	0
1888	Mcal_1888	G232G8W04IW370_leg	340	Yes	IV	1	2	0
1889	Mcal_1889	G232G8W04IWD8K_palp	465	Yes	IV	2	1	0
1890	Mcal_1890	G232G8W04IWUX6_leg	500	Yes	IV	6	2	0
1891	Mcal_1891	G232G8W04IWWME_leg	276	Yes	IV	1	1	0
1892	Mcal_1892	G232G8W04IX3YM_leg	447	Yes	IV	3	1	0
1893	Mcal_1893	G232G8W04IX8Y1_leg	370	Yes	IV	5	3	0
1894	Mcal_1894	G232G8W04IXJ5V_leg	464	Yes	IV	4	2	0
1895	Mcal_1895	G232G8W04IXU34_leg	148	Yes	IV	17	47	0
1896	Mcal_1896	G232G8W04IYCBW_palp	488	Yes	IV	1	3	0
1897	Mcal_1897	G232G8W04IYHEW_leg	346	Yes	IV	1	1	0
1898	Mcal_1898	G232G8W04IZ6HC_leg	436	Yes	IV	1	2	0
1899	Mcal_1899	G232G8W04IZP7P_leg	389	Yes	IV	5	2	0
1900	Mcal_1900	G232G8W04IZTUP_palp	452	Yes	IV	10	2	0
1901	Mcal_1901	G232G8W04J01PD_leg	291	Yes	IV	77	102	0
1902	Mcal_1902	G232G8W04JA2RW_leg	392	Yes	IV	6	3	0
1903	Mcal_1903	G232G8W04JAKOW_palp	378	Yes	IV	4	1	0
1904	Mcal_1904	G232G8W04JALH5_palp	220	Yes	IV	4	5	0
1905	Mcal_1905	G232G8W04JB8I1_leg	459	Yes	IV	1	1	0
1906	Mcal_1906	G232G8W04JC9VR_leg	274	Yes	IV	1	3	0
1907	Mcal_1907	G232G8W04JCM9I_palp	395	Yes	IV	1	7	0
1908	Mcal_1908	G232G8W04JDGL7_palp	505	Yes	IV	1	2	0
1909	Mcal_1909	G232G8W04JDJXG_leg	286	Yes	IV	3	7	0
1910	Mcal_1910	G232G8W04JEJN6_leg	379	Yes	IV	3	2	0
1911	Mcal_1911	G232G8W04JF0CH_palp	246	Yes	IV	2	4	0
1912	Mcal_1912	G232G8W04JFVNZ_leg	304	Yes	IV	1	1	0
1913	Mcal_1913	G232G8W04JGP47_leg	214	Yes	IV	9	6	0
1914	Mcal_1914	G232G8W04JHNSJ_leg	349	Yes	IV	1	4	0
1915	Mcal_1915	G232G8W04JHPBW_leg	387	Yes	IV	2	1	0
1916	Mcal_1916	G232G8W04JI88M_leg	324	Yes	IV	4	5	0
1917	Mcal_1917	G232G8W04JIM6I_palp	423	Yes	IV	1	1	0
1918	Mcal_1918	G232G8W04JINBM_palp	100	Yes	IV	3	16	0
1919	Mcal_1919	G232G8W04JKWSV_palp	452	Yes	IV	2	1	0
1920	Mcal_1920	G232G8W04JL1HD_palp	332	Yes	IV	2	2	0
1921	Mcal_1921	G232G8W04JNHA7_palp	205	Yes	IV	1	1	0
1922	Mcal_1922	G232G8W04JOLI9_leg	411	Yes	IV	1	1	0
1923	Mcal_1923	G232G8W04JPHOC_palp	437	Yes	IV	2	5	0
1924	Mcal_1924	G232G8W04JQ2QJ_leg	321	Yes	IV	1	4	0
1925	Mcal_1925	G232G8W04JRE39_leg	335	Yes	IV	1	1	0
1926	Mcal_1926	G232G8W04JRWN0_palp	141	Yes	IV	2	3	0
1927	Mcal_1927	G232G8W04JT5IZ_palp	428	Yes	IV	1	3	0
[truncated: 4,772 more rows]
[truncated: 4 more columns]

## Sheet: IR_&_NPC2 candidates
Table S3.		Summary of the IRs and NPC2 candidates
[truncated: 9 more rows]
