# Supplementary material for: Comparative analysis of tissue-specific transcriptomes in the funnel-web spider Macrothele calpeiana (Araneae, Hexathelidae)
Source: PeerJ. 2015 Jun 30;3:e1064. doi: 10.7717/peerj.1064 (PMC4493671; doi:10.7717/peerj.1064)
Supplement: Table S5 — M. calpeiana transcripts with significant HK or CEG blast hits [file peerj-03-1064-s005.xlsx]

## Sheet: Hoja1
Table S5.	Presence of Housekeeping and CEGMA genes
		HK and CEG hits
Sequence_ID	Contig_ID	Dmelano_HK_hit	Human_HK_hit	Shared_HK_hit	CEG_hit
Mcal_1	Contig227.Newo100p95.cap3o60p95	No	No	No	No
Mcal_2	Contig238.Newo100p95.cap3o60p95	No	No	No	No
Mcal_3	Contig251.Newo100p95.cap3o60p95	Yes	No	No	No
Mcal_4	Contig265.Newo100p95.cap3o60p95	No	No	No	No
Mcal_5	Contig282.Newo100p95.cap3o60p95	Yes	No	No	No
Mcal_6	Contig288.Newo100p95.cap3o60p95	No	Yes	No	No
Mcal_7	Contig289.Newo100p95.cap3o60p95	No	No	No	No
Mcal_8	Contig304.Newo100p95.cap3o60p95	No	No	No	No
Mcal_9	Contig313.Newo100p95.cap3o60p95	No	No	No	No
Mcal_10	Contig340.Newo100p95.cap3o60p95	No	No	No	No
Mcal_11	Contig353.Newo100p95.cap3o60p95	No	No	No	No
Mcal_12	Contig354.Newo100p95.cap3o60p95	No	No	No	No
Mcal_13	Contig376.Newo100p95.cap3o60p95	No	No	No	No
Mcal_14	Contig380.Newo100p95.cap3o60p95	Yes	Yes	Yes	Yes
Mcal_15	Contig382.Newo100p95.cap3o60p95	Yes	Yes	Yes	Yes
Mcal_16	Contig389.Newo100p95.cap3o60p95	Yes	Yes	Yes	Yes
Mcal_17	Contig392.Newo100p95.cap3o60p95	No	No	No	No
Mcal_18	Contig393.Newo100p95.cap3o60p95	Yes	Yes	Yes	No
Mcal_19	Contig396.Newo100p95.cap3o60p95	No	No	No	No
Mcal_20	Contig407.Newo100p95.cap3o60p95	No	No	No	No
Mcal_21	Contig412.Newo100p95.cap3o60p95	No	No	No	No
Mcal_22	Contig414.Newo100p95.cap3o60p95	No	No	No	No
Mcal_23	Contig420.Newo100p95.cap3o60p95	No	No	No	No
Mcal_24	Contig424.Newo100p95.cap3o60p95	No	No	No	No
Mcal_25	Contig427.Newo100p95.cap3o60p95	No	No	No	No
Mcal_26	Contig429.Newo100p95.cap3o60p95	Yes	Yes	Yes	No
Mcal_27	Contig430.Newo100p95.cap3o60p95	No	No	No	Yes
Mcal_28	Contig435.Newo100p95.cap3o60p95	No	No	No	No
Mcal_29	Contig438.Newo100p95.cap3o60p95	No	No	No	Yes
Mcal_30	Contig440.Newo100p95.cap3o60p95	Yes	Yes	Yes	Yes
Mcal_31	Contig455.Newo100p95.cap3o60p95	No	No	No	No
Mcal_32	Contig456.Newo100p95.cap3o60p95	No	Yes	No	No
Mcal_33	Contig458.Newo100p95.cap3o60p95	No	Yes	No	Yes
Mcal_34	Contig461.Newo100p95.cap3o60p95	No	No	No	No
Mcal_35	Contig465.Newo100p95.cap3o60p95	No	No	No	No
Mcal_36	Contig471.Newo100p95.cap3o60p95	No	No	No	No
Mcal_37	Contig475.Newo100p95.cap3o60p95	No	No	No	No
Mcal_38	Contig481.Newo100p95.cap3o60p95	No	No	No	No
Mcal_39	Contig482.Newo100p95.cap3o60p95	No	No	No	No
Mcal_40	Contig484.Newo100p95.cap3o60p95	No	Yes	No	No
Mcal_41	Contig486.Newo100p95.cap3o60p95	No	No	No	No
Mcal_42	Contig496.Newo100p95.cap3o60p95	No	No	No	No
Mcal_43	Contig499.Newo100p95.cap3o60p95	No	No	No	No
Mcal_44	Contig502.Newo100p95.cap3o60p95	No	Yes	No	Yes
Mcal_45	Contig508.Newo100p95.cap3o60p95	No	No	No	No
Mcal_46	Contig509.Newo100p95.cap3o60p95	No	No	No	No
Mcal_47	Contig512.Newo100p95.cap3o60p95	No	No	No	No
Mcal_48	Contig515.Newo100p95.cap3o60p95	Yes	Yes	Yes	Yes
Mcal_49	Contig518.Newo100p95.cap3o60p95	No	No	No	No
Mcal_50	Contig520.Newo100p95.cap3o60p95	Yes	Yes	Yes	No
Mcal_51	Contig529.Newo100p95.cap3o60p95	No	No	No	No
Mcal_52	Contig530.Newo100p95.cap3o60p95	No	No	No	No
Mcal_53	Contig536.Newo100p95.cap3o60p95	Yes	No	No	No
Mcal_54	Contig539.Newo100p95.cap3o60p95	No	No	No	No
Mcal_55	Contig542.Newo100p95.cap3o60p95	Yes	Yes	Yes	No
Mcal_56	Contig544.Newo100p95.cap3o60p95	No	No	No	No
Mcal_57	Contig555.Newo100p95.cap3o60p95	No	No	No	No
Mcal_58	Contig557.Newo100p95.cap3o60p95	No	No	No	No
Mcal_59	Contig84.Newo100p95.cap3o60p95	Yes	Yes	Yes	Yes
Mcal_60	Contig997.Newo100p95.cap3o60p95	No	No	No	No
Mcal_61	G232G8W04H03HN_leg	No	No	No	No
Mcal_62	G232G8W04H045U_leg	No	No	No	No
Mcal_63	G232G8W04H0J0K_leg	No	No	No	No
Mcal_64	G232G8W04H0JU9_leg	Yes	Yes	Yes	No
Mcal_65	G232G8W04H0QOT_leg	No	No	No	No
Mcal_66	G232G8W04H0V2L_leg	No	No	No	No
Mcal_67	G232G8W04H10EO_leg	No	No	No	No
Mcal_68	G232G8W04H16D4_leg	No	No	No	No
Mcal_69	G232G8W04H16HV_leg	No	No	No	No
Mcal_70	G232G8W04H1B2G_leg	No	No	No	No
Mcal_71	G232G8W04H1CTJ_leg	No	No	No	No
Mcal_72	G232G8W04H1FKW_leg	No	No	No	No
Mcal_73	G232G8W04H1FU2_leg	No	No	No	No
Mcal_74	G232G8W04H1HRV_leg	No	No	No	No
Mcal_75	G232G8W04H1IRO_leg	No	No	No	No
Mcal_76	G232G8W04H1N12_leg	No	Yes	No	No
Mcal_77	G232G8W04H1U28_leg	No	No	No	No
Mcal_78	G232G8W04H1XWT_leg	No	No	No	No
Mcal_79	G232G8W04H20AK_leg	No	No	No	No
Mcal_80	G232G8W04H20GB_leg	No	No	No	No
Mcal_81	G232G8W04H20JT_leg	No	No	No	No
Mcal_82	G232G8W04H27A4_leg	No	No	No	No
Mcal_83	G232G8W04H29VG_leg	No	No	No	No
Mcal_84	G232G8W04H2DO8_leg	Yes	Yes	Yes	No
Mcal_85	G232G8W04H2HSH_leg	No	No	No	No
Mcal_86	G232G8W04H2HTK_leg	No	No	No	No
Mcal_87	G232G8W04H2I02_leg	No	No	No	No
Mcal_88	G232G8W04H2JON_leg	Yes	No	No	No
Mcal_89	G232G8W04H2N15_leg	No	No	No	No
Mcal_90	G232G8W04H2OLS_leg	No	No	No	No
Mcal_91	G232G8W04H2UDL_leg	No	Yes	No	No
Mcal_92	G232G8W04H2Z2U_leg	No	No	No	No
Mcal_93	G232G8W04H33PL_leg	No	No	No	No
Mcal_94	G232G8W04H36U4_leg	No	No	No	No
Mcal_95	G232G8W04H37AG_leg	Yes	Yes	Yes	No
Mcal_96	G232G8W04H3B3G_leg	No	No	No	No
Mcal_97	G232G8W04H3C0W_leg	No	No	No	No
Mcal_98	G232G8W04H3FI9_leg	No	No	No	No
Mcal_99	G232G8W04H3UYW_leg	No	No	No	No
Mcal_100	G232G8W04H3V68_leg	No	No	No	No
Mcal_101	G232G8W04H3VXO_leg	No	No	No	No
Mcal_102	G232G8W04H41YN_leg	No	No	No	No
Mcal_103	G232G8W04H43MK_leg	No	No	No	No
Mcal_104	G232G8W04H44R2_leg	No	No	No	No
Mcal_105	G232G8W04H48VD_leg	No	No	No	No
Mcal_106	G232G8W04H49K2_leg	No	No	No	No
Mcal_107	G232G8W04H4AXR_leg	No	No	No	No
Mcal_108	G232G8W04H4BB6_leg	No	No	No	No
Mcal_109	G232G8W04H4DLJ_leg	No	No	No	No
Mcal_110	G232G8W04H4FGI_leg	No	No	No	No
Mcal_111	G232G8W04H4HB2_leg	Yes	Yes	Yes	Yes
Mcal_112	G232G8W04H4JY5_leg	No	No	No	No
Mcal_113	G232G8W04H4L5D_leg	No	No	No	No
Mcal_114	G232G8W04H4MUA_leg	No	No	No	No
Mcal_115	G232G8W04H4N5Y_leg	Yes	Yes	Yes	Yes
Mcal_116	G232G8W04H4NOG_leg	No	No	No	No
Mcal_117	G232G8W04H4QFK_leg	No	No	No	No
Mcal_118	G232G8W04H4S50_leg	No	No	No	No
Mcal_119	G232G8W04H4SIV_leg	No	No	No	No
Mcal_120	G232G8W04H4V7V_leg	No	No	No	No
Mcal_121	G232G8W04H4VNS_leg	No	No	No	No
Mcal_122	G232G8W04H51PW_leg	No	No	No	No
Mcal_123	G232G8W04H52EE_leg	No	No	No	No
Mcal_124	G232G8W04H52T6_leg	No	No	No	No
Mcal_125	G232G8W04H53IN_leg	Yes	Yes	Yes	No
Mcal_126	G232G8W04H58I1_leg	No	No	No	No
Mcal_127	G232G8W04H5AA8_leg	No	No	No	No
Mcal_128	G232G8W04H5AGH_leg	No	No	No	No
Mcal_129	G232G8W04H5BDA_leg	Yes	Yes	Yes	Yes
Mcal_130	G232G8W04H5DMB_leg	No	No	No	No
Mcal_131	G232G8W04H5F6W_leg	No	No	No	No
Mcal_132	G232G8W04H5ID0_leg	No	No	No	No
Mcal_133	G232G8W04H5JRN_leg	No	Yes	No	No
Mcal_134	G232G8W04H5KDP_leg	No	No	No	No
Mcal_135	G232G8W04H5M9P_leg	Yes	Yes	Yes	Yes
Mcal_136	G232G8W04H5MT7_leg	No	No	No	No
Mcal_137	G232G8W04H5MUO_leg	No	No	No	No
Mcal_138	G232G8W04H5NSK_leg	No	No	No	No
Mcal_139	G232G8W04H5NT4_leg	No	No	No	No
Mcal_140	G232G8W04H5QF8_leg	No	No	No	No
Mcal_141	G232G8W04H5R8E_leg	No	No	No	No
Mcal_142	G232G8W04H5VA3_leg	No	No	No	No
Mcal_143	G232G8W04H6105_leg	No	No	No	No
Mcal_144	G232G8W04H62EW_leg	Yes	Yes	Yes	No
Mcal_145	G232G8W04H62KM_leg	No	No	No	No
Mcal_146	G232G8W04H65B1_leg	No	No	No	No
Mcal_147	G232G8W04H65G0_leg	No	No	No	No
Mcal_148	G232G8W04H67P5_leg	No	No	No	No
Mcal_149	G232G8W04H67S2_leg	No	No	No	Yes
Mcal_150	G232G8W04H697O_leg	No	No	No	No
Mcal_151	G232G8W04H6BA8_leg	No	No	No	No
Mcal_152	G232G8W04H6CMK_leg	No	No	No	No
Mcal_153	G232G8W04H6DD3_leg	Yes	Yes	Yes	No
Mcal_154	G232G8W04H6F0F_leg	No	No	No	No
Mcal_155	G232G8W04H6F8D_leg	No	Yes	No	No
Mcal_156	G232G8W04H6HZG_leg	No	No	No	No
Mcal_157	G232G8W04H6I2F_leg	No	No	No	No
Mcal_158	G232G8W04H6JMP_leg	No	No	No	No
Mcal_159	G232G8W04H6O45_leg	No	No	No	No
Mcal_160	G232G8W04H6S36_leg	No	No	No	No
Mcal_161	G232G8W04H6XDI_leg	No	No	No	No
Mcal_162	G232G8W04H6XKA_leg	No	No	No	No
Mcal_163	G232G8W04H6XOJ_leg	No	No	No	No
Mcal_164	G232G8W04H6XVE_leg	No	No	No	No
Mcal_165	G232G8W04H6ZJS_leg	No	No	No	No
Mcal_166	G232G8W04H71UZ_leg	No	No	No	No
Mcal_167	G232G8W04H74M9_leg	No	No	No	No
Mcal_168	G232G8W04H7549_leg	No	Yes	No	Yes
Mcal_169	G232G8W04H75XX_leg	No	No	No	No
Mcal_170	G232G8W04H7AUX_leg	No	No	No	No
Mcal_171	G232G8W04H7BBT_leg	No	No	No	No
Mcal_172	G232G8W04H7E5J_leg	No	No	No	No
Mcal_173	G232G8W04H7IDF_leg	No	No	No	No
Mcal_174	G232G8W04H7JNY_leg	Yes	No	No	No
Mcal_175	G232G8W04H7N92_leg	No	No	No	No
Mcal_176	G232G8W04H7NLB_leg	No	No	No	No
Mcal_177	G232G8W04H7OFQ_leg	No	No	No	No
Mcal_178	G232G8W04H7TN0_leg	No	No	No	No
Mcal_179	G232G8W04H7TNY_leg	No	Yes	No	No
Mcal_180	G232G8W04H7UG6_leg	No	No	No	No
Mcal_181	G232G8W04H8055_leg	No	No	No	No
Mcal_182	G232G8W04H81MB_leg	No	No	No	No
Mcal_183	G232G8W04H823E_leg	No	No	No	No
Mcal_184	G232G8W04H829N_leg	No	No	No	No
Mcal_185	G232G8W04H8IQ7_leg	No	No	No	No
Mcal_186	G232G8W04H8MOZ_leg	No	No	No	No
Mcal_187	G232G8W04H8QAS_leg	No	No	No	No
Mcal_188	G232G8W04H8QFL_leg	No	No	No	No
Mcal_189	G232G8W04H8QH5_leg	Yes	Yes	Yes	No
Mcal_190	G232G8W04H8QRA_leg	No	No	No	No
Mcal_191	G232G8W04H8U7G_leg	Yes	Yes	Yes	No
Mcal_192	G232G8W04H94OL_leg	No	Yes	No	No
Mcal_193	G232G8W04H9619_leg	Yes	No	No	No
Mcal_194	G232G8W04H9AYZ_leg	No	No	No	No
Mcal_195	G232G8W04H9G2K_leg	No	No	No	No
Mcal_196	G232G8W04H9H4L_leg	No	No	No	No
Mcal_197	G232G8W04H9H97_leg	No	No	No	No
Mcal_198	G232G8W04H9IC4_leg	No	No	No	No
Mcal_199	G232G8W04H9IYM_leg	No	No	No	No
Mcal_200	G232G8W04H9JPI_leg	No	No	No	No
Mcal_201	G232G8W04H9JR4_leg	No	No	No	No
Mcal_202	G232G8W04H9LU6_leg	No	No	No	No
Mcal_203	G232G8W04H9OFW_leg	Yes	Yes	Yes	No
Mcal_204	G232G8W04H9U8Q_leg	No	No	No	No
Mcal_205	G232G8W04H9UDM_leg	No	No	No	No
Mcal_206	G232G8W04H9UJW_leg	No	No	No	No
Mcal_207	G232G8W04H9VH8_leg	No	No	No	No
Mcal_208	G232G8W04H9X7M_leg	No	No	No	No
Mcal_209	G232G8W04H9Z1N_leg	No	No	No	No
Mcal_210	G232G8W04I0ADF_leg	No	No	No	No
Mcal_211	G232G8W04I0E1L_leg	No	No	No	No
Mcal_212	G232G8W04I0E63_leg	No	No	No	No
Mcal_213	G232G8W04I0LPW_leg	No	Yes	No	No
Mcal_214	G232G8W04I0QDR_leg	Yes	No	No	No
Mcal_215	G232G8W04I0QKL_leg	No	No	No	No
Mcal_216	G232G8W04I0S9F_leg	No	No	No	No
Mcal_217	G232G8W04I0UWD_leg	No	No	No	No
Mcal_218	G232G8W04I0V03_leg	No	Yes	No	No
Mcal_219	G232G8W04I0W50_leg	No	No	No	No
Mcal_220	G232G8W04I0WTV_leg	No	No	No	No
Mcal_221	G232G8W04I0YU2_leg	No	No	No	No
Mcal_222	G232G8W04I11IT_leg	No	No	No	No
Mcal_223	G232G8W04I120G_leg	No	No	No	No
Mcal_224	G232G8W04I147P_leg	Yes	Yes	Yes	No
Mcal_225	G232G8W04I15CP_leg	No	No	No	No
Mcal_226	G232G8W04I16P6_leg	No	No	No	No
Mcal_227	G232G8W04I1BRN_leg	No	No	No	No
Mcal_228	G232G8W04I1FK7_leg	No	No	No	No
Mcal_229	G232G8W04I1SLO_leg	Yes	No	No	No
Mcal_230	G232G8W04I1TBC_leg	No	No	No	No
Mcal_231	G232G8W04I1W6N_leg	No	No	No	No
Mcal_232	G232G8W04I1ZJK_leg	No	No	No	No
Mcal_233	G232G8W04I22LO_leg	No	No	No	No
Mcal_234	G232G8W04I23SJ_leg	No	No	No	No
Mcal_235	G232G8W04I26O2_leg	Yes	Yes	Yes	No
Mcal_236	G232G8W04I2DLI_leg	Yes	Yes	Yes	No
Mcal_237	G232G8W04I2DTZ_leg	No	No	No	No
Mcal_238	G232G8W04I2GJD_leg	No	Yes	No	No
Mcal_239	G232G8W04I2H0I_leg	Yes	No	No	No
Mcal_240	G232G8W04I2HXU_leg	No	No	No	No
Mcal_241	G232G8W04I2HXZ_leg	No	No	No	No
Mcal_242	G232G8W04I2IPZ_leg	Yes	Yes	Yes	Yes
Mcal_243	G232G8W04I2JU0_leg	No	No	No	No
Mcal_244	G232G8W04I2K7Y_leg	No	No	No	No
Mcal_245	G232G8W04I2K8C_leg	No	No	No	No
Mcal_246	G232G8W04I301V_leg	No	No	No	No
Mcal_247	G232G8W04I31KY_leg	No	No	No	No
Mcal_248	G232G8W04I31SX_leg	Yes	Yes	Yes	Yes
Mcal_249	G232G8W04I351I_leg	No	No	No	No
Mcal_250	G232G8W04I381Q_leg	No	No	No	No
Mcal_251	G232G8W04I38JJ_leg	Yes	Yes	Yes	No
Mcal_252	G232G8W04I3A25_leg	No	No	No	No
Mcal_253	G232G8W04I3BJR_leg	No	No	No	No
Mcal_254	G232G8W04I3CMU_leg	Yes	Yes	Yes	Yes
Mcal_255	G232G8W04I3CN5_leg	No	No	No	No
Mcal_256	G232G8W04I3F9U_leg	No	No	No	No
Mcal_257	G232G8W04I3GC8_leg	No	No	No	No
Mcal_258	G232G8W04I3MAR_leg	No	No	No	Yes
Mcal_259	G232G8W04I3OBE_leg	No	No	No	No
Mcal_260	G232G8W04I3PL2_leg	No	No	No	No
Mcal_261	G232G8W04I3PMG_leg	No	No	No	No
Mcal_262	G232G8W04I3QCZ_leg	No	No	No	No
Mcal_263	G232G8W04I3S7K_leg	No	No	No	No
Mcal_264	G232G8W04I3SFQ_leg	No	No	No	No
Mcal_265	G232G8W04I3TIL_leg	No	No	No	No
Mcal_266	G232G8W04I3U80_leg	No	No	No	No
Mcal_267	G232G8W04I3Y0E_leg	No	No	No	No
Mcal_268	G232G8W04I42V2_leg	No	No	No	No
Mcal_269	G232G8W04I43IR_leg	Yes	Yes	Yes	Yes
Mcal_270	G232G8W04I43PP_leg	No	No	No	No
Mcal_271	G232G8W04I45UX_leg	No	No	No	No
Mcal_272	G232G8W04I46NB_leg	Yes	Yes	Yes	No
Mcal_273	G232G8W04I48MX_leg	No	No	No	No
Mcal_274	G232G8W04I4A2V_leg	No	Yes	No	No
Mcal_275	G232G8W04I4B3Q_leg	No	No	No	No
Mcal_276	G232G8W04I4BV4_leg	No	No	No	No
Mcal_277	G232G8W04I4EF1_leg	Yes	Yes	Yes	Yes
Mcal_278	G232G8W04I4G4Y_leg	No	No	No	No
Mcal_279	G232G8W04I4GDC_leg	No	No	No	No
Mcal_280	G232G8W04I4HM9_leg	No	Yes	No	Yes
Mcal_281	G232G8W04I4KYQ_leg	No	No	No	No
Mcal_282	G232G8W04I4LFJ_leg	No	No	No	No
Mcal_283	G232G8W04I4LSW_leg	No	No	No	No
Mcal_284	G232G8W04I4NBQ_leg	No	No	No	No
Mcal_285	G232G8W04I4QOJ_leg	No	No	No	No
Mcal_286	G232G8W04I4R09_leg	No	No	No	No
Mcal_287	G232G8W04I4X1A_leg	No	No	No	No
Mcal_288	G232G8W04I4YLY_leg	No	No	No	No
Mcal_289	G232G8W04I4ZJ0_leg	No	No	No	No
Mcal_290	G232G8W04I514X_leg	Yes	Yes	Yes	Yes
Mcal_291	G232G8W04I52HW_leg	No	No	No	No
Mcal_292	G232G8W04I55MD_leg	No	No	No	No
Mcal_293	G232G8W04I56UK_leg	No	No	No	No
Mcal_294	G232G8W04I582G_leg	No	No	No	No
Mcal_295	G232G8W04I59ZS_leg	No	No	No	No
Mcal_296	G232G8W04I5C7J_leg	No	No	No	No
Mcal_297	G232G8W04I5E2G_leg	No	No	No	No
Mcal_298	G232G8W04I5I8X_leg	No	No	No	No
Mcal_299	G232G8W04I5O7F_leg	No	No	No	No
Mcal_300	G232G8W04I5OEC_leg	No	No	No	No
Mcal_301	G232G8W04I5P1F_leg	No	No	No	No
Mcal_302	G232G8W04I5QFT_leg	No	No	No	No
Mcal_303	G232G8W04I61N8_leg	Yes	Yes	Yes	No
Mcal_304	G232G8W04I65AJ_leg	No	No	No	No
Mcal_305	G232G8W04I65K7_leg	No	Yes	No	No
Mcal_306	G232G8W04I6ACP_leg	No	No	No	No
Mcal_307	G232G8W04I6CCU_leg	No	No	No	No
Mcal_308	G232G8W04I6FFX_leg	No	No	No	No
Mcal_309	G232G8W04I6IDN_leg	No	No	No	No
Mcal_310	G232G8W04I6O7R_leg	No	No	No	No
Mcal_311	G232G8W04I6USX_leg	No	No	No	No
Mcal_312	G232G8W04I6XKE_leg	No	Yes	No	No
Mcal_313	G232G8W04I6Y9L_leg	No	No	No	No
Mcal_314	G232G8W04I72QL_leg	No	No	No	No
Mcal_315	G232G8W04I77LU_leg	No	No	No	No
Mcal_316	G232G8W04I7C7T_leg	No	No	No	No
Mcal_317	G232G8W04I7F5R_leg	No	No	No	No
Mcal_318	G232G8W04I7JCI_leg	No	No	No	No
Mcal_319	G232G8W04I7KIS_leg	No	Yes	No	No
Mcal_320	G232G8W04I7LIN_leg	No	No	No	No
Mcal_321	G232G8W04I7M4Q_leg	No	No	No	No
Mcal_322	G232G8W04I7P9Z_leg	No	No	No	No
Mcal_323	G232G8W04I7QF1_leg	No	No	No	No
Mcal_324	G232G8W04I7SZL_leg	Yes	Yes	Yes	No
Mcal_325	G232G8W04I7UWQ_leg	No	No	No	No
Mcal_326	G232G8W04I7XCK_leg	No	No	No	No
Mcal_327	G232G8W04I84NJ_leg	No	No	No	No
Mcal_328	G232G8W04I84ZB_leg	No	No	No	No
Mcal_329	G232G8W04I8AHB_leg	No	No	No	No
Mcal_330	G232G8W04I8DDW_leg	No	No	No	No
Mcal_331	G232G8W04I8J9R_leg	No	No	No	No
Mcal_332	G232G8W04I8JNC_leg	No	No	No	No
Mcal_333	G232G8W04I8M6B_leg	No	No	No	No
Mcal_334	G232G8W04I8TC5_leg	No	No	No	No
Mcal_335	G232G8W04I8THY_leg	No	No	No	No
Mcal_336	G232G8W04I92OY_leg	No	No	No	No
Mcal_337	G232G8W04I94NF_leg	No	No	No	No
Mcal_338	G232G8W04I96FI_leg	No	No	No	No
Mcal_339	G232G8W04I9BNB_leg	No	No	No	No
Mcal_340	G232G8W04I9E9D_leg	No	No	No	No
Mcal_341	G232G8W04I9HT8_leg	Yes	No	No	No
Mcal_342	G232G8W04I9KTF_leg	No	No	No	No
Mcal_343	G232G8W04I9TFB_leg	No	No	No	No
Mcal_344	G232G8W04I9WX2_leg	No	No	No	No
Mcal_345	G232G8W04IA22C_leg	No	No	No	No
Mcal_346	G232G8W04IA898_leg	No	No	No	No
Mcal_347	G232G8W04IA8PX_leg	No	No	No	No
Mcal_348	G232G8W04IAG2Y_leg	No	No	No	No
Mcal_349	G232G8W04IAKIZ_leg	No	No	No	No
Mcal_350	G232G8W04IANKK_leg	No	No	No	No
Mcal_351	G232G8W04IAQ27_leg	No	No	No	No
Mcal_352	G232G8W04IAWOB_leg	No	No	No	No
Mcal_353	G232G8W04IAWT5_leg	No	No	No	No
Mcal_354	G232G8W04IAY1L_leg	No	No	No	No
Mcal_355	G232G8W04IAYAT_leg	No	No	No	No
Mcal_356	G232G8W04IB2RY_leg	No	No	No	No
Mcal_357	G232G8W04IB4E4_leg	No	No	No	No
Mcal_358	G232G8W04IB8PY_leg	No	No	No	No
Mcal_359	G232G8W04IBAYN_leg	No	Yes	No	Yes
Mcal_360	G232G8W04IBCTE_leg	No	No	No	No
Mcal_361	G232G8W04IBXV7_leg	No	No	No	No
Mcal_362	G232G8W04IBZDW_leg	No	No	No	No
Mcal_363	G232G8W04IC3V5_leg	No	No	No	No
Mcal_364	G232G8W04IC4IF_leg	No	No	No	No
Mcal_365	G232G8W04IC575_leg	No	No	No	No
Mcal_366	G232G8W04IC6KJ_leg	No	No	No	No
Mcal_367	G232G8W04IC8E7_leg	No	No	No	No
Mcal_368	G232G8W04IC96T_leg	No	No	No	No
Mcal_369	G232G8W04ICAZ7_leg	Yes	Yes	Yes	Yes
Mcal_370	G232G8W04ICBSD_leg	No	No	No	No
Mcal_371	G232G8W04ICCAP_leg	No	No	No	No
Mcal_372	G232G8W04ICERP_leg	Yes	Yes	Yes	Yes
Mcal_373	G232G8W04ICKKY_leg	No	No	No	No
Mcal_374	G232G8W04ICKNG_leg	No	No	No	No
Mcal_375	G232G8W04ICNIQ_leg	No	No	No	No
Mcal_376	G232G8W04ICQ4H_leg	No	No	No	Yes
Mcal_377	G232G8W04ICUZK_leg	No	Yes	No	No
Mcal_378	G232G8W04ID2C5_leg	No	No	No	No
Mcal_379	G232G8W04ID4PF_leg	Yes	Yes	Yes	No
Mcal_380	G232G8W04IDHCC_leg	No	No	No	No
Mcal_381	G232G8W04IDJ8M_leg	No	No	No	No
Mcal_382	G232G8W04IDMH3_leg	No	No	No	No
Mcal_383	G232G8W04IDPDV_leg	No	No	No	No
Mcal_384	G232G8W04IDUX7_leg	No	No	No	No
Mcal_385	G232G8W04IE90G_leg	No	No	No	No
Mcal_386	G232G8W04IEBIC_leg	No	No	No	No
Mcal_387	G232G8W04IEBV4_leg	No	No	No	No
Mcal_388	G232G8W04IEEVL_leg	No	No	No	No
Mcal_389	G232G8W04IEON7_leg	No	No	No	No
Mcal_390	G232G8W04IEPB0_leg	Yes	Yes	Yes	Yes
Mcal_391	G232G8W04IEPC6_leg	No	Yes	No	Yes
Mcal_392	G232G8W04IEPK2_leg	Yes	Yes	Yes	Yes
Mcal_393	G232G8W04IEQ5F_leg	No	No	No	No
Mcal_394	G232G8W04IEST4_leg	No	No	No	No
Mcal_395	G232G8W04IEWMV_leg	No	No	No	No
Mcal_396	G232G8W04IEZSO_leg	No	No	No	No
Mcal_397	G232G8W04IF1Q0_leg	No	No	No	No
Mcal_398	G232G8W04IF27M_leg	No	No	No	No
Mcal_399	G232G8W04IF58R_leg	No	No	No	No
Mcal_400	G232G8W04IF6L1_leg	No	No	No	No
Mcal_401	G232G8W04IF79S_leg	No	No	No	No
Mcal_402	G232G8W04IF7UO_leg	No	No	No	No
Mcal_403	G232G8W04IFBKA_leg	No	No	No	No
Mcal_404	G232G8W04IFDIL_leg	No	No	No	No
Mcal_405	G232G8W04IFEWQ_leg	No	No	No	No
Mcal_406	G232G8W04IFH3T_leg	Yes	Yes	Yes	No
Mcal_407	G232G8W04IFK2X_leg	No	No	No	No
Mcal_408	G232G8W04IFL67_leg	No	No	No	No
Mcal_409	G232G8W04IFM98_leg	No	Yes	No	No
Mcal_410	G232G8W04IFMIJ_leg	No	No	No	No
Mcal_411	G232G8W04IFOZ0_leg	Yes	Yes	Yes	Yes
Mcal_412	G232G8W04IFPGZ_leg	No	No	No	No
Mcal_413	G232G8W04IFPTL_leg	No	No	No	No
Mcal_414	G232G8W04IFQSV_leg	Yes	Yes	Yes	No
Mcal_415	G232G8W04IFSIR_leg	No	No	No	No
Mcal_416	G232G8W04IFWKK_leg	No	No	No	No
Mcal_417	G232G8W04IG1QL_leg	No	No	No	No
Mcal_418	G232G8W04IG3SG_leg	Yes	Yes	Yes	No
Mcal_419	G232G8W04IG68K_leg	No	No	No	No
Mcal_420	G232G8W04IGI1G_leg	No	No	No	No
Mcal_421	G232G8W04IGMLH_leg	No	No	No	No
Mcal_422	G232G8W04IGO2G_leg	No	No	No	No
Mcal_423	G232G8W04IGOVG_leg	No	No	No	No
Mcal_424	G232G8W04IGP9R_leg	No	No	No	No
Mcal_425	G232G8W04IGT29_leg	No	Yes	No	Yes
Mcal_426	G232G8W04IGWM5_leg	No	No	No	No
Mcal_427	G232G8W04IGXLP_leg	Yes	Yes	Yes	No
Mcal_428	G232G8W04IGZDN_leg	No	No	No	No
Mcal_429	G232G8W04IH08B_leg	Yes	No	No	No
Mcal_430	G232G8W04IH3DG_leg	Yes	Yes	Yes	Yes
Mcal_431	G232G8W04IH5JI_leg	No	No	No	No
Mcal_432	G232G8W04IH6YJ_leg	No	No	No	No
Mcal_433	G232G8W04IHB0X_leg	No	No	No	No
Mcal_434	G232G8W04IHDMS_leg	Yes	Yes	Yes	Yes
Mcal_435	G232G8W04IHEYH_leg	Yes	Yes	Yes	No
Mcal_436	G232G8W04IHF6S_leg	No	No	No	No
Mcal_437	G232G8W04IHGDW_leg	Yes	No	No	No
Mcal_438	G232G8W04IHNBP_leg	No	No	No	No
Mcal_439	G232G8W04IHQGH_leg	Yes	Yes	Yes	Yes
Mcal_440	G232G8W04IHTG4_leg	No	No	No	No
Mcal_441	G232G8W04IHUME_leg	No	No	No	No
Mcal_442	G232G8W04IHWMM_leg	No	No	No	No
Mcal_443	G232G8W04IHWVR_leg	No	No	No	Yes
Mcal_444	G232G8W04IHXI3_leg	No	No	No	No
Mcal_445	G232G8W04II3HW_leg	No	No	No	No
Mcal_446	G232G8W04II48E_leg	Yes	Yes	Yes	Yes
Mcal_447	G232G8W04II49Y_leg	No	No	No	No
Mcal_448	G232G8W04II802_leg	No	No	No	No
Mcal_449	G232G8W04II8LJ_leg	No	No	No	No
Mcal_450	G232G8W04IIA1Y_leg	No	No	No	No
Mcal_451	G232G8W04IIDUC_leg	No	No	No	No
Mcal_452	G232G8W04IIF67_leg	No	No	No	No
Mcal_453	G232G8W04IILPN_leg	No	No	No	No
Mcal_454	G232G8W04IIQEZ_leg	No	No	No	No
Mcal_455	G232G8W04IISUT_leg	No	No	No	No
Mcal_456	G232G8W04IITA8_leg	No	No	No	No
Mcal_457	G232G8W04IITUQ_leg	No	Yes	No	No
Mcal_458	G232G8W04IIVAG_leg	No	No	No	No
Mcal_459	G232G8W04IJ70M_leg	Yes	Yes	Yes	No
Mcal_460	G232G8W04IJ7GG_leg	No	No	No	No
Mcal_461	G232G8W04IJB47_leg	No	No	No	No
Mcal_462	G232G8W04IJCCA_leg	Yes	Yes	Yes	No
Mcal_463	G232G8W04IJCG8_leg	No	No	No	No
Mcal_464	G232G8W04IJDVJ_leg	No	No	No	No
Mcal_465	G232G8W04IJFD4_leg	No	No	No	No
Mcal_466	G232G8W04IJFGR_leg	No	No	No	No
Mcal_467	G232G8W04IJIH5_leg	No	No	No	No
Mcal_468	G232G8W04IJISL_leg	No	No	No	No
Mcal_469	G232G8W04IJKAY_leg	No	No	No	No
Mcal_470	G232G8W04IJMD5_leg	Yes	Yes	Yes	No
Mcal_471	G232G8W04IJQGP_leg	No	No	No	No
Mcal_472	G232G8W04IJUB6_leg	No	No	No	No
Mcal_473	G232G8W04IJUIM_leg	No	Yes	No	No
Mcal_474	G232G8W04IJW20_leg	No	No	No	No
Mcal_475	G232G8W04IJX5Q_leg	No	No	No	No
Mcal_476	G232G8W04IJZ8Q_leg	No	Yes	No	No
Mcal_477	G232G8W04IK0KB_leg	No	No	No	No
Mcal_478	G232G8W04IK2PZ_leg	No	No	No	No
Mcal_479	G232G8W04IK6NE_leg	No	No	No	No
Mcal_480	G232G8W04IKBCF_leg	No	Yes	No	No
Mcal_481	G232G8W04IKD8S_leg	No	No	No	No
Mcal_482	G232G8W04IKELU_leg	No	No	No	No
Mcal_483	G232G8W04IKFUS_leg	No	Yes	No	No
Mcal_484	G232G8W04IKJET_leg	No	No	No	No
Mcal_485	G232G8W04IKJUF_leg	No	Yes	No	No
Mcal_486	G232G8W04IKQEV_leg	No	No	No	No
Mcal_487	G232G8W04IKQZ4_leg	No	No	No	No
Mcal_488	G232G8W04IKRR9_leg	No	No	No	No
Mcal_489	G232G8W04IKS2C_leg	No	Yes	No	No
Mcal_490	G232G8W04IKWH9_leg	No	No	No	No
Mcal_491	G232G8W04IKX4G_leg	No	No	No	No
Mcal_492	G232G8W04IKXNC_leg	No	No	No	No
Mcal_493	G232G8W04IKZX2_leg	No	Yes	No	No
Mcal_494	G232G8W04IL0FO_leg	No	No	No	No
Mcal_495	G232G8W04IL0SR_leg	No	No	No	No
Mcal_496	G232G8W04IL1U6_leg	No	No	No	No
Mcal_497	G232G8W04IL1ZN_leg	No	No	No	No
Mcal_498	G232G8W04IL7K3_leg	No	Yes	No	No
Mcal_499	G232G8W04IL9AU_leg	No	No	No	Yes
Mcal_500	G232G8W04ILANJ_leg	No	No	No	No
Mcal_501	G232G8W04ILHMH_leg	No	No	No	No
Mcal_502	G232G8W04ILHNH_leg	No	No	No	No
Mcal_503	G232G8W04ILHYS_leg	Yes	No	No	No
Mcal_504	G232G8W04ILO5W_leg	Yes	Yes	Yes	Yes
Mcal_505	G232G8W04ILR2H_leg	No	No	No	No
Mcal_506	G232G8W04ILWNX_leg	No	No	No	Yes
Mcal_507	G232G8W04ILXSL_leg	No	No	No	No
Mcal_508	G232G8W04ILZFZ_leg	No	No	No	No
Mcal_509	G232G8W04ILZOM_leg	No	No	No	No
Mcal_510	G232G8W04IM054_leg	No	No	No	No
Mcal_511	G232G8W04IM7UX_leg	No	No	No	No
Mcal_512	G232G8W04IM83S_leg	No	No	No	No
Mcal_513	G232G8W04IMAAV_leg	No	No	No	No
Mcal_514	G232G8W04IMBYE_leg	No	No	No	No
Mcal_515	G232G8W04IMCMF_leg	No	No	No	No
Mcal_516	G232G8W04IMEGM_leg	No	No	No	No
Mcal_517	G232G8W04IMFHS_leg	No	No	No	No
Mcal_518	G232G8W04IMHZI_leg	No	No	No	No
Mcal_519	G232G8W04IMLIO_leg	No	No	No	No
Mcal_520	G232G8W04IMUR7_leg	No	No	No	No
Mcal_521	G232G8W04IMWBB_leg	No	No	No	No
Mcal_522	G232G8W04IMWIA_leg	No	No	No	No
Mcal_523	G232G8W04IN0QJ_leg	No	No	No	No
Mcal_524	G232G8W04IN4YA_leg	Yes	Yes	Yes	Yes
Mcal_525	G232G8W04IN7M1_leg	No	No	No	No
Mcal_526	G232G8W04IN7OL_leg	No	No	No	No
Mcal_527	G232G8W04IN95Q_leg	No	No	No	No
Mcal_528	G232G8W04INCZP_leg	No	No	No	No
Mcal_529	G232G8W04ING5N_leg	No	No	No	No
Mcal_530	G232G8W04INHI0_leg	Yes	Yes	Yes	No
Mcal_531	G232G8W04INKGP_leg	No	No	No	No
Mcal_532	G232G8W04INQKT_leg	No	Yes	No	No
Mcal_533	G232G8W04INSKI_leg	No	No	No	No
Mcal_534	G232G8W04INVHF_leg	No	No	No	No
Mcal_535	G232G8W04INVK7_leg	No	No	No	No
Mcal_536	G232G8W04INXWZ_leg	No	No	No	No
Mcal_537	G232G8W04IO0A0_leg	No	No	No	No
Mcal_538	G232G8W04IO5CW_leg	No	No	No	No
Mcal_539	G232G8W04IO6YO_leg	No	No	No	No
Mcal_540	G232G8W04IO78R_leg	No	No	No	No
Mcal_541	G232G8W04IO7UO_leg	Yes	Yes	Yes	No
Mcal_542	G232G8W04IO8N4_leg	No	No	No	No
Mcal_543	G232G8W04IOBPY_leg	No	No	No	No
Mcal_544	G232G8W04IOD40_leg	No	No	No	No
Mcal_545	G232G8W04IOEF5_leg	No	No	No	No
Mcal_546	G232G8W04IOFF1_leg	No	No	No	No
Mcal_547	G232G8W04IOGDC_leg	No	No	No	No
Mcal_548	G232G8W04IOI96_leg	No	No	No	No
Mcal_549	G232G8W04IOIJ1_leg	Yes	Yes	Yes	Yes
Mcal_550	G232G8W04IONE5_leg	No	Yes	No	No
Mcal_551	G232G8W04IOO34_leg	No	No	No	No
Mcal_552	G232G8W04IOUZA_leg	No	No	No	No
Mcal_553	G232G8W04IOX10_leg	No	No	No	No
Mcal_554	G232G8W04IP35G_leg	No	Yes	No	No
Mcal_555	G232G8W04IP9HM_leg	No	No	No	No
Mcal_556	G232G8W04IPBUQ_leg	No	No	No	No
Mcal_557	G232G8W04IPC51_leg	No	No	No	No
Mcal_558	G232G8W04IPG56_leg	No	Yes	No	No
Mcal_559	G232G8W04IPMK7_leg	Yes	Yes	Yes	Yes
Mcal_560	G232G8W04IPRDV_leg	No	No	No	No
Mcal_561	G232G8W04IPS8U_leg	No	No	No	No
Mcal_562	G232G8W04IPUB5_leg	No	No	No	No
Mcal_563	G232G8W04IPWYL_leg	No	No	No	No
Mcal_564	G232G8W04IQ1C6_leg	No	No	No	No
Mcal_565	G232G8W04IQ29C_leg	No	No	No	No
Mcal_566	G232G8W04IQ2RD_leg	No	No	No	No
Mcal_567	G232G8W04IQ2RZ_leg	No	Yes	No	Yes
Mcal_568	G232G8W04IQ4OQ_leg	No	Yes	No	Yes
Mcal_569	G232G8W04IQ8P5_leg	No	No	No	No
Mcal_570	G232G8W04IQDTF_leg	No	No	No	No
Mcal_571	G232G8W04IQGXL_leg	No	No	No	No
Mcal_572	G232G8W04IQGZX_leg	No	No	No	No
Mcal_573	G232G8W04IQH0H_leg	No	No	No	No
Mcal_574	G232G8W04IQL4N_leg	No	No	No	No
Mcal_575	G232G8W04IQMPG_leg	No	No	No	No
Mcal_576	G232G8W04IQPBI_leg	No	No	No	No
Mcal_577	G232G8W04IQRGX_leg	No	No	No	Yes
Mcal_578	G232G8W04IQRP6_leg	No	No	No	No
Mcal_579	G232G8W04IQS8P_leg	No	No	No	No
Mcal_580	G232G8W04IQTV4_leg	No	No	No	No
Mcal_581	G232G8W04IQU1R_leg	No	No	No	No
Mcal_582	G232G8W04IQUA2_leg	No	No	No	No
Mcal_583	G232G8W04IQX1O_leg	No	No	No	No
Mcal_584	G232G8W04IR07K_leg	No	No	No	No
Mcal_585	G232G8W04IR2SR_leg	No	Yes	No	No
Mcal_586	G232G8W04IR3SK_leg	No	No	No	No
Mcal_587	G232G8W04IR5X2_leg	No	No	No	No
Mcal_588	G232G8W04IR7LY_leg	No	No	No	No
Mcal_589	G232G8W04IR8GW_leg	Yes	Yes	Yes	Yes
Mcal_590	G232G8W04IRB8F_leg	No	No	No	No
Mcal_591	G232G8W04IRCKI_leg	No	No	No	No
Mcal_592	G232G8W04IRDWJ_leg	No	No	No	No
Mcal_593	G232G8W04IREJJ_leg	No	No	No	No
Mcal_594	G232G8W04IRTHA_leg	No	No	No	No
Mcal_595	G232G8W04IRU5B_leg	No	No	No	No
Mcal_596	G232G8W04IS0MH_leg	No	No	No	No
Mcal_597	G232G8W04IS4QO_leg	Yes	Yes	Yes	Yes
Mcal_598	G232G8W04IS75U_leg	No	No	No	No
Mcal_599	G232G8W04IS7XO_leg	No	No	No	No
Mcal_600	G232G8W04IS8R6_leg	Yes	Yes	Yes	No
Mcal_601	G232G8W04IS8TJ_leg	No	No	No	No
Mcal_602	G232G8W04IS8ZV_leg	Yes	Yes	Yes	Yes
Mcal_603	G232G8W04ISF1T_leg	No	No	No	No
Mcal_604	G232G8W04ISHM3_leg	No	No	No	No
Mcal_605	G232G8W04ISHU4_leg	Yes	No	No	No
Mcal_606	G232G8W04ISI6L_leg	Yes	Yes	Yes	No
Mcal_607	G232G8W04ISK3K_leg	No	No	No	No
Mcal_608	G232G8W04ISKCF_leg	No	No	No	No
Mcal_609	G232G8W04ISLJB_leg	No	No	No	No
Mcal_610	G232G8W04ISNT0_leg	Yes	Yes	Yes	No
Mcal_611	G232G8W04ISQX7_leg	No	Yes	No	No
Mcal_612	G232G8W04ISSXK_leg	No	No	No	No
Mcal_613	G232G8W04ISX39_leg	No	No	No	No
Mcal_614	G232G8W04IT07Y_leg	No	No	No	No
Mcal_615	G232G8W04IT1VS_leg	No	No	No	No
Mcal_616	G232G8W04IT3OJ_leg	Yes	No	No	No
Mcal_617	G232G8W04IT816_leg	No	No	No	No
Mcal_618	G232G8W04IT8VM_leg	No	No	No	No
Mcal_619	G232G8W04ITBVU_leg	No	Yes	No	No
Mcal_620	G232G8W04ITEBS_leg	No	No	No	No
Mcal_621	G232G8W04ITV3R_leg	No	No	No	No
Mcal_622	G232G8W04ITVF8_leg	No	No	No	No
Mcal_623	G232G8W04IU3KX_leg	No	No	No	No
Mcal_624	G232G8W04IU4K0_leg	No	No	No	No
Mcal_625	G232G8W04IU7ET_leg	No	No	No	No
Mcal_626	G232G8W04IU87W_leg	No	No	No	No
Mcal_627	G232G8W04IUECS_leg	No	No	No	No
Mcal_628	G232G8W04IUGEV_leg	No	No	No	No
Mcal_629	G232G8W04IUIL8_leg	No	No	No	No
Mcal_630	G232G8W04IUKHS_leg	No	Yes	No	No
Mcal_631	G232G8W04IUOB9_leg	No	No	No	No
Mcal_632	G232G8W04IURNV_leg	No	No	No	No
Mcal_633	G232G8W04IUTS9_leg	Yes	Yes	Yes	Yes
Mcal_634	G232G8W04IUTZ2_leg	No	No	No	No
Mcal_635	G232G8W04IUV7V_leg	No	No	No	No
Mcal_636	G232G8W04IUZM4_leg	No	No	No	No
Mcal_637	G232G8W04IV2OA_leg	No	No	No	No
Mcal_638	G232G8W04IV527_leg	No	No	No	No
Mcal_639	G232G8W04IV8E0_leg	No	No	No	No
Mcal_640	G232G8W04IV8P7_leg	No	No	No	No
Mcal_641	G232G8W04IVCQ9_leg	No	No	No	No
Mcal_642	G232G8W04IVH18_leg	No	No	No	Yes
Mcal_643	G232G8W04IVL75_leg	No	No	No	No
Mcal_644	G232G8W04IVPTU_leg	No	No	No	No
Mcal_645	G232G8W04IVQSZ_leg	Yes	No	No	No
Mcal_646	G232G8W04IVVK4_leg	No	No	No	No
Mcal_647	G232G8W04IVWW2_leg	No	No	No	No
Mcal_648	G232G8W04IW1G6_leg	No	No	No	No
Mcal_649	G232G8W04IW4L3_leg	No	No	No	No
Mcal_650	G232G8W04IW63W_leg	No	No	No	No
Mcal_651	G232G8W04IWCOK_leg	No	No	No	No
Mcal_652	G232G8W04IWCV5_leg	No	No	No	No
Mcal_653	G232G8W04IWFZY_leg	Yes	Yes	Yes	No
Mcal_654	G232G8W04IWIX4_leg	Yes	Yes	Yes	Yes
Mcal_655	G232G8W04IWLPH_leg	No	No	No	No
Mcal_656	G232G8W04IWRBQ_leg	No	No	No	No
Mcal_657	G232G8W04IWVTM_leg	Yes	No	No	No
Mcal_658	G232G8W04IWXFC_leg	No	No	No	No
Mcal_659	G232G8W04IWXTD_leg	No	No	No	No
Mcal_660	G232G8W04IX1D2_leg	No	No	No	No
Mcal_661	G232G8W04IX2TW_leg	No	No	No	No
Mcal_662	G232G8W04IX2W7_leg	No	Yes	No	No
Mcal_663	G232G8W04IX6OO_leg	No	No	No	No
Mcal_664	G232G8W04IX7WA_leg	No	No	No	No
Mcal_665	G232G8W04IX95Y_leg	No	No	No	No
Mcal_666	G232G8W04IX9RM_leg	Yes	Yes	Yes	No
Mcal_667	G232G8W04IXEJF_leg	No	No	No	No
Mcal_668	G232G8W04IXG5H_leg	No	No	No	No
Mcal_669	G232G8W04IXIW6_leg	No	No	No	No
Mcal_670	G232G8W04IXL2L_leg	No	No	No	No
Mcal_671	G232G8W04IXMIF_leg	No	No	No	No
Mcal_672	G232G8W04IXMK3_leg	No	No	No	No
Mcal_673	G232G8W04IXN5X_leg	No	No	No	No
Mcal_674	G232G8W04IXP3O_leg	No	No	No	No
Mcal_675	G232G8W04IXUK7_leg	No	No	No	No
Mcal_676	G232G8W04IY5UJ_leg	No	Yes	No	No
Mcal_677	G232G8W04IY6JG_leg	Yes	Yes	Yes	Yes
Mcal_678	G232G8W04IYIGU_leg	No	No	No	No
Mcal_679	G232G8W04IYIW9_leg	Yes	No	No	No
Mcal_680	G232G8W04IYMD9_leg	No	No	No	No
Mcal_681	G232G8W04IYPRS_leg	No	No	No	No
Mcal_682	G232G8W04IYSYY_leg	No	No	No	No
Mcal_683	G232G8W04IYURH_leg	Yes	No	No	No
Mcal_684	G232G8W04IYVNX_leg	No	No	No	No
Mcal_685	G232G8W04IYXXJ_leg	No	No	No	No
Mcal_686	G232G8W04IYZG3_leg	No	No	No	No
Mcal_687	G232G8W04IZ0T4_leg	No	No	No	No
Mcal_688	G232G8W04IZ351_leg	No	No	No	No
Mcal_689	G232G8W04IZ3PZ_leg	No	No	No	No
Mcal_690	G232G8W04IZ7Q6_leg	No	No	No	No
Mcal_691	G232G8W04IZ8HJ_leg	No	No	No	No
Mcal_692	G232G8W04IZ90H_leg	No	No	No	No
Mcal_693	G232G8W04IZ9QP_leg	No	No	No	No
Mcal_694	G232G8W04IZAE6_leg	No	No	No	No
Mcal_695	G232G8W04IZBVN_leg	No	No	No	No
Mcal_696	G232G8W04IZDPM_leg	No	No	No	No
Mcal_697	G232G8W04IZO3U_leg	No	No	No	No
Mcal_698	G232G8W04IZOMI_leg	No	No	No	No
Mcal_699	G232G8W04IZTKF_leg	No	No	No	No
Mcal_700	G232G8W04IZW0L_leg	No	No	No	No
Mcal_701	G232G8W04IZWK6_leg	No	No	No	No
Mcal_702	G232G8W04IZX8U_leg	No	Yes	No	No
Mcal_703	G232G8W04IZYJ4_leg	No	No	No	No
Mcal_704	G232G8W04J0C6V_leg	Yes	Yes	Yes	Yes
Mcal_705	G232G8W04J1AIV_leg	Yes	Yes	Yes	Yes
Mcal_706	G232G8W04J1PYN_leg	No	No	No	No
Mcal_707	G232G8W04JA2O1_leg	No	Yes	No	No
Mcal_708	G232G8W04JA3C3_leg	No	No	No	No
Mcal_709	G232G8W04JA8KS_leg	No	No	No	No
Mcal_710	G232G8W04JABE5_leg	No	No	No	No
Mcal_711	G232G8W04JAI8P_leg	Yes	Yes	Yes	No
Mcal_712	G232G8W04JAIFH_leg	No	No	No	No
Mcal_713	G232G8W04JAJGW_leg	No	No	No	No
Mcal_714	G232G8W04JB2MQ_leg	No	No	No	No
Mcal_715	G232G8W04JBJJN_leg	No	No	No	No
Mcal_716	G232G8W04JBOSD_leg	No	No	No	No
Mcal_717	G232G8W04JBSED_leg	No	No	No	No
Mcal_718	G232G8W04JBSOU_leg	No	No	No	No
Mcal_719	G232G8W04JC0TI_leg	Yes	Yes	Yes	No
Mcal_720	G232G8W04JC25Z_leg	No	No	No	No
Mcal_721	G232G8W04JC2TN_leg	No	No	No	No
Mcal_722	G232G8W04JC3BX_leg	No	No	No	No
Mcal_723	G232G8W04JCDZW_leg	No	No	No	No
Mcal_724	G232G8W04JCK1C_leg	No	No	No	No
Mcal_725	G232G8W04JCLGK_leg	No	No	No	No
Mcal_726	G232G8W04JCQJ4_leg	Yes	Yes	Yes	No
Mcal_727	G232G8W04JCWSB_leg	No	No	No	No
Mcal_728	G232G8W04JCXTX_leg	No	No	No	No
Mcal_729	G232G8W04JD11Y_leg	No	Yes	No	Yes
Mcal_730	G232G8W04JD1X1_leg	No	No	No	No
Mcal_731	G232G8W04JD3D3_leg	No	No	No	No
Mcal_732	G232G8W04JD78X_leg	No	No	No	No
Mcal_733	G232G8W04JD7HM_leg	No	No	No	No
Mcal_734	G232G8W04JD80K_leg	No	No	No	No
Mcal_735	G232G8W04JD93J_leg	Yes	Yes	Yes	Yes
Mcal_736	G232G8W04JDFEG_leg	No	No	No	No
Mcal_737	G232G8W04JDFHK_leg	No	No	No	No
Mcal_738	G232G8W04JDFQ6_leg	No	No	No	No
Mcal_739	G232G8W04JDFYM_leg	No	No	No	No
Mcal_740	G232G8W04JDG5S_leg	No	No	No	No
Mcal_741	G232G8W04JDQOB_leg	No	No	No	No
Mcal_742	G232G8W04JDUYI_leg	No	No	No	No
Mcal_743	G232G8W04JE0YW_leg	No	No	No	No
Mcal_744	G232G8W04JE3Y7_leg	No	No	No	No
Mcal_745	G232G8W04JEK91_leg	No	No	No	No
Mcal_746	G232G8W04JEL0I_leg	No	No	No	No
Mcal_747	G232G8W04JELPR_leg	No	No	No	No
Mcal_748	G232G8W04JEXB0_leg	No	No	No	No
Mcal_749	G232G8W04JEXQ9_leg	No	No	No	No
Mcal_750	G232G8W04JF33A_leg	No	No	No	No
Mcal_751	G232G8W04JF3M8_leg	No	No	No	No
Mcal_752	G232G8W04JFFOL_leg	No	No	No	No
Mcal_753	G232G8W04JFSGO_leg	No	Yes	No	No
Mcal_754	G232G8W04JFVT8_leg	No	No	No	No
Mcal_755	G232G8W04JG2PI_leg	Yes	Yes	Yes	Yes
Mcal_756	G232G8W04JG5YE_leg	No	No	No	No
Mcal_757	G232G8W04JG7DA_leg	No	No	No	No
Mcal_758	G232G8W04JGBVE_leg	Yes	Yes	Yes	No
Mcal_759	G232G8W04JGKP9_leg	No	No	No	No
Mcal_760	G232G8W04JGMN3_leg	Yes	Yes	Yes	Yes
Mcal_761	G232G8W04JGTQJ_leg	No	No	No	No
Mcal_762	G232G8W04JGUZA_leg	No	No	No	No
Mcal_763	G232G8W04JH21K_leg	No	No	No	No
Mcal_764	G232G8W04JHOM4_leg	No	No	No	No
Mcal_765	G232G8W04JHT12_leg	No	No	No	No
Mcal_766	G232G8W04JHVTW_leg	No	No	No	No
Mcal_767	G232G8W04JHW3I_leg	No	No	No	No
Mcal_768	G232G8W04JI0B1_leg	No	No	No	No
Mcal_769	G232G8W04JI15M_leg	No	No	No	No
Mcal_770	G232G8W04JI55T_leg	No	No	No	No
Mcal_771	G232G8W04JI8JR_leg	No	No	No	No
Mcal_772	G232G8W04JI9ET_leg	No	No	No	No
Mcal_773	G232G8W04JIIUU_leg	No	No	No	No
Mcal_774	G232G8W04JILKX_leg	No	No	No	No
Mcal_775	G232G8W04JISU5_leg	No	Yes	No	No
Mcal_776	G232G8W04JIYEN_leg	No	No	No	No
Mcal_777	G232G8W04JJ0U1_leg	No	Yes	No	No
Mcal_778	G232G8W04JJ9I8_leg	No	No	No	No
Mcal_779	G232G8W04JJA8J_leg	No	No	No	No
Mcal_780	G232G8W04JJH5U_leg	No	No	No	No
Mcal_781	G232G8W04JJJBL_leg	No	No	No	No
Mcal_782	G232G8W04JJMDR_leg	No	No	No	No
Mcal_783	G232G8W04JJNM3_leg	No	No	No	No
Mcal_784	G232G8W04JJQE6_leg	Yes	Yes	Yes	Yes
Mcal_785	G232G8W04JJS61_leg	No	No	No	No
Mcal_786	G232G8W04JJTFB_leg	No	No	No	No
Mcal_787	G232G8W04JJTKE_leg	No	No	No	No
Mcal_788	G232G8W04JJUHV_leg	No	No	No	No
Mcal_789	G232G8W04JK3R7_leg	No	No	No	No
Mcal_790	G232G8W04JK441_leg	No	No	No	No
Mcal_791	G232G8W04JK61W_leg	No	No	No	No
Mcal_792	G232G8W04JK7C7_leg	No	No	No	No
Mcal_793	G232G8W04JKEXH_leg	No	Yes	No	No
Mcal_794	G232G8W04JKFI9_leg	No	No	No	No
Mcal_795	G232G8W04JKKB7_leg	Yes	Yes	Yes	Yes
Mcal_796	G232G8W04JKNOK_leg	No	No	No	No
Mcal_797	G232G8W04JKT0I_leg	No	No	No	No
Mcal_798	G232G8W04JKZAD_leg	No	No	No	No
Mcal_799	G232G8W04JKZPS_leg	No	No	No	No
Mcal_800	G232G8W04JL055_leg	No	No	No	No
Mcal_801	G232G8W04JL1DL_leg	No	No	No	No
Mcal_802	G232G8W04JL9PY_leg	No	Yes	No	No
Mcal_803	G232G8W04JLFWX_leg	No	No	No	No
Mcal_804	G232G8W04JLWZ2_leg	Yes	Yes	Yes	Yes
Mcal_805	G232G8W04JM4GS_leg	No	No	No	No
Mcal_806	G232G8W04JM5HT_leg	No	No	No	No
Mcal_807	G232G8W04JM6N4_leg	No	No	No	No
Mcal_808	G232G8W04JM904_leg	No	No	No	No
Mcal_809	G232G8W04JMAKW_leg	No	No	No	No
Mcal_810	G232G8W04JMAVD_leg	No	No	No	No
Mcal_811	G232G8W04JMJYO_leg	No	No	No	No
Mcal_812	G232G8W04JMMAC_leg	No	No	No	No
Mcal_813	G232G8W04JMOKH_leg	No	No	No	No
Mcal_814	G232G8W04JMQV2_leg	No	No	No	No
Mcal_815	G232G8W04JMUCM_leg	No	No	No	No
Mcal_816	G232G8W04JMV5A_leg	No	No	No	No
Mcal_817	G232G8W04JN1Q8_leg	Yes	Yes	Yes	Yes
Mcal_818	G232G8W04JN6QD_leg	No	No	No	No
Mcal_819	G232G8W04JNA19_leg	No	No	No	No
Mcal_820	G232G8W04JNAAF_leg	No	Yes	No	No
Mcal_821	G232G8W04JNALL_leg	No	No	No	No
Mcal_822	G232G8W04JNDBI_leg	No	Yes	No	No
Mcal_823	G232G8W04JNFEF_leg	No	No	No	No
Mcal_824	G232G8W04JNSBM_leg	No	No	No	No
Mcal_825	G232G8W04JO4AX_leg	No	No	No	No
Mcal_826	G232G8W04JO6CQ_leg	No	No	No	No
Mcal_827	G232G8W04JO92R_leg	No	No	No	No
Mcal_828	G232G8W04JOC21_leg	No	No	No	No
Mcal_829	G232G8W04JOD1Y_leg	No	No	No	No
Mcal_830	G232G8W04JOU3A_leg	No	No	No	No
Mcal_831	G232G8W04JOVR7_leg	No	No	No	No
Mcal_832	G232G8W04JOZYP_leg	No	No	No	No
Mcal_833	G232G8W04JP010_leg	No	No	No	No
Mcal_834	G232G8W04JP631_leg	No	No	No	No
Mcal_835	G232G8W04JP94W_leg	No	No	No	No
Mcal_836	G232G8W04JPAUQ_leg	No	No	No	No
Mcal_837	G232G8W04JPBR3_leg	Yes	Yes	Yes	No
Mcal_838	G232G8W04JPKOP_leg	Yes	Yes	Yes	Yes
Mcal_839	G232G8W04JPVYB_leg	Yes	Yes	Yes	Yes
Mcal_840	G232G8W04JPWVJ_leg	No	No	No	No
Mcal_841	G232G8W04JPZ2F_leg	No	No	No	No
Mcal_842	G232G8W04JQ1H3_leg	No	No	No	No
Mcal_843	G232G8W04JQ58Y_leg	No	No	No	No
Mcal_844	G232G8W04JQ8PQ_leg	No	No	No	No
Mcal_845	G232G8W04JQJ1A_leg	No	Yes	No	No
Mcal_846	G232G8W04JQM5O_leg	No	No	No	No
Mcal_847	G232G8W04JQR2R_leg	No	No	No	No
Mcal_848	G232G8W04JQWF5_leg	No	No	No	No
Mcal_849	G232G8W04JR3PO_leg	No	No	No	No
Mcal_850	G232G8W04JR405_leg	No	No	No	No
Mcal_851	G232G8W04JR6J8_leg	No	No	No	No
Mcal_852	G232G8W04JR6W0_leg	No	No	No	No
Mcal_853	G232G8W04JRDQZ_leg	No	No	No	No
Mcal_854	G232G8W04JRHEQ_leg	No	No	No	No
Mcal_855	G232G8W04JRISG_leg	Yes	Yes	Yes	Yes
Mcal_856	G232G8W04JRJOX_leg	No	No	No	No
Mcal_857	G232G8W04JROGF_leg	No	No	No	No
Mcal_858	G232G8W04JRTBI_leg	No	No	No	No
Mcal_859	G232G8W04JS0IK_leg	No	No	No	No
Mcal_860	G232G8W04JS74S_leg	No	No	No	No
Mcal_861	G232G8W04JS8J4_leg	No	No	No	No
Mcal_862	G232G8W04JS9LE_leg	Yes	No	No	No
Mcal_863	G232G8W04JSG5S_leg	No	No	No	No
Mcal_864	G232G8W04JSG85_leg	No	No	No	No
Mcal_865	G232G8W04JSLPC_leg	No	No	No	No
Mcal_866	G232G8W04JSMUV_leg	No	No	No	No
Mcal_867	G232G8W04JSNN8_leg	No	No	No	No
Mcal_868	G232G8W04JSOMF_leg	Yes	Yes	Yes	Yes
Mcal_869	G232G8W04JSW6M_leg	No	No	No	No
Mcal_870	G232G8W04JT31T_leg	No	No	No	No
Mcal_871	G232G8W04JT3BE_leg	No	No	No	No
Mcal_872	G232G8W04JT7QV_leg	No	No	No	No
Mcal_873	G232G8W04JTCZG_leg	No	No	No	No
Mcal_874	G232G8W04JTEFF_leg	No	No	No	No
Mcal_875	G232G8W04JTH1J_leg	No	No	No	No
Mcal_876	G232G8W04JTHLS_leg	No	Yes	No	No
Mcal_877	G232G8W04JU997_leg	No	No	No	No
Mcal_878	G232G8W04JUCHX_leg	No	No	No	No
Mcal_879	G232G8W04JUHAH_leg	Yes	Yes	Yes	No
Mcal_880	G232G8W04JUL3E_leg	No	No	No	No
Mcal_881	G232G8W04JUMOU_leg	No	No	No	No
Mcal_882	G232G8W04JUY1F_leg	No	No	No	No
Mcal_883	G232G8W04JV09L_leg	No	No	No	No
Mcal_884	G232G8W04JV2QX_leg	No	No	No	No
Mcal_885	G232G8W04JV559_leg	No	No	No	No
Mcal_886	G232G8W04JV6ED_leg	No	No	No	No
Mcal_887	G232G8W04JVL3A_leg	No	No	No	No
Mcal_888	G232G8W04JVP4U_leg	Yes	No	No	No
Mcal_889	G232G8W04JVSFU_leg	No	No	No	No
Mcal_890	G232G8W04JWBO5_leg	No	Yes	No	Yes
Mcal_891	G232G8W04JWIRR_leg	No	No	No	No
Mcal_892	G232G8W04JWSIN_leg	No	No	No	No
Mcal_893	G232G8W04JWT90_leg	No	No	No	No
Mcal_894	G232G8W04JWVJR_leg	No	No	No	No
Mcal_895	G232G8W04JX0LQ_leg	No	No	No	No
Mcal_896	G232G8W04JX3KJ_leg	No	No	No	No
Mcal_897	G232G8W04JX6XD_leg	No	No	No	No
Mcal_898	G232G8W04JX9K4_leg	No	No	No	No
Mcal_899	G232G8W04JXHER_leg	No	No	No	No
Mcal_900	G232G8W04JXM01_leg	No	No	No	No
Mcal_901	G232G8W04JXNS2_leg	No	No	No	No
Mcal_902	G232G8W04JXTZ6_leg	No	No	No	No
Mcal_903	G232G8W04JY5ER_leg	No	Yes	No	No
Mcal_904	G232G8W04JY7NP_leg	No	No	No	No
Mcal_905	G232G8W04JYH4Z_leg	No	No	No	No
Mcal_906	G232G8W04JYKRC_leg	No	No	No	No
Mcal_907	G232G8W04JYLJF_leg	No	No	No	No
Mcal_908	G232G8W04JYQWZ_leg	Yes	No	No	Yes
Mcal_909	G232G8W04JZ87B_leg	No	No	No	No
Mcal_910	G232G8W04JZAVI_leg	No	No	No	No
Mcal_911	G232G8W04JZDJ2_leg	Yes	Yes	Yes	Yes
Mcal_912	G232G8W04JZEIV_leg	No	No	No	No
Mcal_913	G232G8W04JZEJL_leg	No	No	No	No
Mcal_914	G232G8W04JZGIP_leg	No	No	No	No
Mcal_915	G232G8W04JZRQ2_leg	No	No	No	No
Mcal_916	G232G8W04JZW0O_leg	No	No	No	No
Mcal_917	G232G8W04JZW78_leg	No	No	No	No
Mcal_918	G232G8W04JZWK3_leg	No	No	No	No
Mcal_919	G232G8W04JZWUD_leg	No	No	No	No
Mcal_920	contig00083	No	Yes	No	Yes
Mcal_921	isotig00162	No	Yes	No	Yes
Mcal_922	isotig00227	No	No	No	No
Mcal_923	isotig00236	No	No	No	No
Mcal_924	isotig00254	No	No	No	No
Mcal_925	isotig00281	No	No	No	No
Mcal_926	isotig00334	No	No	No	No
Mcal_927	isotig00379	Yes	Yes	Yes	Yes
Mcal_928	isotig00402	No	No	No	No
Mcal_929	isotig00403	No	No	No	No
Mcal_930	isotig00428	No	No	No	No
Mcal_931	isotig00429	No	No	No	No
Mcal_932	isotig00449	Yes	No	No	No
Mcal_933	isotig00489	No	No	No	No
Mcal_934	isotig00495	No	Yes	No	Yes
Mcal_935	isotig00499	No	No	No	No
Mcal_936	isotig00515	No	No	No	No
Mcal_937	isotig00539	No	No	No	No
Mcal_938	isotig00561	No	No	No	No
Mcal_939	isotig00569	No	No	No	No
Mcal_940	isotig00574	Yes	No	No	No
Mcal_941	isotig00580	No	No	No	No
Mcal_942	isotig00588	No	No	No	No
Mcal_943	isotig00659	No	No	No	No
Mcal_944	isotig00669	Yes	Yes	Yes	Yes
Mcal_945	isotig00682	No	No	No	No
Mcal_946	isotig00684	No	Yes	No	No
Mcal_947	isotig00705	No	Yes	No	No
Mcal_948	isotig00709	No	No	No	No
Mcal_949	isotig00719	No	No	No	No
Mcal_950	isotig00780	Yes	Yes	Yes	No
Mcal_951	isotig00784	No	No	No	No
Mcal_952	isotig00785	No	No	No	No
Mcal_953	isotig00787	No	No	No	No
Mcal_954	isotig00791	Yes	Yes	Yes	Yes
Mcal_955	isotig00798	No	No	No	No
Mcal_956	isotig00862	No	No	No	No
Mcal_957	isotig00872	No	No	No	No
Mcal_958	isotig00879	No	No	No	No
Mcal_959	isotig00893	Yes	Yes	Yes	No
Mcal_960	isotig00897	No	Yes	No	No
Mcal_961	isotig00917	No	No	No	No
Mcal_962	isotig00944	No	Yes	No	No
Mcal_963	isotig00958	No	No	No	No
Mcal_964	isotig00964	No	No	No	No
Mcal_965	isotig00975	No	Yes	No	No
Mcal_966	isotig00993	No	Yes	No	No
Mcal_967	isotig01034	No	No	No	No
Mcal_968	isotig01042	No	No	No	No
Mcal_969	isotig01053	No	No	No	No
Mcal_970	isotig01058	No	No	No	No
Mcal_971	isotig01075	Yes	Yes	Yes	Yes
Mcal_972	isotig01079	Yes	Yes	Yes	Yes
Mcal_973	isotig01094	Yes	Yes	Yes	No
Mcal_974	isotig01126	Yes	Yes	Yes	No
Mcal_975	isotig01165	Yes	Yes	Yes	No
Mcal_976	isotig01181	No	No	No	No
Mcal_977	isotig01191	Yes	Yes	Yes	Yes
Mcal_978	isotig01202	No	No	No	No
Mcal_979	isotig01225	No	No	No	No
Mcal_980	isotig01233	No	Yes	No	No
Mcal_981	isotig01238	No	No	No	No
Mcal_982	isotig01245	No	No	No	No
Mcal_983	isotig01288	No	No	No	No
Mcal_984	isotig01314	No	No	No	No
Mcal_985	isotig01333	Yes	Yes	Yes	No
Mcal_986	isotig01341	No	No	No	Yes
Mcal_987	isotig01343	No	Yes	No	Yes
Mcal_988	isotig01345	No	No	No	No
Mcal_989	isotig01347	No	No	No	No
Mcal_990	isotig01353	No	No	No	No
Mcal_991	isotig01362	No	No	No	No
Mcal_992	isotig01367	No	Yes	No	No
Mcal_993	isotig01369	No	No	No	No
Mcal_994	isotig01374	No	No	No	No
Mcal_995	isotig01376	No	No	No	No
Mcal_996	isotig01402	No	No	No	No
Mcal_997	isotig01409	No	No	No	No
Mcal_998	isotig01412	No	No	No	No
Mcal_999	isotig01417	No	No	No	No
Mcal_1000	isotig01418	No	Yes	No	No
Mcal_1001	isotig01445	No	No	No	No
Mcal_1002	isotig01453	No	No	No	No
Mcal_1003	isotig01456	No	No	No	No
Mcal_1004	isotig01459	No	No	No	No
Mcal_1005	isotig01480	Yes	Yes	Yes	Yes
Mcal_1006	isotig01484	No	No	No	No
Mcal_1007	isotig01493	No	No	No	No
Mcal_1008	isotig01506	Yes	No	No	No
Mcal_1009	isotig01507	No	No	No	No
Mcal_1010	isotig01511	No	No	No	No
Mcal_1011	isotig01528	No	No	No	No
Mcal_1012	isotig01532	No	No	No	No
Mcal_1013	isotig01536	No	No	No	No
Mcal_1014	isotig01567	No	No	No	No
Mcal_1015	isotig01589	Yes	Yes	Yes	Yes
Mcal_1016	isotig01596	No	No	No	No
Mcal_1017	isotig01601	Yes	No	No	No
Mcal_1018	isotig01606	Yes	Yes	Yes	Yes
Mcal_1019	isotig01656	No	No	No	No
Mcal_1020	isotig01662	Yes	Yes	Yes	Yes
Mcal_1021	isotig01671	No	No	No	No
Mcal_1022	isotig01676	No	No	No	No
Mcal_1023	isotig01678	No	No	No	No
Mcal_1024	isotig01681	Yes	No	No	No
Mcal_1025	isotig01701	No	No	No	No
Mcal_1026	isotig01702	No	No	No	No
Mcal_1027	isotig01715	No	No	No	No
Mcal_1028	isotig01739	No	No	No	No
Mcal_1029	isotig01740	No	No	No	No
Mcal_1030	isotig01754	No	No	No	No
Mcal_1031	isotig01765	No	No	No	No
Mcal_1032	isotig01775	No	No	No	No
Mcal_1033	isotig01777	No	No	No	No
Mcal_1034	isotig01781	Yes	Yes	Yes	Yes
Mcal_1035	isotig01782	Yes	Yes	Yes	Yes
Mcal_1036	isotig01791	No	No	No	No
Mcal_1037	isotig01794	No	No	No	No
Mcal_1038	isotig01800	No	Yes	No	No
Mcal_1039	isotig01821	No	No	No	No
Mcal_1040	isotig01823	No	No	No	No
Mcal_1041	isotig01824	No	No	No	No
Mcal_1042	isotig01828	No	No	No	No
Mcal_1043	isotig01834	Yes	Yes	Yes	No
Mcal_1044	isotig01835	No	No	No	No
Mcal_1045	isotig01836	No	No	No	No
Mcal_1046	isotig01844	No	No	No	No
Mcal_1047	isotig01845	No	No	No	No
Mcal_1048	isotig01852	No	No	No	No
Mcal_1049	isotig01858	No	No	No	No
Mcal_1050	isotig01859	No	No	No	No
Mcal_1051	isotig01861	No	No	No	No
Mcal_1052	isotig01866	No	No	No	No
Mcal_1053	isotig01870	No	Yes	No	No
Mcal_1054	isotig01885	No	No	No	No
Mcal_1055	isotig01886	No	Yes	No	No
Mcal_1056	isotig01894	No	No	No	No
Mcal_1057	isotig01896	No	No	No	No
Mcal_1058	isotig01901	No	No	No	No
Mcal_1059	isotig01906	No	No	No	No
Mcal_1060	isotig01907	No	No	No	No
Mcal_1061	isotig01912	No	No	No	No
Mcal_1062	isotig01913	No	Yes	No	No
Mcal_1063	isotig01914	No	No	No	No
Mcal_1064	isotig01921	No	No	No	No
Mcal_1065	isotig01927	No	No	No	No
Mcal_1066	isotig01928	No	No	No	No
Mcal_1067	isotig01933	No	No	No	No
Mcal_1068	isotig01934	No	No	No	No
Mcal_1069	isotig01950	No	No	No	No
Mcal_1070	isotig01954	No	No	No	No
Mcal_1071	isotig01965	No	Yes	No	No
Mcal_1072	isotig01975	No	No	No	No
Mcal_1073	isotig01981	No	Yes	No	Yes
Mcal_1074	isotig01989	No	No	No	No
Mcal_1075	isotig01992	Yes	Yes	Yes	No
Mcal_1076	isotig01994	No	No	No	No
Mcal_1077	isotig01996	No	No	No	No
Mcal_1078	isotig01997	No	No	No	No
Mcal_1079	isotig02000	No	No	No	No
Mcal_1080	isotig02008	No	No	No	No
Mcal_1081	isotig02011	Yes	Yes	Yes	Yes
Mcal_1082	isotig02012	No	No	No	No
Mcal_1083	isotig02014	No	Yes	No	No
Mcal_1084	isotig02018	No	No	No	No
Mcal_1085	isotig02027	No	No	No	No
Mcal_1086	isotig02028	No	No	No	No
Mcal_1087	isotig02038	Yes	No	No	No
Mcal_1088	isotig02045	No	No	No	No
Mcal_1089	isotig02053	Yes	Yes	Yes	Yes
Mcal_1090	isotig02057	No	Yes	No	No
Mcal_1091	isotig02060	No	No	No	No
Mcal_1092	isotig02063	Yes	No	No	No
Mcal_1093	isotig02064	No	No	No	No
Mcal_1094	isotig02067	No	No	No	No
Mcal_1095	isotig02074	No	No	No	No
Mcal_1096	isotig02086	No	No	No	No
Mcal_1097	isotig02087	No	No	No	No
Mcal_1098	isotig02088	Yes	Yes	Yes	Yes
Mcal_1099	isotig02090	Yes	No	No	No
Mcal_1100	isotig02091	Yes	No	No	No
Mcal_1101	isotig02092	No	No	No	No
Mcal_1102	isotig02094	Yes	Yes	Yes	No
Mcal_1103	isotig02100	No	Yes	No	No
Mcal_1104	isotig02115	No	No	No	No
Mcal_1105	isotig02117	No	No	No	No
Mcal_1106	isotig02124	No	No	No	No
Mcal_1107	isotig02129	No	No	No	No
Mcal_1108	isotig02131	No	No	No	No
Mcal_1109	isotig02132	No	No	No	No
Mcal_1110	isotig02134	No	No	No	No
Mcal_1111	isotig02136	No	No	No	No
Mcal_1112	isotig02139	Yes	Yes	Yes	No
Mcal_1113	isotig02144	No	No	No	No
Mcal_1114	isotig02145	No	No	No	No
Mcal_1115	isotig02154	Yes	Yes	Yes	No
Mcal_1116	isotig02159	No	No	No	No
Mcal_1117	isotig02160	No	No	No	No
Mcal_1118	isotig02161	No	No	No	No
Mcal_1119	isotig02169	No	No	No	No
Mcal_1120	isotig02174	No	Yes	No	No
Mcal_1121	isotig02176	No	No	No	No
Mcal_1122	isotig02196	No	No	No	No
Mcal_1123	isotig02197	No	Yes	No	Yes
Mcal_1124	isotig02199	No	No	No	No
Mcal_1125	isotig02204	Yes	Yes	Yes	No
Mcal_1126	isotig02209	Yes	Yes	Yes	No
Mcal_1127	isotig02210	No	No	No	No
Mcal_1128	isotig02213	No	No	No	No
Mcal_1129	isotig02215	No	Yes	No	No
Mcal_1130	isotig02219	No	No	No	No
Mcal_1131	isotig02232	No	Yes	No	No
Mcal_1132	isotig02235	No	No	No	No
Mcal_1133	isotig02244	No	Yes	No	No
Mcal_1134	isotig02245	No	Yes	No	No
Mcal_1135	isotig02248	No	No	No	No
Mcal_1136	isotig02251	No	No	No	No
Mcal_1137	isotig02263	No	No	No	No
Mcal_1138	isotig02279	Yes	Yes	Yes	No
Mcal_1139	isotig02281	No	No	No	No
Mcal_1140	isotig02286	No	No	No	No
Mcal_1141	isotig02289	No	No	No	No
Mcal_1142	isotig02301	No	No	No	No
Mcal_1143	isotig02305	No	Yes	No	No
Mcal_1144	isotig02307	No	No	No	No
Mcal_1145	isotig02312	No	No	No	No
Mcal_1146	isotig02313	No	No	No	No
Mcal_1147	isotig02314	No	Yes	No	No
Mcal_1148	isotig02321	No	Yes	No	No
Mcal_1149	isotig02322	Yes	Yes	Yes	No
Mcal_1150	isotig02324	No	Yes	No	No
Mcal_1151	isotig02326	No	No	No	No
Mcal_1152	isotig02327	No	Yes	No	No
Mcal_1153	isotig02335	No	No	No	No
Mcal_1154	isotig02338	No	No	No	No
Mcal_1155	isotig02346	No	Yes	No	Yes
Mcal_1156	isotig02348	No	No	No	No
Mcal_1157	isotig02352	No	No	No	No
Mcal_1158	isotig02355	No	No	No	Yes
Mcal_1159	isotig02360	No	Yes	No	No
Mcal_1160	isotig02372	No	No	No	No
Mcal_1161	isotig02380	No	No	No	No
Mcal_1162	isotig02382	No	No	No	No
Mcal_1163	isotig02383	No	No	No	No
Mcal_1164	isotig02387	Yes	Yes	Yes	No
Mcal_1165	isotig02399	No	No	No	No
Mcal_1166	isotig02411	No	No	No	No
Mcal_1167	isotig02413	No	No	No	No
Mcal_1168	isotig02417	No	No	No	No
Mcal_1169	isotig02429	No	No	No	No
Mcal_1170	isotig02437	No	No	No	No
Mcal_1171	isotig02439	No	No	No	No
Mcal_1172	isotig02443	No	No	No	No
Mcal_1173	isotig02451	No	No	No	No
Mcal_1174	isotig02457	No	Yes	No	Yes
Mcal_1175	isotig02458	No	No	No	No
Mcal_1176	isotig02468	No	No	No	No
Mcal_1177	isotig02484	No	No	No	No
Mcal_1178	isotig02490	No	No	No	No
Mcal_1179	isotig02491	No	No	No	No
Mcal_1180	isotig02496	Yes	Yes	Yes	Yes
Mcal_1181	isotig02497	No	No	No	No
Mcal_1182	isotig02499	No	No	No	No
Mcal_1183	isotig02515	No	No	No	No
Mcal_1184	isotig02516	No	No	No	No
Mcal_1185	isotig02518	Yes	Yes	Yes	No
Mcal_1186	isotig02523	No	No	No	No
Mcal_1187	isotig02530	No	No	No	No
Mcal_1188	isotig02534	No	No	No	No
Mcal_1189	isotig02536	No	No	No	No
Mcal_1190	isotig02541	No	No	No	No
Mcal_1191	isotig02544	No	No	No	No
Mcal_1192	isotig02545	No	Yes	No	No
Mcal_1193	isotig02548	No	Yes	No	No
Mcal_1194	isotig02555	No	No	No	No
Mcal_1195	isotig02560	Yes	Yes	Yes	No
Mcal_1196	isotig02571	No	Yes	No	Yes
Mcal_1197	isotig02573	No	No	No	No
Mcal_1198	isotig02576	No	No	No	No
Mcal_1199	isotig02580	No	No	No	No
Mcal_1200	isotig02583	No	No	No	No
Mcal_1201	isotig02599	No	No	No	No
Mcal_1202	isotig02609	No	No	No	No
Mcal_1203	isotig02611	No	No	No	No
Mcal_1204	isotig02629	No	Yes	No	No
Mcal_1205	isotig02631	No	No	No	No
Mcal_1206	isotig02635	No	No	No	No
Mcal_1207	isotig02637	Yes	Yes	Yes	Yes
Mcal_1208	isotig02645	No	No	No	No
Mcal_1209	isotig02651	Yes	No	No	No
Mcal_1210	isotig02653	No	No	No	No
Mcal_1211	isotig02654	No	No	No	No
Mcal_1212	isotig02655	Yes	No	No	No
Mcal_1213	isotig02658	No	No	No	No
Mcal_1214	isotig02659	No	No	No	No
Mcal_1215	isotig02663	No	No	No	No
Mcal_1216	isotig02664	No	No	No	No
Mcal_1217	isotig02687	No	No	No	No
Mcal_1218	isotig02704	No	No	No	No
Mcal_1219	isotig02709	Yes	Yes	Yes	Yes
Mcal_1220	isotig02710	No	No	No	No
Mcal_1221	isotig02711	No	No	No	No
Mcal_1222	isotig02712	No	No	No	No
Mcal_1223	isotig02715	Yes	No	No	No
Mcal_1224	isotig02721	No	No	No	No
Mcal_1225	isotig02732	No	No	No	No
Mcal_1226	isotig02733	No	No	No	No
Mcal_1227	isotig02736	Yes	Yes	Yes	Yes
Mcal_1228	isotig02739	No	No	No	No
Mcal_1229	isotig02751	Yes	Yes	Yes	No
Mcal_1230	isotig02754	No	No	No	No
Mcal_1231	isotig02757	No	No	No	No
Mcal_1232	isotig02760	No	No	No	No
Mcal_1233	isotig02761	No	Yes	No	Yes
Mcal_1234	isotig02765	No	No	No	No
Mcal_1235	isotig02767	No	Yes	No	No
Mcal_1236	isotig02775	Yes	No	No	No
Mcal_1237	isotig02776	No	No	No	No
Mcal_1238	isotig02780	No	No	No	No
Mcal_1239	isotig02782	No	No	No	No
Mcal_1240	isotig02783	No	No	No	No
Mcal_1241	isotig02785	No	No	No	No
Mcal_1242	isotig02787	Yes	No	No	No
Mcal_1243	isotig02791	No	No	No	No
Mcal_1244	isotig02799	No	Yes	No	Yes
Mcal_1245	isotig02801	No	No	No	No
Mcal_1246	isotig02803	No	No	No	No
Mcal_1247	isotig02805	No	No	No	No
Mcal_1248	isotig02807	No	No	No	No
Mcal_1249	isotig02808	No	No	No	No
Mcal_1250	isotig02830	Yes	Yes	Yes	No
Mcal_1251	isotig02837	No	No	No	No
Mcal_1252	isotig02845	No	No	No	No
Mcal_1253	isotig02847	No	No	No	No
Mcal_1254	isotig02849	No	No	No	No
Mcal_1255	isotig02860	No	No	No	No
Mcal_1256	isotig02870	No	No	No	No
Mcal_1257	isotig02877	No	Yes	No	No
Mcal_1258	isotig02884	No	No	No	No
Mcal_1259	isotig02894	No	No	No	No
Mcal_1260	isotig02899	No	Yes	No	Yes
Mcal_1261	isotig02902	No	No	No	No
Mcal_1262	isotig02910	No	No	No	No
Mcal_1263	isotig02913	No	No	No	No
Mcal_1264	isotig02917	No	No	No	No
Mcal_1265	isotig02919	No	No	No	No
Mcal_1266	isotig02924	No	No	No	No
Mcal_1267	isotig02926	No	No	No	No
Mcal_1268	isotig02931	No	No	No	No
Mcal_1269	isotig02936	No	No	No	No
Mcal_1270	isotig02946	No	No	No	No
Mcal_1271	isotig02947	No	No	No	No
Mcal_1272	isotig02949	No	No	No	No
Mcal_1273	isotig02951	No	No	No	No
Mcal_1274	isotig02964	No	No	No	No
Mcal_1275	isotig02965	No	No	No	No
Mcal_1276	isotig02968	No	No	No	No
Mcal_1277	isotig02976	No	No	No	No
Mcal_1278	isotig02978	Yes	Yes	Yes	No
Mcal_1279	isotig02980	No	No	No	No
Mcal_1280	isotig02983	No	No	No	No
Mcal_1281	isotig02986	No	No	No	No
Mcal_1282	isotig03000	No	No	No	No
Mcal_1283	isotig03001	Yes	Yes	Yes	Yes
Mcal_1284	isotig03010	No	No	No	No
Mcal_1285	isotig03016	No	No	No	No
Mcal_1286	isotig03027	No	No	No	No
Mcal_1287	isotig03031	No	No	No	No
Mcal_1288	isotig03032	No	No	No	No
Mcal_1289	isotig03040	Yes	Yes	Yes	Yes
Mcal_1290	isotig03048	No	No	No	No
Mcal_1291	isotig03057	No	No	No	No
Mcal_1292	isotig03058	No	No	No	No
Mcal_1293	isotig03067	No	No	No	No
Mcal_1294	isotig03069	No	Yes	No	Yes
Mcal_1295	isotig03075	No	No	No	No
Mcal_1296	isotig03086	No	No	No	No
Mcal_1297	isotig03088	No	No	No	No
Mcal_1298	isotig03094	No	No	No	Yes
Mcal_1299	isotig03096	No	No	No	No
Mcal_1300	isotig03098	No	No	No	No
Mcal_1301	isotig03110	No	No	No	No
Mcal_1302	isotig03112	No	No	No	No
Mcal_1303	isotig03113	Yes	Yes	Yes	Yes
Mcal_1304	isotig03123	No	No	No	No
Mcal_1305	isotig03126	Yes	Yes	Yes	Yes
Mcal_1306	isotig03134	No	No	No	No
Mcal_1307	isotig03135	No	No	No	No
Mcal_1308	isotig03147	No	No	No	No
Mcal_1309	isotig03154	No	No	No	No
Mcal_1310	isotig03156	No	No	No	No
Mcal_1311	isotig03160	No	Yes	No	No
Mcal_1312	isotig03162	No	No	No	No
Mcal_1313	isotig03167	No	No	No	No
Mcal_1314	isotig03168	No	Yes	No	No
Mcal_1315	isotig03191	No	No	No	No
Mcal_1316	isotig03193	No	No	No	No
Mcal_1317	isotig03195	No	No	No	No
Mcal_1318	isotig03196	Yes	No	No	Yes
Mcal_1319	isotig03199	No	No	No	No
Mcal_1320	isotig03205	No	No	No	No
Mcal_1321	isotig03211	Yes	Yes	Yes	No
Mcal_1322	isotig03221	No	No	No	No
Mcal_1323	isotig03230	No	No	No	No
Mcal_1324	isotig03247	Yes	Yes	Yes	No
Mcal_1325	isotig03257	No	No	No	No
Mcal_1326	isotig03259	No	No	No	No
Mcal_1327	isotig03270	No	No	No	No
Mcal_1328	isotig03272	No	Yes	No	No
Mcal_1329	isotig03278	No	Yes	No	No
Mcal_1330	isotig03282	No	No	No	No
Mcal_1331	isotig03284	No	No	No	No
Mcal_1332	isotig03292	No	No	No	No
Mcal_1333	isotig03296	No	No	No	No
Mcal_1334	isotig03316	No	No	No	No
Mcal_1335	isotig03325	No	Yes	No	No
Mcal_1336	isotig03329	No	No	No	No
Mcal_1337	isotig03334	No	Yes	No	No
Mcal_1338	isotig03345	No	No	No	No
Mcal_1339	isotig03367	Yes	Yes	Yes	No
Mcal_1340	isotig03370	No	No	No	No
Mcal_1341	isotig03371	No	No	No	No
Mcal_1342	isotig03373	No	No	No	No
Mcal_1343	isotig03383	No	No	No	No
Mcal_1344	isotig03386	No	No	No	No
Mcal_1345	isotig03387	Yes	Yes	Yes	Yes
Mcal_1346	isotig03388	No	No	No	No
Mcal_1347	isotig03389	No	No	No	No
Mcal_1348	isotig03402	No	No	No	No
Mcal_1349	isotig03420	No	No	No	No
Mcal_1350	isotig03423	No	No	No	No
Mcal_1351	isotig03437	No	No	No	No
Mcal_1352	isotig03440	No	No	No	No
Mcal_1353	isotig03450	Yes	No	No	No
Mcal_1354	isotig03460	No	No	No	No
Mcal_1355	isotig03473	Yes	Yes	Yes	No
Mcal_1356	isotig03474	No	No	No	No
Mcal_1357	isotig03493	No	No	No	No
Mcal_1358	isotig03498	No	Yes	No	No
Mcal_1359	isotig03508	No	No	No	No
Mcal_1360	isotig03510	No	No	No	No
Mcal_1361	isotig03518	No	No	No	No
Mcal_1362	isotig03534	No	No	No	No
Mcal_1363	isotig03542	No	No	No	No
Mcal_1364	isotig03544	No	No	No	No
Mcal_1365	isotig03546	No	No	No	No
Mcal_1366	isotig03548	No	No	No	No
Mcal_1367	isotig03553	No	No	No	No
Mcal_1368	isotig03570	No	No	No	No
Mcal_1369	isotig03571	No	No	No	No
Mcal_1370	isotig03575	No	No	No	No
Mcal_1371	isotig03594	No	No	No	No
Mcal_1372	isotig03600	No	No	No	No
Mcal_1373	Contig319.Newo100p95.cap3o60p95	No	No	No	No
Mcal_1374	Contig330.Newo100p95.cap3o60p95	No	No	No	No
Mcal_1375	Contig451.Newo100p95.cap3o60p95	No	Yes	No	No
Mcal_1376	Contig48.Newo100p95.cap3o60p95	Yes	Yes	Yes	Yes
Mcal_1377	Contig591.Newo100p95.cap3o60p95	No	No	No	No
Mcal_1378	Contig638.Newo100p95.cap3o60p95	No	No	No	No
Mcal_1379	Contig653.Newo100p95.cap3o60p95	No	Yes	No	No
Mcal_1380	Contig665.Newo100p95.cap3o60p95	No	No	No	No
Mcal_1381	Contig693.Newo100p95.cap3o60p95	No	No	No	No
Mcal_1382	isotig00452	Yes	Yes	Yes	No
Mcal_1383	isotig00575	Yes	No	No	No
Mcal_1384	isotig00579	No	No	No	No
Mcal_1385	isotig00646	Yes	Yes	Yes	Yes
Mcal_1386	isotig00666	Yes	Yes	Yes	No
Mcal_1387	isotig00685	Yes	Yes	Yes	Yes
Mcal_1388	isotig00720	Yes	Yes	Yes	No
Mcal_1389	isotig00782	Yes	No	No	No
Mcal_1390	isotig00828	No	Yes	No	Yes
Mcal_1391	isotig00901	No	Yes	No	No
Mcal_1392	isotig00943	Yes	Yes	Yes	No
Mcal_1393	isotig00987	No	No	No	No
Mcal_1394	isotig01030	No	Yes	No	No
Mcal_1395	isotig01032	Yes	Yes	Yes	Yes
Mcal_1396	isotig01185	No	No	No	Yes
Mcal_1397	isotig01207	Yes	Yes	Yes	No
Mcal_1398	isotig01251	Yes	Yes	Yes	No
Mcal_1399	isotig01275	Yes	Yes	Yes	Yes
Mcal_1400	isotig01316	Yes	Yes	Yes	No
Mcal_1401	isotig01363	No	Yes	No	Yes
Mcal_1402	isotig01426	Yes	Yes	Yes	Yes
Mcal_1403	isotig01448	No	No	No	No
Mcal_1404	isotig01461	No	Yes	No	No
Mcal_1405	isotig01491	Yes	No	No	No
Mcal_1406	isotig01613	No	No	No	No
Mcal_1407	isotig01644	No	Yes	No	Yes
Mcal_1408	isotig01670	No	No	No	No
Mcal_1409	isotig01691	No	No	No	No
Mcal_1410	isotig01706	No	No	No	No
Mcal_1411	isotig01714	No	No	No	No
Mcal_1412	isotig01749	Yes	Yes	Yes	Yes
Mcal_1413	isotig01854	No	No	No	No
Mcal_1414	isotig01983	No	No	No	No
Mcal_1415	isotig02061	No	Yes	No	No
Mcal_1416	isotig02135	No	No	No	No
Mcal_1417	isotig02200	No	No	No	No
Mcal_1418	isotig02296	Yes	Yes	Yes	No
Mcal_1419	isotig02350	No	Yes	No	No
Mcal_1420	isotig02432	No	No	No	No
Mcal_1421	isotig02487	No	No	No	No
Mcal_1422	isotig02598	Yes	Yes	Yes	No
Mcal_1423	isotig02618	No	No	No	No
Mcal_1424	isotig02669	Yes	No	No	No
Mcal_1425	isotig02670	No	Yes	No	No
Mcal_1426	isotig02798	Yes	Yes	Yes	Yes
Mcal_1427	isotig02852	No	No	No	No
Mcal_1428	isotig03043	No	Yes	No	Yes
Mcal_1429	isotig03092	No	No	No	No
Mcal_1430	isotig03276	No	No	No	No
Mcal_1431	isotig03408	No	No	No	No
Mcal_1432	isotig03563	No	No	No	No
Mcal_1433	Contig1.Newo100p95.cap3o60p95	No	No	No	No
Mcal_1434	Contig1000.Newo100p95.cap3o60p95	No	No	No	No
Mcal_1435	Contig1001.Newo100p95.cap3o60p95	No	No	No	Yes
Mcal_1436	Contig1003.Newo100p95.cap3o60p95	No	No	No	No
Mcal_1437	Contig1005.Newo100p95.cap3o60p95	No	No	No	No
Mcal_1438	Contig1006.Newo100p95.cap3o60p95	No	No	No	No
Mcal_1439	Contig1012.Newo100p95.cap3o60p95	No	No	No	No
Mcal_1440	Contig1013.Newo100p95.cap3o60p95	No	No	No	No
Mcal_1441	Contig1015.Newo100p95.cap3o60p95	No	No	No	No
Mcal_1442	Contig1017.Newo100p95.cap3o60p95	Yes	Yes	Yes	No
Mcal_1443	Contig1018.Newo100p95.cap3o60p95	Yes	Yes	Yes	Yes
Mcal_1444	Contig1022.Newo100p95.cap3o60p95	No	No	No	No
Mcal_1445	Contig1023.Newo100p95.cap3o60p95	No	No	No	No
Mcal_1446	Contig1024.Newo100p95.cap3o60p95	No	No	No	No
Mcal_1447	Contig1027.Newo100p95.cap3o60p95	No	No	No	No
Mcal_1448	Contig103.Newo100p95.cap3o60p95	Yes	No	No	No
Mcal_1449	Contig1033.Newo100p95.cap3o60p95	No	No	No	No
Mcal_1450	Contig1039.Newo100p95.cap3o60p95	No	No	No	No
Mcal_1451	Contig104.Newo100p95.cap3o60p95	No	No	No	No
Mcal_1452	Contig106.Newo100p95.cap3o60p95	Yes	Yes	Yes	Yes
Mcal_1453	Contig110.Newo100p95.cap3o60p95	Yes	Yes	Yes	No
Mcal_1454	Contig113.Newo100p95.cap3o60p95	No	No	No	No
Mcal_1455	Contig117.Newo100p95.cap3o60p95	No	Yes	No	No
Mcal_1456	Contig119.Newo100p95.cap3o60p95	No	Yes	No	No
Mcal_1457	Contig122.Newo100p95.cap3o60p95	No	No	No	No
Mcal_1458	Contig123.Newo100p95.cap3o60p95	No	No	No	No
Mcal_1459	Contig124.Newo100p95.cap3o60p95	Yes	Yes	Yes	No
Mcal_1460	Contig126.Newo100p95.cap3o60p95	No	No	No	No
Mcal_1461	Contig127.Newo100p95.cap3o60p95	No	No	No	No
Mcal_1462	Contig128.Newo100p95.cap3o60p95	Yes	Yes	Yes	Yes
Mcal_1463	Contig129.Newo100p95.cap3o60p95	No	Yes	No	No
Mcal_1464	Contig130.Newo100p95.cap3o60p95	No	Yes	No	No
Mcal_1465	Contig131.Newo100p95.cap3o60p95	No	No	No	No
Mcal_1466	Contig132.Newo100p95.cap3o60p95	No	No	No	No
Mcal_1467	Contig135.Newo100p95.cap3o60p95	No	No	No	No
Mcal_1468	Contig137.Newo100p95.cap3o60p95	No	No	No	No
Mcal_1469	Contig138.Newo100p95.cap3o60p95	No	No	No	No
Mcal_1470	Contig139.Newo100p95.cap3o60p95	Yes	Yes	Yes	No
Mcal_1471	Contig142.Newo100p95.cap3o60p95	Yes	Yes	Yes	Yes
Mcal_1472	Contig143.Newo100p95.cap3o60p95	No	No	No	No
Mcal_1473	Contig149.Newo100p95.cap3o60p95	Yes	Yes	Yes	No
Mcal_1474	Contig150.Newo100p95.cap3o60p95	Yes	Yes	Yes	No
Mcal_1475	Contig157.Newo100p95.cap3o60p95	No	Yes	No	No
Mcal_1476	Contig158.Newo100p95.cap3o60p95	No	No	No	No
Mcal_1477	Contig159.Newo100p95.cap3o60p95	No	Yes	No	No
Mcal_1478	Contig160.Newo100p95.cap3o60p95	No	Yes	No	No
Mcal_1479	Contig161.Newo100p95.cap3o60p95	No	No	No	No
Mcal_1480	Contig162.Newo100p95.cap3o60p95	No	No	No	No
Mcal_1481	Contig164.Newo100p95.cap3o60p95	No	No	No	No
Mcal_1482	Contig165.Newo100p95.cap3o60p95	Yes	Yes	Yes	Yes
Mcal_1483	Contig171.Newo100p95.cap3o60p95	Yes	Yes	Yes	Yes
Mcal_1484	Contig176.Newo100p95.cap3o60p95	No	Yes	No	No
Mcal_1485	Contig177.Newo100p95.cap3o60p95	No	No	No	No
Mcal_1486	Contig183.Newo100p95.cap3o60p95	No	No	No	No
Mcal_1487	Contig185.Newo100p95.cap3o60p95	No	Yes	No	No
Mcal_1488	Contig186.Newo100p95.cap3o60p95	No	No	No	No
Mcal_1489	Contig187.Newo100p95.cap3o60p95	No	No	No	No
Mcal_1490	Contig188.Newo100p95.cap3o60p95	No	No	No	No
Mcal_1491	Contig190.Newo100p95.cap3o60p95	No	No	No	No
Mcal_1492	Contig193.Newo100p95.cap3o60p95	No	No	No	No
Mcal_1493	Contig196.Newo100p95.cap3o60p95	No	Yes	No	No
Mcal_1494	Contig197.Newo100p95.cap3o60p95	Yes	Yes	Yes	Yes
Mcal_1495	Contig198.Newo100p95.cap3o60p95	No	Yes	No	Yes
Mcal_1496	Contig204.Newo100p95.cap3o60p95	No	No	No	No
Mcal_1497	Contig206.Newo100p95.cap3o60p95	No	No	No	No
Mcal_1498	Contig207.Newo100p95.cap3o60p95	Yes	Yes	Yes	Yes
Mcal_1499	Contig208.Newo100p95.cap3o60p95	No	No	No	No
Mcal_1500	Contig210.Newo100p95.cap3o60p95	No	No	No	Yes
Mcal_1501	Contig212.Newo100p95.cap3o60p95	No	No	No	No
Mcal_1502	Contig215.Newo100p95.cap3o60p95	No	Yes	No	No
Mcal_1503	Contig217.Newo100p95.cap3o60p95	Yes	Yes	Yes	Yes
Mcal_1504	Contig220.Newo100p95.cap3o60p95	No	Yes	No	No
Mcal_1505	Contig221.Newo100p95.cap3o60p95	Yes	Yes	Yes	No
Mcal_1506	Contig226.Newo100p95.cap3o60p95	Yes	No	No	No
Mcal_1507	Contig228.Newo100p95.cap3o60p95	No	No	No	No
Mcal_1508	Contig229.Newo100p95.cap3o60p95	No	No	No	No
Mcal_1509	Contig230.Newo100p95.cap3o60p95	Yes	Yes	Yes	Yes
Mcal_1510	Contig231.Newo100p95.cap3o60p95	Yes	No	No	No
Mcal_1511	Contig232.Newo100p95.cap3o60p95	No	No	No	No
Mcal_1512	Contig233.Newo100p95.cap3o60p95	No	No	No	No
Mcal_1513	Contig234.Newo100p95.cap3o60p95	Yes	Yes	Yes	No
Mcal_1514	Contig235.Newo100p95.cap3o60p95	No	No	No	No
Mcal_1515	Contig236.Newo100p95.cap3o60p95	Yes	Yes	Yes	Yes
Mcal_1516	Contig237.Newo100p95.cap3o60p95	No	No	No	No
Mcal_1517	Contig240.Newo100p95.cap3o60p95	Yes	Yes	Yes	Yes
Mcal_1518	Contig243.Newo100p95.cap3o60p95	No	No	No	No
Mcal_1519	Contig244.Newo100p95.cap3o60p95	Yes	Yes	Yes	No
Mcal_1520	Contig245.Newo100p95.cap3o60p95	No	No	No	No
Mcal_1521	Contig246.Newo100p95.cap3o60p95	No	No	No	No
Mcal_1522	Contig248.Newo100p95.cap3o60p95	No	No	No	No
Mcal_1523	Contig252.Newo100p95.cap3o60p95	Yes	Yes	Yes	Yes
Mcal_1524	Contig253.Newo100p95.cap3o60p95	No	Yes	No	No
Mcal_1525	Contig255.Newo100p95.cap3o60p95	Yes	Yes	Yes	No
Mcal_1526	Contig257.Newo100p95.cap3o60p95	No	No	No	No
Mcal_1527	Contig258.Newo100p95.cap3o60p95	Yes	Yes	Yes	No
Mcal_1528	Contig260.Newo100p95.cap3o60p95	Yes	Yes	Yes	No
Mcal_1529	Contig263.Newo100p95.cap3o60p95	No	No	No	No
Mcal_1530	Contig267.Newo100p95.cap3o60p95	No	Yes	No	No
Mcal_1531	Contig268.Newo100p95.cap3o60p95	No	No	No	No
Mcal_1532	Contig269.Newo100p95.cap3o60p95	No	No	No	No
Mcal_1533	Contig272.Newo100p95.cap3o60p95	No	No	No	No
Mcal_1534	Contig276.Newo100p95.cap3o60p95	Yes	Yes	Yes	Yes
Mcal_1535	Contig277.Newo100p95.cap3o60p95	No	No	No	No
Mcal_1536	Contig283.Newo100p95.cap3o60p95	Yes	Yes	Yes	No
Mcal_1537	Contig287.Newo100p95.cap3o60p95	No	No	No	No
Mcal_1538	Contig294.Newo100p95.cap3o60p95	No	No	No	No
Mcal_1539	Contig296.Newo100p95.cap3o60p95	No	No	No	No
Mcal_1540	Contig298.Newo100p95.cap3o60p95	No	No	No	Yes
Mcal_1541	Contig299.Newo100p95.cap3o60p95	No	No	No	No
Mcal_1542	Contig3.Newo100p95.cap3o60p95	No	No	No	No
Mcal_1543	Contig300.Newo100p95.cap3o60p95	No	No	No	No
Mcal_1544	Contig301.Newo100p95.cap3o60p95	No	No	No	No
Mcal_1545	Contig302.Newo100p95.cap3o60p95	No	No	No	No
Mcal_1546	Contig307.Newo100p95.cap3o60p95	No	No	No	Yes
Mcal_1547	Contig312.Newo100p95.cap3o60p95	No	No	No	No
Mcal_1548	Contig314.Newo100p95.cap3o60p95	No	No	No	No
Mcal_1549	Contig315.Newo100p95.cap3o60p95	No	No	No	No
Mcal_1550	Contig316.Newo100p95.cap3o60p95	No	Yes	No	No
Mcal_1551	Contig318.Newo100p95.cap3o60p95	No	No	No	No
Mcal_1552	Contig32.Newo100p95.cap3o60p95	Yes	Yes	Yes	Yes
Mcal_1553	Contig326.Newo100p95.cap3o60p95	Yes	Yes	Yes	Yes
Mcal_1554	Contig329.Newo100p95.cap3o60p95	No	No	No	No
Mcal_1555	Contig333.Newo100p95.cap3o60p95	Yes	No	No	Yes
Mcal_1556	Contig334.Newo100p95.cap3o60p95	No	No	No	No
Mcal_1557	Contig335.Newo100p95.cap3o60p95	No	No	No	No
Mcal_1558	Contig336.Newo100p95.cap3o60p95	No	No	No	No
Mcal_1559	Contig346.Newo100p95.cap3o60p95	No	Yes	No	No
Mcal_1560	Contig349.Newo100p95.cap3o60p95	No	No	No	No
Mcal_1561	Contig35.Newo100p95.cap3o60p95	No	No	No	No
Mcal_1562	Contig350.Newo100p95.cap3o60p95	No	No	No	No
Mcal_1563	Contig352.Newo100p95.cap3o60p95	No	No	No	No
Mcal_1564	Contig357.Newo100p95.cap3o60p95	No	No	No	No
Mcal_1565	Contig362.Newo100p95.cap3o60p95	Yes	Yes	Yes	Yes
Mcal_1566	Contig365.Newo100p95.cap3o60p95	No	Yes	No	No
Mcal_1567	Contig369.Newo100p95.cap3o60p95	No	No	No	No
Mcal_1568	Contig370.Newo100p95.cap3o60p95	No	No	No	No
Mcal_1569	Contig371.Newo100p95.cap3o60p95	No	No	No	No
Mcal_1570	Contig373.Newo100p95.cap3o60p95	Yes	No	No	No
Mcal_1571	Contig374.Newo100p95.cap3o60p95	No	Yes	No	No
Mcal_1572	Contig378.Newo100p95.cap3o60p95	Yes	Yes	Yes	Yes
Mcal_1573	Contig379.Newo100p95.cap3o60p95	No	No	No	No
Mcal_1574	Contig384.Newo100p95.cap3o60p95	No	No	No	No
Mcal_1575	Contig386.Newo100p95.cap3o60p95	No	No	No	No
Mcal_1576	Contig387.Newo100p95.cap3o60p95	No	No	No	No
Mcal_1577	Contig390.Newo100p95.cap3o60p95	No	No	No	No
Mcal_1578	Contig391.Newo100p95.cap3o60p95	No	No	No	No
Mcal_1579	Contig394.Newo100p95.cap3o60p95	No	No	No	No
Mcal_1580	Contig397.Newo100p95.cap3o60p95	No	Yes	No	No
Mcal_1581	Contig398.Newo100p95.cap3o60p95	No	Yes	No	No
Mcal_1582	Contig4.Newo100p95.cap3o60p95	Yes	Yes	Yes	Yes
Mcal_1583	Contig400.Newo100p95.cap3o60p95	No	No	No	No
Mcal_1584	Contig401.Newo100p95.cap3o60p95	No	No	No	No
Mcal_1585	Contig402.Newo100p95.cap3o60p95	No	No	No	No
Mcal_1586	Contig406.Newo100p95.cap3o60p95	Yes	Yes	Yes	Yes
Mcal_1587	Contig408.Newo100p95.cap3o60p95	No	Yes	No	Yes
Mcal_1588	Contig409.Newo100p95.cap3o60p95	No	No	No	No
Mcal_1589	Contig410.Newo100p95.cap3o60p95	No	No	No	No
Mcal_1590	Contig411.Newo100p95.cap3o60p95	No	No	No	No
Mcal_1591	Contig413.Newo100p95.cap3o60p95	No	No	No	No
Mcal_1592	Contig415.Newo100p95.cap3o60p95	Yes	No	No	No
Mcal_1593	Contig416.Newo100p95.cap3o60p95	No	No	No	No
Mcal_1594	Contig421.Newo100p95.cap3o60p95	Yes	No	No	Yes
Mcal_1595	Contig426.Newo100p95.cap3o60p95	Yes	Yes	Yes	Yes
Mcal_1596	Contig431.Newo100p95.cap3o60p95	No	No	No	No
Mcal_1597	Contig432.Newo100p95.cap3o60p95	No	No	No	Yes
Mcal_1598	Contig434.Newo100p95.cap3o60p95	Yes	Yes	Yes	Yes
Mcal_1599	Contig436.Newo100p95.cap3o60p95	Yes	Yes	Yes	Yes
Mcal_1600	Contig437.Newo100p95.cap3o60p95	No	No	No	No
Mcal_1601	Contig439.Newo100p95.cap3o60p95	No	No	No	No
Mcal_1602	Contig442.Newo100p95.cap3o60p95	No	No	No	No
Mcal_1603	Contig443.Newo100p95.cap3o60p95	No	No	No	No
Mcal_1604	Contig444.Newo100p95.cap3o60p95	No	No	No	No
Mcal_1605	Contig445.Newo100p95.cap3o60p95	No	No	No	No
Mcal_1606	Contig446.Newo100p95.cap3o60p95	No	No	No	No
Mcal_1607	Contig448.Newo100p95.cap3o60p95	Yes	Yes	Yes	Yes
Mcal_1608	Contig449.Newo100p95.cap3o60p95	No	No	No	No
Mcal_1609	Contig450.Newo100p95.cap3o60p95	No	No	No	No
Mcal_1610	Contig452.Newo100p95.cap3o60p95	No	Yes	No	No
Mcal_1611	Contig453.Newo100p95.cap3o60p95	No	No	No	No
Mcal_1612	Contig454.Newo100p95.cap3o60p95	No	No	No	No
Mcal_1613	Contig459.Newo100p95.cap3o60p95	No	Yes	No	No
Mcal_1614	Contig460.Newo100p95.cap3o60p95	No	No	No	No
Mcal_1615	Contig462.Newo100p95.cap3o60p95	Yes	Yes	Yes	Yes
Mcal_1616	Contig463.Newo100p95.cap3o60p95	No	No	No	No
Mcal_1617	Contig464.Newo100p95.cap3o60p95	No	No	No	No
Mcal_1618	Contig467.Newo100p95.cap3o60p95	No	No	No	No
Mcal_1619	Contig469.Newo100p95.cap3o60p95	No	No	No	No
Mcal_1620	Contig470.Newo100p95.cap3o60p95	Yes	Yes	Yes	No
Mcal_1621	Contig474.Newo100p95.cap3o60p95	No	No	No	No
Mcal_1622	Contig476.Newo100p95.cap3o60p95	No	No	No	No
Mcal_1623	Contig478.Newo100p95.cap3o60p95	No	No	No	No
Mcal_1624	Contig480.Newo100p95.cap3o60p95	Yes	No	No	No
Mcal_1625	Contig483.Newo100p95.cap3o60p95	No	No	No	No
Mcal_1626	Contig485.Newo100p95.cap3o60p95	No	No	No	No
Mcal_1627	Contig487.Newo100p95.cap3o60p95	Yes	No	No	No
Mcal_1628	Contig489.Newo100p95.cap3o60p95	Yes	No	No	Yes
Mcal_1629	Contig490.Newo100p95.cap3o60p95	Yes	No	No	Yes
Mcal_1630	Contig491.Newo100p95.cap3o60p95	No	No	No	No
Mcal_1631	Contig494.Newo100p95.cap3o60p95	No	No	No	No
Mcal_1632	Contig497.Newo100p95.cap3o60p95	No	No	No	No
Mcal_1633	Contig498.Newo100p95.cap3o60p95	Yes	No	No	No
Mcal_1634	Contig5.Newo100p95.cap3o60p95	Yes	Yes	Yes	No
Mcal_1635	Contig500.Newo100p95.cap3o60p95	No	No	No	No
Mcal_1636	Contig501.Newo100p95.cap3o60p95	Yes	Yes	Yes	Yes
Mcal_1637	Contig503.Newo100p95.cap3o60p95	No	No	No	No
Mcal_1638	Contig506.Newo100p95.cap3o60p95	Yes	Yes	Yes	Yes
Mcal_1639	Contig507.Newo100p95.cap3o60p95	Yes	Yes	Yes	Yes
Mcal_1640	Contig510.Newo100p95.cap3o60p95	No	No	No	No
Mcal_1641	Contig511.Newo100p95.cap3o60p95	No	No	No	No
Mcal_1642	Contig513.Newo100p95.cap3o60p95	No	No	No	No
Mcal_1643	Contig514.Newo100p95.cap3o60p95	No	No	No	Yes
Mcal_1644	Contig516.Newo100p95.cap3o60p95	No	No	No	No
Mcal_1645	Contig517.Newo100p95.cap3o60p95	Yes	Yes	Yes	Yes
Mcal_1646	Contig519.Newo100p95.cap3o60p95	No	No	No	No
Mcal_1647	Contig521.Newo100p95.cap3o60p95	No	No	No	No
Mcal_1648	Contig522.Newo100p95.cap3o60p95	Yes	Yes	Yes	No
Mcal_1649	Contig523.Newo100p95.cap3o60p95	No	No	No	No
Mcal_1650	Contig524.Newo100p95.cap3o60p95	No	No	No	No
Mcal_1651	Contig525.Newo100p95.cap3o60p95	No	No	No	No
Mcal_1652	Contig527.Newo100p95.cap3o60p95	No	No	No	No
Mcal_1653	Contig528.Newo100p95.cap3o60p95	No	No	No	No
Mcal_1654	Contig53.Newo100p95.cap3o60p95	No	No	No	No
Mcal_1655	Contig531.Newo100p95.cap3o60p95	Yes	Yes	Yes	No
Mcal_1656	Contig532.Newo100p95.cap3o60p95	No	No	No	No
Mcal_1657	Contig533.Newo100p95.cap3o60p95	No	No	No	No
Mcal_1658	Contig534.Newo100p95.cap3o60p95	Yes	Yes	Yes	Yes
Mcal_1659	Contig535.Newo100p95.cap3o60p95	No	No	No	No
Mcal_1660	Contig537.Newo100p95.cap3o60p95	No	No	No	No
Mcal_1661	Contig538.Newo100p95.cap3o60p95	Yes	Yes	Yes	Yes
Mcal_1662	Contig541.Newo100p95.cap3o60p95	Yes	Yes	Yes	Yes
Mcal_1663	Contig545.Newo100p95.cap3o60p95	No	No	No	No
Mcal_1664	Contig547.Newo100p95.cap3o60p95	Yes	Yes	Yes	No
Mcal_1665	Contig548.Newo100p95.cap3o60p95	No	Yes	No	Yes
Mcal_1666	Contig549.Newo100p95.cap3o60p95	No	No	No	No
Mcal_1667	Contig550.Newo100p95.cap3o60p95	Yes	Yes	Yes	Yes
Mcal_1668	Contig552.Newo100p95.cap3o60p95	Yes	Yes	Yes	No
Mcal_1669	Contig553.Newo100p95.cap3o60p95	No	No	No	No
Mcal_1670	Contig554.Newo100p95.cap3o60p95	No	No	No	No
Mcal_1671	Contig556.Newo100p95.cap3o60p95	No	No	No	No
Mcal_1672	Contig60.Newo100p95.cap3o60p95	No	No	No	No
Mcal_1673	Contig696.Newo100p95.cap3o60p95	No	No	No	No
Mcal_1674	Contig698.Newo100p95.cap3o60p95	No	No	No	No
Mcal_1675	Contig700.Newo100p95.cap3o60p95	No	No	No	No
Mcal_1676	Contig701.Newo100p95.cap3o60p95	No	No	No	No
Mcal_1677	Contig702.Newo100p95.cap3o60p95	No	No	No	No
Mcal_1678	Contig704.Newo100p95.cap3o60p95	Yes	Yes	Yes	No
Mcal_1679	Contig707.Newo100p95.cap3o60p95	Yes	No	No	Yes
Mcal_1680	Contig708.Newo100p95.cap3o60p95	Yes	Yes	Yes	No
Mcal_1681	Contig709.Newo100p95.cap3o60p95	No	No	No	No
Mcal_1682	Contig710.Newo100p95.cap3o60p95	No	No	No	No
Mcal_1683	Contig713.Newo100p95.cap3o60p95	Yes	Yes	Yes	Yes
Mcal_1684	Contig714.Newo100p95.cap3o60p95	No	No	No	No
Mcal_1685	Contig718.Newo100p95.cap3o60p95	No	No	No	No
Mcal_1686	Contig719.Newo100p95.cap3o60p95	No	Yes	No	No
Mcal_1687	Contig727.Newo100p95.cap3o60p95	No	No	No	No
Mcal_1688	Contig733.Newo100p95.cap3o60p95	Yes	Yes	Yes	Yes
Mcal_1689	Contig737.Newo100p95.cap3o60p95	No	No	No	No
Mcal_1690	Contig739.Newo100p95.cap3o60p95	No	No	No	No
Mcal_1691	Contig742.Newo100p95.cap3o60p95	No	No	No	No
Mcal_1692	Contig743.Newo100p95.cap3o60p95	No	Yes	No	No
Mcal_1693	Contig746.Newo100p95.cap3o60p95	No	No	No	No
Mcal_1694	Contig748.Newo100p95.cap3o60p95	No	No	No	No
Mcal_1695	Contig749.Newo100p95.cap3o60p95	Yes	Yes	Yes	No
Mcal_1696	Contig755.Newo100p95.cap3o60p95	Yes	Yes	Yes	Yes
Mcal_1697	Contig757.Newo100p95.cap3o60p95	No	No	No	No
Mcal_1698	Contig758.Newo100p95.cap3o60p95	Yes	Yes	Yes	No
Mcal_1699	Contig759.Newo100p95.cap3o60p95	No	No	No	No
Mcal_1700	Contig76.Newo100p95.cap3o60p95	Yes	Yes	Yes	No
Mcal_1701	Contig761.Newo100p95.cap3o60p95	No	No	No	No
Mcal_1702	Contig763.Newo100p95.cap3o60p95	No	No	No	No
Mcal_1703	Contig766.Newo100p95.cap3o60p95	No	Yes	No	No
Mcal_1704	Contig772.Newo100p95.cap3o60p95	Yes	No	No	No
Mcal_1705	Contig775.Newo100p95.cap3o60p95	No	No	No	No
Mcal_1706	Contig779.Newo100p95.cap3o60p95	No	No	No	No
Mcal_1707	Contig780.Newo100p95.cap3o60p95	No	No	No	No
Mcal_1708	Contig789.Newo100p95.cap3o60p95	No	No	No	No
Mcal_1709	Contig79.Newo100p95.cap3o60p95	Yes	Yes	Yes	No
Mcal_1710	Contig790.Newo100p95.cap3o60p95	No	No	No	No
Mcal_1711	Contig791.Newo100p95.cap3o60p95	No	No	No	No
Mcal_1712	Contig792.Newo100p95.cap3o60p95	No	No	No	No
Mcal_1713	Contig798.Newo100p95.cap3o60p95	Yes	Yes	Yes	Yes
Mcal_1714	Contig799.Newo100p95.cap3o60p95	No	No	No	No
Mcal_1715	Contig800.Newo100p95.cap3o60p95	No	No	No	No
Mcal_1716	Contig802.Newo100p95.cap3o60p95	Yes	Yes	Yes	Yes
Mcal_1717	Contig803.Newo100p95.cap3o60p95	No	No	No	No
Mcal_1718	Contig805.Newo100p95.cap3o60p95	No	No	No	No
Mcal_1719	Contig81.Newo100p95.cap3o60p95	Yes	Yes	Yes	Yes
Mcal_1720	Contig812.Newo100p95.cap3o60p95	No	No	No	No
Mcal_1721	Contig813.Newo100p95.cap3o60p95	No	No	No	No
Mcal_1722	Contig816.Newo100p95.cap3o60p95	No	No	No	No
Mcal_1723	Contig818.Newo100p95.cap3o60p95	No	No	No	No
Mcal_1724	Contig819.Newo100p95.cap3o60p95	Yes	Yes	Yes	Yes
Mcal_1725	Contig82.Newo100p95.cap3o60p95	Yes	Yes	Yes	No
Mcal_1726	Contig822.Newo100p95.cap3o60p95	No	No	No	No
Mcal_1727	Contig823.Newo100p95.cap3o60p95	No	No	No	No
Mcal_1728	Contig824.Newo100p95.cap3o60p95	No	No	No	No
Mcal_1729	Contig826.Newo100p95.cap3o60p95	Yes	Yes	Yes	No
Mcal_1730	Contig828.Newo100p95.cap3o60p95	Yes	Yes	Yes	Yes
Mcal_1731	Contig829.Newo100p95.cap3o60p95	Yes	Yes	Yes	No
Mcal_1732	Contig830.Newo100p95.cap3o60p95	No	No	No	No
Mcal_1733	Contig833.Newo100p95.cap3o60p95	Yes	Yes	Yes	Yes
Mcal_1734	Contig834.Newo100p95.cap3o60p95	No	Yes	No	Yes
Mcal_1735	Contig837.Newo100p95.cap3o60p95	No	Yes	No	Yes
Mcal_1736	Contig838.Newo100p95.cap3o60p95	No	No	No	No
Mcal_1737	Contig843.Newo100p95.cap3o60p95	No	No	No	No
Mcal_1738	Contig847.Newo100p95.cap3o60p95	No	No	No	No
Mcal_1739	Contig849.Newo100p95.cap3o60p95	No	No	No	No
Mcal_1740	Contig851.Newo100p95.cap3o60p95	No	No	No	No
Mcal_1741	Contig852.Newo100p95.cap3o60p95	No	Yes	No	Yes
Mcal_1742	Contig854.Newo100p95.cap3o60p95	No	No	No	No
Mcal_1743	Contig856.Newo100p95.cap3o60p95	No	No	No	No
Mcal_1744	Contig857.Newo100p95.cap3o60p95	Yes	Yes	Yes	Yes
Mcal_1745	Contig859.Newo100p95.cap3o60p95	Yes	Yes	Yes	No
Mcal_1746	Contig86.Newo100p95.cap3o60p95	No	No	No	No
Mcal_1747	Contig860.Newo100p95.cap3o60p95	Yes	Yes	Yes	Yes
Mcal_1748	Contig862.Newo100p95.cap3o60p95	Yes	Yes	Yes	Yes
Mcal_1749	Contig863.Newo100p95.cap3o60p95	No	No	No	No
Mcal_1750	Contig865.Newo100p95.cap3o60p95	No	No	No	No
Mcal_1751	Contig869.Newo100p95.cap3o60p95	No	No	No	No
Mcal_1752	Contig871.Newo100p95.cap3o60p95	No	Yes	No	No
Mcal_1753	Contig875.Newo100p95.cap3o60p95	No	No	No	No
Mcal_1754	Contig879.Newo100p95.cap3o60p95	Yes	Yes	Yes	No
Mcal_1755	Contig881.Newo100p95.cap3o60p95	Yes	Yes	Yes	Yes
Mcal_1756	Contig882.Newo100p95.cap3o60p95	No	No	No	No
Mcal_1757	Contig885.Newo100p95.cap3o60p95	No	No	No	No
Mcal_1758	Contig886.Newo100p95.cap3o60p95	No	Yes	No	No
Mcal_1759	Contig887.Newo100p95.cap3o60p95	No	No	No	No
Mcal_1760	Contig892.Newo100p95.cap3o60p95	No	No	No	No
Mcal_1761	Contig895.Newo100p95.cap3o60p95	No	Yes	No	No
Mcal_1762	Contig896.Newo100p95.cap3o60p95	No	No	No	No
Mcal_1763	Contig897.Newo100p95.cap3o60p95	No	No	No	No
Mcal_1764	Contig898.Newo100p95.cap3o60p95	No	Yes	No	Yes
Mcal_1765	Contig901.Newo100p95.cap3o60p95	No	No	No	No
Mcal_1766	Contig902.Newo100p95.cap3o60p95	No	No	No	No
Mcal_1767	Contig908.Newo100p95.cap3o60p95	No	No	No	Yes
Mcal_1768	Contig910.Newo100p95.cap3o60p95	No	No	No	Yes
Mcal_1769	Contig913.Newo100p95.cap3o60p95	No	No	No	No
Mcal_1770	Contig914.Newo100p95.cap3o60p95	No	No	No	No
Mcal_1771	Contig92.Newo100p95.cap3o60p95	No	No	No	No
Mcal_1772	Contig920.Newo100p95.cap3o60p95	No	No	No	No
Mcal_1773	Contig921.Newo100p95.cap3o60p95	Yes	Yes	Yes	No
Mcal_1774	Contig925.Newo100p95.cap3o60p95	No	No	No	No
Mcal_1775	Contig926.Newo100p95.cap3o60p95	No	No	No	No
Mcal_1776	Contig927.Newo100p95.cap3o60p95	No	No	No	No
Mcal_1777	Contig928.Newo100p95.cap3o60p95	No	No	No	No
Mcal_1778	Contig929.Newo100p95.cap3o60p95	Yes	Yes	Yes	No
Mcal_1779	Contig93.Newo100p95.cap3o60p95	No	No	No	No
Mcal_1780	Contig930.Newo100p95.cap3o60p95	No	No	No	No
Mcal_1781	Contig931.Newo100p95.cap3o60p95	No	Yes	No	No
Mcal_1782	Contig932.Newo100p95.cap3o60p95	No	No	No	No
Mcal_1783	Contig933.Newo100p95.cap3o60p95	No	No	No	No
Mcal_1784	Contig934.Newo100p95.cap3o60p95	No	No	No	No
Mcal_1785	Contig936.Newo100p95.cap3o60p95	No	No	No	No
Mcal_1786	Contig938.Newo100p95.cap3o60p95	No	No	No	No
Mcal_1787	Contig939.Newo100p95.cap3o60p95	Yes	Yes	Yes	No
Mcal_1788	Contig94.Newo100p95.cap3o60p95	No	No	No	No
Mcal_1789	Contig943.Newo100p95.cap3o60p95	No	No	No	Yes
Mcal_1790	Contig945.Newo100p95.cap3o60p95	No	Yes	No	Yes
Mcal_1791	Contig946.Newo100p95.cap3o60p95	No	No	No	No
Mcal_1792	Contig947.Newo100p95.cap3o60p95	Yes	Yes	Yes	Yes
Mcal_1793	Contig95.Newo100p95.cap3o60p95	No	No	No	No
Mcal_1794	Contig954.Newo100p95.cap3o60p95	No	Yes	No	No
Mcal_1795	Contig963.Newo100p95.cap3o60p95	No	No	No	No
Mcal_1796	Contig969.Newo100p95.cap3o60p95	Yes	No	No	Yes
Mcal_1797	Contig97.Newo100p95.cap3o60p95	Yes	Yes	Yes	Yes
Mcal_1798	Contig973.Newo100p95.cap3o60p95	Yes	Yes	Yes	Yes
Mcal_1799	Contig976.Newo100p95.cap3o60p95	No	No	No	Yes
Mcal_1800	Contig977.Newo100p95.cap3o60p95	No	Yes	No	No
Mcal_1801	Contig978.Newo100p95.cap3o60p95	No	No	No	No
Mcal_1802	Contig984.Newo100p95.cap3o60p95	Yes	Yes	Yes	Yes
Mcal_1803	Contig988.Newo100p95.cap3o60p95	No	Yes	No	No
Mcal_1804	Contig989.Newo100p95.cap3o60p95	No	No	No	No
Mcal_1805	Contig990.Newo100p95.cap3o60p95	No	No	No	No
Mcal_1806	Contig992.Newo100p95.cap3o60p95	No	No	No	No
Mcal_1807	Contig995.Newo100p95.cap3o60p95	No	No	No	No
Mcal_1808	Contig998.Newo100p95.cap3o60p95	No	No	No	No
Mcal_1809	G232G8W04H0KPN_palp	No	No	No	No
Mcal_1810	G232G8W04H0M8Q_palp	No	No	No	No
Mcal_1811	G232G8W04H1B10_leg	Yes	Yes	Yes	No
Mcal_1812	G232G8W04H1BFE_leg	No	No	No	No
Mcal_1813	G232G8W04H1NRZ_palp	No	No	No	No
Mcal_1814	G232G8W04H1PEM_leg	No	No	No	No
Mcal_1815	G232G8W04H3TIX_leg	No	No	No	No
Mcal_1816	G232G8W04H4QL0_palp	No	Yes	No	Yes
Mcal_1817	G232G8W04H4UOQ_palp	Yes	Yes	Yes	No
Mcal_1818	G232G8W04H4VGB_palp	No	No	No	No
Mcal_1819	G232G8W04H4WVG_palp	No	No	No	No
Mcal_1820	G232G8W04H4YGZ_leg	No	No	No	No
Mcal_1821	G232G8W04H51RS_leg	No	No	No	No
Mcal_1822	G232G8W04H53E8_leg	Yes	Yes	Yes	No
Mcal_1823	G232G8W04H5DQO_palp	No	No	No	No
Mcal_1824	G232G8W04H5I75_palp	No	No	No	No
Mcal_1825	G232G8W04H5NS1_leg	No	No	No	No
Mcal_1826	G232G8W04H5SJ6_palp	No	No	No	No
Mcal_1827	G232G8W04H5V90_leg	No	No	No	No
Mcal_1828	G232G8W04H6LFQ_leg	No	No	No	No
Mcal_1829	G232G8W04H6V8C_leg	No	No	No	No
Mcal_1830	G232G8W04H7IY7_palp	No	No	No	No
Mcal_1831	G232G8W04H7QGR_leg	No	No	No	No
Mcal_1832	G232G8W04H85FY_leg	No	No	No	No
Mcal_1833	G232G8W04H9G9E_leg	No	No	No	No
Mcal_1834	G232G8W04H9M9Y_leg	No	No	No	No
Mcal_1835	G232G8W04H9YFQ_leg	No	Yes	No	Yes
Mcal_1836	G232G8W04I0ISQ_leg	No	No	No	No
Mcal_1837	G232G8W04I0SBQ_leg	No	No	No	No
Mcal_1838	G232G8W04I1T73_leg	No	No	No	No
Mcal_1839	G232G8W04I1Y4F_leg	Yes	No	No	Yes
Mcal_1840	G232G8W04I237E_palp	No	No	No	No
Mcal_1841	G232G8W04I2T8M_palp	No	No	No	No
Mcal_1842	G232G8W04I3HQ8_palp	No	No	No	No
Mcal_1843	G232G8W04I5DV7_palp	No	No	No	No
Mcal_1844	G232G8W04I5DWT_palp	No	No	No	No
Mcal_1845	G232G8W04I5M89_palp	No	No	No	No
Mcal_1846	G232G8W04I7479_palp	No	No	No	No
Mcal_1847	G232G8W04I7E09_palp	No	No	No	No
Mcal_1848	G232G8W04I7Y7V_leg	No	No	No	No
Mcal_1849	G232G8W04I8BSJ_leg	No	No	No	No
Mcal_1850	G232G8W04I9Z8J_palp	No	No	No	No
Mcal_1851	G232G8W04IA9DW_palp	No	No	No	No
Mcal_1852	G232G8W04IADGP_leg	No	No	No	No
Mcal_1853	G232G8W04IAKIT_palp	Yes	Yes	Yes	No
Mcal_1854	G232G8W04IB7PP_palp	No	No	No	No
Mcal_1855	G232G8W04IBABN_leg	No	No	No	No
Mcal_1856	G232G8W04IBHST_leg	No	No	No	No
Mcal_1857	G232G8W04IBO99_palp	No	No	No	No
Mcal_1858	G232G8W04IC3QG_palp	No	No	No	No
Mcal_1859	G232G8W04IC97V_palp	No	No	No	No
Mcal_1860	G232G8W04ICXZX_leg	No	No	No	No
Mcal_1861	G232G8W04IDF50_palp	No	No	No	No
Mcal_1862	G232G8W04IDV7J_palp	No	No	No	No
Mcal_1863	G232G8W04IENQM_palp	No	No	No	No
Mcal_1864	G232G8W04IEYYL_palp	No	No	No	No
Mcal_1865	G232G8W04IGSPF_palp	No	No	No	No
Mcal_1866	G232G8W04IHFK0_palp	No	No	No	No
Mcal_1867	G232G8W04IHHJ8_leg	No	No	No	No
Mcal_1868	G232G8W04II2HK_leg	No	No	No	No
Mcal_1869	G232G8W04IIB4H_leg	No	No	No	No
Mcal_1870	G232G8W04IPAQB_palp	No	No	No	No
Mcal_1871	G232G8W04IPJY7_palp	No	No	No	No
Mcal_1872	G232G8W04IQ2CG_leg	No	No	No	No
Mcal_1873	G232G8W04IQAW1_leg	No	No	No	No
Mcal_1874	G232G8W04IQYSX_leg	Yes	No	No	No
Mcal_1875	G232G8W04IR474_leg	No	Yes	No	No
Mcal_1876	G232G8W04IRBGW_palp	No	No	No	No
Mcal_1877	G232G8W04IRLKX_leg	No	No	No	No
Mcal_1878	G232G8W04IRWHT_palp	No	No	No	No
Mcal_1879	G232G8W04IRXCK_palp	No	No	No	No
Mcal_1880	G232G8W04IS5VG_palp	No	No	No	No
Mcal_1881	G232G8W04ISHU1_leg	No	No	No	No
Mcal_1882	G232G8W04IT006_leg	No	No	No	No
Mcal_1883	G232G8W04ITS0A_leg	No	No	No	No
Mcal_1884	G232G8W04IU0B0_palp	No	No	No	No
Mcal_1885	G232G8W04IV7PW_leg	No	No	No	No
Mcal_1886	G232G8W04IVTXD_leg	No	No	No	No
Mcal_1887	G232G8W04IW0WD_leg	No	No	No	No
Mcal_1888	G232G8W04IW370_leg	No	No	No	No
Mcal_1889	G232G8W04IWD8K_palp	No	Yes	No	No
Mcal_1890	G232G8W04IWUX6_leg	No	No	No	No
Mcal_1891	G232G8W04IWWME_leg	No	No	No	No
Mcal_1892	G232G8W04IX3YM_leg	No	No	No	No
Mcal_1893	G232G8W04IX8Y1_leg	Yes	No	No	No
Mcal_1894	G232G8W04IXJ5V_leg	No	No	No	No
Mcal_1895	G232G8W04IXU34_leg	No	No	No	No
Mcal_1896	G232G8W04IYCBW_palp	Yes	Yes	Yes	No
Mcal_1897	G232G8W04IYHEW_leg	No	No	No	No
Mcal_1898	G232G8W04IZ6HC_leg	No	No	No	No
Mcal_1899	G232G8W04IZP7P_leg	Yes	Yes	Yes	Yes
Mcal_1900	G232G8W04IZTUP_palp	No	No	No	No
Mcal_1901	G232G8W04J01PD_leg	No	No	No	No
Mcal_1902	G232G8W04JA2RW_leg	No	No	No	No
Mcal_1903	G232G8W04JAKOW_palp	No	No	No	Yes
Mcal_1904	G232G8W04JALH5_palp	No	No	No	No
Mcal_1905	G232G8W04JB8I1_leg	No	No	No	No
Mcal_1906	G232G8W04JC9VR_leg	No	No	No	No
Mcal_1907	G232G8W04JCM9I_palp	No	No	No	No
Mcal_1908	G232G8W04JDGL7_palp	No	No	No	Yes
Mcal_1909	G232G8W04JDJXG_leg	No	No	No	No
Mcal_1910	G232G8W04JEJN6_leg	No	No	No	No
Mcal_1911	G232G8W04JF0CH_palp	No	No	No	No
Mcal_1912	G232G8W04JFVNZ_leg	No	No	No	No
Mcal_1913	G232G8W04JGP47_leg	No	No	No	No
Mcal_1914	G232G8W04JHNSJ_leg	No	No	No	No
Mcal_1915	G232G8W04JHPBW_leg	No	No	No	No
Mcal_1916	G232G8W04JI88M_leg	No	No	No	No
Mcal_1917	G232G8W04JIM6I_palp	No	No	No	No
Mcal_1918	G232G8W04JINBM_palp	No	No	No	No
Mcal_1919	G232G8W04JKWSV_palp	No	No	No	No
Mcal_1920	G232G8W04JL1HD_palp	No	Yes	No	No
Mcal_1921	G232G8W04JNHA7_palp	No	No	No	No
Mcal_1922	G232G8W04JOLI9_leg	Yes	Yes	Yes	Yes
Mcal_1923	G232G8W04JPHOC_palp	No	No	No	No
Mcal_1924	G232G8W04JQ2QJ_leg	No	No	No	No
Mcal_1925	G232G8W04JRE39_leg	No	No	No	No
Mcal_1926	G232G8W04JRWN0_palp	No	No	No	No
Mcal_1927	G232G8W04JT5IZ_palp	No	Yes	No	Yes
Mcal_1928	G232G8W04JUPHP_leg	No	No	No	No
Mcal_1929	G232G8W04JUT1R_leg	No	No	No	No
Mcal_1930	G232G8W04JV2M8_palp	Yes	Yes	Yes	Yes
Mcal_1931	G232G8W04JVFVZ_palp	No	No	No	No
Mcal_1932	G232G8W04JW7ZZ_palp	No	No	No	No
Mcal_1933	G232G8W04JW87X_palp	No	No	No	No
Mcal_1934	G232G8W04JW95G_palp	No	No	No	Yes
Mcal_1935	G232G8W04JWA52_palp	No	No	No	No
Mcal_1936	G232G8W04JWU96_palp	No	No	No	No
Mcal_1937	G232G8W04JWXR1_palp	No	No	No	No
Mcal_1938	contig00021	No	No	No	No
Mcal_1939	contig00037	No	No	No	No
Mcal_1940	contig00063	Yes	No	No	No
Mcal_1941	contig00069	No	No	No	No
Mcal_1942	contig00085	No	No	No	No
Mcal_1943	contig00135	No	No	No	No
Mcal_1944	contig00187	No	No	No	No
Mcal_1945	contig00256	Yes	Yes	Yes	No
Mcal_1946	isotig00095	No	No	No	No
Mcal_1947	isotig00099	No	Yes	No	Yes
Mcal_1948	isotig00159	Yes	Yes	Yes	Yes
Mcal_1949	isotig00180	No	No	No	No
Mcal_1950	isotig00224	Yes	Yes	Yes	Yes
Mcal_1951	isotig00230	No	No	No	No
Mcal_1952	isotig00232	Yes	No	No	No
Mcal_1953	isotig00255	Yes	Yes	Yes	Yes
Mcal_1954	isotig00258	No	Yes	No	No
Mcal_1955	isotig00274	Yes	Yes	Yes	No
Mcal_1956	isotig00277	Yes	Yes	Yes	No
Mcal_1957	isotig00285	No	No	No	No
Mcal_1958	isotig00302	Yes	Yes	Yes	Yes
Mcal_1959	isotig00308	No	No	No	No
Mcal_1960	isotig00309	No	No	No	No
Mcal_1961	isotig00317	Yes	Yes	Yes	No
Mcal_1962	isotig00330	Yes	Yes	Yes	Yes
Mcal_1963	isotig00339	Yes	Yes	Yes	Yes
Mcal_1964	isotig00343	No	No	No	Yes
Mcal_1965	isotig00348	No	No	No	No
Mcal_1966	isotig00350	Yes	No	No	No
Mcal_1967	isotig00355	Yes	No	No	No
Mcal_1968	isotig00356	No	No	No	Yes
Mcal_1969	isotig00359	No	Yes	No	Yes
Mcal_1970	isotig00363	No	No	No	No
Mcal_1971	isotig00376	Yes	Yes	Yes	Yes
Mcal_1972	isotig00386	No	No	No	No
Mcal_1973	isotig00387	No	No	No	No
Mcal_1974	isotig00396	No	No	No	No
Mcal_1975	isotig00413	No	Yes	No	No
Mcal_1976	isotig00424	No	No	No	No
Mcal_1977	isotig00437	No	No	No	No
Mcal_1978	isotig00438	Yes	Yes	Yes	No
Mcal_1979	isotig00441	No	No	No	No
Mcal_1980	isotig00444	No	No	No	No
Mcal_1981	isotig00448	Yes	No	No	No
Mcal_1982	isotig00450	No	No	No	No
Mcal_1983	isotig00454	Yes	Yes	Yes	Yes
Mcal_1984	isotig00456	No	No	No	No
Mcal_1985	isotig00463	Yes	Yes	Yes	Yes
Mcal_1986	isotig00466	No	Yes	No	Yes
Mcal_1987	isotig00467	No	Yes	No	Yes
Mcal_1988	isotig00474	No	No	No	No
Mcal_1989	isotig00475	No	No	No	No
Mcal_1990	isotig00476	No	No	No	No
Mcal_1991	isotig00477	No	No	No	No
Mcal_1992	isotig00483	No	Yes	No	No
Mcal_1993	isotig00484	No	No	No	No
Mcal_1994	isotig00486	No	No	No	No
Mcal_1995	isotig00490	No	No	No	No
Mcal_1996	isotig00494	No	Yes	No	Yes
Mcal_1997	isotig00498	No	Yes	No	No
[truncated: 4,699 more rows]
