# Supplementary material for: Comparative analysis of tissue-specific transcriptomes in the funnel-web spider Macrothele calpeiana (Araneae, Hexathelidae)
Source: PeerJ. 2015 Jun 30;3:e1064. doi: 10.7717/peerj.1064 (PMC4493671; doi:10.7717/peerj.1064)
Supplement: Table S8 — List of the 35 genes used to infer the phylogenetic relationships among of major Mygalomorphae lineages sampled. [file peerj-03-1064-s008.xlsx]

## Sheet: Taxa in MSA
Table S8.	List of the 35 genes used in molecular phylogenetics analysis
Information from Ixodes scapularis				Information of M. calpeiana (used in phylogenetics)			Taxa in MSA
Gene ID	Protein ID	Description	Amino acid length	Sequence_ID	Contig_ID	Amino acid length	Number of covered taxa
89645	B7QHE0	Laminin beta 1 chain	995	Mcal_6261	isotig02522	80	17
89647	B7QL68	Eukaryotic translation initiation factor	235	Mcal_5387	G232G8W04IXN4A_palp	87	20
89658	B7QIP4	4SNc-Tudor domain protein	796	Mcal_1090	isotig02057	85	19
89683	B7PGQ2	Calnexin	447	Mcal_2551	Contig147.Newo100p95.cap3o60p95	94	14
89740	B7PM02	Proteasome subunit beta type	247	Mcal_1402	isotig01426	82	19
89771	B7Q8E4	Splicing factor 3A	491	Mcal_1219	isotig02709	107	12
89814	B7PV98	Cop-coated vesicle membrane protein P24	186	Mcal_3249	G232G8W04IKDT4_ovary	148	18
89853	B7PJA8	Long chain fatty acid CoA ligase	598	Mcal_1390	isotig00828	147	15
89942	B7PIZ2	ADP-ribosylation factor	173	Mcal_3706	isotig00535	93	16
90015	B7PI71	NADH:ubiquinone oxidoreductase, NDUFS2/49 kDa subunit	422	Mcal_489	G232G8W04IKS2C_leg	143	18
90099	B7P7A5	Ribophorin	556	Mcal_40	Contig484.Newo100p95.cap3o60p95	206	17
90123	B7PN57	Ornithine aminotransferase	393	Mcal_2888	Contig89.Newo100p95.cap3o60p95	209	19
90137	B7PBW3	Protein disulfide isomerase 1	391	Mcal_4098	isotig02826	108	17
90175	B7P4U1	Protein disulfide isomerase	465	Mcal_2610	Contig787.Newo100p95.cap3o60p95	178	19
90249	B7PL27	Signal peptide peptidase	312	Mcal_959	isotig00893	136	20
90305	B7P4G1	Exon-exon junction complex, Magoh component	146	Mcal_4019	isotig02317	118	18
90319	B7PTH8	Aspartyl-tRNA synthetase	458	Mcal_6158	isotig02186	110	17
90340	B7PSE0	Protein kinase C and casein kinase substrate in neurons protein	357	Mcal_4566	G232G8W04H8D27_palp	91	20
90358	B7P2I5	Dipeptidyl peptidase III	267	Mcal_6437	isotig03059	88	13
90395	B7P6C9	Transitional endoplasmic reticulum ATPase	175	Mcal_4018	isotig02309	117	14
90396	B7Q323	Coronin	794	Mcal_111	G232G8W04H4HB2_leg	130	19
90407	B7P7U3	Nonsense-mediated mRNA decay protein	240	Mcal_3209	G232G8W04IH7RI_ovary	89	18
90418	B7P8F8	tRNA uracil-5-methyltransferase	320	Mcal_6237	isotig02459	123	18
90448	B7QI01	Carnitine palmitoyltransferase II	684	Mcal_2646	isotig00704	305	20
90499	B7Q9N8	Putative uncharacterized protein	517	Mcal_1224	isotig02721	116	11
90500	B7PGW2	RAS	250	Mcal_2202	isotig01163	114	14
90514	B7QIS0	Protein phosphatase	122	Mcal_6024	isotig01693	83	19
90545	B7PBU8	Apoptosis-promoting RNA-binding protein TIA-1/TIAR	283	Mcal_4031	isotig02381	130	20
90546	B7P6W4	ATP binding protein	181	Mcal_1800	Contig977.Newo100p95.cap3o60p95	174	19
90589	B7PEK0	Holocytochrome C synthase/heme-lyase	195	Mcal_966	isotig00993	152	10
90600		Putative uncharacterized protein	126	Mcal_6039	isotig01750	105	19
90609	B7Q1W5	Elongation factor 1 gamma	397	Mcal_2242	isotig01300	160	20
90625	B7P5C4	Translation initiation factor 4F, helicase subunit	400	Mcal_2032	isotig00652	242	20
90648	B7PLI1	Rwd domain-containing protein	219	Mcal_6274	isotig02564	98	13
90656	B7PEV0	Chaperonin subunit	553	Mcal_1405	isotig01491	83	17
						4531	17.1143
							º
